# Supplementary material for: Time-series analysis reveals genetic responses to intensive management of razorback sucker (Xyrauchen texanus)
Source: PubMed Central journal article supplement (PMC3962295; doi:10.1111/eva.12125), 2013-11-15
Supplement: eva0007-0339-sd1.pdf [file eva0007-0339-sd1.pdf]

**Supplemental Table 1.** Frequency of each mtDNA haplotype for each year.

| Haplotype | total |           | 1997 |           | 1998 |           | 1999 |           |
|-----------|-------|-----------|------|-----------|------|-----------|------|-----------|
|           | #     | FREQUENCY | #    | FREQUENCY | #    | FREQUENCY | #    | FREQUENCY |
| A         | 288   | 0.045     | 9    | 0.027     | 12   | 0.025     | 3    | 0.010     |
| B         | 548   | 0.088     | 47   | 0.139     | 36   | 0.074     | 27   | 0.093     |
| C         | 130   | 0.020     | 18   | 0.053     | 8    | 0.017     | 0    | 0.000     |
| D         | 5     | 0.001     | 0    | 0.000     | 0    | 0.000     | 0    | 0.000     |
| E         | 3899  | 0.616     | 197  | 0.583     | 321  | 0.663     | 199  | 0.684     |
| F         | 138   | 0.022     | 13   | 0.038     | 14   | 0.029     | 13   | 0.045     |
| G         | 49    | 0.007     | 1    | 0.003     | 1    | 0.002     | 2    | 0.007     |
| H         | 52    | 0.009     | 2    | 0.006     | 6    | 0.012     | 1    | 0.003     |
| I         | 23    | 0.003     | 1    | 0.003     | 2    | 0.004     | 0    | 0.000     |
| J         | 57    | 0.009     | 7    | 0.021     | 9    | 0.019     | 1    | 0.003     |
| K         | 39    | 0.006     | 3    | 0.009     | 4    | 0.008     | 0    | 0.000     |
| L         | 5     | 0.001     | 2    | 0.006     | 0    | 0.000     | 0    | 0.000     |
| M         | 32    | 0.005     | 3    | 0.009     | 2    | 0.004     | 1    | 0.003     |
| N         | 3     | 0.001     | 1    | 0.003     | 0    | 0.000     | 2    | 0.007     |
| O         | 5     | 0.001     | 1    | 0.003     | 0    | 0.000     | 0    | 0.000     |
| P         | 69    | 0.010     | 8    | 0.024     | 5    | 0.010     | 4    | 0.014     |
| Q         | 20    | 0.003     | 1    | 0.003     | 2    | 0.004     | 0    | 0.000     |
| R         | 440   | 0.070     | 18   | 0.053     | 29   | 0.060     | 18   | 0.062     |
| S         | 380   | 0.060     | 6    | 0.018     | 22   | 0.045     | 12   | 0.041     |
| T         | 1     | 0.000     | 0    | 0.000     | 0    | 0.000     | 0    | 0.000     |
| U         | 19    | 0.003     | 0    | 0.000     | 0    | 0.000     | 3    | 0.010     |
| V         | 54    | 0.009     | 0    | 0.000     | 5    | 0.010     | 3    | 0.010     |
| W         | 4     | 0.001     | 0    | 0.000     | 0    | 0.000     | 2    | 0.007     |
| X         | 2     | 0.000     | 0    | 0.000     | 0    | 0.000     | 0    | 0.000     |
| Y         | 1     | 0.000     | 0    | 0.000     | 0    | 0.000     | 0    | 0.000     |
| Z         | 19    | 0.003     | 0    | 0.000     | 4    | 0.008     | 0    | 0.000     |
| AA        | 1     | 0.000     | 0    | 0.000     | 1    | 0.002     | 0    | 0.000     |
| BB        | 21    | 0.003     | 0    | 0.000     | 1    | 0.002     | 0    | 0.000     |
| CC        | 16    | 0.003     | 0    | 0.000     | 0    | 0.000     | 0    | 0.000     |
| DD        | 1     | 0.000     | 0    | 0.000     | 0    | 0.000     | 0    | 0.000     |
| EE        | 1     | 0.000     | 0    | 0.000     | 0    | 0.000     | 0    | 0.000     |
| FF        | 4     | 0.001     | 0    | 0.000     | 0    | 0.000     | 0    | 0.000     |
| GG        | 4     | 0.001     | 0    | 0.000     | 0    | 0.000     | 0    | 0.000     |
| HH        | 5     | 0.001     | 0    | 0.000     | 0    | 0.000     | 0    | 0.000     |
| II        | 1     | 0.000     | 0    | 0.000     | 0    | 0.000     | 0    | 0.000     |
|           | 6336  | 1.000     | 338  | 1.000     | 484  | 1.000     | 291  | 1.000     |

**Supplemental Table 1. Continued**

| Haplotype | 2000 |           | 2001 |           | 2002 |           | 2003 |           |
|-----------|------|-----------|------|-----------|------|-----------|------|-----------|
|           | #    | FREQUENCY | #    | FREQUENCY | #    | FREQUENCY | #    | FREQUENCY |
| A         | 20   | 0.055     | 5    | 0.022     | 14   | 0.041     | 21   | 0.057     |
| B         | 39   | 0.107     | 33   | 0.143     | 19   | 0.055     | 35   | 0.095     |
| C         | 4    | 0.011     | 0    | 0.000     | 6    | 0.017     | 8    | 0.022     |
| D         | 0    | 0.000     | 0    | 0.000     | 0    | 0.000     | 1    | 0.003     |
| E         | 229  | 0.626     | 136  | 0.591     | 237  | 0.689     | 214  | 0.578     |
| F         | 4    | 0.011     | 7    | 0.030     | 9    | 0.026     | 3    | 0.008     |
| G         | 3    | 0.008     | 0    | 0.000     | 1    | 0.003     | 4    | 0.011     |
| H         | 3    | 0.008     | 0    | 0.000     | 1    | 0.003     | 0    | 0.000     |
| I         | 0    | 0.000     | 0    | 0.000     | 0    | 0.000     | 1    | 0.003     |
| J         | 3    | 0.008     | 1    | 0.004     | 2    | 0.006     | 1    | 0.003     |
| K         | 0    | 0.000     | 3    | 0.013     | 1    | 0.003     | 4    | 0.011     |
| L         | 0    | 0.000     | 0    | 0.000     | 0    | 0.000     | 0    | 0.000     |
| M         | 8    | 0.022     | 1    | 0.004     | 2    | 0.006     | 2    | 0.005     |
| N         | 0    | 0.000     | 0    | 0.000     | 0    | 0.000     | 0    | 0.000     |
| O         | 0    | 0.000     | 2    | 0.009     | 0    | 0.000     | 0    | 0.000     |
| P         | 3    | 0.008     | 1    | 0.004     | 6    | 0.017     | 0    | 0.000     |
| Q         | 1    | 0.003     | 0    | 0.000     | 0    | 0.000     | 5    | 0.014     |
| R         | 17   | 0.046     | 11   | 0.048     | 22   | 0.064     | 30   | 0.081     |
| S         | 21   | 0.057     | 20   | 0.087     | 23   | 0.067     | 35   | 0.095     |
| T         | 1    | 0.003     | 0    | 0.000     | 0    | 0.000     | 0    | 0.000     |
| U         | 5    | 0.014     | 4    | 0.017     | 0    | 0.000     | 1    | 0.003     |
| V         | 4    | 0.011     | 5    | 0.022     | 1    | 0.003     | 2    | 0.005     |
| W         | 1    | 0.003     | 0    | 0.000     | 0    | 0.000     | 1    | 0.003     |
| X         | 0    | 0.000     | 0    | 0.000     | 0    | 0.000     | 2    | 0.005     |
| Y         | 0    | 0.000     | 1    | 0.004     | 0    | 0.000     | 0    | 0.000     |
| Z         | 0    | 0.000     | 0    | 0.000     | 0    | 0.000     | 0    | 0.000     |
| AA        | 0    | 0.000     | 0    | 0.000     | 0    | 0.000     | 0    | 0.000     |
| BB        | 0    | 0.000     | 0    | 0.000     | 0    | 0.000     | 0    | 0.000     |
| CC        | 0    | 0.000     | 0    | 0.000     | 0    | 0.000     | 0    | 0.000     |
| DD        | 0    | 0.000     | 0    | 0.000     | 0    | 0.000     | 0    | 0.000     |
| EE        | 0    | 0.000     | 0    | 0.000     | 0    | 0.000     | 0    | 0.000     |
| FF        | 0    | 0.000     | 0    | 0.000     | 0    | 0.000     | 0    | 0.000     |
| GG        | 0    | 0.000     | 0    | 0.000     | 0    | 0.000     | 0    | 0.000     |
| HH        | 0    | 0.000     | 0    | 0.000     | 0    | 0.000     | 0    | 0.000     |
| II        | 0    | 0.000     | 0    | 0.000     | 0    | 0.000     | 0    | 0.000     |
|           | 366  | 1.000     | 230  | 1.000     | 344  | 1.000     | 370  | 1.000     |

**Supplemental Table 1. Continued**

| Haplotype | 2004 |           | 2005 |           | 2006 |           | 2007 |           |
|-----------|------|-----------|------|-----------|------|-----------|------|-----------|
|           | #    | FREQUENCY | #    | FREQUENCY | #    | FREQUENCY | #    | FREQUENCY |
| A         | 31   | 0.055     | 32   | 0.073     | 20   | 0.035     | 14   | 0.045     |
| B         | 31   | 0.055     | 36   | 0.082     | 66   | 0.116     | 22   | 0.071     |
| C         | 13   | 0.023     | 3    | 0.007     | 8    | 0.014     | 10   | 0.032     |
| D         | 0    | 0.000     | 1    | 0.002     | 1    | 0.002     | 0    | 0.000     |
| E         | 358  | 0.640     | 267  | 0.611     | 344  | 0.602     | 178  | 0.578     |
| F         | 12   | 0.021     | 8    | 0.018     | 13   | 0.023     | 8    | 0.026     |
| G         | 3    | 0.005     | 2    | 0.005     | 4    | 0.007     | 1    | 0.003     |
| H         | 3    | 0.005     | 6    | 0.014     | 5    | 0.009     | 8    | 0.026     |
| I         | 1    | 0.002     | 2    | 0.005     | 0    | 0.000     | 1    | 0.003     |
| J         | 2    | 0.004     | 4    | 0.009     | 6    | 0.011     | 2    | 0.006     |
| K         | 2    | 0.004     | 4    | 0.009     | 3    | 0.005     | 3    | 0.010     |
| L         | 0    | 0.000     | 0    | 0.000     | 1    | 0.002     | 0    | 0.000     |
| M         | 0    | 0.000     | 1    | 0.002     | 3    | 0.005     | 2    | 0.006     |
| N         | 0    | 0.000     | 0    | 0.000     | 0    | 0.000     | 0    | 0.000     |
| O         | 0    | 0.000     | 0    | 0.000     | 0    | 0.000     | 1    | 0.003     |
| P         | 2    | 0.004     | 4    | 0.009     | 1    | 0.002     | 2    | 0.006     |
| Q         | 1    | 0.002     | 0    | 0.000     | 0    | 0.000     | 1    | 0.003     |
| R         | 48   | 0.086     | 33   | 0.076     | 45   | 0.079     | 20   | 0.065     |
| S         | 33   | 0.059     | 25   | 0.057     | 26   | 0.046     | 30   | 0.097     |
| T         | 0    | 0.000     | 0    | 0.000     | 0    | 0.000     | 0    | 0.000     |
| U         | 1    | 0.002     | 0    | 0.000     | 0    | 0.000     | 1    | 0.003     |
| V         | 14   | 0.025     | 6    | 0.014     | 3    | 0.005     | 0    | 0.000     |
| W         | 0    | 0.000     | 0    | 0.000     | 0    | 0.000     | 0    | 0.000     |
| X         | 0    | 0.000     | 0    | 0.000     | 0    | 0.000     | 0    | 0.000     |
| Y         | 0    | 0.000     | 0    | 0.000     | 0    | 0.000     | 0    | 0.000     |
| Z         | 1    | 0.002     | 1    | 0.002     | 2    | 0.004     | 0    | 0.000     |
| AA        | 0    | 0.000     | 0    | 0.000     | 0    | 0.000     | 0    | 0.000     |
| BB        | 0    | 0.000     | 1    | 0.002     | 6    | 0.011     | 2    | 0.006     |
| CC        | 2    | 0.004     | 1    | 0.002     | 8    | 0.014     | 1    | 0.003     |
| DD        | 1    | 0.002     | 0    | 0.000     | 0    | 0.000     | 0    | 0.000     |
| EE        | 0    | 0.000     | 0    | 0.000     | 1    | 0.002     | 0    | 0.000     |
| FF        | 0    | 0.000     | 0    | 0.000     | 3    | 0.005     | 1    | 0.003     |
| GG        | 0    | 0.000     | 0    | 0.000     | 2    | 0.004     | 0    | 0.000     |
| HH        | 0    | 0.000     | 0    | 0.000     | 0    | 0.000     | 0    | 0.000     |
| II        | 0    | 0.000     | 0    | 0.000     | 0    | 0.000     | 0    | 0.000     |
|           | 559  | 1.000     | 437  | 1.000     | 571  | 1.000     | 308  | 1.000     |

**Supplemental Table 1. Continued**

| Haplotype | 2008 |           | 2009 |           | 2010 |           | 2011 |           |
|-----------|------|-----------|------|-----------|------|-----------|------|-----------|
|           | #    | FREQUENCY | #    | FREQUENCY | #    | FREQUENCY | #    | FREQUENCY |
| A         | 42   | 0.070     | 30   | 0.058     | 15   | 0.031     | 20   | 0.043     |
| B         | 28   | 0.048     | 60   | 0.117     | 37   | 0.077     | 32   | 0.068     |
| C         | 13   | 0.022     | 8    | 0.016     | 18   | 0.038     | 13   | 0.028     |
| D         | 2    | 0.003     | 0    | 0.000     | 0    | 0.000     | 0    | 0.000     |
| E         | 358  | 0.625     | 270  | 0.524     | 301  | 0.630     | 290  | 0.618     |
| F         | 10   | 0.017     | 9    | 0.017     | 8    | 0.017     | 7    | 0.015     |
| G         | 3    | 0.005     | 15   | 0.029     | 4    | 0.008     | 5    | 0.011     |
| H         | 5    | 0.008     | 2    | 0.004     | 9    | 0.019     | 1    | 0.002     |
| I         | 2    | 0.003     | 6    | 0.012     | 1    | 0.002     | 6    | 0.013     |
| J         | 6    | 0.012     | 4    | 0.008     | 5    | 0.010     | 4    | 0.009     |
| K         | 4    | 0.007     | 4    | 0.008     | 0    | 0.000     | 4    | 0.009     |
| L         | 0    | 0.000     | 2    | 0.004     | 0    | 0.000     | 0    | 0.000     |
| M         | 0    | 0.000     | 1    | 0.002     | 1    | 0.002     | 5    | 0.011     |
| N         | 0    | 0.000     | 0    | 0.000     | 0    | 0.000     | 0    | 0.000     |
| O         | 1    | 0.002     | 0    | 0.000     | 0    | 0.000     | 0    | 0.000     |
| P         | 12   | 0.020     | 6    | 0.012     | 2    | 0.004     | 13   | 0.028     |
| Q         | 0    | 0.000     | 2    | 0.004     | 5    | 0.010     | 2    | 0.004     |
| R         | 38   | 0.070     | 48   | 0.093     | 33   | 0.069     | 30   | 0.064     |
| S         | 39   | 0.066     | 36   | 0.070     | 27   | 0.056     | 25   | 0.053     |
| T         | 0    | 0.000     | 0    | 0.000     | 0    | 0.000     | 0    | 0.000     |
| U         | 1    | 0.002     | 0    | 0.000     | 0    | 0.000     | 3    | 0.006     |
| V         | 5    | 0.008     | 1    | 0.002     | 2    | 0.004     | 3    | 0.006     |
| W         | 0    | 0.000     | 0    | 0.000     | 0    | 0.000     | 0    | 0.000     |
| X         | 0    | 0.000     | 0    | 0.000     | 0    | 0.000     | 0    | 0.000     |
| Y         | 0    | 0.000     | 0    | 0.000     | 0    | 0.000     | 0    | 0.000     |
| Z         | 3    | 0.005     | 8    | 0.016     | 0    | 0.000     | 0    | 0.000     |
| AA        | 0    | 0.000     | 0    | 0.000     | 0    | 0.000     | 0    | 0.000     |
| BB        | 2    | 0.003     | 2    | 0.004     | 5    | 0.010     | 2    | 0.004     |
| CC        | 0    | 0.002     | 1    | 0.002     | 1    | 0.002     | 2    | 0.004     |
| DD        | 0    | 0.000     | 0    | 0.000     | 0    | 0.000     | 0    | 0.000     |
| EE        | 0    | 0.000     | 0    | 0.000     | 0    | 0.000     | 0    | 0.000     |
| FF        | 0    | 0.000     | 0    | 0.000     | 0    | 0.000     | 0    | 0.000     |
| GG        | 0    | 0.000     | 0    | 0.000     | 2    | 0.004     | 0    | 0.000     |
| HH        | 2    | 0.003     | 0    | 0.000     | 2    | 0.004     | 1    | 0.002     |
| II        | 0    | 0.000     | 0    | 0.000     | 0    | 0.000     | 1    | 0.002     |
|           | 576  | 1.000     | 515  | 1.000     | 478  | 1.000     | 469  | 1.000     |

**Supplemental Table 2.** MtDNA haplotypes for each individual. Collection # provides the abbreviated locality information and sample number. Sample # indicates the laboratory assigned identification.

| Collection # | Sample #  | Haplotype | Collection # | Sample #  | Haplotype |
|--------------|-----------|-----------|--------------|-----------|-----------|
| NM13097.02   | RBL97.002 | S         | TC3705.21    | RBL05.230 | E         |
| NM13097.03   | RBL97.003 | J         | TC3705.22    | RBL05.231 | E         |
| NM13097.04   | RBL97.004 | B         | TC3705.23    | RBL05.232 | E         |
| NM13097.05   | RBL97.005 | E         | TC3705.24    | RBL05.233 | E         |
| NM13097.06   | RBL97.006 | E         | TC3705.25    | RBL05.234 | E         |
| NM13097.07   | RBL97.007 | E         | TC3705.26    | RBL05.235 | E         |
| NM13097.08   | RBL97.008 | K         | TC3705.27    | RBL05.236 | E         |
| NM13097.09   | RBL97.009 | F         | TC3705.28    | RBL05.237 | E         |
| NM13097.10   | RBL97.010 | E         | TC32105.01   | RBL05.238 | E         |
| NM13097.11   | RBL97.011 | E         | TC32105.02   | RBL05.239 | E         |
| NM13097.12   | RBL97.012 | E         | TC32105.03   | RBL05.240 | A         |
| NM13097.13   | RBL97.013 | F         | TC32105.04   | RBL05.241 | E         |
| NM13097.14   | RBL97.014 | E         | TC32105.05   | RBL05.242 | E         |
| NM13097.15   | RBL97.015 | E         | TC32105.06   | RBL05.243 | E         |
| NM13097.16   | RBL97.016 | F         | TC32105.07   | RBL05.244 | E         |
| NM13097.17   | RBL97.017 | E         | TC32105.08   | RBL05.245 | E         |
| NM13097.18   | RBL97.018 | E         | TC32105.09   | RBL05.246 | E         |
| NM13097.19   | RBL97.019 | E         | TC32105.10   | RBL05.247 | E         |
| NM13097.20   | RBL97.020 | F         | TC32105.11   | RBL05.248 | A         |
| NM13097.21   | RBL97.021 | F         | TC32105.12   | RBL05.249 | A         |
| NM13097.22   | RBL97.022 | J         | TC32105.13   | RBL05.250 | J         |
| NM13097.23   | RBL97.023 | E         | TC32105.14   | RBL05.251 | A         |
| NM13097.26   | RBL97.026 | E         | TC32105.15   | RBL05.252 | C         |
| HH3197.01    | RBL97.027 | E         | TC32105.16   | RBL05.253 | E         |
| HH3197.02    | RBL97.028 | E         | TC32105.17   | RBL05.254 | H         |
| HH3197.03    | RBL97.029 | E         | TC32105.18   | RBL05.255 | S         |
| HH3197.04    | RBL97.030 | B         | TC32105.19   | RBL05.256 | E         |
| HH3197.05    | RBL97.031 | B         | TC32105.20   | RBL05.257 | E         |
| HH3197.06    | RBL97.032 | E         | TC32105.21   | RBL05.258 | J         |
| HH3197.07    | RBL97.033 | B         | TC32105.22   | RBL05.259 | E         |
| HH3197.08    | RBL97.034 | K         | TC32105.23   | RBL05.260 | E         |
| HH3197.09    | RBL97.035 | C         | TC32105.24   | RBL05.261 | CC        |
| HH3197.10    | RBL97.036 | B         | TC32105.25   | RBL05.262 | J         |
| HH3197.11    | RBL97.037 | E         | TC32105.26   | RBL05.263 | E         |
| HH3197.12    | RBL97.038 | E         | TC4505.01    | RBL05.264 | R         |
| HH3197.13    | RBL97.039 | E         | TC4505.02    | RBL05.265 | E         |

|            |           |   |            |           |   |
|------------|-----------|---|------------|-----------|---|
| HH3197.14  | RBL97.040 | B | TC4505.03  | RBL05.266 | E |
| HH3197.15  | RBL97.041 | E | TC4505.04  | RBL05.267 | E |
| HH3197.16  | RBL97.042 | A | TC4505.05  | RBL05.268 | E |
| HH3197.17  | RBL97.043 | E | TC4505.06  | RBL05.269 | R |
| HH3197.18  | RBL97.044 | B | TC4505.07  | RBL05.270 | E |
| HH3197.19  | RBL97.045 | B | TC4505.08  | RBL05.271 | E |
| HH3197.20  | RBL97.046 | E | TC4505.09  | RBL05.272 | E |
| HH3197.21  | RBL97.047 | E | TC4505.10  | RBL05.273 | R |
| HH3197.22  | RBL97.048 | R | TC4505.11  | RBL05.274 | E |
| HH3197.23  | RBL97.049 | E | TC4505.12  | RBL05.275 | E |
| HH3197.24  | RBL97.050 | E | TC4505.13  | RBL05.276 | E |
| HH3197.25  | RBL97.051 | B | TC4505.14  | RBL05.277 | E |
| HH3197.26  | RBL97.052 | E | TC4505.15  | RBL05.278 | R |
| HH3197.27  | RBL97.053 | E | TC4505.16  | RBL05.279 | E |
| HH3197.28  | RBL97.054 | E | TC4505.17  | RBL05.280 | E |
| HH3197.29  | RBL97.055 | E | TC4505.18  | RBL05.281 | P |
| HH3197.30  | RBL97.056 | E | TC4505.19  | RBL05.282 | E |
| HF32997.01 | RBL97.057 | E | TC4505.20  | RBL05.283 | E |
| HF32997.02 | RBL97.058 | B | TC4505.21  | RBL05.284 | E |
| HF32997.03 | RBL97.059 | S | TC4505.22  | RBL05.285 | E |
| HF32997.04 | RBL97.060 | F | TC4505.24  | RBL05.287 | E |
| HF32997.05 | RBL97.061 | B | TC4505.25  | RBL05.288 | E |
| HF32997.06 | RBL97.062 | E | YC12505.01 | RBL05.289 | R |
| HF32997.07 | RBL97.063 | E | YC12505.02 | RBL05.290 | E |
| HF32997.08 | RBL97.064 | E | YC12505.03 | RBL05.291 | E |
| HF32997.09 | RBL97.065 | P | YC12505.04 | RBL05.292 | E |
| HF32997.10 | RBL97.066 | E | YC12505.05 | RBL05.293 | R |
| HF32997.11 | RBL97.067 | E | YC12505.06 | RBL05.294 | E |
| HF32997.12 | RBL97.068 | L | YC12505.07 | RBL05.295 | S |
| HF32997.13 | RBL97.069 | E | YC12505.08 | RBL05.296 | E |
| HF32997.14 | RBL97.070 | E | YC12505.09 | RBL05.297 | E |
| HF32997.15 | RBL97.071 | E | YC12505.10 | RBL05.298 | E |
| HF32997.16 | RBL97.072 | S | YC12505.11 | RBL05.299 | E |
| HF32997.17 | RBL97.073 | E | YC12505.12 | RBL05.300 | B |
| HF32997.18 | RBL97.074 | E | YC12505.13 | RBL05.301 | B |
| HF32997.19 | RBL97.075 | C | YC12505.14 | RBL05.302 | H |
| HF32997.20 | RBL97.076 | E | YC12505.15 | RBL05.303 | E |
| HF32997.21 | RBL97.077 | E | YC12505.16 | RBL05.304 | E |
| HF32997.22 | RBL97.078 | C | YC12505.17 | RBL05.305 | B |
| HF32997.23 | RBL97.079 | F | YC12505.18 | RBL05.306 | F |
| HF32997.24 | RBL97.080 | E | YC12505.19 | RBL05.307 | E |

|            |           |   |            |           |   |
|------------|-----------|---|------------|-----------|---|
| HF32997.25 | RBL97.081 | E | YC12505.20 | RBL05.308 | E |
| HF32997.26 | RBL97.082 | E | YC12505.21 | RBL05.309 | E |
| HF32997.27 | RBL97.083 | S | YC12505.22 | RBL05.310 | B |
| HF32997.28 | RBL97.084 | E | YC12505.23 | RBL05.311 | B |
| HF32997.29 | RBL97.085 | F | YC12505.24 | RBL05.312 | E |
| HF32997.30 | RBL97.086 | E | YC12505.25 | RBL05.313 | J |
| TC12897.01 | RBL97.087 | E | YC12505.26 | RBL05.314 | B |
| TC12897.02 | RBL97.088 | E | YC2805.01  | RBL05.315 | E |
| TC12897.03 | RBL97.089 | F | YC2805.02  | RBL05.316 | B |
| TC12897.06 | RBL97.092 | E | YC2805.03  | RBL05.317 | E |
| TC12897.08 | RBL97.094 | E | YC2805.04  | RBL05.318 | E |
| TC12897.09 | RBL97.095 | F | YC2805.05  | RBL05.319 | E |
| TC12897.10 | RBL97.096 | E | YC2805.06  | RBL05.320 | S |
| TC12897.12 | RBL97.098 | J | YC2805.07  | RBL05.321 | B |
| TC12897.13 | RBL97.099 | E | YC2805.08  | RBL05.322 | R |
| TC12897.15 | RBL97.101 | E | YC2805.09  | RBL05.323 | B |
| TC12897.16 | RBL97.102 | F | YC2805.10  | RBL05.324 | E |
| TC12897.18 | RBL97.104 | K | YC2805.11  | RBL05.325 | E |
| TC12897.19 | RBL97.105 | E | YC2805.12  | RBL05.326 | E |
| TC12897.20 | RBL97.106 | J | YC2805.13  | RBL05.327 | E |
| TC12897.21 | RBL97.107 | E | YC2805.14  | RBL05.328 | S |
| TC12897.22 | RBL97.108 | E | YC2805.15  | RBL05.329 | E |
| TC12897.23 | RBL97.109 | F | YC2805.16  | RBL05.330 | E |
| TC3197.01  | RBL97.110 | E | YC2805.17  | RBL05.331 | S |
| TC3197.02  | RBL97.111 | H | YC2805.18  | RBL05.332 | B |
| TC3197.03  | RBL97.112 | E | YC2805.19  | RBL05.333 | E |
| TC3197.04  | RBL97.113 | E | YC2805.20  | RBL05.334 | B |
| TC3197.05  | RBL97.114 | E | YC2805.21  | RBL05.335 | E |
| TC3197.06  | RBL97.115 | E | YC2805.22  | RBL05.336 | E |
| TC3197.07  | RBL97.116 | E | YC2805.23  | RBL05.337 | E |
| TC3197.08  | RBL97.117 | E | YC2805.24  | RBL05.338 | B |
| TC3197.09  | RBL97.118 | E | YC2805.25  | RBL05.339 | E |
| TC3197.10  | RBL97.119 | E | YC2805.26  | RBL05.340 | B |
| TC3197.11  | RBL97.120 | E | YC22305.01 | RBL05.341 | P |
| TC3197.12  | RBL97.121 | E | YC22305.02 | RBL05.342 | B |
| TC3197.13  | RBL97.122 | B | YC22305.03 | RBL05.343 | E |
| TC3197.14  | RBL97.123 | R | YC22305.04 | RBL05.344 | E |
| TC3197.15  | RBL97.124 | P | YC22305.05 | RBL05.345 | E |
| TC3197.16  | RBL97.125 | E | YC22305.06 | RBL05.346 | E |
| TC3197.17  | RBL97.126 | E | YC22305.07 | RBL05.347 | B |
| TC3197.18  | RBL97.127 | E | YC22305.08 | RBL05.348 | E |

|            |           |   |            |           |   |
|------------|-----------|---|------------|-----------|---|
| TC3197.19  | RBL97.128 | R | YC22305.09 | RBL05.349 | E |
| TC3197.20  | RBL97.129 | E | YC22305.10 | RBL05.350 | E |
| TC3197.21  | RBL97.130 | R | YC22305.11 | RBL05.351 | E |
| TC3197.22  | RBL97.131 | O | YC22305.12 | RBL05.352 | E |
| TC3197.23  | RBL97.132 | A | YC22305.13 | RBL05.353 | E |
| TC3197.24  | RBL97.133 | E | YC22305.14 | RBL05.354 | E |
| TC3197.25  | RBL97.134 | B | YC22305.15 | RBL05.355 | K |
| TC3197.26  | RBL97.135 | S | YC22305.16 | RBL05.356 | R |
| TC3197.27  | RBL97.136 | E | YC22305.17 | RBL05.357 | E |
| TC3197.28  | RBL97.137 | B | YC22305.18 | RBL05.358 | E |
| TC3197.29  | RBL97.138 | E | YC22305.19 | RBL05.359 | B |
| TC3197.30  | RBL97.139 | E | YC22305.20 | RBL05.360 | F |
| TC3197.31  | RBL97.140 | E | YC22305.21 | RBL05.361 | E |
| TC32997.01 | RBL97.141 | R | YC22305.22 | RBL05.362 | E |
| TC32997.02 | RBL97.142 | E | YC22305.23 | RBL05.363 | E |
| TC32997.03 | RBL97.143 | E | YC22305.24 | RBL05.364 | V |
| TC32997.04 | RBL97.144 | B | YC22305.25 | RBL05.365 | R |
| TC32997.05 | RBL97.145 | E | YC3805.01  | RBL05.366 | E |
| TC32997.06 | RBL97.146 | E | YC3805.02  | RBL05.367 | R |
| TC32997.07 | RBL97.147 | R | YC3805.03  | RBL05.368 | A |
| TC32997.08 | RBL97.148 | E | YC3805.04  | RBL05.369 | R |
| TC32997.09 | RBL97.149 | C | YC3805.05  | RBL05.370 | R |
| TC32997.10 | RBL97.150 | C | YC3805.06  | RBL05.371 | E |
| TC32997.11 | RBL97.151 | E | YC3805.07  | RBL05.372 | A |
| TC32997.12 | RBL97.152 | E | YC3805.08  | RBL05.373 | R |
| TC32997.14 | RBL97.154 | E | YC3805.09  | RBL05.374 | A |
| TC32997.15 | RBL97.155 | C | YC3805.10  | RBL05.375 | F |
| TC32997.16 | RBL97.156 | E | YC3805.11  | RBL05.376 | E |
| TC32997.17 | RBL97.157 | R | YC3805.12  | RBL05.377 | E |
| TC32997.19 | RBL97.159 | R | YC3805.13  | RBL05.378 | E |
| TC32997.20 | RBL97.160 | E | YC3805.14  | RBL05.379 | B |
| TC32997.21 | RBL97.161 | R | YC3805.15  | RBL05.380 | E |
| TC32997.22 | RBL97.162 | R | YC3805.16  | RBL05.381 | E |
| TC32997.23 | RBL97.163 | E | YC3805.17  | RBL05.382 | R |
| TC32997.24 | RBL97.164 | N | YC3805.18  | RBL05.383 | E |
| TC32997.25 | RBL97.165 | E | YC3805.19  | RBL05.384 | E |
| TC32997.26 | RBL97.166 | E | YC3805.20  | RBL05.385 | E |
| TC32997.27 | RBL97.167 | C | YC3805.21  | RBL05.386 | E |
| TC32997.28 | RBL97.168 | E | YC3805.22  | RBL05.387 | E |
| TC32997.29 | RBL97.169 | C | YC3805.23  | RBL05.388 | E |
| TC32997.30 | RBL97.170 | E | YC3805.24  | RBL05.389 | B |



|             |           |   |            |           |   |
|-------------|-----------|---|------------|-----------|---|
| RTC33197.01 | RBL97.171 | E | YC3805.25  | RBL05.390 | E |
| RTC33197.02 | RBL97.172 | E | YC32205.01 | RBL05.391 | E |
| RTC33197.03 | RBL97.173 | E | YC32205.02 | RBL05.392 | E |
| RTC33197.04 | RBL97.174 | E | YC32205.03 | RBL05.393 | E |
| RTC33197.05 | RBL97.175 | P | YC32205.04 | RBL05.394 | E |
| RTC33197.07 | RBL97.177 | E | YC32205.05 | RBL05.395 | R |
| RTC33197.08 | RBL97.178 | E | YC32205.06 | RBL05.396 | A |
| RTC33197.09 | RBL97.179 | E | YC32205.07 | RBL05.397 | V |
| RTC33197.10 | RBL97.180 | E | YC32205.08 | RBL05.398 | E |
| RTC33197.11 | RBL97.181 | E | YC32205.09 | RBL05.399 | E |
| RTC33197.12 | RBL97.182 | P | YC32205.10 | RBL05.400 | E |
| RTC33197.14 | RBL97.184 | M | YC32205.11 | RBL05.401 | E |
| RTC33197.15 | RBL97.185 | B | YC32205.12 | RBL05.402 | A |
| RTC33197.16 | RBL97.186 | M | YC32205.13 | RBL05.403 | H |
| RTC33197.17 | RBL97.187 | A | YC32205.14 | RBL05.404 | E |
| RTC33197.18 | RBL97.188 | E | YC32205.15 | RBL05.405 | E |
| RTC33197.19 | RBL97.189 | E | YC32205.16 | RBL05.406 | A |
| RTC33197.21 | RBL97.191 | P | YC32205.17 | RBL05.407 | V |
| RTC33197.23 | RBL97.193 | M | YC32205.18 | RBL05.408 | R |
| RTC33197.24 | RBL97.194 | E | YC32205.19 | RBL05.409 | R |
| RTC33197.25 | RBL97.195 | E | YC32205.20 | RBL05.410 | E |
| RTC33197.26 | RBL97.196 | A | YC32205.21 | RBL05.411 | E |
| RTC33197.27 | RBL97.197 | P | YC32205.22 | RBL05.412 | E |
| RTC33197.28 | RBL97.198 | E | YC32205.23 | RBL05.413 | B |
| RTC33197.29 | RBL97.199 | E | YC32205.24 | RBL05.414 | R |
| RTC33197.30 | RBL97.200 | P | YC32205.25 | RBL05.415 | E |
| RTC33197.31 | RBL97.201 | E | YC4505.01  | RBL05.416 | E |
| WC32497.02  | RBL97.203 | J | YC4505.02  | RBL05.417 | E |
| WC32497.03  | RBL97.204 | B | YC4505.03  | RBL05.418 | M |
| WC32497.04  | RBL97.205 | B | YC4505.04  | RBL05.419 | E |
| WC32497.05  | RBL97.206 | B | YC4505.05  | RBL05.420 | A |
| WC32497.06  | RBL97.207 | B | YC4505.06  | RBL05.421 | E |
| WC32497.07  | RBL97.208 | E | YC4505.07  | RBL05.422 | E |
| WC32497.08  | RBL97.209 | B | YC4505.08  | RBL05.423 | E |
| WC32497.10  | RBL97.211 | B | YC4505.09  | RBL05.424 | E |
| WC32497.11  | RBL97.212 | B | YC4505.10  | RBL05.425 | A |
| WC32497.12  | RBL97.213 | B | YC4505.11  | RBL05.426 | A |
| WC32497.13  | RBL97.214 | B | YC4505.12  | RBL05.427 | A |
| WC32497.14  | RBL97.215 | E | YC4505.13  | RBL05.428 | E |
| WC32497.15  | RBL97.216 | J | YC4505.14  | RBL05.429 | F |
| WC32497.17  | RBL97.218 | B | YC4505.15  | RBL05.430 | E |

|            |           |   |             |           |    |
|------------|-----------|---|-------------|-----------|----|
| WC32497.18 | RBL97.219 | B | YC4505.16   | RBL05.431 | E  |
| WC32497.19 | RBL97.220 | B | YC4505.17   | RBL05.432 | R  |
| WC32497.20 | RBL97.221 | J | YC4505.18   | RBL05.433 | E  |
| WC32497.22 | RBL97.223 | B | YC4505.20   | RBL05.435 | S  |
| WC32497.23 | RBL97.224 | R | YC4505.21   | RBL05.436 | A  |
| WC32497.24 | RBL97.225 | B | YC4505.22   | RBL05.437 | E  |
| WC32497.25 | RBL97.226 | B | YC4505.23   | RBL05.438 | E  |
| WC4197.01  | RBL97.227 | E | YC4505.24   | RBL05.439 | E  |
| WC4197.02  | RBL97.228 | E | YC4505.25   | RBL05.440 | E  |
| WC4197.03  | RBL97.229 | E | RT032206.01 | RBL06.028 | E  |
| WC4197.05  | RBL97.231 | E | RT032206.02 | RBL06.029 | E  |
| WC4197.06  | RBL97.232 | E | RT032206.03 | RBL06.030 | E  |
| WC4197.07  | RBL97.233 | E | RT032206.04 | RBL06.031 | E  |
| WC4197.08  | RBL97.234 | E | RT032206.05 | RBL06.032 | J  |
| WC4197.09  | RBL97.235 | E | RT032206.06 | RBL06.033 | EE |
| WC4197.11  | RBL97.237 | E | RT032206.07 | RBL06.034 | E  |
| WC4197.12  | RBL97.238 | E | RT032206.08 | RBL06.035 | E  |
| WC4197.13  | RBL97.239 | E | RT032206.09 | RBL06.036 | E  |
| WC4197.15  | RBL97.241 | E | RT032206.10 | RBL06.037 | S  |
| WC4197.17  | RBL97.243 | E | RT032206.11 | RBL06.038 | E  |
| WC4197.18  | RBL97.244 | R | RT032206.12 | RBL06.039 | E  |
| WC4197.19  | RBL97.245 | E | RT032206.13 | RBL06.040 | B  |
| WC4197.20  | RBL97.246 | B | RT032206.14 | RBL06.041 | E  |
| WC4197.21  | RBL97.247 | E | RT032206.15 | RBL06.042 | B  |
| WC4197.22  | RBL97.248 | B | RT032206.16 | RBL06.043 | E  |
| WC4197.23  | RBL97.249 | B | RT032206.17 | RBL06.044 | R  |
| WC4197.24  | RBL97.250 | A | RT032206.18 | RBL06.045 | B  |
| WC4197.25  | RBL97.251 | E | RT032206.19 | RBL06.046 | E  |
| WC4197.26  | RBL97.252 | E | RT032206.20 | RBL06.047 | E  |
| WC4197.27  | RBL97.253 | E | RT032206.21 | RBL06.048 | E  |
| WC4197.28  | RBL97.254 | E | RT032206.22 | RBL06.049 | E  |
| WC4197.29  | RBL97.255 | C | RT032206.23 | RBL06.050 | B  |
| WC4197.30  | RBL97.256 | C | RT032206.24 | RBL06.051 | S  |
| YC2397.01  | RBL97.257 | R | HH020706.01 | RBL06.052 | E  |
| YC2397.02  | RBL97.258 | E | HH020706.02 | RBL06.053 | G  |
| YC2397.04  | RBL97.260 | S | HH020706.03 | RBL06.054 | E  |
| YC2397.05  | RBL97.261 | B | HH020706.04 | RBL06.055 | CC |
| YC2397.06  | RBL97.262 | C | HH020706.05 | RBL06.056 | E  |
| YC2397.09  | RBL97.265 | A | HH020706.06 | RBL06.057 | B  |
| YC2397.10  | RBL97.266 | A | HH020706.07 | RBL06.058 | E  |
| YC2397.11  | RBL97.267 | E | HH020706.08 | RBL06.059 | R  |

|            |           |   |             |           |   |
|------------|-----------|---|-------------|-----------|---|
| YC2397.12  | RBL97.268 | E | HH020706.09 | RBL06.060 | E |
| YC2397.13  | RBL97.269 | C | HH020706.10 | RBL06.061 | f |
| YC2397.15  | RBL97.271 | H | HH020706.11 | RBL06.062 | C |
| YC2397.17  | RBL97.273 | B | HH020706.12 | RBL06.063 | G |
| YC2397.19  | RBL97.275 | B | HH020706.13 | RBL06.064 | F |
| YC2397.21  | RBL97.277 | E | HH020706.14 | RBL06.065 | F |
| YC2397.22  | RBL97.278 | E | HH020706.15 | RBL06.066 | E |
| YC2397.23  | RBL97.279 | E | HH020706.16 | RBL06.067 | G |
| YC2397.24  | RBL97.280 | E | HH020706.17 | RBL06.068 | G |
| YC22897.01 | RBL97.282 | C | HH020706.18 | RBL06.069 | E |
| YC22897.02 | RBL97.283 | E | HH020706.19 | RBL06.070 | H |
| YC22897.03 | RBL97.284 | R | HH020706.20 | RBL06.071 | E |
| YC22897.04 | RBL97.285 | B | HH020706.21 | RBL06.072 | E |
| YC22897.05 | RBL97.286 | B | HH020706.22 | RBL06.073 | H |
| YC22897.06 | RBL97.287 | E | HH020706.23 | RBL06.074 | H |
| YC22897.08 | RBL97.289 | C | HH020706.24 | RBL06.075 | H |
| YC22897.09 | RBL97.290 | R | HH020706.25 | RBL06.076 | A |
| YC22897.10 | RBL97.291 | E | HH022306.01 | RBL06.077 | A |
| YC22897.11 | RBL97.292 | E | HH022306.02 | RBL06.078 | E |
| YC22897.13 | RBL97.294 | C | HH022306.03 | RBL06.079 | E |
| YC22897.14 | RBL97.295 | B | HH022306.04 | RBL06.080 | E |
| YC22897.15 | RBL97.296 | B | HH022306.05 | RBL06.081 | E |
| YC22897.16 | RBL97.297 | E | HH022306.06 | RBL06.082 | M |
| YC22897.17 | RBL97.298 | E | HH022306.07 | RBL06.083 | F |
| YC22897.18 | RBL97.299 | A | HH022306.08 | RBL06.084 | E |
| YC22897.19 | RBL97.300 | R | HH022306.09 | RBL06.085 | R |
| YC22897.20 | RBL97.301 | Q | HH022306.10 | RBL06.086 | R |
| YC22897.21 | RBL97.302 | E | HH022306.11 | RBL06.087 | E |
| YC22897.22 | RBL97.303 | E | HH022306.12 | RBL06.088 | E |
| YC22897.23 | RBL97.304 | A | HH022306.13 | RBL06.089 | S |
| YC22897.24 | RBL97.305 | E | HH022306.14 | RBL06.090 | E |
| YC22897.25 | RBL97.306 | E | HH022306.15 | RBL06.091 | B |
| YC22897.26 | RBL97.307 | E | HH022306.16 | RBL06.092 | B |
| YC22897.27 | RBL97.308 | E | HH022306.17 | RBL06.093 | E |
| YC22897.28 | RBL97.309 | E | HH022306.18 | RBL06.094 | E |
| YC22897.29 | RBL97.310 | C | HH022306.19 | RBL06.095 | B |
| YC22897.30 | RBL97.311 | E | HH022306.20 | RBL06.096 | E |
| YC22897.31 | RBL97.312 | B | HH022306.21 | RBL06.097 | Z |
| YC32997.01 | RBL97.313 | E | HH022306.22 | RBL06.098 | B |
| YC32997.02 | RBL97.314 | E | HH022306.23 | RBL06.099 | B |
| YC32997.03 | RBL97.315 | E | HH022306.24 | RBL06.100 | E |

|            |           |   |             |           |    |
|------------|-----------|---|-------------|-----------|----|
| YC32997.04 | RBL97.316 | C | HH022306.25 | RBL06.101 | B  |
| YC32997.05 | RBL97.317 | E | HF030706.01 | RBL06.102 | E  |
| YC32997.06 | RBL97.318 | E | HF030706.02 | RBL06.103 | E  |
| YC32997.07 | RBL97.319 | E | HF030706.03 | RBL06.104 | S  |
| YC32997.08 | RBL97.320 | E | HF030706.04 | RBL06.105 | E  |
| YC32997.09 | RBL97.321 | B | HF030706.05 | RBL06.106 | E  |
| YC32997.10 | RBL97.322 | E | HF030706.06 | RBL06.107 | E  |
| YC32997.11 | RBL97.323 | E | HF030706.07 | RBL06.108 | A  |
| YC32997.12 | RBL97.324 | E | HF030706.08 | RBL06.109 | E  |
| YC32997.13 | RBL97.325 | E | HF030706.09 | RBL06.110 | FF |
| YC32997.14 | RBL97.326 | E | HF030706.10 | RBL06.111 | E  |
| YC32997.15 | RBL97.327 | E | HF030706.11 | RBL06.112 | E  |
| YC32997.16 | RBL97.328 | E | HF030706.12 | RBL06.113 | FF |
| YC32997.17 | RBL97.329 | E | HF030706.13 | RBL06.114 | E  |
| YC32997.18 | RBL97.330 | E | HF030706.14 | RBL06.115 | E  |
| YC32997.19 | RBL97.331 | E | HF030706.15 | RBL06.116 | E  |
| YC32997.20 | RBL97.332 | E | HF030706.16 | RBL06.117 | E  |
| YC32997.21 | RBL97.333 | E | HF030706.17 | RBL06.118 | E  |
| YC32997.22 | RBL97.334 | E | HF030706.18 | RBL06.119 | B  |
| YC32997.23 | RBL97.335 | E | HF030706.19 | RBL06.120 | E  |
| YC32997.24 | RBL97.336 | R | HF030706.20 | RBL06.121 | E  |
| YC32997.25 | RBL97.337 | G | HF030706.21 | RBL06.122 | FF |
| YC32997.26 | RBL97.338 | C | HF030706.22 | RBL06.123 | E  |
| YC32997.27 | RBL97.339 | B | HF030706.23 | RBL06.124 | E  |
| YC32997.28 | RBL97.340 | E | HF030706.24 | RBL06.125 | E  |
| YC32997.29 | RBL97.341 | E | HF030706.25 | RBL06.126 | S  |
| YC32997.30 | RBL97.342 | E | NM031506.01 | RBL06.127 | E  |
| LC32997.01 | RBL97.343 | E | NM031506.02 | RBL06.128 | E  |
| LC32997.02 | RBL97.344 | E | NM031506.03 | RBL06.129 | E  |
| LC32997.03 | RBL97.345 | E | NM031506.04 | RBL06.130 | E  |
| LC32997.04 | RBL97.346 | E | NM031506.05 | RBL06.131 | E  |
| LC32997.05 | RBL97.347 | E | NM031506.06 | RBL06.132 | E  |
| LC32997.06 | RBL97.348 | B | NM031506.07 | RBL06.133 | E  |
| LC32997.07 | RBL97.349 | E | NM031506.08 | RBL06.134 | E  |
| LC32997.08 | RBL97.350 | E | NM031506.09 | RBL06.135 | E  |
| LC32997.09 | RBL97.351 | E | NM031506.10 | RBL06.136 | E  |
| LC32997.10 | RBL97.352 | E | NM031506.11 | RBL06.137 | S  |
| LC32997.11 | RBL97.353 | E | NM031506.12 | RBL06.138 | E  |
| LC32997.12 | RBL97.354 | B | NM031506.13 | RBL06.139 | R  |
| LC32997.13 | RBL97.355 | E | NM031506.14 | RBL06.140 | S  |
| LC32997.14 | RBL97.356 | L | NM031506.15 | RBL06.141 | E  |

|            |           |   |             |           |   |
|------------|-----------|---|-------------|-----------|---|
| LC32997.15 | RBL97.357 | E | NM031506.16 | RBL06.142 | R |
| LC32997.16 | RBL97.358 | E | NM031506.17 | RBL06.143 | E |
| LC32997.17 | RBL97.359 | P | NM031506.18 | RBL06.144 | E |
| LC32997.18 | RBL97.360 | E | NM031506.19 | RBL06.145 | E |
| LC32997.19 | RBL97.361 | E | NM031506.20 | RBL06.146 | E |
| LC32997.20 | RBL97.362 | E | NM031506.21 | RBL06.147 | R |
| LC32997.21 | RBL97.363 | I | NM031506.22 | RBL06.148 | S |
| LC32997.22 | RBL97.364 | B | NM031506.23 | RBL06.149 | S |
| LC32997.23 | RBL97.365 | E | NM031506.24 | RBL06.150 | E |
| LC32997.24 | RBL97.366 | F | NM031506.25 | RBL06.151 | E |
| LC32997.26 | RBL97.368 | E | NM031506.26 | RBL06.152 | E |
| LC32997.27 | RBL97.369 | R | HH032106.01 | RBL06.153 | E |
| LC32997.28 | RBL97.370 | E | HH032106.02 | RBL06.154 | E |
| LC32997.29 | RBL97.371 | E | HH032106.03 | RBL06.155 | E |
| LC32997.30 | RBL97.372 | E | HH032106.04 | RBL06.156 | E |
| HH21298.01 | RBL98.001 | H | HH032106.05 | RBL06.157 | E |
| HH21298.02 | RBL98.002 | M | HH032106.06 | RBL06.158 | E |
| HH21298.03 | RBL98.003 | E | HH032106.07 | RBL06.159 | E |
| HH21298.04 | RBL98.004 | R | HH032106.08 | RBL06.160 | E |
| HH21298.05 | RBL98.005 | E | HH032106.09 | RBL06.161 | E |
| HH21298.06 | RBL98.006 | E | HH032106.10 | RBL06.162 | E |
| HH21298.07 | RBL98.007 | J | HH032106.11 | RBL06.163 | E |
| HH21298.08 | RBL98.008 | E | HH032106.12 | RBL06.164 | E |
| HH21298.09 | RBL98.009 | J | HH032106.13 | RBL06.165 | B |
| HH21298.10 | RBL98.010 | E | HH032106.14 | RBL06.166 | F |
| HH21298.11 | RBL98.011 | E | HH032106.15 | RBL06.167 | E |
| HH21298.12 | RBL98.012 | K | HH032106.16 | RBL06.168 | E |
| HH21298.13 | RBL98.013 | B | HH032106.17 | RBL06.169 | E |
| HH21298.14 | RBL98.014 | S | HH032106.18 | RBL06.170 | C |
| HH21298.15 | RBL98.015 | E | HH032106.19 | RBL06.171 | E |
| HH21298.16 | RBL98.016 | E | HH032106.20 | RBL06.172 | E |
| HH21298.17 | RBL98.017 | E | HH032106.21 | RBL06.173 | E |
| HH21298.18 | RBL98.018 | F | HH032106.22 | RBL06.174 | F |
| HH21298.19 | RBL98.019 | R | HH032106.23 | RBL06.175 | Z |
| HH21298.20 | RBL98.020 | E | HH032106.24 | RBL06.176 | A |
| HH21298.21 | RBL98.021 | R | HH032106.25 | RBL06.177 | E |
| HH21298.22 | RBL98.022 | E | HF040606.01 | RBL06.178 | S |
| HH21298.23 | RBL98.023 | E | HF040606.02 | RBL06.179 | E |
| HH21298.24 | RBL98.024 | E | HF040606.03 | RBL06.180 | S |
| HH21298.25 | RBL98.025 | E | HF040606.04 | RBL06.181 | E |
| HH21298.26 | RBL98.026 | E | HF040606.05 | RBL06.182 | E |

|            |           |   |              |           |   |
|------------|-----------|---|--------------|-----------|---|
| HH21298.27 | RBL98.027 | E | HF040606.06  | RBL06.183 | E |
| HH21298.28 | RBL98.028 | E | HF040606.07  | RBL06.184 | E |
| HH21298.29 | RBL98.029 | E | HF040606.08  | RBL06.185 | E |
| HH21298.30 | RBL98.030 | E | HF040606.09  | RBL06.186 | C |
| HH22798.01 | RBL98.031 | E | HF040606.10  | RBL06.187 | E |
| HH22798.02 | RBL98.032 | E | HF040606.11  | RBL06.188 | R |
| HH22798.03 | RBL98.033 | E | HF040606.12  | RBL06.189 | S |
| HH22798.04 | RBL98.034 | E | HF040606.13  | RBL06.190 | E |
| HH22798.05 | RBL98.035 | R | HF040606.14  | RBL06.191 | A |
| HH22798.06 | RBL98.036 | E | HF040606.15  | RBL06.192 | E |
| HH22798.07 | RBL98.037 | E | HF040606.16  | RBL06.193 | E |
| HH22798.08 | RBL98.038 | V | HF040606.17  | RBL06.194 | E |
| HH22798.09 | RBL98.039 | E | HF040606.18  | RBL06.195 | E |
| HH22798.10 | RBL98.040 | G | HF040606.19  | RBL06.196 | E |
| HH22798.11 | RBL98.041 | S | HF040606.20  | RBL06.197 | E |
| HH22798.12 | RBL98.042 | S | HF040606.21  | RBL06.198 | C |
| HH22798.13 | RBL98.043 | E | HF040606.22  | RBL06.199 | C |
| HH22798.14 | RBL98.044 | E | HF040606.23  | RBL06.200 | E |
| HH22798.15 | RBL98.045 | Z | HF040606.24  | RBL06.201 | E |
| HH22798.16 | RBL98.046 | E | HF040606.25  | RBL06.202 | E |
| HH22798.17 | RBL98.047 | E | NWC040406.01 | RBL06.203 | J |
| HH22798.18 | RBL98.048 | E | NWC040406.02 | RBL06.204 | A |
| HH22798.19 | RBL98.049 | E | NWC040406.03 | RBL06.205 | E |
| HH22798.20 | RBL98.050 | E | NWC040406.04 | RBL06.206 | E |
| HH22798.21 | RBL98.051 | E | NWC040406.05 | RBL06.207 | B |
| HH22798.22 | RBL98.052 | E | NWC040406.06 | RBL06.208 | S |
| HH22798.23 | RBL98.053 | E | NWC040406.07 | RBL06.209 | B |
| HH22798.24 | RBL98.054 | F | NWC040406.08 | RBL06.210 | F |
| HH22798.25 | RBL98.055 | E | NWC040406.09 | RBL06.211 | B |
| HH22798.26 | RBL98.056 | E | NWC040406.10 | RBL06.212 | E |
| HH22798.27 | RBL98.057 | E | NWC040406.11 | RBL06.213 | E |
| HH22798.28 | RBL98.058 | E | NWC040406.12 | RBL06.214 | B |
| HH22798.29 | RBL98.059 | E | NWC040406.13 | RBL06.215 | E |
| HH22798.30 | RBL98.060 | M | NWC040406.14 | RBL06.216 | M |
| HH31798.01 | RBL98.061 | E | NWC040406.15 | RBL06.217 | M |
| HH31798.02 | RBL98.062 | E | NWC040406.16 | RBL06.218 | S |
| HH31798.03 | RBL98.063 | S | NWC040406.17 | RBL06.219 | E |
| HH31798.04 | RBL98.064 | E | NWC040406.18 | RBL06.220 | F |
| HH31798.05 | RBL98.065 | C | NWC040406.19 | RBL06.221 | S |
| HH31798.06 | RBL98.066 | E | NWC040406.20 | RBL06.222 | E |
| HH31798.07 | RBL98.067 | E | NWC040406.21 | RBL06.223 | E |

|            |           |   |              |           |    |
|------------|-----------|---|--------------|-----------|----|
| HH31798.08 | RBL98.068 | R | NWC040406.22 | RBL06.224 | E  |
| HH31798.09 | RBL98.069 | E | LC042706.01  | RBL06.225 | E  |
| HH31798.10 | RBL98.070 | F | LC042706.02  | RBL06.226 | E  |
| HH31798.11 | RBL98.071 | B | LC042706.03  | RBL06.227 | E  |
| HH31798.12 | RBL98.072 | E | LC042706.04  | RBL06.228 | E  |
| HH31798.13 | RBL98.073 | E | LC042706.05  | RBL06.229 | E  |
| HH31798.14 | RBL98.074 | E | LC042706.06  | RBL06.230 | E  |
| HH31798.15 | RBL98.075 | E | LC042706.07  | RBL06.231 | E  |
| HH31798.16 | RBL98.076 | R | LC042706.08  | RBL06.232 | E  |
| HH31798.17 | RBL98.077 | F | LC042706.09  | RBL06.233 | E  |
| HH31798.18 | RBL98.078 | F | LC042706.10  | RBL06.234 | E  |
| HH31798.19 | RBL98.079 | B | LC042706.11  | RBL06.235 | E  |
| HH31798.20 | RBL98.080 | E | LC042706.12  | RBL06.236 | E  |
| HH31798.21 | RBL98.081 | E | LC042706.13  | RBL06.237 | E  |
| HH31798.22 | RBL98.082 | E | LC042706.14  | RBL06.238 | R  |
| HH31798.23 | RBL98.083 | E | LC042706.15  | RBL06.239 | E  |
| HH31798.24 | RBL98.084 | I | LC042706.16  | RBL06.240 | E  |
| HH31798.25 | RBL98.085 | E | LC042706.17  | RBL06.241 | E  |
| HH4698.01  | RBL98.086 | A | LC042706.18  | RBL06.242 | E  |
| HH4698.02  | RBL98.087 | E | LC042706.19  | RBL06.243 | E  |
| HH4698.03  | RBL98.088 | S | LC042706.20  | RBL06.244 | E  |
| HH4698.04  | RBL98.089 | E | LC042706.21  | RBL06.245 | BB |
| HH4698.05  | RBL98.090 | F | LC042706.22  | RBL06.246 | E  |
| TC13198.01 | RBL98.091 | E | LC042706.23  | RBL06.247 | E  |
| TC13198.02 | RBL98.092 | E | LC042706.24  | RBL06.248 | E  |
| TC13198.03 | RBL98.093 | E | LC042706.25  | RBL06.249 | E  |
| TC13198.04 | RBL98.094 | E | TC020806.01  | RBL06.250 | E  |
| TC13198.05 | RBL98.095 | E | TC020806.02  | RBL06.251 | B  |
| TC13198.06 | RBL98.096 | E | TC020806.03  | RBL06.252 | A  |
| TC13198.07 | RBL98.097 | E | TC020806.04  | RBL06.253 | E  |
| TC13198.08 | RBL98.098 | E | TC020806.05  | RBL06.254 | A  |
| TC13198.09 | RBL98.099 | E | TC020806.06  | RBL06.255 | E  |
| TC13198.10 | RBL98.100 | E | TC020806.07  | RBL06.256 | R  |
| TC13198.11 | RBL98.101 | E | TC020806.08  | RBL06.257 | E  |
| TC13198.12 | RBL98.102 | E | TC020806.09  | RBL06.258 | E  |
| TC13198.13 | RBL98.103 | E | TC020806.10  | RBL06.259 | E  |
| TC13198.14 | RBL98.104 | E | TC020806.11  | RBL06.260 | A  |
| TC13198.15 | RBL98.105 | E | TC020806.12  | RBL06.261 | E  |
| TC13198.16 | RBL98.106 | E | TC020806.13  | RBL06.262 | B  |
| TC13198.17 | RBL98.107 | E | TC020806.14  | RBL06.263 | E  |
| TC13198.19 | RBL98.109 | E | TC020806.15  | RBL06.264 | R  |

|            |           |   |             |           |    |
|------------|-----------|---|-------------|-----------|----|
| TC13198.20 | RBL98.110 | E | TC020806.16 | RBL06.265 | E  |
| TC13198.21 | RBL98.111 | E | TC020806.17 | RBL06.266 | E  |
| TC13198.22 | RBL98.112 | E | TC020806.18 | RBL06.267 | E  |
| TC13198.23 | RBL98.113 | E | TC020806.19 | RBL06.268 | E  |
| TC13198.24 | RBL98.114 | E | TC020806.20 | RBL06.269 | B  |
| TC13198.25 | RBL98.115 | E | TC020806.21 | RBL06.270 | B  |
| TC13198.26 | RBL98.116 | E | TC020806.22 | RBL06.271 | E  |
| TC13198.27 | RBL98.117 | E | TC020806.23 | RBL06.272 | E  |
| TC13198.28 | RBL98.118 | E | TC020806.24 | RBL06.273 | A  |
| TC13198.29 | RBL98.119 | E | TC020806.25 | RBL06.274 | B  |
| TC13198.30 | RBL98.120 | E | TC022106.01 | RBL06.275 | E  |
| TC21298.01 | RBL98.121 | K | TC022106.02 | RBL06.276 | E  |
| TC21298.02 | RBL98.122 | B | TC022106.03 | RBL06.277 | E  |
| TC21298.03 | RBL98.123 | R | TC022106.04 | RBL06.278 | E  |
| TC21298.04 | RBL98.124 | K | TC022106.05 | RBL06.279 | E  |
| TC21298.05 | RBL98.125 | E | TC022106.06 | RBL06.280 | E  |
| TC21298.06 | RBL98.126 | S | TC022106.07 | RBL06.281 | E  |
| TC21298.07 | RBL98.127 | R | TC022106.08 | RBL06.282 | E  |
| TC21298.08 | RBL98.128 | E | TC022106.09 | RBL06.283 | E  |
| TC21298.09 | RBL98.129 | H | TC022106.10 | RBL06.284 | R  |
| TC21298.10 | RBL98.130 | E | TC022106.11 | RBL06.285 | E  |
| TC21298.11 | RBL98.131 | B | TC022106.12 | RBL06.286 | BB |
| TC21298.12 | RBL98.132 | E | TC022106.13 | RBL06.287 | B  |
| TC21298.13 | RBL98.133 | K | TC022106.14 | RBL06.288 | B  |
| TC21298.14 | RBL98.134 | R | TC022106.15 | RBL06.289 | B  |
| TC21298.15 | RBL98.135 | R | TC022106.16 | RBL06.290 | E  |
| TC21298.16 | RBL98.136 | F | TC022106.17 | RBL06.291 | BB |
| TC21298.17 | RBL98.137 | E | TC022106.18 | RBL06.292 | BB |
| TC21298.18 | RBL98.138 | E | TC022106.19 | RBL06.293 | B  |
| TC21298.19 | RBL98.139 | E | TC022106.20 | RBL06.294 | BB |
| TC21298.20 | RBL98.140 | E | TC022106.21 | RBL06.295 | E  |
| TC21298.21 | RBL98.141 | E | TC022106.22 | RBL06.296 | R  |
| TC21298.22 | RBL98.142 | R | TC022106.23 | RBL06.297 | E  |
| TC21298.23 | RBL98.143 | E | TC022106.24 | RBL06.298 | B  |
| TC21298.24 | RBL98.144 | E | TC022106.25 | RBL06.299 | B  |
| TC21298.25 | RBL98.145 | E | TC030706.01 | RBL06.300 | S  |
| TC21298.26 | RBL98.146 | E | TC030706.02 | RBL06.301 | S  |
| TC21298.27 | RBL98.147 | E | TC030706.03 | RBL06.302 | E  |
| TC21298.28 | RBL98.148 | E | TC030706.04 | RBL06.303 | S  |
| TC21298.29 | RBL98.149 | A | TC030706.05 | RBL06.304 | E  |
| TC21298.30 | RBL98.150 | B | TC030706.06 | RBL06.305 | E  |



|            |           |    |             |           |    |
|------------|-----------|----|-------------|-----------|----|
| TC22798.01 | RBL98.151 | E  | TC030706.07 | RBL06.306 | E  |
| TC22798.02 | RBL98.152 | E  | TC030706.08 | RBL06.307 | E  |
| TC22798.03 | RBL98.153 | E  | TC030706.09 | RBL06.308 | CC |
| TC22798.04 | RBL98.154 | E  | TC030706.10 | RBL06.309 | E  |
| TC22798.05 | RBL98.155 | E  | TC030706.11 | RBL06.310 | GG |
| TC22798.06 | RBL98.156 | E  | TC030706.12 | RBL06.311 | CC |
| TC22798.07 | RBL98.157 | E  | TC030706.13 | RBL06.312 | S  |
| TC22798.08 | RBL98.158 | E  | TC030706.14 | RBL06.313 | S  |
| TC22798.09 | RBL98.159 | E  | TC030706.15 | RBL06.314 | CC |
| TC22798.10 | RBL98.160 | E  | TC030706.16 | RBL06.315 | C  |
| TC22798.11 | RBL98.161 | E  | TC030706.17 | RBL06.316 | CC |
| TC22798.12 | RBL98.162 | E  | TC030706.18 | RBL06.317 | R  |
| TC22798.13 | RBL98.163 | E  | TC030706.19 | RBL06.318 | E  |
| TC22798.14 | RBL98.164 | E  | TC030706.20 | RBL06.319 | E  |
| TC22798.15 | RBL98.165 | E  | TC030706.21 | RBL06.320 | GG |
| TC22798.16 | RBL98.166 | E  | TC030706.22 | RBL06.321 | S  |
| TC22798.17 | RBL98.167 | E  | TC030706.23 | RBL06.322 | E  |
| TC22798.18 | RBL98.168 | E  | TC030706.24 | RBL06.323 | E  |
| TC22798.19 | RBL98.169 | E  | TC031506.01 | RBL06.324 | B  |
| TC22798.20 | RBL98.170 | E  | TC031506.02 | RBL06.325 | E  |
| TC22798.21 | RBL98.171 | S  | TC031506.03 | RBL06.326 | E  |
| TC22798.22 | RBL98.172 | E  | TC031506.04 | RBL06.327 | E  |
| TC22798.23 | RBL98.173 | E  | TC031506.05 | RBL06.328 | E  |
| TC22798.24 | RBL98.174 | E  | TC031506.06 | RBL06.329 | E  |
| TC22798.25 | RBL98.175 | E  | TC031506.07 | RBL06.330 | E  |
| TC22798.26 | RBL98.176 | E  | TC031506.08 | RBL06.331 | S  |
| TC22798.27 | RBL98.177 | E  | TC031506.09 | RBL06.332 | E  |
| TC22798.28 | RBL98.178 | S  | TC031506.10 | RBL06.333 | E  |
| TC22798.29 | RBL98.179 | E  | TC031506.11 | RBL06.334 | D  |
| TC22798.30 | RBL98.180 | E  | TC031506.12 | RBL06.335 | R  |
| TC31798.01 | RBL98.181 | A  | TC031506.13 | RBL06.336 | R  |
| TC31798.02 | RBL98.182 | E  | TC031506.14 | RBL06.337 | E  |
| TC31798.03 | RBL98.183 | E  | TC031506.16 | RBL06.339 | E  |
| TC31798.04 | RBL98.184 | E  | TC031506.18 | RBL06.341 | E  |
| TC31798.05 | RBL98.185 | J  | TC031506.19 | RBL06.342 | K  |
| TC31798.06 | RBL98.186 | E  | TC031506.20 | RBL06.343 | B  |
| TC31798.07 | RBL98.187 | BB | TC031506.22 | RBL06.345 | E  |
| TC31798.08 | RBL98.188 | E  | TC031506.23 | RBL06.346 | E  |
| TC31798.09 | RBL98.189 | E  | TC031506.24 | RBL06.347 | E  |
| TC31798.10 | RBL98.190 | A  | TC031506.25 | RBL06.348 | E  |
| TC31798.11 | RBL98.191 | E  | TC031506.26 | RBL06.349 | B  |

|            |           |   |             |           |    |
|------------|-----------|---|-------------|-----------|----|
| TC31798.12 | RBL98.192 | E | TC032206.01 | RBL06.350 | E  |
| TC31798.13 | RBL98.193 | F | TC032206.02 | RBL06.351 | A  |
| TC31798.14 | RBL98.194 | B | TC032206.03 | RBL06.352 | E  |
| TC31798.15 | RBL98.195 | P | TC032206.04 | RBL06.353 | E  |
| TC31798.16 | RBL98.196 | E | TC032206.05 | RBL06.354 | E  |
| TC31798.17 | RBL98.197 | B | TC032206.06 | RBL06.355 | E  |
| TC31798.18 | RBL98.198 | E | TC032206.07 | RBL06.356 | E  |
| TC31798.19 | RBL98.199 | E | TC032206.08 | RBL06.357 | E  |
| TC31798.20 | RBL98.200 | E | TC032206.09 | RBL06.358 | E  |
| TC31798.21 | RBL98.201 | E | TC032206.10 | RBL06.359 | E  |
| TC31798.22 | RBL98.202 | F | TC032206.11 | RBL06.360 | S  |
| TC31798.23 | RBL98.203 | E | TC032206.12 | RBL06.361 | E  |
| TC31798.24 | RBL98.204 | E | TC032206.13 | RBL06.362 | E  |
| TC31798.25 | RBL98.205 | B | TC032206.14 | RBL06.363 | E  |
| TC31798.26 | RBL98.206 | E | TC032206.15 | RBL06.364 | R  |
| TC31798.27 | RBL98.207 | E | TC032206.16 | RBL06.365 | R  |
| TC31798.28 | RBL98.208 | E | TC032206.17 | RBL06.366 | CC |
| TC31798.29 | RBL98.209 | E | TC032206.18 | RBL06.367 | E  |
| TC31798.30 | RBL98.210 | E | TC032206.19 | RBL06.368 | E  |
| TC31798.31 | RBL98.211 | B | TC032206.20 | RBL06.369 | E  |
| TC4698.01  | RBL98.212 | E | TC032206.21 | RBL06.370 | E  |
| TC4698.02  | RBL98.213 | B | TC032206.22 | RBL06.371 | S  |
| TC4698.03  | RBL98.214 | E | TC032206.23 | RBL06.372 | E  |
| TC4698.04  | RBL98.215 | F | TC032206.24 | RBL06.373 | E  |
| TC4698.05  | RBL98.216 | E | TC032206.25 | RBL06.374 | E  |
| TC4698.06  | RBL98.217 | E | TC040506.01 | RBL06.375 | E  |
| TC4698.07  | RBL98.218 | S | TC040506.02 | RBL06.376 | E  |
| TC4698.08  | RBL98.219 | E | TC040506.03 | RBL06.377 | B  |
| TC4698.09  | RBL98.220 | S | TC040506.05 | RBL06.379 | E  |
| TC4698.10  | RBL98.221 | E | TC040506.06 | RBL06.380 | E  |
| TC4698.11  | RBL98.222 | E | TC040506.07 | RBL06.381 | A  |
| TC4698.12  | RBL98.223 | E | TC040506.08 | RBL06.382 | E  |
| TC4698.13  | RBL98.224 | S | TC040506.09 | RBL06.383 | E  |
| TC4698.14  | RBL98.225 | P | TC040506.10 | RBL06.384 | E  |
| TC4698.15  | RBL98.226 | F | TC040506.11 | RBL06.385 | E  |
| TC4698.16  | RBL98.227 | E | TC040506.12 | RBL06.386 | R  |
| TC4698.17  | RBL98.228 | E | TC040506.13 | RBL06.387 | E  |
| TC4698.18  | RBL98.229 | R | TC040506.14 | RBL06.388 | E  |
| TC4698.20  | RBL98.231 | E | TC040506.15 | RBL06.389 | E  |
| TC4698.21  | RBL98.232 | E | TC040506.16 | RBL06.390 | E  |
| TC4698.22  | RBL98.233 | P | TC040506.17 | RBL06.391 | E  |

|            |           |   |             |           |   |
|------------|-----------|---|-------------|-----------|---|
| TC4698.23  | RBL98.234 | E | TC040506.18 | RBL06.392 | R |
| TC4698.24  | RBL98.235 | B | TC040506.19 | RBL06.393 | A |
| TC4698.25  | RBL98.236 | Q | TC040506.20 | RBL06.394 | E |
| WC13198.01 | RBL98.237 | C | TC040506.21 | RBL06.395 | E |
| WC13198.02 | RBL98.238 | F | TC040506.22 | RBL06.396 | E |
| WC13198.03 | RBL98.239 | R | TC040506.23 | RBL06.397 | E |
| WC21298.01 | RBL98.240 | R | TC040506.24 | RBL06.398 | B |
| WC21298.02 | RBL98.241 | E | TC040506.25 | RBL06.399 | E |
| WC21298.03 | RBL98.242 | Z | TC042706.01 | RBL06.400 | A |
| WC21298.04 | RBL98.243 | E | TC042706.02 | RBL06.401 | A |
| WC21298.05 | RBL98.244 | R | TC042706.03 | RBL06.402 | B |
| WC21298.06 | RBL98.245 | E | TC042706.04 | RBL06.403 | B |
| WC21298.07 | RBL98.246 | E | TC042706.05 | RBL06.404 | R |
| WC21298.08 | RBL98.247 | R | TC042706.06 | RBL06.405 | B |
| WC21298.09 | RBL98.248 | R | TC042706.07 | RBL06.406 | R |
| WC21298.10 | RBL98.249 | A | TC042706.09 | RBL06.408 | B |
| WC21298.11 | RBL98.250 | E | TC042706.10 | RBL06.409 | B |
| WC21298.12 | RBL98.251 | E | TC042706.11 | RBL06.410 | B |
| WC21298.13 | RBL98.252 | E | TC042706.12 | RBL06.411 | B |
| WC21298.14 | RBL98.253 | Z | TC042706.13 | RBL06.412 | B |
| WC21298.15 | RBL98.254 | E | TC042706.14 | RBL06.413 | B |
| WC21298.16 | RBL98.255 | Q | TC042706.15 | RBL06.414 | B |
| WC21298.17 | RBL98.256 | E | TC042706.16 | RBL06.415 | B |
| WC21298.18 | RBL98.257 | A | TC042706.17 | RBL06.416 | R |
| WC21298.19 | RBL98.258 | E | TC042706.18 | RBL06.417 | R |
| WC21298.20 | RBL98.259 | E | TC042706.19 | RBL06.418 | B |
| WC21298.21 | RBL98.260 | E | TC042706.20 | RBL06.419 | B |
| WC21298.22 | RBL98.261 | E | TC042706.21 | RBL06.420 | R |
| WC21298.23 | RBL98.262 | E | TC042706.22 | RBL06.421 | B |
| WC21298.24 | RBL98.263 | E | TC042706.23 | RBL06.422 | B |
| WC21298.25 | RBL98.264 | E | TC042706.24 | RBL06.423 | E |
| WC21298.26 | RBL98.265 | R | TC042706.25 | RBL06.424 | R |
| WC22798.01 | RBL98.266 | S | YC020706.01 | RBL06.452 | E |
| WC22798.02 | RBL98.267 | E | YC020706.02 | RBL06.453 | E |
| WC22798.03 | RBL98.268 | S | YC020706.03 | RBL06.454 | E |
| WC22798.04 | RBL98.269 | S | YC020706.04 | RBL06.455 | E |
| WC22798.05 | RBL98.270 | R | YC020706.05 | RBL06.456 | E |
| WC22798.06 | RBL98.271 | A | YC020706.06 | RBL06.457 | E |
| WC22798.07 | RBL98.272 | E | YC020706.07 | RBL06.458 | E |
| WC22798.08 | RBL98.273 | E | YC020706.08 | RBL06.459 | E |
| WC22798.09 | RBL98.274 | E | YC020706.09 | RBL06.460 | E |

|            |           |   |             |           |    |
|------------|-----------|---|-------------|-----------|----|
| WC22798.10 | RBL98.275 | S | YC020706.10 | RBL06.461 | E  |
| WC22798.11 | RBL98.276 | E | YC020706.11 | RBL06.462 | V  |
| WC22798.12 | RBL98.277 | A | YC020706.12 | RBL06.463 | E  |
| WC22798.13 | RBL98.278 | S | YC020706.13 | RBL06.464 | E  |
| WC22798.14 | RBL98.279 | S | YC020706.14 | RBL06.465 | E  |
| WC22798.15 | RBL98.280 | E | YC020706.15 | RBL06.466 | J  |
| WC22798.16 | RBL98.281 | E | YC020706.16 | RBL06.467 | E  |
| WC22798.17 | RBL98.282 | E | YC020706.17 | RBL06.468 | C  |
| WC22798.18 | RBL98.283 | E | YC020706.18 | RBL06.469 | E  |
| WC22798.19 | RBL98.284 | E | YC020706.19 | RBL06.470 | E  |
| WC22798.20 | RBL98.285 | A | YC020706.20 | RBL06.471 | F  |
| WC22798.21 | RBL98.286 | E | YC020706.21 | RBL06.472 | B  |
| WC22798.22 | RBL98.287 | E | YC020706.22 | RBL06.473 | E  |
| WC22798.23 | RBL98.288 | E | YC020706.23 | RBL06.474 | E  |
| WC22798.24 | RBL98.289 | E | YC020706.24 | RBL06.475 | E  |
| WC22798.25 | RBL98.290 | E | YC020706.25 | RBL06.476 | E  |
| WC22798.26 | RBL98.291 | E | YC020706.26 | RBL06.477 | E  |
| WC22798.27 | RBL98.292 | E | YC022306.01 | RBL06.478 | E  |
| WC22798.28 | RBL98.293 | E | YC022306.02 | RBL06.479 | J  |
| WC22798.29 | RBL98.294 | S | YC022306.03 | RBL06.480 | H  |
| WC22798.30 | RBL98.295 | B | YC022306.04 | RBL06.481 | E  |
| WC31798.01 | RBL98.296 | E | YC022306.05 | RBL06.482 | E  |
| WC31798.02 | RBL98.297 | H | YC022306.06 | RBL06.483 | E  |
| WC31798.03 | RBL98.298 | E | YC022306.07 | RBL06.484 | E  |
| WC31798.04 | RBL98.299 | F | YC022306.08 | RBL06.485 | R  |
| WC31798.05 | RBL98.300 | E | YC022306.09 | RBL06.486 | E  |
| WC31798.06 | RBL98.301 | E | YC022306.10 | RBL06.487 | E  |
| WC31798.07 | RBL98.302 | A | YC022306.11 | RBL06.488 | CC |
| WC31798.09 | RBL98.304 | C | YC022306.12 | RBL06.489 | R  |
| WC31798.10 | RBL98.305 | E | YC022306.13 | RBL06.490 | S  |
| WC31798.11 | RBL98.306 | E | YC022306.14 | RBL06.491 | E  |
| WC31798.12 | RBL98.307 | B | YC022306.15 | RBL06.492 | CC |
| WC31798.13 | RBL98.308 | E | YC022306.16 | RBL06.493 | E  |
| WC31798.14 | RBL98.309 | E | YC022306.17 | RBL06.494 | E  |
| WC31798.15 | RBL98.310 | B | YC022306.18 | RBL06.495 | B  |
| WC31798.16 | RBL98.311 | E | YC022306.19 | RBL06.496 | E  |
| WC31798.17 | RBL98.312 | E | YC022306.20 | RBL06.497 | E  |
| WC31798.18 | RBL98.313 | E | YC022306.21 | RBL06.498 | E  |
| WC31798.19 | RBL98.314 | E | YC022306.22 | RBL06.499 | R  |
| WC31798.21 | RBL98.316 | I | YC022306.23 | RBL06.500 | E  |
| WC31798.22 | RBL98.317 | E | YC022306.24 | RBL06.501 | S  |

|            |           |   |             |           |   |
|------------|-----------|---|-------------|-----------|---|
| WC31798.23 | RBL98.318 | E | YC022306.25 | RBL06.502 | E |
| WC31798.24 | RBL98.319 | E | YC030806.01 | RBL06.503 | E |
| WC31798.25 | RBL98.320 | E | YC030806.02 | RBL06.504 | K |
| WC4698.01  | RBL98.321 | E | YC030806.03 | RBL06.505 | E |
| WC4698.02  | RBL98.322 | E | YC030806.04 | RBL06.506 | E |
| WC4698.03  | RBL98.323 | E | YC030806.05 | RBL06.507 | E |
| WC4698.04  | RBL98.324 | E | YC030806.06 | RBL06.508 | E |
| WC4698.05  | RBL98.325 | B | YC030806.07 | RBL06.509 | P |
| WC4698.06  | RBL98.326 | E | YC030806.08 | RBL06.510 | E |
| WC4698.07  | RBL98.327 | E | YC030806.09 | RBL06.511 | E |
| WC4698.08  | RBL98.328 | E | YC030806.10 | RBL06.512 | R |
| WC4698.09  | RBL98.329 | E | YC030806.11 | RBL06.513 | K |
| WC4698.10  | RBL98.330 | E | YC030806.12 | RBL06.514 | R |
| WC4698.11  | RBL98.331 | E | YC030806.13 | RBL06.515 | E |
| WC4698.12  | RBL98.332 | E | YC030806.14 | RBL06.516 | E |
| WC4698.13  | RBL98.333 | S | YC030806.15 | RBL06.517 | R |
| WC4698.14  | RBL98.334 | E | YC030806.16 | RBL06.518 | E |
| WC4698.15  | RBL98.335 | E | YC030806.17 | RBL06.519 | V |
| WC4698.16  | RBL98.336 | E | YC030806.18 | RBL06.520 | R |
| WC4698.17  | RBL98.337 | J | YC030806.19 | RBL06.521 | B |
| WC4698.18  | RBL98.338 | J | YC030806.20 | RBL06.522 | F |
| WC4698.19  | RBL98.339 | E | YC030806.21 | RBL06.523 | E |
| WC4698.20  | RBL98.340 | E | YC030806.22 | RBL06.524 | E |
| WC4698.21  | RBL98.341 | E | YC030806.23 | RBL06.525 | C |
| WC4698.22  | RBL98.342 | E | YC030806.24 | RBL06.526 | F |
| WC4698.23  | RBL98.343 | E | YC030806.25 | RBL06.527 | E |
| WC4698.24  | RBL98.344 | E | YC031406.01 | RBL06.528 | E |
| WC4698.25  | RBL98.345 | C | YC031406.02 | RBL06.529 | E |
| YC13198.01 | RBL98.346 | E | YC031406.03 | RBL06.530 | R |
| YC13198.02 | RBL98.347 | J | YC031406.04 | RBL06.531 | V |
| YC13198.03 | RBL98.348 | E | YC031406.05 | RBL06.532 | E |
| YC13198.04 | RBL98.349 | J | YC031406.06 | RBL06.533 | E |
| YC13198.05 | RBL98.350 | E | YC031406.07 | RBL06.534 | F |
| YC13198.06 | RBL98.351 | E | YC031406.08 | RBL06.535 | R |
| YC13198.07 | RBL98.352 | E | YC031406.09 | RBL06.536 | E |
| YC13198.08 | RBL98.353 | B | YC031406.10 | RBL06.537 | E |
| YC13198.09 | RBL98.354 | E | YC031406.11 | RBL06.538 | E |
| YC13198.10 | RBL98.355 | E | YC031406.12 | RBL06.539 | R |
| YC13198.11 | RBL98.356 | J | YC031406.13 | RBL06.540 | E |
| YC13198.12 | RBL98.357 | V | YC031406.14 | RBL06.541 | R |
| YC13198.13 | RBL98.358 | R | YC031406.15 | RBL06.542 | E |

|            |           |   |             |           |   |
|------------|-----------|---|-------------|-----------|---|
| YC13198.14 | RBL98.359 | E | YC031406.16 | RBL06.543 | F |
| YC13198.15 | RBL98.360 | E | YC031406.17 | RBL06.544 | E |
| YC13198.16 | RBL98.361 | E | YC031406.18 | RBL06.545 | E |
| YC13198.17 | RBL98.362 | E | YC031406.19 | RBL06.546 | E |
| YC13198.18 | RBL98.363 | E | YC031406.20 | RBL06.547 | R |
| YC13198.19 | RBL98.364 | B | YC031406.21 | RBL06.548 | E |
| YC13198.20 | RBL98.365 | E | YC031406.22 | RBL06.549 | E |
| YC13198.21 | RBL98.366 | B | YC031406.23 | RBL06.550 | E |
| YC13198.22 | RBL98.367 | B | YC031406.24 | RBL06.551 | E |
| YC13198.23 | RBL98.368 | V | YC031406.25 | RBL06.552 | E |
| YC13198.24 | RBL98.369 | B | YC031406.26 | RBL06.553 | E |
| YC13198.25 | RBL98.370 | H | YC040506.01 | RBL06.554 | A |
| YC13198.26 | RBL98.371 | E | YC040506.02 | RBL06.555 | E |
| YC13198.27 | RBL98.372 | B | YC040506.03 | RBL06.556 | E |
| YC13198.28 | RBL98.373 | E | YC040506.04 | RBL06.557 | J |
| YC13198.29 | RBL98.374 | V | YC040506.05 | RBL06.558 | E |
| YC13198.30 | RBL98.375 | R | YC040506.06 | RBL06.559 | A |
| YC21298.01 | RBL98.376 | H | YC040506.07 | RBL06.560 | E |
| YC21298.02 | RBL98.377 | E | YC040506.08 | RBL06.561 | E |
| YC21298.03 | RBL98.378 | E | YC040506.09 | RBL06.562 | E |
| YC21298.04 | RBL98.379 | R | YC040506.10 | RBL06.563 | B |
| YC21298.05 | RBL98.380 | E | YC040506.11 | RBL06.564 | E |
| YC21298.06 | RBL98.381 | E | YC040506.12 | RBL06.565 | R |
| YC21298.07 | RBL98.382 | R | YC040506.13 | RBL06.566 | J |
| YC21298.08 | RBL98.383 | E | YC040506.14 | RBL06.567 | L |
| YC21298.09 | RBL98.384 | E | YC040506.15 | RBL06.568 | E |
| YC21298.10 | RBL98.385 | C | YC040506.16 | RBL06.569 | E |
| YC21298.11 | RBL98.386 | P | YC040506.17 | RBL06.570 | E |
| YC21298.12 | RBL98.387 | R | YC040506.18 | RBL06.571 | E |
| YC21298.13 | RBL98.388 | E | YC040506.19 | RBL06.572 | E |
| YC21298.14 | RBL98.389 | E | YC040506.20 | RBL06.573 | B |
| YC21298.15 | RBL98.390 | B | YC040506.21 | RBL06.574 | E |
| YC21298.16 | RBL98.391 | E | YC040506.22 | RBL06.575 | E |
| YC21298.17 | RBL98.392 | E | YC040506.23 | RBL06.576 | E |
| YC21298.18 | RBL98.393 | C | YC040506.24 | RBL06.577 | E |
| YC21298.19 | RBL98.394 | E | YC042506.01 | RBL06.578 | B |
| YC21298.20 | RBL98.395 | B | YC042506.02 | RBL06.579 | E |
| YC21298.21 | RBL98.396 | A | YC042506.03 | RBL06.580 | R |
| YC21298.22 | RBL98.397 | H | YC042506.04 | RBL06.581 | B |
| YC21298.23 | RBL98.398 | E | YC042506.05 | RBL06.582 | E |
| YC21298.24 | RBL98.399 | R | YC042506.06 | RBL06.583 | E |

|            |           |   |             |           |    |
|------------|-----------|---|-------------|-----------|----|
| YC21298.25 | RBL98.400 | B | YC042506.07 | RBL06.584 | B  |
| YC21298.26 | RBL98.401 | E | YC042506.08 | RBL06.585 | B  |
| YC21298.27 | RBL98.402 | A | YC042506.09 | RBL06.586 | B  |
| YC21298.28 | RBL98.403 | R | YC042506.10 | RBL06.587 | B  |
| YC21298.29 | RBL98.404 | R | YC042506.11 | RBL06.588 | E  |
| YC22798.01 | RBL98.406 | E | YC042506.12 | RBL06.589 | B  |
| YC22798.02 | RBL98.407 | E | YC042506.13 | RBL06.590 | B  |
| YC22798.03 | RBL98.408 | E | YC042506.14 | RBL06.591 | B  |
| YC22798.04 | RBL98.409 | R | YC042506.15 | RBL06.592 | E  |
| YC22798.05 | RBL98.410 | B | YC042506.16 | RBL06.593 | E  |
| YC22798.06 | RBL98.411 | E | YC042506.17 | RBL06.594 | E  |
| YC22798.07 | RBL98.412 | E | YC042506.18 | RBL06.595 | E  |
| YC22798.08 | RBL98.413 | J | YC042506.19 | RBL06.596 | R  |
| YC22798.09 | RBL98.414 | E | YC042506.20 | RBL06.597 | B  |
| YC22798.10 | RBL98.415 | V | YC042506.21 | RBL06.598 | R  |
| YC22798.11 | RBL98.416 | E | YC042506.22 | RBL06.599 | B  |
| YC22798.12 | RBL98.417 | E | YC042506.23 | RBL06.600 | E  |
| YC22798.13 | RBL98.418 | B | YC042506.24 | RBL06.601 | E  |
| YC22798.14 | RBL98.419 | E | YC042506.25 | RBL06.602 | B  |
| YC22798.15 | RBL98.420 | E | YC042506.26 | RBL06.603 | E  |
| YC22798.16 | RBL98.421 | E | YC042506.27 | RBL06.604 | B  |
| YC22798.17 | RBL98.422 | B | YC042506.28 | RBL06.605 | E  |
| YC22798.18 | RBL98.423 | E | YC032206.01 | RBL06.606 | E  |
| YC22798.19 | RBL98.424 | E | YC032206.02 | RBL06.607 | A  |
| YC22798.20 | RBL98.425 | E | YC032206.03 | RBL06.608 | BB |
| YC22798.21 | RBL98.426 | B | YC032206.04 | RBL06.609 | E  |
| YC22798.22 | RBL98.427 | E | YC032206.05 | RBL06.610 | E  |
| YC22798.23 | RBL98.428 | B | YC032206.06 | RBL06.611 | E  |
| YC22798.24 | RBL98.429 | B | YC032206.07 | RBL06.612 | R  |
| YC22798.26 | RBL98.431 | S | YC032206.08 | RBL06.613 | E  |
| YC22798.27 | RBL98.432 | E | YC032206.09 | RBL06.614 | E  |
| YC22798.28 | RBL98.433 | E | YC032206.10 | RBL06.615 | E  |
| YC22798.29 | RBL98.434 | B | YC032206.11 | RBL06.616 | E  |
| YC22798.30 | RBL98.435 | E | YC032206.12 | RBL06.617 | H  |
| YC31798.01 | RBL98.436 | E | YC032206.13 | RBL06.618 | R  |
| YC31798.02 | RBL98.437 | E | YC032206.14 | RBL06.619 | E  |
| YC31798.03 | RBL98.438 | R | YC032206.15 | RBL06.620 | E  |
| YC31798.04 | RBL98.439 | E | YC032206.16 | RBL06.621 | E  |
| YC31798.05 | RBL98.440 | E | YC032206.17 | RBL06.622 | A  |
| YC31798.06 | RBL98.441 | E | YC032206.18 | RBL06.623 | E  |
| YC31798.07 | RBL98.442 | E | YC032206.19 | RBL06.624 | E  |

|            |           |    |             |           |    |
|------------|-----------|----|-------------|-----------|----|
| YC31798.08 | RBL98.443 | E  | YC032206.20 | RBL06.625 | R  |
| YC31798.09 | RBL98.444 | B  | YC032206.21 | RBL06.626 | E  |
| YC31798.10 | RBL98.445 | E  | YC032206.22 | RBL06.627 | A  |
| YC31798.11 | RBL98.446 | E  | YC032206.23 | RBL06.628 | E  |
| YC31798.12 | RBL98.447 | E  | YC032206.24 | RBL06.629 | E  |
| YC31798.13 | RBL98.448 | E  | YC032206.25 | RBL06.630 | E  |
| YC31798.14 | RBL98.449 | E  | YC020507.01 | RBL07.001 | E  |
| YC31798.15 | RBL98.450 | E  | YC020507.02 | RBL07.002 | H  |
| YC31798.16 | RBL98.451 | Z  | YC020507.03 | RBL07.003 | E  |
| YC31798.17 | RBL98.452 | E  | YC020507.04 | RBL07.004 | E  |
| YC31798.18 | RBL98.453 | E  | YC020507.05 | RBL07.005 | E  |
| YC31798.19 | RBL98.454 | B  | YC020507.06 | RBL07.006 | E  |
| YC31798.20 | RBL98.455 | E  | YC020507.07 | RBL07.007 | E  |
| YC31798.21 | RBL98.456 | E  | YC020507.08 | RBL07.008 | E  |
| YC31798.22 | RBL98.457 | F  | YC020507.09 | RBL07.009 | M  |
| YC31798.23 | RBL98.458 | E  | YC020507.10 | RBL07.010 | C  |
| YC31798.24 | RBL98.459 | E  | YC020507.11 | RBL07.011 | B  |
| YC31798.25 | RBL98.460 | E  | YC020507.12 | RBL07.012 | E  |
| YC31798.26 | RBL98.461 | E  | YC020507.13 | RBL07.013 | H  |
| YC31798.27 | RBL98.462 | AA | YC020507.14 | RBL07.014 | E  |
| YC31798.28 | RBL98.463 | E  | YC020507.15 | RBL07.015 | H  |
| YC31798.29 | RBL98.464 | E  | YC020507.16 | RBL07.016 | H  |
| YC31798.30 | RBL98.465 | E  | YC020507.17 | RBL07.017 | H  |
| YC4698.01  | RBL98.466 | S  | YC020507.18 | RBL07.018 | B  |
| YC4698.02  | RBL98.467 | B  | YC020507.19 | RBL07.019 | E  |
| YC4698.03  | RBL98.468 | E  | YC020507.20 | RBL07.020 | E  |
| YC4698.04  | RBL98.469 | E  | YC020507.21 | RBL07.021 | R  |
| YC4698.05  | RBL98.470 | E  | YC020507.22 | RBL07.022 | E  |
| YC4698.06  | RBL98.471 | S  | YC020507.23 | RBL07.023 | E  |
| YC4698.07  | RBL98.472 | C  | YC020507.24 | RBL07.024 | E  |
| YC4698.08  | RBL98.473 | E  | YC020507.25 | RBL07.025 | E  |
| YC4698.09  | RBL98.474 | E  | YC022007.01 | RBL07.026 | F  |
| YC4698.10  | RBL98.475 | E  | YC022007.02 | RBL07.027 | C  |
| YC4698.11  | RBL98.476 | E  | YC022007.03 | RBL07.028 | H  |
| YC4698.12  | RBL98.477 | B  | YC022007.04 | RBL07.029 | E  |
| YC4698.13  | RBL98.478 | E  | YC022007.05 | RBL07.030 | E  |
| YC4698.14  | RBL98.479 | E  | YC022007.06 | RBL07.031 | FF |
| YC4698.15  | RBL98.480 | E  | YC022007.07 | RBL07.032 | E  |
| YC4698.16  | RBL98.481 | E  | YC022007.08 | RBL07.033 | E  |
| YC4698.17  | RBL98.482 | P  | YC022007.09 | RBL07.034 | E  |
| YC4698.18  | RBL98.483 | E  | YC022007.10 | RBL07.035 | E  |



|             |           |   |             |           |   |
|-------------|-----------|---|-------------|-----------|---|
| YC4698.19   | RBL98.484 | E | YC022007.11 | RBL07.036 | E |
| YC4698.20   | RBL98.485 | E | YC022007.12 | RBL07.037 | B |
| YC4698.21   | RBL98.486 | E | YC022007.13 | RBL07.038 | E |
| YC4698.22   | RBL98.487 | C | YC022007.14 | RBL07.039 | F |
| YC4698.23   | RBL98.488 | E | YC022007.15 | RBL07.040 | K |
| YC4698.24   | RBL98.489 | E | YC022007.16 | RBL07.041 | E |
| YC4698.25   | RBL98.490 | E | YC022007.17 | RBL07.042 | F |
| WC021999.01 | RBL99.001 | E | YC022007.18 | RBL07.043 | E |
| WC021999.02 | RBL99.002 | R | YC022007.19 | RBL07.044 | E |
| WC021999.03 | RBL99.003 | R | YC022007.20 | RBL07.045 | R |
| WC021999.04 | RBL99.004 | E | YC022007.21 | RBL07.046 | E |
| WC021999.05 | RBL99.005 | P | YC022007.22 | RBL07.047 | K |
| WC021999.06 | RBL99.006 | E | YC022007.23 | RBL07.048 | C |
| WC021999.07 | RBL99.007 | B | YC022007.24 | RBL07.049 | E |
| HH022099.01 | RBL99.008 | E | YC022007.25 | RBL07.050 | A |
| HH022099.02 | RBL99.009 | H | YC031207.01 | RBL07.051 | S |
| HH022099.03 | RBL99.010 | R | YC031207.02 | RBL07.052 | E |
| HH022099.04 | RBL99.011 | S | YC031207.03 | RBL07.053 | B |
| HH022099.05 | RBL99.012 | E | YC031207.04 | RBL07.054 | A |
| HH022099.06 | RBL99.013 | E | YC031207.05 | RBL07.055 | E |
| HH022099.07 | RBL99.014 | R | YC031207.06 | RBL07.056 | H |
| HH022099.08 | RBL99.015 | E | YC031207.07 | RBL07.057 | E |
| HH022099.09 | RBL99.016 | E | YC031207.08 | RBL07.058 | B |
| HH022099.10 | RBL99.017 | E | YC031207.09 | RBL07.059 | E |
| HH022099.11 | RBL99.018 | A | YC031207.10 | RBL07.060 | E |
| HH022099.12 | RBL99.019 | V | YC031207.11 | RBL07.061 | E |
| HH022099.13 | RBL99.020 | E | YC031207.12 | RBL07.062 | R |
| HH022099.14 | RBL99.021 | E | YC031207.13 | RBL07.063 | A |
| HH022099.15 | RBL99.022 | E | YC031207.14 | RBL07.064 | E |
| HH022099.16 | RBL99.023 | B | YC031207.15 | RBL07.065 | E |
| HH022099.17 | RBL99.024 | S | YC031207.16 | RBL07.066 | E |
| HH022099.18 | RBL99.025 | S | YC031207.17 | RBL07.067 | E |
| HH022099.19 | RBL99.026 | V | YC031207.18 | RBL07.068 | E |
| HH022099.20 | RBL99.027 | E | YC031207.19 | RBL07.069 | E |
| HH022099.21 | RBL99.028 | E | YC031207.20 | RBL07.070 | R |
| HH022099.22 | RBL99.029 | E | YC031207.21 | RBL07.071 | E |
| HH022099.23 | RBL99.030 | E | YC031207.22 | RBL07.072 | R |
| HH022099.24 | RBL99.031 | E | YC031207.23 | RBL07.073 | B |
| HH022099.25 | RBL99.032 | E | YC031207.24 | RBL07.074 | R |
| TC022099.01 | RBL99.033 | E | YC031207.25 | RBL07.075 | E |
| TC022099.02 | RBL99.034 | A | YC031207.26 | RBL07.076 | E |

|             |           |   |             |           |   |
|-------------|-----------|---|-------------|-----------|---|
| TC022099.03 | RBL99.035 | E | YC031207.27 | RBL07.077 | B |
| TC022099.04 | RBL99.036 | E | YC031207.28 | RBL07.078 | A |
| TC022099.05 | RBL99.037 | E | YC031207.29 | RBL07.079 | E |
| TC022099.06 | RBL99.038 | E | YC031207.30 | RBL07.080 | A |
| TC022099.07 | RBL99.039 | E | YC031207.31 | RBL07.081 | C |
| TC022099.08 | RBL99.040 | E | YC031207.32 | RBL07.082 | E |
| TC022099.09 | RBL99.041 | E | YC031207.33 | RBL07.083 | C |
| TC022099.10 | RBL99.042 | E | YC031207.34 | RBL07.084 | B |
| TC022099.11 | RBL99.043 | E | YC031207.35 | RBL07.085 | B |
| TC022099.12 | RBL99.044 | E | NM020607.01 | RBL07.086 | E |
| TC022099.13 | RBL99.045 | E | NM020607.02 | RBL07.087 | E |
| TC022099.14 | RBL99.046 | E | NM020607.03 | RBL07.088 | H |
| TC022099.15 | RBL99.047 | A | NM020607.04 | RBL07.089 | F |
| TC022099.16 | RBL99.048 | E | NM020607.05 | RBL07.090 | S |
| TC022099.17 | RBL99.049 | E | NM020607.06 | RBL07.091 | S |
| TC022099.18 | RBL99.050 | E | NM020607.07 | RBL07.092 | F |
| TC022099.19 | RBL99.051 | B | NM020607.08 | RBL07.093 | E |
| TC022099.20 | RBL99.052 | E | NM020607.09 | RBL07.094 | E |
| TC022099.21 | RBL99.053 | E | NM020607.10 | RBL07.095 | E |
| TC022099.22 | RBL99.054 | E | NM020607.11 | RBL07.096 | E |
| TC022099.23 | RBL99.055 | E | NM020607.12 | RBL07.097 | S |
| TC022099.24 | RBL99.056 | B | NM020607.13 | RBL07.098 | S |
| TC022099.25 | RBL99.057 | F | NM020607.14 | RBL07.099 | P |
| YC022099.01 | RBL99.058 | E | NM020607.15 | RBL07.100 | E |
| YC022099.02 | RBL99.059 | E | NM020607.16 | RBL07.101 | B |
| YC022099.03 | RBL99.060 | E | NM020607.17 | RBL07.102 | E |
| YC022099.04 | RBL99.061 | E | NM020607.18 | RBL07.103 | I |
| YC022099.05 | RBL99.062 | E | NM020607.19 | RBL07.104 | p |
| YC022099.06 | RBL99.063 | B | NM020607.20 | RBL07.105 | E |
| YC022099.07 | RBL99.064 | E | NM020607.21 | RBL07.106 | S |
| YC022099.08 | RBL99.065 | E | NM020607.22 | RBL07.107 | S |
| YC022099.09 | RBL99.066 | E | NM020607.23 | RBL07.108 | E |
| YC022099.10 | RBL99.067 | B | NM020607.24 | RBL07.109 | F |
| YC022099.11 | RBL99.068 | R | NM020607.25 | RBL07.110 | E |
| YC022099.12 | RBL99.069 | E | NM022707.01 | RBL07.111 | E |
| YC022099.13 | RBL99.070 | V | NM022707.02 | RBL07.112 | S |
| YC022099.14 | RBL99.071 | S | NM022707.03 | RBL07.113 | C |
| YC022099.15 | RBL99.072 | E | NM022707.04 | RBL07.114 | S |
| YC022099.16 | RBL99.073 | U | NM022707.05 | RBL07.115 | S |
| YC022099.17 | RBL99.074 | E | NM022707.06 | RBL07.116 | E |
| YC022099.18 | RBL99.075 | E | NM022707.07 | RBL07.117 | E |

|             |           |   |             |           |   |
|-------------|-----------|---|-------------|-----------|---|
| YC022099.19 | RBL99.076 | E | NM022707.08 | RBL07.118 | B |
| YC022099.20 | RBL99.077 | E | NM022707.09 | RBL07.119 | E |
| YC022099.21 | RBL99.078 | E | NM022707.10 | RBL07.120 | A |
| YC022099.22 | RBL99.079 | E | NM022707.11 | RBL07.121 | S |
| YC022099.23 | RBL99.080 | B | NM022707.12 | RBL07.122 | S |
| YC022099.24 | RBL99.081 | E | NM022707.13 | RBL07.123 | A |
| YC022099.25 | RBL99.082 | E | NM022707.14 | RBL07.124 | E |
| WC030699.01 | RBL99.083 | E | NM022707.15 | RBL07.125 | E |
| WC030699.02 | RBL99.084 | E | NM022707.16 | RBL07.126 | B |
| WC030699.03 | RBL99.085 | E | NM022707.17 | RBL07.127 | A |
| WC030699.04 | RBL99.086 | E | NM022707.18 | RBL07.128 | R |
| WC030699.05 | RBL99.087 | B | NM022707.19 | RBL07.129 | E |
| WC030699.06 | RBL99.088 | E | NM022707.20 | RBL07.130 | A |
| WC030699.07 | RBL99.089 | E | NM031507.01 | RBL07.132 | R |
| WC030699.08 | RBL99.090 | F | NM031507.02 | RBL07.133 | E |
| WC030699.09 | RBL99.091 | E | NM031507.03 | RBL07.134 | E |
| WC030699.10 | RBL99.092 | B | NM031507.04 | RBL07.135 | B |
| WC030699.11 | RBL99.093 | E | NM031507.05 | RBL07.136 | E |
| WC030699.12 | RBL99.094 | E | NM031507.06 | RBL07.137 | E |
| WC030699.13 | RBL99.095 | E | NM031507.07 | RBL07.138 | S |
| WC030699.14 | RBL99.096 | B | NM031507.08 | RBL07.139 | E |
| WC030699.15 | RBL99.097 | E | NM031507.09 | RBL07.140 | E |
| WC030699.16 | RBL99.098 | E | NM031507.10 | RBL07.141 | E |
| WC030699.17 | RBL99.099 | B | NM031507.11 | RBL07.142 | C |
| WC030699.18 | RBL99.100 | E | NM031507.12 | RBL07.143 | E |
| WC030699.19 | RBL99.101 | E | NM031507.13 | RBL07.144 | E |
| WC030699.20 | RBL99.102 | B | NM031507.14 | RBL07.145 | E |
| WC030699.21 | RBL99.103 | E | NM031507.15 | RBL07.146 | E |
| WC030699.22 | RBL99.104 | E | NM031507.16 | RBL07.147 | R |
| WC030699.23 | RBL99.105 | M | NM031507.17 | RBL07.148 | E |
| WC030699.24 | RBL99.106 | F | NM031507.18 | RBL07.149 | S |
| WC030699.25 | RBL99.107 | E | NM031507.19 | RBL07.150 | E |
| TC030699.01 | RBL99.108 | E | NM031507.20 | RBL07.151 | E |
| TC030699.02 | RBL99.109 | E | NM031507.21 | RBL07.152 | E |
| TC030699.03 | RBL99.110 | E | NM031507.22 | RBL07.153 | E |
| TC030699.04 | RBL99.111 | E | NM031507.23 | RBL07.154 | E |
| TC030699.05 | RBL99.112 | E | NM031507.24 | RBL07.155 | E |
| TC030699.06 | RBL99.113 | E | NM031507.25 | RBL07.156 | E |
| TC030699.07 | RBL99.114 | E | NM022307.01 | RBL07.157 | E |
| TC030699.08 | RBL99.115 | R | NM022307.02 | RBL07.158 | E |
| TC030699.09 | RBL99.116 | E | NM022307.03 | RBL07.159 | E |

|             |           |   |             |           |    |
|-------------|-----------|---|-------------|-----------|----|
| TC030699.11 | RBL99.118 | E | NM022307.04 | RBL07.160 | R  |
| TC030699.12 | RBL99.119 | E | NM022307.05 | RBL07.161 | Q  |
| TC030699.13 | RBL99.120 | E | TC031407.01 | RBL07.162 | E  |
| TC030699.14 | RBL99.121 | E | TC031407.02 | RBL07.163 | E  |
| TC030699.15 | RBL99.122 | E | TC031407.03 | RBL07.164 | E  |
| TC030699.16 | RBL99.123 | E | TC031407.04 | RBL07.165 | CC |
| TC030699.17 | RBL99.124 | E | TC031407.05 | RBL07.166 | R  |
| TC030699.18 | RBL99.125 | E | TC031407.06 | RBL07.167 | E  |
| TC030699.19 | RBL99.126 | E | TC031407.07 | RBL07.168 | C  |
| TC030699.20 | RBL99.127 | E | TC031407.08 | RBL07.169 | E  |
| TC030699.21 | RBL99.128 | R | TC031407.09 | RBL07.170 | E  |
| TC030699.22 | RBL99.129 | E | TC031407.10 | RBL07.171 | R  |
| TC030699.23 | RBL99.130 | E | TC031407.11 | RBL07.172 | E  |
| TC030699.24 | RBL99.131 | E | TC031407.12 | RBL07.173 | E  |
| TC030699.25 | RBL99.132 | E | TC031407.13 | RBL07.174 | E  |
| TC030699.26 | RBL99.133 | E | TC031407.14 | RBL07.175 | R  |
| YC030699.01 | RBL99.134 | B | TC031407.15 | RBL07.176 | E  |
| YC030699.02 | RBL99.135 | E | TC031407.16 | RBL07.177 | E  |
| YC030699.03 | RBL99.136 | E | TC031407.17 | RBL07.178 | E  |
| YC030699.04 | RBL99.137 | B | TC031407.18 | RBL07.179 | E  |
| YC030699.05 | RBL99.138 | E | TC031407.19 | RBL07.180 | E  |
| YC030699.06 | RBL99.139 | E | TC031407.20 | RBL07.181 | R  |
| YC030699.07 | RBL99.140 | B | TC031407.21 | RBL07.182 | E  |
| YC030699.08 | RBL99.141 | F | TC031407.22 | RBL07.183 | F  |
| YC030699.09 | RBL99.142 | E | TC031407.23 | RBL07.184 | E  |
| YC030699.10 | RBL99.143 | R | TC031407.24 | RBL07.185 | E  |
| YC030699.11 | RBL99.144 | E | TC031407.25 | RBL07.186 | E  |
| YC030699.12 | RBL99.145 | R | TC020707.01 | RBL07.187 | E  |
| YC030699.13 | RBL99.146 | W | TC020707.02 | RBL07.188 | E  |
| YC030699.14 | RBL99.147 | J | TC020707.03 | RBL07.189 | B  |
| YC030699.15 | RBL99.148 | S | TC020707.04 | RBL07.190 | E  |
| YC030699.16 | RBL99.149 | E | TC020707.05 | RBL07.191 | E  |
| YC030699.17 | RBL99.150 | S | TC020707.06 | RBL07.192 | E  |
| YC030699.18 | RBL99.151 | S | TC020707.07 | RBL07.193 | E  |
| YC030699.19 | RBL99.152 | E | TC020707.08 | RBL07.194 | E  |
| YC030699.20 | RBL99.153 | W | TC020707.09 | RBL07.195 | E  |
| YC030699.21 | RBL99.154 | E | TC020707.10 | RBL07.196 | S  |
| YC030699.22 | RBL99.155 | E | TC020707.11 | RBL07.197 | S  |
| YC030699.23 | RBL99.156 | B | TC020707.12 | RBL07.198 | E  |
| YC030699.24 | RBL99.157 | R | TC020707.13 | RBL07.199 | E  |
| YC030699.25 | RBL99.158 | E | TC020707.14 | RBL07.200 | S  |

|             |           |   |             |           |    |
|-------------|-----------|---|-------------|-----------|----|
| YC031699.01 | RBL99.159 | E | TC020707.15 | RBL07.201 | S  |
| YC031699.02 | RBL99.160 | R | TC020707.16 | RBL07.202 | S  |
| YC031699.03 | RBL99.161 | E | TC020707.17 | RBL07.203 | E  |
| YC031699.04 | RBL99.162 | E | TC020707.18 | RBL07.204 | E  |
| YC031699.06 | RBL99.164 | E | TC020707.19 | RBL07.205 | E  |
| YC031699.07 | RBL99.165 | E | TC020707.20 | RBL07.206 | E  |
| YC031699.08 | RBL99.166 | E | TC020707.21 | RBL07.207 | B  |
| YC031699.09 | RBL99.167 | E | TC020707.22 | RBL07.208 | A  |
| YC031699.10 | RBL99.168 | E | TC020707.23 | RBL07.209 | E  |
| YC031699.11 | RBL99.169 | E | TC020707.24 | RBL07.210 | A  |
| YC031699.12 | RBL99.170 | E | TC020707.25 | RBL07.211 | B  |
| YC031699.13 | RBL99.171 | E | TC022007.01 | RBL07.212 | O  |
| YC031699.14 | RBL99.172 | E | TC022007.02 | RBL07.213 | B  |
| YC031699.15 | RBL99.173 | E | TC022007.03 | RBL07.214 | E  |
| YC031699.16 | RBL99.174 | E | TC022007.04 | RBL07.215 | R  |
| YC031699.17 | RBL99.175 | B | TC022007.05 | RBL07.216 | R  |
| YC031699.18 | RBL99.176 | E | TC022007.06 | RBL07.217 | E  |
| YC031699.19 | RBL99.177 | F | TC022007.07 | RBL07.218 | B  |
| YC031699.20 | RBL99.178 | E | TC022007.08 | RBL07.219 | B  |
| YC031699.21 | RBL99.179 | E | TC022007.09 | RBL07.220 | B  |
| YC031699.22 | RBL99.180 | E | TC022007.10 | RBL07.221 | A  |
| YC031699.23 | RBL99.181 | E | TC022007.11 | RBL07.222 | E  |
| YC031699.24 | RBL99.182 | E | TC022007.12 | RBL07.223 | E  |
| YC031699.25 | RBL99.183 | F | TC022007.13 | RBL07.224 | E  |
| YC031699.26 | RBL99.184 | E | TC022007.14 | RBL07.225 | S  |
| WC031899.02 | RBL99.187 | E | TC022007.15 | RBL07.226 | S  |
| WC031899.03 | RBL99.188 | E | TC022007.16 | RBL07.227 | S  |
| WC031899.04 | RBL99.189 | E | TC022007.17 | RBL07.228 | BB |
| WC031899.05 | RBL99.190 | E | TC022007.18 | RBL07.229 | E  |
| WC031899.06 | RBL99.191 | E | TC022007.19 | RBL07.230 | E  |
| WC031899.07 | RBL99.192 | E | TC022007.20 | RBL07.231 | E  |
| WC031899.08 | RBL99.193 | E | TC022007.21 | RBL07.232 | R  |
| WC031899.09 | RBL99.194 | E | TC022007.22 | RBL07.233 | A  |
| WC031899.10 | RBL99.195 | E | TC022007.23 | RBL07.234 | E  |
| WC031899.11 | RBL99.196 | E | CC031407.01 | RBL07.235 | F  |
| WC031899.12 | RBL99.197 | E | CC031407.02 | RBL07.236 | E  |
| WC031899.13 | RBL99.198 | B | CC031407.03 | RBL07.237 | E  |
| WC031899.14 | RBL99.199 | F | CC031407.04 | RBL07.238 | E  |
| WC031899.15 | RBL99.200 | E | CC031407.05 | RBL07.239 | B  |
| WC031899.16 | RBL99.201 | E | CC031407.06 | RBL07.240 | E  |
| WC031899.17 | RBL99.202 | P | CC031407.07 | RBL07.241 | E  |

|             |           |   |             |           |    |
|-------------|-----------|---|-------------|-----------|----|
| WC031899.19 | RBL99.204 | E | CC031407.08 | RBL07.242 | E  |
| WC031899.20 | RBL99.205 | E | CC031407.09 | RBL07.243 | C  |
| WC031899.21 | RBL99.206 | E | CC031407.10 | RBL07.244 | S  |
| WC031899.22 | RBL99.207 | E | CC031407.11 | RBL07.245 | E  |
| WC031899.23 | RBL99.208 | E | CC031407.12 | RBL07.246 | E  |
| WC031899.24 | RBL99.209 | E | CC031407.13 | RBL07.247 | E  |
| WC031899.25 | RBL99.210 | E | CC031407.14 | RBL07.248 | E  |
| WC031899.26 | RBL99.211 | E | CC031407.15 | RBL07.249 | BB |
| HH031899.01 | RBL99.212 | R | CC031407.16 | RBL07.250 | E  |
| HH031899.02 | RBL99.213 | E | CC031407.17 | RBL07.251 | J  |
| HH031899.03 | RBL99.214 | E | CC031407.18 | RBL07.252 | E  |
| HH031899.04 | RBL99.215 | E | CC031407.19 | RBL07.253 | E  |
| HH031899.05 | RBL99.216 | B | CC031407.20 | RBL07.254 | E  |
| HH031899.06 | RBL99.217 | E | CC031407.21 | RBL07.255 | E  |
| HH031899.07 | RBL99.218 | S | CC031407.22 | RBL07.256 | E  |
| HH031899.08 | RBL99.219 | E | CC031407.23 | RBL07.257 | E  |
| HH031899.09 | RBL99.220 | B | CC031407.24 | RBL07.258 | R  |
| HH031899.10 | RBL99.221 | B | CC031407.25 | RBL07.259 | E  |
| HH031899.11 | RBL99.222 | E | WC040507.01 | RBL07.260 | E  |
| HH031899.12 | RBL99.223 | E | WC040507.02 | RBL07.261 | C  |
| HH031899.13 | RBL99.224 | E | WC040507.03 | RBL07.262 | E  |
| HH031899.14 | RBL99.225 | E | WC040507.04 | RBL07.263 | E  |
| HH031899.15 | RBL99.226 | E | WC040507.05 | RBL07.264 | E  |
| HH031899.16 | RBL99.227 | S | WC040507.06 | RBL07.265 | E  |
| HH031899.17 | RBL99.228 | S | WC040507.07 | RBL07.266 | E  |
| HH031899.18 | RBL99.229 | E | WC040507.08 | RBL07.267 | j  |
| HH031899.19 | RBL99.230 | E | WC040507.09 | RBL07.268 | E  |
| HH031899.20 | RBL99.231 | E | WC040507.10 | RBL07.269 | R  |
| HH031899.21 | RBL99.232 | R | WC040507.11 | RBL07.270 | E  |
| HH031899.22 | RBL99.233 | B | WC040507.12 | RBL07.271 | E  |
| HH031899.23 | RBL99.234 | F | WC040507.13 | RBL07.272 | E  |
| HH031899.24 | RBL99.235 | E | WC040507.14 | RBL07.273 | S  |
| HH031899.25 | RBL99.236 | E | WC040507.15 | RBL07.274 | E  |
| HH031899.26 | RBL99.237 | E | WC040507.16 | RBL07.275 | E  |
| TC031899.01 | RBL99.238 | E | WC040507.17 | RBL07.276 | E  |
| TC031899.02 | RBL99.239 | E | WC040507.18 | RBL07.277 | S  |
| TC031899.03 | RBL99.240 | P | WC040507.19 | RBL07.278 | M  |
| TC031899.04 | RBL99.241 | E | WC040507.20 | RBL07.279 | E  |
| TC031899.05 | RBL99.242 | E | WC040507.21 | RBL07.280 | E  |
| TC031899.06 | RBL99.243 | B | WC040507.22 | RBL07.281 | E  |
| TC031899.07 | RBL99.244 | F | WC040507.23 | RBL07.282 | E  |

|             |           |   |             |           |   |
|-------------|-----------|---|-------------|-----------|---|
| TC031899.08 | RBL99.245 | E | WC040507.24 | RBL07.283 | A |
| TC031899.09 | RBL99.246 | B | WC040507.25 | RBL07.284 | E |
| TC031899.10 | RBL99.247 | E | WC041707.01 | RBL07.285 | B |
| TC031899.11 | RBL99.248 | E | WC041707.02 | RBL07.286 | S |
| TC031899.12 | RBL99.249 | E | WC041707.03 | RBL07.287 | E |
| TC031899.13 | RBL99.250 | S | WC041707.04 | RBL07.288 | K |
| TC031899.14 | RBL99.251 | E | WC041707.05 | RBL07.289 | E |
| TC031899.15 | RBL99.252 | E | WC041707.06 | RBL07.290 | E |
| TC031899.16 | RBL99.253 | R | WC041707.07 | RBL07.291 | E |
| TC031899.17 | RBL99.254 | E | WC041707.08 | RBL07.292 | E |
| TC031899.18 | RBL99.255 | B | WC041707.09 | RBL07.293 | S |
| TC031899.19 | RBL99.256 | F | WC041707.10 | RBL07.294 | R |
| TC031899.20 | RBL99.257 | E | WC041707.11 | RBL07.295 | E |
| TC031899.21 | RBL99.258 | E | WC041707.12 | RBL07.296 | E |
| TC031899.22 | RBL99.259 | E | WC041707.13 | RBL07.297 | E |
| TC031899.23 | RBL99.260 | F | WC041707.14 | RBL07.298 | E |
| TC031899.24 | RBL99.261 | E | WC041707.15 | RBL07.299 | G |
| TC031899.25 | RBL99.262 | P | WC041707.16 | RBL07.300 | E |
| TC031899.26 | RBL99.263 | E | WC041707.17 | RBL07.301 | E |
| HH040299.01 | RBL99.264 | E | WC041707.18 | RBL07.302 | E |
| HH040299.04 | RBL99.267 | G | WC041707.19 | RBL07.303 | E |
| HH040299.05 | RBL99.268 | G | WC041707.20 | RBL07.304 | E |
| HH040299.06 | RBL99.269 | E | WC041707.21 | RBL07.305 | E |
| HH040299.07 | RBL99.270 | E | WC041707.22 | RBL07.306 | S |
| HH040299.08 | RBL99.271 | E | WC041707.23 | RBL07.307 | S |
| HH040299.09 | RBL99.272 | E | WC041707.24 | RBL07.308 | U |
| HH040299.10 | RBL99.273 | E | WC041707.25 | RBL07.309 | S |
| TC040299.01 | RBL99.274 | E | TC020508.01 | RBL08.001 | E |
| TC040299.02 | RBL99.275 | B | TC020508.02 | RBL08.002 | E |
| TC040299.03 | RBL99.276 | R | TC020508.03 | RBL08.003 | A |
| TC040299.04 | RBL99.277 | F | TC020508.04 | RBL08.004 | E |
| TC040299.05 | RBL99.278 | U | TC020508.05 | RBL08.005 | S |
| TC040299.06 | RBL99.279 | E | TC020508.06 | RBL08.006 | E |
| TC040299.07 | RBL99.280 | E | TC020508.07 | RBL08.007 | E |
| TC040299.08 | RBL99.281 | F | TC020508.08 | RBL08.008 | E |
| TC040299.09 | RBL99.282 | N | TC020508.09 | RBL08.009 | E |
| TC040299.10 | RBL99.283 | E | TC020508.10 | RBL08.010 | F |
| TC040299.11 | RBL99.284 | N | TC020508.11 | RBL08.011 | E |
| TC040299.12 | RBL99.285 | E | TC020508.12 | RBL08.012 | E |
| TC040299.13 | RBL99.286 | E | TC020508.13 | RBL08.013 | E |
| TC040299.14 | RBL99.287 | E | TC020508.14 | RBL08.014 | E |

|             |           |   |             |           |   |
|-------------|-----------|---|-------------|-----------|---|
| TC040299.15 | RBL99.288 | E | TC020508.15 | RBL08.015 | A |
| TC040299.16 | RBL99.289 | E | TC020508.16 | RBL08.016 | E |
| TC040299.17 | RBL99.290 | E | TC020508.17 | RBL08.017 | A |
| TC040299.18 | RBL99.291 | E | TC020508.18 | RBL08.018 | B |
| TC040299.19 | RBL99.292 | B | TC020508.19 | RBL08.019 | B |
| TC040299.20 | RBL99.293 | S | TC020508.20 | RBL08.020 | E |
| TC040299.21 | RBL99.294 | R | TC020508.21 | RBL08.021 | E |
| TC040299.22 | RBL99.295 | R | TC020508.22 | RBL08.022 | E |
| TC040299.23 | RBL99.296 | R | TC020508.23 | RBL08.023 | E |
| TC040299.24 | RBL99.297 | E | TC020508.24 | RBL08.024 | B |
| TC040299.25 | RBL99.298 | U | TC020508.25 | RBL08.025 | E |
| HF02150001  | RBL00.001 | B | NM020508.01 | RBL08.026 | E |
| HF02150002  | RBL00.002 | E | NM020508.02 | RBL08.027 | S |
| HF02150003  | RBL00.003 | R | NM020508.03 | RBL08.028 | E |
| HF02150004  | RBL00.004 | F | NM020508.04 | RBL08.029 | E |
| HF02150005  | RBL00.005 | E | NM020508.05 | RBL08.030 | R |
| HF02150006  | RBL00.006 | E | NM020508.06 | RBL08.031 | E |
| HF02150007  | RBL00.007 | E | NM020508.07 | RBL08.032 | E |
| HF02150008  | RBL00.008 | E | NM020508.08 | RBL08.033 | E |
| HF02150009  | RBL00.009 | E | NM020508.09 | RBL08.034 | E |
| HF02150010  | RBL00.010 | E | NM020508.10 | RBL08.035 | E |
| HF02150011  | RBL00.011 | E | NM020508.11 | RBL08.036 | H |
| HF02150012  | RBL00.012 | B | NM020508.12 | RBL08.037 | G |
| HF02150013  | RBL00.013 | E | NM020508.13 | RBL08.038 | P |
| HF02150014  | RBL00.014 | B | NM020508.14 | RBL08.039 | E |
| HF02150015  | RBL00.015 | S | NM020508.15 | RBL08.040 | E |
| HF02150016  | RBL00.016 | S | NM020508.16 | RBL08.041 | E |
| HF02150017  | RBL00.017 | S | NM020508.17 | RBL08.042 | B |
| HF02150019  | RBL00.018 | S | NM020508.18 | RBL08.043 | B |
| HF02150020  | RBL00.019 | E | NM020508.19 | RBL08.044 | H |
| HF02150021  | RBL00.021 | E | NM020508.20 | RBL08.045 | E |
| HF02150022  | RBL00.022 | S | NM020508.21 | RBL08.046 | S |
| HF02150023  | RBL00.023 | S | NM020508.22 | RBL08.047 | Z |
| HF02150024  | RBL00.024 | B | NM020508.23 | RBL08.048 | E |
| HF02150025  | RBL00.025 | E | NM020508.24 | RBL08.049 | R |
| TC02150001  | RBL00.026 | A | NM020508.25 | RBL08.050 | C |
| TC02150002  | RBL00.027 | R | YC020608.01 | RBL08.051 | E |
| TC02150003  | RBL00.028 | B | YC020608.02 | RBL08.052 | F |
| TC02150004  | RBL00.029 | B | YC020608.03 | RBL08.053 | E |
| TC02150005  | RBL00.030 | R | YC020608.04 | RBL08.054 | E |
| TC02150006  | RBL00.031 | E | YC020608.05 | RBL08.055 | R |



|            |           |   |             |           |   |
|------------|-----------|---|-------------|-----------|---|
| TC02150007 | RBL00.032 | E | YC020608.06 | RBL08.056 | B |
| TC02150008 | RBL00.033 | B | YC020608.07 | RBL08.057 | E |
| TC02150009 | RBL00.034 | B | YC020608.08 | RBL08.058 | E |
| TC02150010 | RBL00.035 | E | YC020608.09 | RBL08.059 | E |
| TC02150011 | RBL00.036 | R | YC020608.10 | RBL08.060 | E |
| TC02150012 | RBL00.037 | R | YC020608.11 | RBL08.061 | E |
| TC02150013 | RBL00.038 | A | YC020608.12 | RBL08.062 | R |
| TC02150015 | RBL00.040 | A | YC020608.13 | RBL08.063 | C |
| TC02150016 | RBL00.041 | E | YC020608.14 | RBL08.064 | E |
| TC02150017 | RBL00.042 | B | YC020608.15 | RBL08.065 | E |
| TC02150018 | RBL00.043 | E | YC020608.16 | RBL08.066 | R |
| TC02150019 | RBL00.044 | E | YC020608.17 | RBL08.067 | E |
| TC02150020 | RBL00.045 | B | YC020608.18 | RBL08.068 | E |
| TC02150021 | RBL00.046 | E | YC020608.19 | RBL08.069 | C |
| TC02150022 | RBL00.047 | E | YC020608.20 | RBL08.070 | E |
| TC02150023 | RBL00.048 | E | YC020608.21 | RBL08.071 | F |
| TC02150024 | RBL00.049 | B | YC020608.22 | RBL08.072 | S |
| TC02150025 | RBL00.050 | E | YC020608.23 | RBL08.073 | E |
| WC02150001 | RBL00.051 | E | YC020608.24 | RBL08.074 | E |
| WC02150002 | RBL00.052 | E | YC020608.25 | RBL08.075 | E |
| WC02150003 | RBL00.053 | J | YC021908.01 | RBL08.076 | E |
| WC02150004 | RBL00.054 | E | YC021908.02 | RBL08.077 | E |
| WC02150005 | RBL00.055 | E | YC021908.03 | RBL08.078 | R |
| YC02150001 | RBL00.056 | E | YC021908.04 | RBL08.079 | E |
| YC02150002 | RBL00.057 | E | YC021908.05 | RBL08.080 | K |
| YC02150003 | RBL00.058 | E | YC021908.06 | RBL08.081 | C |
| YC02150004 | RBL00.059 | B | YC021908.07 | RBL08.082 | H |
| YC02150005 | RBL00.060 | M | YC021908.08 | RBL08.083 | E |
| YC02150006 | RBL00.061 | E | YC021908.09 | RBL08.084 | E |
| YC02150007 | RBL00.062 | H | YC021908.10 | RBL08.085 | f |
| YC02150008 | RBL00.063 | M | YC021908.11 | RBL08.086 | R |
| YC02150009 | RBL00.064 | R | YC021908.12 | RBL08.087 | E |
| YC02150010 | RBL00.065 | E | YC021908.13 | RBL08.088 | A |
| YC02150011 | RBL00.066 | E | YC021908.14 | RBL08.089 | H |
| YC02150012 | RBL00.067 | E | YC021908.15 | RBL08.090 | E |
| YC02150013 | RBL00.068 | E | YC021908.16 | RBL08.091 | E |
| YC02150014 | RBL00.069 | E | YC021908.17 | RBL08.092 | E |
| YC02150015 | RBL00.070 | E | YC021908.18 | RBL08.093 | V |
| YC02150016 | RBL00.071 | E | YC021908.19 | RBL08.094 | E |
| YC02150017 | RBL00.072 | E | YC021908.20 | RBL08.095 | A |
| YC02150018 | RBL00.073 | E | YC021908.21 | RBL08.096 | E |

|            |           |   |             |           |   |
|------------|-----------|---|-------------|-----------|---|
| YC02150019 | RBL00.074 | P | TC022008.01 | RBL08.097 | E |
| YC02150020 | RBL00.075 | H | TC022008.02 | RBL08.098 | E |
| YC02150021 | RBL00.076 | E | TC022008.03 | RBL08.099 | E |
| YC02150022 | RBL00.077 | E | TC022008.04 | RBL08.100 | E |
| YC02150023 | RBL00.078 | M | TC022008.05 | RBL08.101 | R |
| YC02150024 | RBL00.079 | M | TC022008.06 | RBL08.102 | E |
| YC02150025 | RBL00.080 | E | TC022008.07 | RBL08.103 | E |
| HF02290001 | RBL00.081 | U | TC022008.08 | RBL08.104 | E |
| HF02290002 | RBL00.082 | A | TC022008.09 | RBL08.105 | E |
| HF02290003 | RBL00.083 | E | TC022008.10 | RBL08.106 | A |
| HF02290004 | RBL00.084 | B | TC022008.11 | RBL08.107 | E |
| HF02290005 | RBL00.085 | A | TC022008.12 | RBL08.108 | A |
| HF02290006 | RBL00.086 | G | TC022008.13 | RBL08.109 | E |
| HF02290007 | RBL00.087 | E | TC022008.14 | RBL08.110 | E |
| HF02290008 | RBL00.088 | E | TC022008.15 | RBL08.111 | E |
| HF02290009 | RBL00.089 | G | TC022008.16 | RBL08.112 | E |
| HF02290010 | RBL00.090 | E | TC022008.17 | RBL08.113 | E |
| HF02290011 | RBL00.091 | B | TC022008.18 | RBL08.114 | E |
| HF02290012 | RBL00.092 | E | TC022008.19 | RBL08.115 | S |
| HF02290013 | RBL00.093 | E | TC022008.20 | RBL08.116 | E |
| HF02290014 | RBL00.094 | B | TC022008.21 | RBL08.117 | H |
| HF02290015 | RBL00.095 | E | TC022008.22 | RBL08.118 | E |
| HF02290016 | RBL00.096 | E | TC022008.23 | RBL08.119 | A |
| HF02290017 | RBL00.097 | F | TC022008.24 | RBL08.120 | S |
| HF02290018 | RBL00.098 | B | TC022008.25 | RBL08.121 | S |
| HF02290019 | RBL00.099 | E | NM022608.01 | RBL08.122 | A |
| HF02290020 | RBL00.100 | E | NM022608.02 | RBL08.123 | B |
| HF02290021 | RBL00.101 | E | NM022608.03 | RBL08.124 | E |
| HF02290022 | RBL00.102 | E | NM022608.04 | RBL08.125 | E |
| HF02290023 | RBL00.103 | T | NM022608.05 | RBL08.126 | B |
| HF02290024 | RBL00.104 | E | NM022608.06 | RBL08.127 | E |
| HF02290025 | RBL00.105 | E | NM022608.07 | RBL08.128 | K |
| TC02290001 | RBL00.106 | E | NM022608.08 | RBL08.129 | E |
| TC02290002 | RBL00.107 | A | NM022608.09 | RBL08.130 | E |
| TC02290003 | RBL00.108 | B | NM022608.10 | RBL08.131 | E |
| TC02290004 | RBL00.109 | F | NM022608.11 | RBL08.132 | E |
| TC02290005 | RBL00.110 | E | NM022608.12 | RBL08.133 | C |
| TC02290006 | RBL00.111 | E | NM022608.13 | RBL08.134 | E |
| TC02290007 | RBL00.112 | E | NM022608.14 | RBL08.135 | E |
| TC02290008 | RBL00.113 | A | NM022608.15 | RBL08.136 | E |
| TC02290009 | RBL00.114 | E | NM022608.16 | RBL08.137 | A |

|            |           |   |             |           |   |
|------------|-----------|---|-------------|-----------|---|
| TC02290010 | RBL00.115 | E | NM022608.17 | RBL08.138 | C |
| TC02290011 | RBL00.116 | A | NM022608.18 | RBL08.139 | A |
| TC02290012 | RBL00.117 | E | NM022608.19 | RBL08.140 | E |
| TC02290013 | RBL00.118 | E | NM022608.20 | RBL08.141 | E |
| TC02290014 | RBL00.119 | S | NM022608.21 | RBL08.142 | E |
| TC02290015 | RBL00.120 | A | NM022608.22 | RBL08.143 | E |
| TC02290016 | RBL00.121 | E | NM022608.23 | RBL08.144 | F |
| TC02290017 | RBL00.122 | U | NM022608.24 | RBL08.145 | E |
| TC02290018 | RBL00.123 | S | NM022608.25 | RBL08.146 | E |
| TC02290019 | RBL00.124 | A | NM030308.01 | RBL08.147 | E |
| TC02290020 | RBL00.125 | S | NM030308.02 | RBL08.148 | E |
| TC02290021 | RBL00.126 | S | NM030308.03 | RBL08.149 | F |
| TC02290022 | RBL00.127 | J | NM030308.04 | RBL08.150 | E |
| TC02290023 | RBL00.128 | E | NM030308.05 | RBL08.151 | E |
| TC02290024 | RBL00.129 | E | NM030308.06 | RBL08.152 | E |
| TC02290025 | RBL00.130 | E | NM030308.07 | RBL08.153 | E |
| WC02290001 | RBL00.131 | V | NM030308.08 | RBL08.154 | E |
| WC02290002 | RBL00.132 | E | NM030308.09 | RBL08.155 | E |
| WC02290003 | RBL00.133 | E | NM030308.10 | RBL08.156 | E |
| WC02290004 | RBL00.134 | E | NM030308.11 | RBL08.157 | E |
| WC02290005 | RBL00.135 | E | NM030308.12 | RBL08.158 | A |
| WC02290006 | RBL00.136 | E | NM030308.13 | RBL08.159 | E |
| WC02290007 | RBL00.137 | R | NM030308.14 | RBL08.160 | E |
| WC02290008 | RBL00.138 | E | NM030308.15 | RBL08.161 | Z |
| WC02290009 | RBL00.139 | E | NM030308.16 | RBL08.162 | E |
| WC02290010 | RBL00.140 | M | NM030308.17 | RBL08.163 | A |
| WC02290011 | RBL00.141 | E | NM030308.18 | RBL08.164 | E |
| WC02290012 | RBL00.142 | E | NM030308.19 | RBL08.165 | J |
| WC02290013 | RBL00.143 | E | NM030308.20 | RBL08.166 | R |
| WC02290014 | RBL00.144 | E | NM030308.21 | RBL08.167 | E |
| WC02290015 | RBL00.145 | B | NM030308.22 | RBL08.168 | E |
| WC02290016 | RBL00.146 | E | NM030308.23 | RBL08.169 | P |
| WC02290017 | RBL00.147 | E | NM030308.24 | RBL08.170 | E |
| WC02290018 | RBL00.148 | E | NM030308.25 | RBL08.171 | A |
| WC02290019 | RBL00.149 | E | YC030408.01 | RBL08.172 | E |
| WC02290020 | RBL00.150 | M | YC030408.02 | RBL08.173 | S |
| WC02290021 | RBL00.151 | E | YC030408.03 | RBL08.174 | E |
| WC02290022 | RBL00.152 | E | YC030408.04 | RBL08.175 | E |
| WC02290023 | RBL00.153 | E | YC030408.05 | RBL08.176 | E |
| WC02290024 | RBL00.154 | E | YC030408.06 | RBL08.177 | E |
| WC02290025 | RBL00.155 | V | YC030408.07 | RBL08.178 | E |

|            |           |   |             |           |    |
|------------|-----------|---|-------------|-----------|----|
| YC02290001 | RBL00.156 | E | YC030408.08 | RBL08.179 | E  |
| YC02290002 | RBL00.157 | E | YC030408.09 | RBL08.180 | E  |
| YC02290003 | RBL00.158 | B | YC030408.10 | RBL08.181 | E  |
| YC02290004 | RBL00.159 | E | YC030408.11 | RBL08.182 | E  |
| YC02290005 | RBL00.160 | E | YC030408.12 | RBL08.183 | E  |
| YC02290006 | RBL00.161 | E | YC030408.13 | RBL08.184 | E  |
| YC02290007 | RBL00.162 | E | YC030408.14 | RBL08.185 | E  |
| YC02290008 | RBL00.163 | U | YC030408.15 | RBL08.186 | E  |
| YC02290009 | RBL00.164 | B | YC030408.16 | RBL08.187 | E  |
| YC02290010 | RBL00.165 | E | YC030408.17 | RBL08.188 | E  |
| YC02290011 | RBL00.166 | E | YC030408.18 | RBL08.189 | E  |
| YC02290012 | RBL00.167 | E | YC030408.19 | RBL08.190 | R  |
| YC02290013 | RBL00.168 | E | YC030408.20 | RBL08.191 | E  |
| YC02290014 | RBL00.169 | E | YC030408.21 | RBL08.192 | E  |
| YC02290015 | RBL00.170 | E | YC030408.22 | RBL08.193 | S  |
| YC02290016 | RBL00.171 | E | YC030408.23 | RBL08.194 | R  |
| YC02290017 | RBL00.172 | B | YC030408.24 | RBL08.195 | E  |
| YC02290018 | RBL00.173 | R | YC030408.25 | RBL08.196 | E  |
| YC02290019 | RBL00.174 | E | TC030408.01 | RBL08.197 | C  |
| YC02290020 | RBL00.175 | E | TC030408.02 | RBL08.198 | S  |
| YC02290021 | RBL00.176 | E | TC030408.03 | RBL08.199 | E  |
| YC02290022 | RBL00.177 | E | TC030408.04 | RBL08.200 | A  |
| YC02290023 | RBL00.178 | E | TC030408.05 | RBL08.201 | E  |
| YC02290024 | RBL00.179 | E | TC030408.06 | RBL08.202 | E  |
| YC02290025 | RBL00.180 | B | TC030408.07 | RBL08.203 | C  |
| HH03160001 | RBL00.181 | E | TC030408.08 | RBL08.204 | D  |
| HH03160002 | RBL00.182 | B | TC030408.09 | RBL08.205 | J  |
| HH03160003 | RBL00.183 | R | TC030408.10 | RBL08.206 | J  |
| HH03160004 | RBL00.184 | E | TC030408.11 | RBL08.207 | E  |
| HH03160005 | RBL00.185 | E | TC030408.12 | RBL08.208 | HH |
| HH03160006 | RBL00.186 | E | TC030408.13 | RBL08.209 | E  |
| HH03160007 | RBL00.187 | R | TC030408.14 | RBL08.210 | D  |
| HH03160008 | RBL00.188 | E | TC030408.15 | RBL08.211 | E  |
| HH03160009 | RBL00.189 | B | TC030408.16 | RBL08.212 | E  |
| HH03160010 | RBL00.190 | E | TC030408.17 | RBL08.213 | E  |
| HH03160011 | RBL00.191 | E | TC030408.18 | RBL08.214 | E  |
| HH03160012 | RBL00.192 | E | TC030408.19 | RBL08.215 | C  |
| HH03160013 | RBL00.193 | R | TC030408.20 | RBL08.216 | E  |
| HH03160014 | RBL00.194 | E | TC030408.21 | RBL08.217 | E  |
| HH03160015 | RBL00.195 | H | TC030408.22 | RBL08.218 | E  |
| HH03160016 | RBL00.196 | E | TC030408.23 | RBL08.219 | E  |

|            |           |   |             |           |   |
|------------|-----------|---|-------------|-----------|---|
| HH03160017 | RBL00.197 | E | TC030408.24 | RBL08.220 | J |
| HH03160018 | RBL00.198 | A | TC030408.25 | RBL08.221 | E |
| HH03160019 | RBL00.199 | E | NM031808.01 | RBL08.222 | E |
| HH03160020 | RBL00.200 | E | NM031808.02 | RBL08.223 | E |
| HH03160022 | RBL00.202 | S | NM031808.03 | RBL08.224 | A |
| HH03160023 | RBL00.203 | E | NM031808.04 | RBL08.225 | E |
| HH03160024 | RBL00.204 | E | NM031808.05 | RBL08.226 | E |
| TC03160001 | RBL00.205 | E | NM031808.06 | RBL08.227 | S |
| TC03160002 | RBL00.206 | P | NM031808.07 | RBL08.228 | S |
| TC03160003 | RBL00.207 | E | NM031808.08 | RBL08.229 | E |
| TC03160005 | RBL00.209 | E | NM031808.09 | RBL08.230 | E |
| TC03160006 | RBL00.210 | E | NM031808.10 | RBL08.231 | F |
| TC03160008 | RBL00.212 | E | NM031808.11 | RBL08.232 | E |
| TC03160009 | RBL00.213 | E | NM031808.12 | RBL08.233 | E |
| TC03160010 | RBL00.214 | A | NM031808.13 | RBL08.234 | E |
| TC03160011 | RBL00.215 | E | NM031808.14 | RBL08.235 | I |
| TC03160012 | RBL00.216 | E | NM031808.15 | RBL08.236 | E |
| TC03160013 | RBL00.217 | U | NM031808.16 | RBL08.237 | E |
| TC03160014 | RBL00.218 | E | NM031808.17 | RBL08.238 | E |
| TC03160015 | RBL00.219 | V | NM031808.18 | RBL08.239 | E |
| TC03160017 | RBL00.221 | E | NM031808.19 | RBL08.240 | E |
| TC03160018 | RBL00.222 | E | NM031808.20 | RBL08.241 | P |
| TC03160019 | RBL00.223 | E | NM031808.21 | RBL08.242 | P |
| TC03160020 | RBL00.224 | E | NM031808.22 | RBL08.243 | E |
| TC03160021 | RBL00.225 | E | NM031808.23 | RBL08.244 | R |
| TC03160022 | RBL00.226 | C | NM031808.24 | RBL08.245 | I |
| TC03160023 | RBL00.227 | E | NM031808.25 | RBL08.246 | E |
| TC03160024 | RBL00.228 | M | TC031808.01 | RBL08.247 | E |
| TC03160025 | RBL00.229 | E | TC031808.02 | RBL08.248 | E |
| WC03160001 | RBL00.230 | E | TC031808.03 | RBL08.249 | R |
| WC03160002 | RBL00.231 | E | TC031808.04 | RBL08.250 | E |
| WC03160003 | RBL00.232 | E | TC031808.05 | RBL08.251 | R |
| WC03160004 | RBL00.233 | C | TC031808.06 | RBL08.252 | R |
| WC03160005 | RBL00.234 | R | TC031808.07 | RBL08.253 | R |
| WC03160006 | RBL00.235 | B | TC031808.08 | RBL08.254 | G |
| WC03160007 | RBL00.236 | E | TC031808.09 | RBL08.255 | E |
| WC03160008 | RBL00.237 | V | TC031808.10 | RBL08.256 | E |
| WC03160009 | RBL00.238 | E | TC031808.11 | RBL08.257 | E |
| WC03160010 | RBL00.239 | E | TC031808.12 | RBL08.258 | E |
| WC03160011 | RBL00.240 | B | TC031808.13 | RBL08.259 | R |
| WC03160012 | RBL00.241 | B | TC031808.14 | RBL08.260 | E |

|            |           |   |             |           |    |
|------------|-----------|---|-------------|-----------|----|
| WC03160013 | RBL00.242 | E | TC031808.15 | RBL08.261 | E  |
| WC03160014 | RBL00.243 | R | TC031808.16 | RBL08.262 | E  |
| WC03160015 | RBL00.244 | B | TC031808.17 | RBL08.263 | R  |
| WC03160016 | RBL00.245 | S | TC031808.18 | RBL08.264 | E  |
| WC03160017 | RBL00.246 | B | TC031808.19 | RBL08.265 | E  |
| WC03160018 | RBL00.247 | B | TC031808.20 | RBL08.266 | E  |
| WC03160019 | RBL00.248 | B | TC031808.21 | RBL08.267 | E  |
| WC03160020 | RBL00.249 | E | TC031808.22 | RBL08.268 | R  |
| WC03160021 | RBL00.250 | E | TC031808.23 | RBL08.269 | F  |
| WC03160022 | RBL00.251 | E | TC031808.24 | RBL08.270 | E  |
| WC03160023 | RBL00.252 | E | TC031808.25 | RBL08.271 | E  |
| WC03160024 | RBL00.253 | J | YC031808.01 | RBL08.272 | E  |
| YC03160001 | RBL00.255 | S | YC031808.02 | RBL08.273 | E  |
| YC03160002 | RBL00.256 | E | YC031808.03 | RBL08.274 | C  |
| YC03160003 | RBL00.257 | E | YC031808.04 | RBL08.275 | E  |
| YC03160004 | RBL00.258 | E | YC031808.05 | RBL08.276 | E  |
| YC03160005 | RBL00.259 | S | YC031808.06 | RBL08.277 | E  |
| YC03160006 | RBL00.260 | E | YC031808.07 | RBL08.278 | E  |
| YC03160007 | RBL00.261 | E | YC031808.08 | RBL08.279 | E  |
| YC03160008 | RBL00.262 | E | YC031808.09 | RBL08.280 | E  |
| YC03160009 | RBL00.263 | E | YC031808.10 | RBL08.281 | E  |
| YC03160010 | RBL00.264 | S | YC031808.11 | RBL08.282 | E  |
| YC03160011 | RBL00.265 | E | YC031808.12 | RBL08.283 | E  |
| YC03160012 | RBL00.266 | R | YC031808.13 | RBL08.284 | E  |
| YC03160013 | RBL00.267 | E | YC031808.14 | RBL08.285 | E  |
| YC03160014 | RBL00.268 | S | YC031808.15 | RBL08.286 | HH |
| YC03160015 | RBL00.269 | E | YC031808.16 | RBL08.287 | E  |
| YC03160016 | RBL00.270 | A | YC031808.17 | RBL08.288 | E  |
| YC03160017 | RBL00.271 | S | YC031808.18 | RBL08.289 | B  |
| YC03160018 | RBL00.272 | E | YC031808.19 | RBL08.290 | E  |
| YC03160019 | RBL00.273 | S | YC031808.20 | RBL08.291 | E  |
| YC03160020 | RBL00.274 | A | YC031808.21 | RBL08.292 | E  |
| YC03160021 | RBL00.275 | A | YC031808.22 | RBL08.293 | F  |
| YC03160022 | RBL00.276 | A | YC031808.23 | RBL08.294 | E  |
| YC03160023 | RBL00.277 | E | YC031808.24 | RBL08.295 | A  |
| YC03160024 | RBL00.278 | F | YC031808.25 | RBL08.296 | R  |
| YC03160025 | RBL00.279 | E | NM033108.01 | RBL08.297 | A  |
| HF03280001 | RBL00.280 | E | NM033108.02 | RBL08.298 | E  |
| HF03280002 | RBL00.281 | E | NM033108.03 | RBL08.299 | E  |
| HF03280003 | RBL00.282 | E | NM033108.04 | RBL08.300 | P  |
| HF03280004 | RBL00.283 | E | NM033108.05 | RBL08.301 | E  |

|            |           |   |             |           |   |
|------------|-----------|---|-------------|-----------|---|
| HF03280005 | RBL00.284 | E | NM033108.06 | RBL08.302 | E |
| HF03280006 | RBL00.285 | E | NM033108.07 | RBL08.303 | V |
| HF03280007 | RBL00.286 | E | NM033108.08 | RBL08.304 | E |
| HF03280008 | RBL00.287 | E | NM033108.09 | RBL08.305 | E |
| HF03280009 | RBL00.288 | E | NM033108.10 | RBL08.306 | E |
| HF03280010 | RBL00.289 | E | NM033108.11 | RBL08.307 | V |
| HF03280011 | RBL00.290 | A | NM033108.12 | RBL08.308 | E |
| HF03280012 | RBL00.291 | R | NM033108.13 | RBL08.309 | E |
| HF03280013 | RBL00.292 | A | NM033108.14 | RBL08.310 | E |
| HF03280014 | RBL00.293 | A | NM033108.15 | RBL08.311 | C |
| HF03280015 | RBL00.294 | E | NM033108.16 | RBL08.312 | Z |
| HF03280016 | RBL00.295 | E | NM033108.17 | RBL08.313 | E |
| HF03280017 | RBL00.296 | S | NM033108.18 | RBL08.314 | E |
| HF03280018 | RBL00.297 | E | NM033108.19 | RBL08.315 | V |
| HF03280019 | RBL00.298 | S | NM033108.20 | RBL08.316 | V |
| HF03280020 | RBL00.299 | E | NM033108.21 | RBL08.317 | E |
| HF03280021 | RBL00.300 | P | NM033108.22 | RBL08.318 | E |
| HF03280022 | RBL00.301 | B | NM033108.23 | RBL08.319 | E |
| HF03280023 | RBL00.302 | B | NM033108.24 | RBL08.320 | E |
| HF03280024 | RBL00.303 | E | NM033108.25 | RBL08.321 | A |
| HF03280025 | RBL00.304 | E | TC033108.01 | RBL08.322 | E |
| TC03280001 | RBL00.305 | E | TC033108.02 | RBL08.323 | E |
| TC03280002 | RBL00.306 | E | TC033108.03 | RBL08.324 | E |
| TC03280003 | RBL00.307 | E | TC033108.04 | RBL08.325 | E |
| TC03280004 | RBL00.308 | E | TC033108.05 | RBL08.326 | E |
| TC03280005 | RBL00.309 | E | TC033108.06 | RBL08.327 | E |
| TC03280006 | RBL00.310 | E | TC033108.07 | RBL08.328 | E |
| TC03280007 | RBL00.311 | W | TC033108.08 | RBL08.329 | E |
| TC03280008 | RBL00.312 | S | TC033108.09 | RBL08.330 | E |
| TC03280009 | RBL00.313 | A | TC033108.10 | RBL08.331 | R |
| TC03280010 | RBL00.314 | E | TC033108.11 | RBL08.332 | P |
| TC03280011 | RBL00.315 | E | TC033108.12 | RBL08.333 | R |
| TC03280012 | RBL00.316 | E | TC033108.13 | RBL08.334 | B |
| TC03280013 | RBL00.317 | E | TC033108.14 | RBL08.335 | R |
| TC03280014 | RBL00.318 | Q | TC033108.15 | RBL08.336 | E |
| TC03280015 | RBL00.319 | E | TC033108.16 | RBL08.337 | E |
| TC03280016 | RBL00.320 | E | TC033108.17 | RBL08.338 | B |
| TC03280017 | RBL00.321 | G | TC033108.18 | RBL08.339 | E |
| TC03280018 | RBL00.322 | U | TC033108.19 | RBL08.340 | C |
| TC03280019 | RBL00.323 | E | TC033108.20 | RBL08.341 | E |
| TC03280020 | RBL00.324 | E | TC033108.21 | RBL08.342 | S |

|            |           |   |             |           |    |
|------------|-----------|---|-------------|-----------|----|
| TC03280021 | RBL00.325 | E | TC033108.22 | RBL08.343 | E  |
| TC03280022 | RBL00.326 | E | TC033108.23 | RBL08.344 | E  |
| TC03280023 | RBL00.327 | E | TC033108.24 | RBL08.345 | E  |
| TC03280024 | RBL00.328 | E | TC033108.25 | RBL08.346 | E  |
| TC03280025 | RBL00.329 | E | YC040108.01 | RBL08.347 | E  |
| WC03280001 | RBL00.330 | E | YC040108.02 | RBL08.348 | E  |
| WC03280002 | RBL00.331 | B | YC040108.03 | RBL08.349 | E  |
| WC03280003 | RBL00.332 | E | YC040108.04 | RBL08.350 | E  |
| WC03280004 | RBL00.333 | E | YC040108.05 | RBL08.351 | E  |
| WC03280005 | RBL00.334 | B | YC040108.06 | RBL08.352 | E  |
| WC03280006 | RBL00.335 | B | YC040108.07 | RBL08.353 | E  |
| WC03280007 | RBL00.336 | E | YC040108.08 | RBL08.354 | O  |
| WC03280008 | RBL00.337 | B | YC040108.09 | RBL08.355 | E  |
| WC03280009 | RBL00.338 | E | YC040108.10 | RBL08.356 | E  |
| WC03280010 | RBL00.339 | E | YC040108.11 | RBL08.357 | E  |
| WC03280011 | RBL00.340 | E | YC040108.12 | RBL08.358 | E  |
| WC03280012 | RBL00.341 | E | YC040108.13 | RBL08.359 | E  |
| WC03280013 | RBL00.342 | E | YC040108.14 | RBL08.360 | E  |
| WC03280014 | RBL00.343 | E | YC040108.15 | RBL08.361 | E  |
| WC03280015 | RBL00.344 | R | YC040108.16 | RBL08.362 | E  |
| WC03280016 | RBL00.345 | E | YC040108.17 | RBL08.363 | E  |
| WC03280017 | RBL00.346 | E | YC040108.18 | RBL08.364 | E  |
| WC03280018 | RBL00.347 | E | YC040108.19 | RBL08.365 | E  |
| WC03280019 | RBL00.348 | B | YC040108.20 | RBL08.366 | E  |
| YC03280001 | RBL00.349 | M | YC040108.21 | RBL08.367 | E  |
| YC03280002 | RBL00.350 | E | YC040108.22 | RBL08.368 | E  |
| YC03280003 | RBL00.351 | E | YC040108.23 | RBL08.369 | E  |
| YC03280004 | RBL00.352 | R | YC040108.24 | RBL08.370 | E  |
| YC03280005 | RBL00.353 | E | YC040108.25 | RBL08.371 | E  |
| YC03280006 | RBL00.354 | B | WC040308.01 | RBL08.372 | BB |
| YC03280007 | RBL00.355 | E | WC040308.02 | RBL08.373 | U  |
| YC03280008 | RBL00.356 | E | WC040308.03 | RBL08.374 | A  |
| YC03280009 | RBL00.357 | C | WC040308.04 | RBL08.375 | E  |
| YC03280010 | RBL00.358 | E | WC040308.05 | RBL08.376 | E  |
| YC03280011 | RBL00.359 | E | WC040308.06 | RBL08.377 | A  |
| YC03280012 | RBL00.360 | E | WC040308.07 | RBL08.378 | E  |
| YC03280013 | RBL00.361 | E | WC040308.08 | RBL08.379 | R  |
| YC03280014 | RBL00.362 | E | WC040308.09 | RBL08.380 | E  |
| YC03280015 | RBL00.363 | E | WC040308.10 | RBL08.381 | B  |
| YC03280016 | RBL00.364 | E | WC040308.11 | RBL08.382 | E  |
| YC03280017 | RBL00.365 | E | WC040308.12 | RBL08.383 | A  |



|            |           |   |             |           |    |
|------------|-----------|---|-------------|-----------|----|
| YC03280018 | RBL00.366 | E | WC040308.13 | RBL08.384 | F  |
| YC03280019 | RBL00.367 | E | WC040308.14 | RBL08.385 | E  |
| YC03280020 | RBL00.368 | E | WC040308.15 | RBL08.386 | E  |
| YC03280021 | RBL00.369 | E | WC040308.16 | RBL08.387 | E  |
| YC03280022 | RBL00.370 | E | WC040308.17 | RBL08.388 | S  |
| YC03280023 | RBL00.371 | E | WC040308.18 | RBL08.389 | J  |
| YC03280024 | RBL00.372 | C | WC040308.19 | RBL08.390 | BB |
| YC03280025 | RBL00.373 | E | WC040308.20 | RBL08.391 | E  |
| WC03050101 | RBL01.001 | B | WC040308.21 | RBL08.392 | E  |
| WC03050102 | RBL01.002 | B | WC040308.22 | RBL08.393 | J  |
| WC03050103 | RBL01.003 | B | WC040308.23 | RBL08.394 | A  |
| WC03050104 | RBL01.004 | B | WC040308.24 | RBL08.395 | R  |
| WC03050105 | RBL01.005 | E | WC040308.25 | RBL08.396 | R  |
| WC03050106 | RBL01.006 | U | YC041408.01 | RBL08.397 | B  |
| WC03050107 | RBL01.007 | E | YC041408.02 | RBL08.398 | E  |
| WC03050108 | RBL01.008 | U | YC041408.03 | RBL08.399 | A  |
| WC03050109 | RBL01.009 | B | YC041408.04 | RBL08.400 | E  |
| WC03050110 | RBL01.010 | B | YC041408.05 | RBL08.401 | A  |
| WC03050112 | RBL01.012 | E | YC041408.06 | RBL08.402 | P  |
| WC03050113 | RBL01.013 | B | YC041408.07 | RBL08.403 | P  |
| WC03050114 | RBL01.014 | E | YC041408.08 | RBL08.404 | A  |
| WC03050115 | RBL01.015 | B | YC041408.09 | RBL08.405 | E  |
| WC03050116 | RBL01.016 | E | YC041408.10 | RBL08.406 | P  |
| WC03050117 | RBL01.017 | B | YC041408.11 | RBL08.407 | E  |
| WC03050118 | RBL01.018 | E | YC041408.12 | RBL08.408 | P  |
| WC03050119 | RBL01.019 | E | YC041408.13 | RBL08.409 | P  |
| WC03050120 | RBL01.020 | E | YC041408.14 | RBL08.410 | E  |
| WC03050121 | RBL01.021 | S | YC041408.15 | RBL08.411 | R  |
| WC03050122 | RBL01.022 | B | YC041408.16 | RBL08.412 | A  |
| WC03050123 | RBL01.023 | E | YC041408.17 | RBL08.413 | A  |
| WC03050124 | RBL01.024 | B | YC041408.18 | RBL08.414 | E  |
| WC03050125 | RBL01.025 | B | YC041408.19 | RBL08.415 | E  |
| NM03060101 | RBL01.026 | E | YC041408.20 | RBL08.416 | E  |
| NM03060102 | RBL01.027 | E | YC041408.21 | RBL08.417 | A  |
| NM03060103 | RBL01.028 | E | YC041408.22 | RBL08.418 | P  |
| NM03060104 | RBL01.029 | O | WC041408.01 | RBL08.419 | E  |
| NM03060105 | RBL01.030 | E | WC041408.02 | RBL08.420 | E  |
| NM03060106 | RBL01.031 | E | WC041408.03 | RBL08.421 | E  |
| NM03060107 | RBL01.032 | A | WC041408.04 | RBL08.422 | S  |
| NM03060108 | RBL01.033 | R | WC041408.05 | RBL08.423 | R  |
| NM03060109 | RBL01.034 | B | WC041408.06 | RBL08.424 | R  |

|            |           |   |             |           |   |
|------------|-----------|---|-------------|-----------|---|
| NM03060110 | RBL01.035 | B | WC041408.07 | RBL08.425 | E |
| NM03060111 | RBL01.036 | E | WC041408.08 | RBL08.426 | R |
| NM03060112 | RBL01.037 | E | WC041408.09 | RBL08.427 | B |
| NM03060113 | RBL01.038 | E | WC041408.10 | RBL08.428 | E |
| NM03060114 | RBL01.039 | E | WC041408.11 | RBL08.429 | R |
| NM03060115 | RBL01.040 | E | WC041408.12 | RBL08.430 | E |
| NM03060116 | RBL01.041 | E | WC041408.13 | RBL08.431 | B |
| NM03060117 | RBL01.042 | E | WC041408.14 | RBL08.432 | S |
| NM03060118 | RBL01.043 | E | WC041408.15 | RBL08.433 | E |
| NM03060119 | RBL01.044 | O | WC041408.16 | RBL08.434 | B |
| NM03060120 | RBL01.045 | E | WC041408.17 | RBL08.435 | E |
| NM03060121 | RBL01.046 | E | WC041408.18 | RBL08.436 | E |
| NM03060122 | RBL01.047 | E | WC041408.19 | RBL08.437 | E |
| NM03060123 | RBL01.048 | E | WC041408.20 | RBL08.438 | B |
| NM03060124 | RBL01.049 | E | WC041408.21 | RBL08.439 | E |
| NM03060125 | RBL01.050 | A | WC041408.22 | RBL08.440 | R |
| TC03150101 | RBL01.051 | S | WC041408.23 | RBL08.441 | E |
| TC03150102 | RBL01.052 | E | WC041408.24 | RBL08.442 | E |
| TC03150103 | RBL01.053 | E | WC041408.25 | RBL08.443 | E |
| TC03150104 | RBL01.054 | E | TC041508.01 | RBL08.444 | E |
| TC03150105 | RBL01.055 | E | TC041508.02 | RBL08.445 | E |
| TC03150106 | RBL01.056 | E | TC041508.03 | RBL08.446 | E |
| TC03150107 | RBL01.057 | E | TC041508.04 | RBL08.447 | E |
| TC03150108 | RBL01.058 | S | TC041508.05 | RBL08.448 | S |
| TC03150109 | RBL01.059 | R | TC041508.06 | RBL08.449 | E |
| TC03150110 | RBL01.060 | E | TC041508.07 | RBL08.450 | E |
| TC03150111 | RBL01.061 | E | TC041508.08 | RBL08.451 | E |
| TC03150112 | RBL01.062 | E | TC041508.09 | RBL08.452 | S |
| TC03150113 | RBL01.063 | E | TC041508.10 | RBL08.453 | E |
| TC03150114 | RBL01.064 | E | TC041508.11 | RBL08.454 | E |
| TC03150115 | RBL01.065 | S | TC041508.12 | RBL08.455 | S |
| TC03150116 | RBL01.066 | E | TC041508.13 | RBL08.456 | S |
| TC03150117 | RBL01.067 | R | TC041508.14 | RBL08.457 | E |
| TC03150118 | RBL01.068 | S | TC041508.15 | RBL08.458 | S |
| TC03150119 | RBL01.069 | B | TC041508.16 | RBL08.459 | S |
| TC03150120 | RBL01.070 | S | TC041508.17 | RBL08.460 | S |
| TC03150121 | RBL01.071 | E | TC041508.18 | RBL08.461 | S |
| TC03150122 | RBL01.072 | E | TC041508.19 | RBL08.462 | E |
| TC03150123 | RBL01.073 | E | TC041508.20 | RBL08.463 | E |
| TC03150124 | RBL01.074 | E | TC041508.22 | RBL08.465 | S |
| TC03150125 | RBL01.075 | E | TC041508.23 | RBL08.466 | E |

|            |           |   |             |           |   |
|------------|-----------|---|-------------|-----------|---|
| TC03150126 | RBL01.076 | A | TC041508.24 | RBL08.467 | S |
| WC03150101 | RBL01.077 | S | TC041508.25 | RBL08.468 | S |
| WC03150102 | RBL01.078 | B | NM042908.01 | RBL08.469 | E |
| WC03150103 | RBL01.079 | E | NM042908.02 | RBL08.470 | E |
| WC03150104 | RBL01.080 | E | NM042908.03 | RBL08.471 | E |
| WC03150105 | RBL01.081 | E | NM042908.04 | RBL08.472 | E |
| WC03150106 | RBL01.082 | B | NM042908.05 | RBL08.473 | S |
| WC03150107 | RBL01.083 | E | NM042908.06 | RBL08.474 | E |
| WC03150108 | RBL01.084 | E | NM042908.07 | RBL08.475 | E |
| WC03150109 | RBL01.085 | E | NM042908.08 | RBL08.476 | E |
| WC03150110 | RBL01.086 | E | NM042908.09 | RBL08.477 | E |
| WC03150111 | RBL01.087 | E | NM042908.10 | RBL08.478 | S |
| WC03150112 | RBL01.088 | E | NM042908.11 | RBL08.479 | E |
| WC03150113 | RBL01.089 | E | NM042908.12 | RBL08.480 | E |
| WC03150114 | RBL01.090 | E | NM042908.13 | RBL08.481 | E |
| WC03150115 | RBL01.091 | V | NM042908.14 | RBL08.482 | E |
| WC03150116 | RBL01.092 | E | NM042908.15 | RBL08.483 | E |
| WC03150117 | RBL01.093 | S | NM042908.16 | RBL08.484 | E |
| WC03150118 | RBL01.094 | E | NM042908.17 | RBL08.485 | E |
| WC03150119 | RBL01.095 | E | NM042908.18 | RBL08.486 | E |
| WC03150120 | RBL01.096 | R | NM042908.19 | RBL08.487 | E |
| WC03150121 | RBL01.097 | E | NM042908.20 | RBL08.488 | E |
| WC03150122 | RBL01.098 | B | NM042908.21 | RBL08.489 | B |
| WC03150123 | RBL01.099 | F | NM042908.22 | RBL08.490 | E |
| WC03150124 | RBL01.100 | E | NM042908.23 | RBL08.491 | E |
| WC03150125 | RBL01.101 | E | NM042908.24 | RBL08.492 | E |
| CL0101     | RBL01.102 | E | NM042908.25 | RBL08.493 | E |
| CL0102     | RBL01.103 | P | WC043008.01 | RBL08.494 | E |
| CL0103     | RBL01.104 | E | WC043008.02 | RBL08.495 | E |
| CL0104     | RBL01.105 | E | WC043008.03 | RBL08.496 | E |
| CL0105     | RBL01.106 | E | WC043008.04 | RBL08.497 | E |
| CL0106     | RBL01.107 | K | WC043008.05 | RBL08.498 | S |
| CL0107     | RBL01.108 | B | WC043008.06 | RBL08.499 | E |
| CL0108     | RBL01.109 | B | WC043008.07 | RBL08.500 | E |
| CL0109     | RBL01.110 | E | WC043008.08 | RBL08.501 | S |
| CL0110     | RBL01.111 | K | WC043008.09 | RBL08.502 | A |
| CL0111     | RBL01.112 | B | WC043008.10 | RBL08.503 | S |
| CL0112     | RBL01.113 | B | WC043008.11 | RBL08.504 | E |
| CL0113     | RBL01.114 | S | WC043008.12 | RBL08.505 | B |
| CL0114     | RBL01.115 | E | WC043008.13 | RBL08.506 | B |
| CL0116     | RBL01.117 | E | WC043008.14 | RBL08.507 | E |

|             |           |   |             |           |   |
|-------------|-----------|---|-------------|-----------|---|
| CL0117      | RBL01.118 | E | WC043008.15 | RBL08.508 | E |
| CL0118      | RBL01.119 | E | WC043008.16 | RBL08.509 | R |
| CL0119      | RBL01.120 | U | WC043008.17 | RBL08.510 | A |
| CL0120      | RBL01.121 | U | WC043008.18 | RBL08.511 | E |
| CL0121      | RBL01.122 | R | WC043008.19 | RBL08.512 | G |
| CL0122      | RBL01.123 | E | WC043008.20 | RBL08.513 | E |
| CL0123      | RBL01.124 | E | WC043008.21 | RBL08.514 | E |
| CL0124      | RBL01.125 | E | WC043008.22 | RBL08.515 | E |
| WC0101      | RBL01.126 | E | WC043008.23 | RBL08.516 | B |
| WC0102      | RBL01.127 | E | WC043008.24 | RBL08.517 | B |
| WC0103      | RBL01.128 | B | WC043008.25 | RBL08.518 | B |
| WC0104      | RBL01.129 | K | YC043008.01 | RBL08.520 | A |
| WC0105      | RBL01.130 | E | YC043008.02 | RBL08.521 | E |
| WC040201.01 | RBL01.131 | R | YC043008.03 | RBL08.522 | E |
| WC040201.02 | RBL01.132 | F | YC043008.04 | RBL08.523 | S |
| WC040201.03 | RBL01.133 | E | YC043008.05 | RBL08.524 | E |
| WC040201.04 | RBL01.134 | E | YC043008.06 | RBL08.525 | A |
| WC040201.05 | RBL01.135 | V | YC043008.07 | RBL08.526 | E |
| WC040201.06 | RBL01.136 | S | YC043008.08 | RBL08.527 | E |
| WC040201.07 | RBL01.137 | F | YC043008.09 | RBL08.528 | A |
| WC040201.08 | RBL01.138 | B | YC043008.10 | RBL08.529 | R |
| WC040201.09 | RBL01.139 | B | YC043008.11 | RBL08.530 | E |
| WC040201.10 | RBL01.140 | E | YC043008.12 | RBL08.531 | A |
| WC040201.11 | RBL01.141 | E | YC043008.13 | RBL08.532 | E |
| WC040201.12 | RBL01.142 | V | YC043008.14 | RBL08.533 | S |
| WC040201.13 | RBL01.143 | S | YC043008.15 | RBL08.534 | S |
| WC040201.14 | RBL01.144 | E | YC043008.16 | RBL08.535 | A |
| WC040201.15 | RBL01.145 | F | YC043008.17 | RBL08.536 | A |
| WC040201.16 | RBL01.146 | F | YC043008.18 | RBL08.537 | A |
| WC040201.17 | RBL01.147 | V | YC043008.19 | RBL08.538 | E |
| WC040201.18 | RBL01.148 | F | YC043008.20 | RBL08.539 | E |
| WC040201.19 | RBL01.149 | E | YC043008.21 | RBL08.540 | E |
| WC040201.20 | RBL01.150 | E | YC043008.22 | RBL08.541 | E |
| WC040201.21 | RBL01.151 | E | YC043008.23 | RBL08.542 | K |
| WC040201.22 | RBL01.152 | F | YC043008.24 | RBL08.543 | K |
| WC040201.23 | RBL01.153 | V | YC043008.25 | RBL08.544 | E |
| WC040201.24 | RBL01.154 | E | LL031008.01 | RBL08.545 | E |
| WC040201.25 | RBL01.155 | M | LL031008.02 | RBL08.546 | E |
| TC040901.01 | RBL01.156 | E | LL031008.03 | RBL08.547 | E |
| TC040901.02 | RBL01.157 | E | LL031008.04 | RBL08.548 | R |
| TC040901.03 | RBL01.158 | R | LL031008.05 | RBL08.549 | E |

|             |           |   |             |           |    |
|-------------|-----------|---|-------------|-----------|----|
| TC040901.04 | RBL01.159 | E | LL031008.06 | RBL08.550 | E  |
| TC040901.05 | RBL01.160 | E | LL031008.07 | RBL08.551 | E  |
| TC040901.06 | RBL01.161 | E | LL031008.08 | RBL08.552 | R  |
| TC040901.07 | RBL01.162 | E | LL031008.09 | RBL08.553 | R  |
| TC040901.08 | RBL01.163 | E | LL031008.10 | RBL08.554 | J  |
| TC040901.09 | RBL01.164 | E | LL031008.11 | RBL08.555 | E  |
| TC040901.10 | RBL01.165 | E | LL031008.12 | RBL08.556 | E  |
| TC040901.11 | RBL01.166 | R | LL031008.13 | RBL08.557 | E  |
| TC040901.12 | RBL01.167 | E | LL031008.14 | RBL08.558 | E  |
| TC040901.13 | RBL01.168 | E | LL031008.15 | RBL08.559 | S  |
| TC040901.14 | RBL01.169 | E | LL031008.16 | RBL08.560 | E  |
| TC040901.15 | RBL01.170 | J | LL031008.17 | RBL08.561 | E  |
| TC040901.16 | RBL01.171 | S | LL031008.18 | RBL08.562 | E  |
| TC040901.17 | RBL01.172 | S | LL031008.19 | RBL08.563 | E  |
| TC040901.18 | RBL01.173 | E | LL031008.20 | RBL08.564 | E  |
| TC040901.19 | RBL01.174 | E | LL031008.21 | RBL08.565 | CC |
| TC040901.20 | RBL01.175 | E | LL031008.22 | RBL08.566 | E  |
| TC040901.21 | RBL01.176 | E | LL031008.23 | RBL08.567 | E  |
| TC040901.22 | RBL01.177 | B | LL031008.24 | RBL08.568 | R  |
| TC040901.23 | RBL01.178 | E | LL031008.25 | RBL08.569 | B  |
| TC040901.24 | RBL01.179 | E | LL031008.26 | RBL08.570 | E  |
| TC040901.25 | RBL01.180 | R | LL031008.27 | RBL08.571 | B  |
| TC040901.26 | RBL01.181 | E | WC051208.01 | RBL08.572 | E  |
| TC040901.27 | RBL01.182 | E | WC051208.02 | RBL08.573 | E  |
| YC040901.01 | RBL01.183 | E | WC051208.03 | RBL08.574 | E  |
| YC040901.02 | RBL01.184 | E | WC051208.04 | RBL08.575 | E  |
| YC040901.03 | RBL01.185 | E | WC051208.05 | RBL08.576 | E  |
| YC040901.04 | RBL01.186 | E | WC051208.06 | RBL08.577 | R  |
| YC040901.05 | RBL01.187 | E | WC051208.07 | RBL08.578 | E  |
| YC040901.06 | RBL01.188 | E | WC051208.08 | RBL08.579 | E  |
| YC040901.07 | RBL01.189 | E | TC051408.01 | RBL08.607 | E  |
| YC040901.08 | RBL01.190 | E | TC051408.02 | RBL08.608 | E  |
| YC040901.09 | RBL01.191 | E | TC051408.03 | RBL08.609 | A  |
| YC040901.10 | RBL01.192 | E | TC051408.04 | RBL08.610 | S  |
| YC040901.11 | RBL01.193 | B | TC051408.05 | RBL08.611 | R  |
| YC040901.12 | RBL01.194 | A | TC051408.06 | RBL08.612 | E  |
| YC040901.13 | RBL01.195 | E | TC051408.07 | RBL08.613 | E  |
| YC040901.14 | RBL01.196 | E | TC051408.08 | RBL08.614 | B  |
| YC040901.15 | RBL01.197 | E | TC051408.09 | RBL08.615 | A  |
| YC040901.16 | RBL01.198 | B | TC051408.10 | RBL08.616 | B  |
| YC040901.17 | RBL01.199 | E | TC051408.11 | RBL08.617 | R  |

|             |           |   |             |           |    |
|-------------|-----------|---|-------------|-----------|----|
| YC040901.18 | RBL01.200 | E | TC051408.12 | RBL08.618 | C  |
| YC040901.19 | RBL01.201 | E | TC051408.13 | RBL08.619 | E  |
| YC040901.20 | RBL01.202 | E | TC051408.14 | RBL08.620 | S  |
| YC040901.21 | RBL01.203 | E | TC051408.15 | RBL08.621 | S  |
| YC040901.22 | RBL01.204 | E | TC051408.16 | RBL08.622 | S  |
| YC040901.23 | RBL01.205 | E | TC051408.17 | RBL08.623 | E  |
| YC040901.24 | RBL01.206 | E | TC051508.01 | RBL08.624 | A  |
| YC040901.25 | RBL01.207 | E | TC051508.02 | RBL08.625 | A  |
| HF041201.01 | RBL01.208 | A | TC051508.03 | RBL08.626 | R  |
| HF041201.02 | RBL01.209 | E | TC051508.04 | RBL08.627 | E  |
| HF041201.03 | RBL01.210 | S | TC051508.05 | RBL08.628 | E  |
| HF041201.04 | RBL01.211 | B | TC051508.06 | RBL08.629 | E  |
| HF041201.05 | RBL01.212 | B | TC051508.07 | RBL08.630 | B  |
| HF041201.06 | RBL01.213 | B | TC051508.08 | RBL08.631 | B  |
| HF041201.07 | RBL01.214 | S | HF020609.01 | RBL09.001 | S  |
| HF041201.08 | RBL01.215 | E | HF020609.02 | RBL09.002 | S  |
| HF041201.09 | RBL01.216 | E | HF020609.03 | RBL09.003 | BB |
| HF041201.10 | RBL01.217 | E | HF020609.04 | RBL09.004 | E  |
| HF041201.11 | RBL01.218 | R | HF020609.05 | RBL09.005 | E  |
| HF041201.12 | RBL01.219 | S | HF020609.06 | RBL09.006 | S  |
| HF041201.13 | RBL01.220 | S | HF020609.07 | RBL09.007 | E  |
| HF041201.14 | RBL01.221 | B | HF020609.08 | RBL09.008 | E  |
| HF041201.15 | RBL01.222 | B | HF020609.09 | RBL09.009 | E  |
| HF041201.16 | RBL01.223 | E | HF020609.10 | RBL09.010 | E  |
| HF041201.17 | RBL01.224 | E | HF020609.11 | RBL09.011 | B  |
| HF041201.18 | RBL01.225 | E | HF020609.12 | RBL09.012 | E  |
| HF041201.19 | RBL01.226 | E | HF020609.13 | RBL09.013 | B  |
| HF041201.20 | RBL01.227 | Y | HF020609.14 | RBL09.014 | E  |
| HF041201.21 | RBL01.228 | R | HF020609.15 | RBL09.015 | K  |
| HF041201.22 | RBL01.229 | E | HF020609.16 | RBL09.016 | S  |
| HF041201.23 | RBL01.230 | S | HF020609.17 | RBL09.017 | A  |
| HF041201.24 | RBL01.231 | S | HF020609.18 | RBL09.018 | E  |
| HF041201.25 | RBL01.232 | S | HF020609.19 | RBL09.019 | C  |
| HH21402.01  | RBL02.001 | A | HF020609.20 | RBL09.020 | E  |
| HH21402.02  | RBL02.002 | E | HF020609.21 | RBL09.021 | E  |
| HH21402.03  | RBL02.003 | E | HF020609.22 | RBL09.022 | B  |
| HH21402.04  | RBL02.004 | E | HF020609.23 | RBL09.023 | E  |
| HH21402.05  | RBL02.005 | E | HF020609.24 | RBL09.024 | C  |
| HH21402.06  | RBL02.006 | E | HF020609.25 | RBL09.025 | E  |
| HH21402.07  | RBL02.007 | E | TC020609.01 | RBL09.026 | B  |
| HH21402.08  | RBL02.008 | P | TC020609.02 | RBL09.027 | B  |

|            |           |   |             |           |   |
|------------|-----------|---|-------------|-----------|---|
| HH21402.09 | RBL02.009 | S | TC020609.03 | RBL09.028 | A |
| HH21402.10 | RBL02.010 | E | TC020609.04 | RBL09.029 | B |
| HH21402.11 | RBL02.011 | E | TC020609.05 | RBL09.030 | E |
| HH21402.12 | RBL02.012 | E | TC020609.06 | RBL09.031 | B |
| HH21402.13 | RBL02.013 | E | TC020609.07 | RBL09.032 | B |
| HH21402.14 | RBL02.014 | E | TC020609.08 | RBL09.033 | E |
| HH21402.15 | RBL02.015 | P | TC020609.09 | RBL09.034 | B |
| HH21402.16 | RBL02.016 | E | TC020609.10 | RBL09.035 | E |
| HH21402.17 | RBL02.017 | E | TC020609.11 | RBL09.036 | B |
| HH21402.18 | RBL02.018 | E | TC020609.12 | RBL09.037 | B |
| HH21402.19 | RBL02.019 | E | TC020609.13 | RBL09.038 | E |
| HH21402.20 | RBL02.020 | S | TC020609.14 | RBL09.039 | A |
| HH21402.21 | RBL02.021 | E | TC020609.15 | RBL09.040 | E |
| HH21402.22 | RBL02.022 | E | TC020609.16 | RBL09.041 | B |
| HH21402.23 | RBL02.023 | E | TC020609.17 | RBL09.042 | B |
| HH21402.24 | RBL02.024 | E | TC020609.18 | RBL09.043 | A |
| HH21402.25 | RBL02.025 | E | TC020609.19 | RBL09.044 | B |
| HH21402.26 | RBL02.026 | E | TC020609.20 | RBL09.045 | B |
| HH21402.27 | RBL02.027 | E | TC020609.21 | RBL09.046 | A |
| HH21402.28 | RBL02.028 | E | TC020609.22 | RBL09.047 | A |
| HH21402.29 | RBL02.029 | E | TC020609.23 | RBL09.048 | A |
| HH21402.30 | RBL02.030 | E | TC020609.24 | RBL09.049 | B |
| HH21402.31 | RBL02.031 | E | TC020609.25 | RBL09.050 | B |
| YC21402.01 | RBL02.032 | E | YC020609.01 | RBL09.051 | E |
| YC21402.02 | RBL02.033 | E | YC020609.02 | RBL09.052 | E |
| YC21402.03 | RBL02.034 | E | YC020609.03 | RBL09.053 | R |
| YC21402.04 | RBL02.035 | A | YC020609.04 | RBL09.054 | E |
| YC21402.05 | RBL02.036 | E | YC020609.05 | RBL09.055 | E |
| YC21402.06 | RBL02.037 | M | YC020609.06 | RBL09.056 | E |
| YC21402.07 | RBL02.038 | E | YC020609.07 | RBL09.057 | E |
| YC21402.08 | RBL02.039 | M | YC020609.08 | RBL09.058 | E |
| YC21402.09 | RBL02.040 | E | YC020609.09 | RBL09.059 | E |
| YC21402.10 | RBL02.041 | E | YC020609.11 | RBL09.061 | F |
| YC21402.11 | RBL02.042 | E | YC020609.12 | RBL09.062 | B |
| YC21402.12 | RBL02.043 | E | YC020609.13 | RBL09.063 | E |
| YC21402.13 | RBL02.044 | E | YC020609.14 | RBL09.064 | E |
| YC21402.16 | RBL02.047 | F | YC020609.15 | RBL09.065 | S |
| YC21402.17 | RBL02.048 | E | YC020609.16 | RBL09.066 | E |
| YC21402.18 | RBL02.049 | E | YC020609.17 | RBL09.067 | E |
| YC21402.19 | RBL02.050 | E | YC020609.18 | RBL09.068 | E |
| YC21402.20 | RBL02.051 | F | YC020609.19 | RBL09.069 | F |

|            |           |   |             |           |   |
|------------|-----------|---|-------------|-----------|---|
| YC21402.21 | RBL02.052 | E | YC020609.20 | RBL09.070 | E |
| YC21402.22 | RBL02.053 | E | YC020609.21 | RBL09.071 | E |
| YC21402.23 | RBL02.054 | E | YC020609.22 | RBL09.072 | E |
| YC21402.24 | RBL02.055 | E | LC021709.01 | RBL09.075 | S |
| YC21402.25 | RBL02.056 | E | LC021709.02 | RBL09.076 | S |
| HH22602.01 | RBL02.057 | B | LC021709.03 | RBL09.077 | E |
| HH22602.02 | RBL02.058 | E | LC021709.04 | RBL09.078 | S |
| HH22602.03 | RBL02.059 | E | LC021709.05 | RBL09.079 | B |
| HH22602.04 | RBL02.060 | E | LC021709.06 | RBL09.080 | C |
| HH22602.05 | RBL02.061 | E | LC021709.07 | RBL09.081 | E |
| HH22602.06 | RBL02.062 | F | LC021709.08 | RBL09.082 | E |
| HH22602.07 | RBL02.063 | E | LC021709.09 | RBL09.083 | E |
| HH22602.08 | RBL02.064 | S | LC021709.10 | RBL09.084 | E |
| HH22602.09 | RBL02.065 | E | LC021709.11 | RBL09.085 | B |
| HH22602.10 | RBL02.066 | E | LC021709.12 | RBL09.086 | A |
| HH22602.11 | RBL02.067 | E | LC021709.13 | RBL09.087 | E |
| HH22602.12 | RBL02.068 | E | LC021709.14 | RBL09.088 | R |
| HH22602.13 | RBL02.069 | B | LC021709.15 | RBL09.089 | C |
| HH22602.14 | RBL02.070 | S | LC021709.16 | RBL09.090 | E |
| HH22602.15 | RBL02.071 | B | LC021709.17 | RBL09.091 | A |
| HH22602.16 | RBL02.072 | E | LC021709.18 | RBL09.092 | E |
| HH22602.17 | RBL02.073 | E | LC021709.19 | RBL09.093 | S |
| HH22602.18 | RBL02.074 | S | LC021709.20 | RBL09.094 | K |
| HH22602.19 | RBL02.075 | E | LC021709.21 | RBL09.095 | A |
| HH22602.20 | RBL02.076 | E | LC021709.22 | RBL09.096 | K |
| HH22602.21 | RBL02.077 | E | LC021709.23 | RBL09.097 | A |
| HH22602.22 | RBL02.078 | B | LC021709.24 | RBL09.098 | E |
| HH22602.23 | RBL02.079 | E | LC021709.25 | RBL09.099 | K |
| TC22602.01 | RBL02.080 | E | TB021709.01 | RBL09.100 | E |
| TC22602.02 | RBL02.081 | E | TB021709.02 | RBL09.101 | Z |
| TC22602.03 | RBL02.082 | E | TB021709.03 | RBL09.102 | E |
| TC22602.04 | RBL02.083 | S | TB021709.04 | RBL09.103 | E |
| TC22602.05 | RBL02.084 | E | TB021709.05 | RBL09.104 | R |
| TC22602.07 | RBL02.086 | S | TB021709.06 | RBL09.105 | R |
| TC22602.08 | RBL02.087 | E | TB021709.07 | RBL09.106 | E |
| TC22602.09 | RBL02.088 | E | TB021709.08 | RBL09.107 | Z |
| TC22602.10 | RBL02.089 | F | TB021709.09 | RBL09.108 | B |
| TC22602.11 | RBL02.090 | P | TB021709.10 | RBL09.109 | Z |
| TC22602.12 | RBL02.091 | R | TB021709.11 | RBL09.110 | E |
| TC22602.13 | RBL02.092 | E | TB021709.12 | RBL09.111 | B |
| TC22602.14 | RBL02.093 | E | TB021709.13 | RBL09.112 | E |



|            |           |   |             |           |    |
|------------|-----------|---|-------------|-----------|----|
| TC22602.15 | RBL02.094 | B | TB021709.14 | RBL09.113 | E  |
| TC22602.16 | RBL02.095 | E | TB021709.15 | RBL09.114 | E  |
| TC22602.17 | RBL02.096 | P | TB021709.16 | RBL09.115 | Z  |
| TC22602.18 | RBL02.097 | E | TB021709.17 | RBL09.116 | E  |
| TC22602.19 | RBL02.098 | E | TB021709.18 | RBL09.117 | S  |
| TC22602.21 | RBL02.100 | B | TB021709.19 | RBL09.118 | E  |
| TC22602.22 | RBL02.101 | B | TB021709.20 | RBL09.119 | Z  |
| TC22602.23 | RBL02.102 | E | TB021709.21 | RBL09.120 | Z  |
| TC22602.24 | RBL02.103 | E | TB021709.22 | RBL09.121 | Z  |
| YC22602.01 | RBL02.104 | E | TB021709.23 | RBL09.122 | R  |
| YC22602.02 | RBL02.105 | S | TB021709.24 | RBL09.123 | Z  |
| YC22602.03 | RBL02.106 | E | TB021709.25 | RBL09.124 | BB |
| YC22602.04 | RBL02.107 | E | YC021709.01 | RBL09.125 | E  |
| YC22602.05 | RBL02.108 | B | YC021709.02 | RBL09.126 | F  |
| YC22602.08 | RBL02.111 | B | YC021709.03 | RBL09.127 | E  |
| YC22602.09 | RBL02.112 | E | YC021709.04 | RBL09.128 | H  |
| YC22602.10 | RBL02.113 | E | YC021709.05 | RBL09.129 | E  |
| YC22602.11 | RBL02.114 | E | YC021709.06 | RBL09.130 | S  |
| YC22602.12 | RBL02.115 | E | YC021709.07 | RBL09.131 | E  |
| YC22602.13 | RBL02.116 | E | YC021709.08 | RBL09.132 | S  |
| YC22602.14 | RBL02.117 | E | YC021709.09 | RBL09.133 | E  |
| YC22602.15 | RBL02.118 | B | YC021709.10 | RBL09.134 | E  |
| YC22602.16 | RBL02.119 | R | YC021709.11 | RBL09.135 | S  |
| YC22602.17 | RBL02.120 | E | YC021709.12 | RBL09.136 | E  |
| YC22602.18 | RBL02.121 | E | YC021709.13 | RBL09.137 | E  |
| YC22602.19 | RBL02.122 | E | YC021709.14 | RBL09.138 | R  |
| YC22602.20 | RBL02.123 | E | YC021709.15 | RBL09.139 | R  |
| YC22602.21 | RBL02.124 | E | YC021709.16 | RBL09.140 | E  |
| YC22602.22 | RBL02.125 | E | YC021709.17 | RBL09.141 | E  |
| YC22602.23 | RBL02.126 | E | YC021709.18 | RBL09.142 | E  |
| YC22602.24 | RBL02.127 | J | YC021709.19 | RBL09.143 | E  |
| YC22602.25 | RBL02.128 | B | YC021709.20 | RBL09.144 | E  |
| TC31102.01 | RBL02.129 | E | YC021709.21 | RBL09.145 | E  |
| TC31102.02 | RBL02.130 | C | YC021709.22 | RBL09.146 | E  |
| TC31102.03 | RBL02.131 | E | YC021709.23 | RBL09.147 | E  |
| TC31102.04 | RBL02.132 | B | YC021709.24 | RBL09.148 | E  |
| TC31102.05 | RBL02.133 | A | YC021709.25 | RBL09.149 | E  |
| TC31102.06 | RBL02.134 | E | TC030209.01 | RBL09.150 | E  |
| TC31102.08 | RBL02.136 | E | TC030209.02 | RBL09.151 | E  |
| TC31102.09 | RBL02.137 | A | TC030209.03 | RBL09.152 | E  |
| TC31102.10 | RBL02.138 | B | TC030209.04 | RBL09.153 | E  |

|            |           |   |             |           |   |
|------------|-----------|---|-------------|-----------|---|
| TC31102.11 | RBL02.139 | R | TC030209.05 | RBL09.154 | C |
| TC31102.12 | RBL02.140 | R | TC030209.06 | RBL09.155 | E |
| TC31102.13 | RBL02.141 | E | TC030209.07 | RBL09.156 | E |
| TC31102.14 | RBL02.142 | E | TC030209.08 | RBL09.157 | E |
| TC31102.15 | RBL02.143 | E | TC030209.09 | RBL09.158 | E |
| TC31102.16 | RBL02.144 | E | TC030209.10 | RBL09.159 | E |
| TC31102.17 | RBL02.145 | R | TC030209.11 | RBL09.160 | E |
| TC31102.18 | RBL02.146 | E | TC030209.12 | RBL09.161 | E |
| TC31102.19 | RBL02.147 | E | TC030209.13 | RBL09.162 | R |
| TC31102.20 | RBL02.148 | F | TC030209.14 | RBL09.163 | E |
| TC31102.21 | RBL02.149 | E | TC030209.15 | RBL09.164 | B |
| TC31102.22 | RBL02.150 | R | TC030209.16 | RBL09.165 | E |
| TC31102.23 | RBL02.151 | E | TC030209.17 | RBL09.166 | E |
| TC31102.24 | RBL02.152 | E | TC030209.18 | RBL09.167 | S |
| TC31102.25 | RBL02.153 | E | TC030209.19 | RBL09.168 | E |
| TC31102.26 | RBL02.154 | R | TC030209.20 | RBL09.169 | S |
| NM31202.01 | RBL02.155 | E | TC030209.21 | RBL09.170 | B |
| NM31202.02 | RBL02.156 | E | TC030209.22 | RBL09.171 | E |
| NM31202.03 | RBL02.157 | R | TC030209.23 | RBL09.172 | E |
| NM31202.04 | RBL02.158 | S | TC030209.24 | RBL09.173 | R |
| NM31202.05 | RBL02.159 | E | TC030209.25 | RBL09.174 | E |
| NM31202.06 | RBL02.160 | R | YC030209.01 | RBL09.175 | E |
| NM31202.07 | RBL02.161 | E | YC030209.02 | RBL09.176 | E |
| NM31202.08 | RBL02.162 | C | YC030209.03 | RBL09.177 | R |
| NM31202.09 | RBL02.163 | R | YC030209.04 | RBL09.178 | V |
| NM31202.10 | RBL02.164 | E | YC030209.05 | RBL09.179 | S |
| NM31202.11 | RBL02.165 | H | YC030209.06 | RBL09.180 | S |
| NM31202.12 | RBL02.166 | S | YC030209.07 | RBL09.181 | S |
| NM31202.13 | RBL02.167 | E | YC030209.08 | RBL09.182 | B |
| NM31202.14 | RBL02.168 | E | YC030209.09 | RBL09.183 | R |
| NM31202.15 | RBL02.169 | E | YC030209.10 | RBL09.184 | S |
| NM31202.16 | RBL02.170 | E | YC030209.11 | RBL09.185 | S |
| NM31202.17 | RBL02.171 | E | YC030209.12 | RBL09.186 | E |
| NM31202.18 | RBL02.172 | B | YC030209.13 | RBL09.187 | E |
| NM31202.19 | RBL02.173 | F | YC030209.14 | RBL09.188 | A |
| NM31202.20 | RBL02.174 | E | YC030209.15 | RBL09.189 | Q |
| NM31202.21 | RBL02.175 | B | YC030209.16 | RBL09.190 | S |
| NM31202.22 | RBL02.176 | E | YC030209.17 | RBL09.191 | E |
| NM31202.23 | RBL02.177 | B | YC030209.18 | RBL09.192 | S |
| NM31202.24 | RBL02.178 | R | YC030209.19 | RBL09.193 | R |
| YC31202.01 | RBL02.179 | E | YC030209.20 | RBL09.194 | B |

|            |           |   |             |           |   |
|------------|-----------|---|-------------|-----------|---|
| YC31202.02 | RBL02.180 | E | YC030209.23 | RBL09.197 | R |
| YC31202.03 | RBL02.181 | A | YC030209.24 | RBL09.198 | E |
| YC31202.04 | RBL02.182 | E | YC030209.25 | RBL09.199 | R |
| YC31202.05 | RBL02.183 | E | HF030309.01 | RBL09.200 | E |
| YC31202.06 | RBL02.184 | E | HF030309.02 | RBL09.201 | B |
| YC31202.07 | RBL02.185 | E | HF030309.03 | RBL09.202 | E |
| YC31202.08 | RBL02.186 | A | HF030309.04 | RBL09.203 | B |
| YC31202.09 | RBL02.187 | E | HF030309.05 | RBL09.204 | E |
| YC31202.10 | RBL02.188 | E | HF030309.06 | RBL09.205 | R |
| YC31202.11 | RBL02.189 | E | HF030309.07 | RBL09.206 | E |
| YC31202.12 | RBL02.190 | B | HF030309.08 | RBL09.207 | E |
| YC31202.13 | RBL02.191 | E | HF030309.09 | RBL09.208 | E |
| YC31202.14 | RBL02.192 | E | HF030309.10 | RBL09.209 | S |
| YC31202.15 | RBL02.193 | E | HF030309.11 | RBL09.210 | B |
| YC31202.16 | RBL02.194 | J | HF030309.12 | RBL09.211 | E |
| YC31202.18 | RBL02.196 | E | HF030309.13 | RBL09.212 | E |
| YC31202.19 | RBL02.197 | E | HF030309.14 | RBL09.213 | S |
| YC31202.20 | RBL02.198 | E | HF030309.15 | RBL09.214 | B |
| YC31202.21 | RBL02.199 | F | HF030309.16 | RBL09.215 | E |
| YC31202.22 | RBL02.200 | E | HF030309.17 | RBL09.216 | B |
| YC31202.23 | RBL02.201 | A | HF030309.18 | RBL09.217 | E |
| YC31202.24 | RBL02.202 | E | HF030309.19 | RBL09.218 | A |
| YC31202.25 | RBL02.203 | A | HF030309.20 | RBL09.219 | E |
| WC32502.01 | RBL02.204 | R | HF030309.21 | RBL09.220 | E |
| WC32502.02 | RBL02.205 | E | HF030309.22 | RBL09.221 | E |
| WC32502.03 | RBL02.206 | E | HF030309.23 | RBL09.222 | E |
| WC32502.04 | RBL02.207 | A | HF030309.24 | RBL09.223 | E |
| WC32502.05 | RBL02.208 | A | HF030309.25 | RBL09.224 | B |
| WC32502.06 | RBL02.209 | E | TC031609.01 | RBL09.225 | E |
| WC32502.07 | RBL02.210 | E | TC031609.02 | RBL09.226 | F |
| WC32502.08 | RBL02.211 | E | TC031609.03 | RBL09.227 | G |
| WC32502.09 | RBL02.212 | E | TC031609.04 | RBL09.228 | E |
| WC32502.10 | RBL02.213 | E | TC031609.05 | RBL09.229 | E |
| WC32502.11 | RBL02.214 | E | TC031609.06 | RBL09.230 | B |
| WC32502.12 | RBL02.215 | R | TC031609.07 | RBL09.231 | B |
| WC32502.13 | RBL02.216 | E | TC031609.08 | RBL09.232 | G |
| WC32502.14 | RBL02.217 | E | TC031609.09 | RBL09.233 | E |
| WC32502.15 | RBL02.218 | E | TC031609.10 | RBL09.234 | E |
| WC32502.16 | RBL02.219 | E | TC031609.11 | RBL09.235 | E |
| WC32502.17 | RBL02.220 | F | TC031609.12 | RBL09.236 | B |
| WC32502.18 | RBL02.221 | E | TC031609.13 | RBL09.237 | G |

|            |           |   |             |           |   |
|------------|-----------|---|-------------|-----------|---|
| WC32502.19 | RBL02.222 | E | TC031609.14 | RBL09.238 | E |
| WC32502.20 | RBL02.223 | B | TC031609.15 | RBL09.239 | B |
| WC32502.22 | RBL02.225 | E | TC031609.16 | RBL09.240 | E |
| WC32502.23 | RBL02.226 | E | TC031609.17 | RBL09.241 | E |
| WC32502.24 | RBL02.227 | E | TC031609.18 | RBL09.242 | E |
| WC32502.25 | RBL02.228 | E | TC031609.19 | RBL09.243 | E |
| TC32702.01 | RBL02.229 | E | TC031609.20 | RBL09.244 | E |
| TC32702.02 | RBL02.230 | A | TC031609.21 | RBL09.245 | E |
| TC32702.03 | RBL02.231 | R | TC031609.22 | RBL09.246 | B |
| TC32702.04 | RBL02.232 | E | TC031609.23 | RBL09.247 | E |
| TC32702.05 | RBL02.233 | S | TC031609.24 | RBL09.248 | E |
| TC32702.06 | RBL02.234 | E | TC031609.25 | RBL09.249 | B |
| TC32702.07 | RBL02.235 | E | WR031709.01 | RBL09.250 | E |
| TC32702.08 | RBL02.236 | E | WR031709.02 | RBL09.251 | B |
| TC32702.09 | RBL02.237 | E | WR031709.03 | RBL09.252 | R |
| TC32702.10 | RBL02.238 | C | WR031709.04 | RBL09.253 | A |
| TC32702.11 | RBL02.239 | E | WR031709.05 | RBL09.254 | E |
| TC32702.12 | RBL02.240 | E | WR031709.06 | RBL09.255 | B |
| TC32702.13 | RBL02.241 | E | WR031709.07 | RBL09.256 | E |
| TC32702.14 | RBL02.242 | S | WR031709.08 | RBL09.257 | A |
| TC32702.15 | RBL02.243 | S | WR031709.09 | RBL09.258 | E |
| TC32702.16 | RBL02.244 | S | WR031709.10 | RBL09.259 | E |
| TC32702.17 | RBL02.245 | E | WR031709.11 | RBL09.260 | E |
| TC32702.18 | RBL02.246 | S | WR031709.12 | RBL09.261 | B |
| TC32702.19 | RBL02.247 | E | WR031709.13 | RBL09.262 | E |
| TC32702.20 | RBL02.248 | E | WR031709.14 | RBL09.263 | R |
| TC32702.21 | RBL02.249 | S | WR031709.15 | RBL09.264 | A |
| TC32702.22 | RBL02.250 | E | WR031709.16 | RBL09.265 | E |
| TC32702.23 | RBL02.251 | C | WR031709.17 | RBL09.266 | B |
| TC32702.24 | RBL02.252 | E | WR031709.18 | RBL09.267 | J |
| TC32702.25 | RBL02.253 | E | WR031709.19 | RBL09.268 | A |
| YC32902.01 | RBL02.254 | S | WR031709.20 | RBL09.269 | E |
| YC32902.02 | RBL02.255 | E | WR031709.21 | RBL09.270 | E |
| YC32902.03 | RBL02.256 | E | WR031709.22 | RBL09.271 | H |
| YC32902.04 | RBL02.257 | E | WR031709.23 | RBL09.272 | E |
| YC32902.05 | RBL02.258 | B | WR031709.24 | RBL09.273 | E |
| YC32902.06 | RBL02.259 | E | WR031709.25 | RBL09.274 | E |
| YC32902.07 | RBL02.260 | E | VC031809.01 | RBL09.275 | E |
| YC32902.08 | RBL02.261 | E | VC031809.02 | RBL09.276 | E |
| YC32902.09 | RBL02.262 | E | VC031809.03 | RBL09.277 | E |
| YC32902.10 | RBL02.263 | E | VC031809.04 | RBL09.278 | E |

|            |           |   |             |           |   |
|------------|-----------|---|-------------|-----------|---|
| YC32902.11 | RBL02.264 | E | VC031809.05 | RBL09.279 | B |
| YC32902.12 | RBL02.265 | E | VC031809.06 | RBL09.280 | R |
| YC32902.13 | RBL02.266 | P | VC031809.07 | RBL09.281 | E |
| YC32902.14 | RBL02.267 | E | VC031809.08 | RBL09.282 | E |
| YC32902.15 | RBL02.268 | S | VC031809.09 | RBL09.283 | E |
| YC32902.16 | RBL02.269 | E | VC031809.10 | RBL09.284 | E |
| YC32902.17 | RBL02.270 | F | VC031809.11 | RBL09.285 | E |
| YC32902.18 | RBL02.271 | A | VC031809.12 | RBL09.286 | E |
| YC32902.19 | RBL02.272 | E | VC031809.13 | RBL09.287 | B |
| YC32902.20 | RBL02.273 | S | VC031809.14 | RBL09.288 | B |
| YC32902.21 | RBL02.274 | K | VC031809.15 | RBL09.289 | P |
| YC32902.22 | RBL02.275 | R | VC031809.16 | RBL09.290 | E |
| YC32902.23 | RBL02.276 | E | VC031809.17 | RBL09.291 | E |
| YC32902.24 | RBL02.277 | A | VC031809.18 | RBL09.292 | S |
| YC32902.25 | RBL02.278 | E | VC031809.19 | RBL09.293 | E |
| WC40502.01 | RBL02.279 | E | VC031809.20 | RBL09.294 | E |
| WC40502.02 | RBL02.280 | E | VC031809.21 | RBL09.295 | E |
| WC40502.03 | RBL02.281 | E | VC031809.22 | RBL09.296 | R |
| WC40502.04 | RBL02.282 | E | VC031809.23 | RBL09.297 | E |
| WC40502.05 | RBL02.283 | S | VC031809.24 | RBL09.298 | P |
| WC40502.06 | RBL02.284 | E | VC031809.25 | RBL09.299 | E |
| WC40502.07 | RBL02.285 | E | YC031809.01 | RBL09.300 | E |
| WC40502.08 | RBL02.286 | E | YC031809.02 | RBL09.301 | E |
| WC40502.09 | RBL02.287 | R | YC031809.03 | RBL09.302 | F |
| WC40502.10 | RBL02.288 | E | YC031809.04 | RBL09.303 | E |
| WC40502.11 | RBL02.289 | E | YC031809.05 | RBL09.304 | E |
| WC40502.12 | RBL02.290 | E | YC031809.06 | RBL09.305 | J |
| WC40502.13 | RBL02.291 | E | YC031809.07 | RBL09.306 | L |
| WC40502.14 | RBL02.292 | E | YC031809.08 | RBL09.307 | E |
| WC40502.15 | RBL02.293 | E | YC031809.09 | RBL09.308 | E |
| WC40502.16 | RBL02.294 | E | YC031809.10 | RBL09.309 | E |
| WC40502.17 | RBL02.295 | E | YC031809.11 | RBL09.310 | P |
| WC40502.18 | RBL02.296 | E | YC031809.12 | RBL09.311 | E |
| WC40502.19 | RBL02.297 | R | YC031809.13 | RBL09.312 | E |
| WC40502.20 | RBL02.298 | E | YC031809.14 | RBL09.313 | E |
| WC40502.21 | RBL02.299 | E | YC031809.15 | RBL09.314 | S |
| WC40502.22 | RBL02.300 | E | YC031809.16 | RBL09.315 | E |
| WC40502.23 | RBL02.301 | E | YC031809.17 | RBL09.316 | E |
| WC40502.24 | RBL02.302 | E | YC031809.18 | RBL09.317 | B |
| WC40502.25 | RBL02.303 | E | YC031809.19 | RBL09.318 | E |
| HF40902.01 | RBL02.304 | S | YC031809.20 | RBL09.319 | P |

|            |           |   |             |           |    |
|------------|-----------|---|-------------|-----------|----|
| HF40902.02 | RBL02.305 | E | YC031809.21 | RBL09.320 | E  |
| HF40902.03 | RBL02.306 | E | YC031809.22 | RBL09.321 | E  |
| HF40902.04 | RBL02.307 | A | YC031809.23 | RBL09.322 | L  |
| HF40902.05 | RBL02.308 | E | YC031809.24 | RBL09.323 | P  |
| HF40902.06 | RBL02.309 | E | YC031809.25 | RBL09.324 | E  |
| HF40902.07 | RBL02.310 | E | CC032009.01 | RBL09.325 | E  |
| HF40902.08 | RBL02.311 | E | CC032009.02 | RBL09.326 | B  |
| HF40902.09 | RBL02.312 | E | CC032009.03 | RBL09.327 | R  |
| HF40902.10 | RBL02.313 | E | CC032009.04 | RBL09.328 | E  |
| HF40902.11 | RBL02.314 | V | CC032009.05 | RBL09.329 | E  |
| HF40902.12 | RBL02.315 | E | CC032009.06 | RBL09.330 | E  |
| HF40902.13 | RBL02.316 | G | CC032009.07 | RBL09.331 | B  |
| HF40902.14 | RBL02.317 | S | CC032009.08 | RBL09.332 | E  |
| HF40902.15 | RBL02.318 | E | CC032009.09 | RBL09.333 | E  |
| HF40902.16 | RBL02.319 | S | CC032009.10 | RBL09.334 | E  |
| HF40902.17 | RBL02.320 | E | CC032009.11 | RBL09.335 | J  |
| HF40902.18 | RBL02.321 | E | CC032009.12 | RBL09.336 | E  |
| HF40902.19 | RBL02.322 | E | CC032009.13 | RBL09.337 | F  |
| HF40902.20 | RBL02.323 | E | CC032009.14 | RBL09.338 | E  |
| HF40902.21 | RBL02.324 | E | CC032009.15 | RBL09.339 | E  |
| HF40902.22 | RBL02.325 | E | CC032009.16 | RBL09.340 | E  |
| HF40902.23 | RBL02.326 | E | CC032009.17 | RBL09.341 | CC |
| HF40902.24 | RBL02.327 | E | CC032009.18 | RBL09.342 | P  |
| HF40902.25 | RBL02.328 | E | CC032009.19 | RBL09.343 | J  |
| YC41002.01 | RBL02.329 | E | CC032009.20 | RBL09.344 | G  |
| YC41002.02 | RBL02.330 | R | CC032009.21 | RBL09.345 | A  |
| YC41002.03 | RBL02.331 | E | CC032009.22 | RBL09.346 | E  |
| YC41002.04 | RBL02.332 | E | CC032009.23 | RBL09.347 | B  |
| YC41002.05 | RBL02.333 | E | VC033109.01 | RBL09.348 | E  |
| YC41002.06 | RBL02.334 | E | VC033109.02 | RBL09.349 | B  |
| YC41002.07 | RBL02.335 | E | VC033109.03 | RBL09.350 | E  |
| YC41002.08 | RBL02.336 | E | VC033109.04 | RBL09.351 | E  |
| YC41002.09 | RBL02.337 | E | VC033109.05 | RBL09.352 | A  |
| YC41002.10 | RBL02.338 | E | VC033109.06 | RBL09.353 | E  |
| YC41002.11 | RBL02.339 | E | VC033109.07 | RBL09.354 | E  |
| YC41002.12 | RBL02.340 | E | VC033109.08 | RBL09.355 | E  |
| YC41002.13 | RBL02.341 | R | VC033109.09 | RBL09.356 | E  |
| YC41002.14 | RBL02.342 | E | VC033109.10 | RBL09.357 | E  |
| YC41002.15 | RBL02.343 | R | VC033109.11 | RBL09.358 | E  |
| YC41002.16 | RBL02.344 | C | VC033109.12 | RBL09.359 | B  |
| YC41002.17 | RBL02.345 | E | VC033109.13 | RBL09.360 | E  |

|            |           |   |             |           |   |
|------------|-----------|---|-------------|-----------|---|
| YC41002.18 | RBL02.346 | R | VC033109.14 | RBL09.361 | E |
| YC41002.19 | RBL02.347 | P | VC033109.15 | RBL09.362 | E |
| YC41002.20 | RBL02.348 | E | VC033109.16 | RBL09.363 | E |
| YC41002.21 | RBL02.349 | C | VC033109.17 | RBL09.364 | E |
| YC41002.22 | RBL02.350 | E | VC033109.18 | RBL09.365 | B |
| YC41002.23 | RBL02.351 | E | VC033109.19 | RBL09.366 | E |
| YC41002.24 | RBL02.352 | R | VC033109.20 | RBL09.367 | R |
| YC41002.25 | RBL02.353 | E | VC033109.21 | RBL09.368 | E |
| NM21203.01 | RBL03.001 | E | VC033109.22 | RBL09.369 | E |
| NM21203.02 | RBL03.002 | E | VC033109.23 | RBL09.370 | E |
| NM21203.03 | RBL03.003 | R | VC033109.24 | RBL09.371 | E |
| NM21203.04 | RBL03.004 | E | TC033109.01 | RBL09.372 | E |
| NM21203.05 | RBL03.005 | E | TC033109.02 | RBL09.373 | E |
| NM21203.06 | RBL03.006 | E | TC033109.03 | RBL09.374 | E |
| NM21203.07 | RBL03.007 | E | TC033109.04 | RBL09.375 | R |
| NM21203.08 | RBL03.008 | E | TC033109.05 | RBL09.376 | E |
| NM21203.09 | RBL03.009 | E | TC033109.06 | RBL09.377 | R |
| NM21203.10 | RBL03.010 | R | TC033109.07 | RBL09.378 | E |
| NM21203.11 | RBL03.011 | E | TC033109.08 | RBL09.379 | E |
| NM21203.12 | RBL03.012 | E | TC033109.09 | RBL09.380 | E |
| NM21203.13 | RBL03.013 | R | TC033109.10 | RBL09.381 | E |
| NM21203.14 | RBL03.014 | R | TC033109.11 | RBL09.382 | E |
| NM21203.15 | RBL03.015 | E | TC033109.12 | RBL09.383 | R |
| NM21203.16 | RBL03.016 | E | TC033109.13 | RBL09.384 | R |
| NM21203.17 | RBL03.017 | K | TC033109.14 | RBL09.385 | E |
| NM21203.18 | RBL03.018 | E | TC033109.15 | RBL09.386 | E |
| NM21203.19 | RBL03.019 | E | TC033109.16 | RBL09.387 | E |
| NM21203.20 | RBL03.020 | B | TC033109.17 | RBL09.388 | R |
| NM21203.21 | RBL03.021 | E | TC033109.18 | RBL09.389 | E |
| NM21203.22 | RBL03.022 | E | TC033109.19 | RBL09.390 | E |
| NM21203.23 | RBL03.023 | R | TC033109.20 | RBL09.391 | E |
| NM21203.24 | RBL03.024 | E | TC033109.21 | RBL09.392 | E |
| NM21203.25 | RBL03.025 | K | TC033109.22 | RBL09.393 | E |
| NM22603.01 | RBL03.026 | K | TC033109.23 | RBL09.394 | R |
| NM22603.02 | RBL03.027 | E | TC033109.24 | RBL09.395 | E |
| NM22603.03 | RBL03.028 | E | TC033109.25 | RBL09.396 | E |
| NM22603.04 | RBL03.029 | B | LC033109.01 | RBL09.397 | R |
| NM22603.05 | RBL03.030 | B | LC033109.02 | RBL09.398 | E |
| NM22603.06 | RBL03.031 | B | LC033109.03 | RBL09.399 | B |
| NM22603.07 | RBL03.032 | E | LC033109.04 | RBL09.400 | E |
| NM22603.08 | RBL03.033 | B | LC033109.05 | RBL09.401 | E |

|            |           |   |             |           |   |
|------------|-----------|---|-------------|-----------|---|
| NM22603.09 | RBL03.034 | I | LC033109.06 | RBL09.402 | C |
| NM22603.10 | RBL03.035 | R | LC033109.07 | RBL09.403 | E |
| NM22603.11 | RBL03.036 | E | LC033109.08 | RBL09.404 | S |
| NM22603.12 | RBL03.037 | E | LC033109.09 | RBL09.405 | E |
| NM22603.13 | RBL03.038 | G | LC033109.10 | RBL09.406 | B |
| NM22603.14 | RBL03.039 | E | LC033109.11 | RBL09.407 | E |
| NM22603.15 | RBL03.040 | F | LC033109.12 | RBL09.408 | E |
| NM22603.16 | RBL03.041 | B | LC033109.13 | RBL09.409 | E |
| NM22603.17 | RBL03.042 | F | LC033109.14 | RBL09.410 | B |
| NM22603.18 | RBL03.043 | S | LC033109.15 | RBL09.411 | M |
| NM22603.19 | RBL03.044 | E | LC033109.16 | RBL09.412 | B |
| NM22603.20 | RBL03.045 | E | LC033109.17 | RBL09.413 | E |
| NM22603.21 | RBL03.046 | G | LC033109.18 | RBL09.414 | S |
| NM22603.22 | RBL03.047 | A | LC033109.19 | RBL09.415 | B |
| NM22603.23 | RBL03.048 | B | LC033109.20 | RBL09.416 | Q |
| NM22603.24 | RBL03.049 | E | LC033109.21 | RBL09.417 | E |
| NM22603.25 | RBL03.050 | S | LC033109.22 | RBL09.418 | E |
| NM31203.01 | RBL03.051 | E | LC033109.23 | RBL09.419 | S |
| NM31203.02 | RBL03.052 | S | LC033109.24 | RBL09.420 | S |
| NM31203.03 | RBL03.053 | E | YC033109.01 | RBL09.421 | R |
| NM31203.04 | RBL03.054 | B | YC033109.02 | RBL09.422 | G |
| NM31203.05 | RBL03.055 | A | YC033109.03 | RBL09.423 | R |
| NM31203.06 | RBL03.056 | E | YC033109.04 | RBL09.424 | E |
| NM31203.07 | RBL03.057 | S | YC033109.05 | RBL09.425 | E |
| NM31203.08 | RBL03.058 | E | YC033109.06 | RBL09.426 | R |
| NM31203.09 | RBL03.059 | E | YC033109.07 | RBL09.427 | S |
| NM31203.10 | RBL03.060 | E | YC033109.08 | RBL09.428 | E |
| NM31203.11 | RBL03.061 | B | YC033109.09 | RBL09.429 | R |
| NM31203.12 | RBL03.062 | E | YC033109.10 | RBL09.430 | R |
| NM31203.13 | RBL03.063 | E | YC033109.11 | RBL09.431 | B |
| NM31203.14 | RBL03.064 | R | YC033109.12 | RBL09.432 | R |
| NM31203.15 | RBL03.065 | A | YC033109.13 | RBL09.433 | C |
| NM31203.16 | RBL03.066 | E | YC033109.14 | RBL09.434 | E |
| NM31203.17 | RBL03.067 | R | YC033109.15 | RBL09.435 | R |
| NM31203.18 | RBL03.068 | B | YC033109.16 | RBL09.436 | E |
| NM31203.19 | RBL03.069 | E | YC033109.17 | RBL09.437 | E |
| NM31203.20 | RBL03.070 | U | YC033109.18 | RBL09.438 | E |
| NM31203.21 | RBL03.071 | E | YC033109.19 | RBL09.439 | G |
| NM31203.22 | RBL03.072 | E | YC033109.20 | RBL09.440 | E |
| NM31203.23 | RBL03.073 | E | YC033109.21 | RBL09.441 | R |
| NM31203.24 | RBL03.074 | E | YC033109.22 | RBL09.442 | G |



|            |           |   |             |           |   |
|------------|-----------|---|-------------|-----------|---|
| NM31203.25 | RBL03.075 | E | YC033109.23 | RBL09.443 | G |
| NM32603.01 | RBL03.076 | E | YC033109.24 | RBL09.444 | B |
| NM32603.02 | RBL03.077 | C | YC033109.25 | RBL09.445 | E |
| NM32603.03 | RBL03.078 | E | LS041309.01 | RBL09.446 | S |
| NM32603.04 | RBL03.079 | E | LS041309.02 | RBL09.447 | E |
| NM32603.05 | RBL03.080 | E | LS041309.03 | RBL09.448 | B |
| NM32603.06 | RBL03.081 | Q | LS041309.04 | RBL09.449 | E |
| NM32603.07 | RBL03.082 | E | LS041309.05 | RBL09.450 | E |
| NM32603.08 | RBL03.083 | G | LS041309.06 | RBL09.451 | E |
| NM32603.09 | RBL03.084 | S | LS041309.07 | RBL09.452 | R |
| NM32603.10 | RBL03.085 | E | LS041309.08 | RBL09.453 | E |
| NM32603.11 | RBL03.086 | C | LS041309.09 | RBL09.454 | F |
| NM32603.12 | RBL03.087 | E | LS041309.10 | RBL09.455 | E |
| NM32603.13 | RBL03.088 | E | LS041309.11 | RBL09.456 | E |
| NM32603.14 | RBL03.089 | A | LS041309.12 | RBL09.457 | E |
| NM32603.15 | RBL03.090 | K | LS041309.13 | RBL09.458 | E |
| NM32603.16 | RBL03.091 | E | LS041309.14 | RBL09.459 | C |
| NM32603.17 | RBL03.092 | S | LS041309.15 | RBL09.460 | R |
| NM32603.18 | RBL03.093 | E | LS041309.16 | RBL09.461 | E |
| NM32603.19 | RBL03.094 | E | LS041309.17 | RBL09.462 | E |
| NM32603.20 | RBL03.095 | E | LS041309.18 | RBL09.463 | F |
| NM32603.21 | RBL03.096 | E | LS041309.19 | RBL09.464 | G |
| NM32603.22 | RBL03.097 | E | LS041309.20 | RBL09.465 | E |
| NM32603.23 | RBL03.098 | E | LS041309.21 | RBL09.466 | E |
| NM32603.24 | RBL03.099 | S | LS041309.22 | RBL09.467 | E |
| NM32603.25 | RBL03.100 | E | LS041309.23 | RBL09.468 | S |
| WC32903.01 | RBL03.101 | B | LS041309.24 | RBL09.469 | F |
| WC32903.02 | RBL03.102 | E | LS041309.25 | RBL09.470 | E |
| WC32903.03 | RBL03.103 | E | TC041309.01 | RBL09.471 | R |
| WC32903.04 | RBL03.104 | E | TC041309.02 | RBL09.472 | E |
| WC32903.05 | RBL03.105 | E | TC041309.03 | RBL09.473 | R |
| WC32903.06 | RBL03.106 | E | TC041309.04 | RBL09.474 | I |
| WC32903.07 | RBL03.107 | E | TC041309.05 | RBL09.475 | A |
| WC32903.08 | RBL03.108 | E | TC041309.06 | RBL09.476 | R |
| WC32903.09 | RBL03.109 | E | TC041309.07 | RBL09.477 | A |
| WC32903.10 | RBL03.110 | E | TC041309.08 | RBL09.478 | I |
| WC32903.11 | RBL03.111 | E | TC041309.09 | RBL09.479 | R |
| WC32903.12 | RBL03.112 | E | TC041309.10 | RBL09.480 | I |
| WC32903.13 | RBL03.113 | E | TC041309.11 | RBL09.481 | I |
| WC32903.14 | RBL03.114 | E | TC041309.12 | RBL09.482 | R |
| WC32903.15 | RBL03.115 | E | TC041309.13 | RBL09.483 | R |

|            |           |   |             |           |   |
|------------|-----------|---|-------------|-----------|---|
| WC32903.16 | RBL03.116 | E | TC041309.14 | RBL09.484 | E |
| WC32903.17 | RBL03.117 | E | TC041309.15 | RBL09.485 | E |
| WC32903.18 | RBL03.118 | E | TC041309.16 | RBL09.486 | E |
| WC32903.19 | RBL03.119 | E | TC041309.17 | RBL09.487 | R |
| WC32903.20 | RBL03.120 | E | TC041309.18 | RBL09.488 | I |
| WC32903.21 | RBL03.121 | E | TC041309.19 | RBL09.489 | A |
| WC32903.22 | RBL03.122 | E | TC041309.20 | RBL09.490 | R |
| WC32903.23 | RBL03.123 | E | TC041309.21 | RBL09.491 | R |
| WC32903.24 | RBL03.124 | E | TC041309.22 | RBL09.492 | R |
| WC32903.25 | RBL03.125 | E | TC041309.23 | RBL09.493 | E |
| TC21103.01 | RBL03.126 | E | TC041309.24 | RBL09.494 | E |
| TC21103.02 | RBL03.127 | E | TC041309.25 | RBL09.495 | I |
| TC21103.03 | RBL03.128 | E | YC041709.01 | RBL09.496 | E |
| TC21103.04 | RBL03.129 | E | YC041709.02 | RBL09.497 | A |
| TC21103.05 | RBL03.130 | A | YC041709.03 | RBL09.498 | E |
| TC21103.06 | RBL03.131 | A | YC041709.04 | RBL09.499 | A |
| TC21103.07 | RBL03.132 | E | YC041709.05 | RBL09.500 | A |
| TC21103.08 | RBL03.133 | E | YC041709.06 | RBL09.501 | E |
| TC21103.09 | RBL03.134 | A | YC041709.07 | RBL09.502 | A |
| TC21103.10 | RBL03.135 | A | YC041709.08 | RBL09.503 | E |
| TC21103.11 | RBL03.136 | E | YC041709.09 | RBL09.504 | E |
| TC21103.12 | RBL03.137 | E | YC041709.10 | RBL09.505 | S |
| TC21103.13 | RBL03.138 | E | YC041709.11 | RBL09.506 | E |
| TC21103.14 | RBL03.139 | E | YC041709.12 | RBL09.507 | A |
| TC21103.15 | RBL03.140 | E | YC041709.13 | RBL09.508 | G |
| TC21103.16 | RBL03.141 | A | YC041709.14 | RBL09.509 | G |
| TC21103.17 | RBL03.142 | E | YC041709.15 | RBL09.510 | A |
| TC21103.18 | RBL03.143 | E | YC041709.16 | RBL09.511 | S |
| TC21103.19 | RBL03.144 | A | YC041709.17 | RBL09.512 | G |
| TC21103.20 | RBL03.145 | E | YC041709.18 | RBL09.513 | A |
| TC21103.21 | RBL03.146 | E | YC041709.19 | RBL09.514 | S |
| TC21103.22 | RBL03.147 | S | YC041709.20 | RBL09.515 | G |
| TC21103.23 | RBL03.148 | S | YC041709.21 | RBL09.516 | G |
| TC21103.24 | RBL03.149 | E | YC041709.22 | RBL09.517 | E |
| TC21103.25 | RBL03.150 | S | YC041709.23 | RBL09.518 | A |
| TC22603.01 | RBL03.151 | E | YC041709.24 | RBL09.519 | G |
| TC22603.02 | RBL03.152 | A | YC041709.25 | RBL09.520 | E |
| TC22603.03 | RBL03.153 | B | TC020110.01 | RBL10.001 | A |
| TC22603.04 | RBL03.154 | E | TC020110.02 | RBL10.002 | E |
| TC22603.05 | RBL03.155 | E | TC020110.03 | RBL10.003 | B |
| TC22603.06 | RBL03.156 | E | TC020110.04 | RBL10.004 | B |

|            |           |   |             |           |   |
|------------|-----------|---|-------------|-----------|---|
| TC22603.07 | RBL03.157 | E | TC020110.05 | RBL10.005 | E |
| TC22603.08 | RBL03.158 | S | TC020110.06 | RBL10.006 | B |
| TC22603.09 | RBL03.159 | B | TC020110.07 | RBL10.007 | B |
| TC22603.10 | RBL03.160 | F | TC020110.08 | RBL10.008 | B |
| TC22603.11 | RBL03.161 | J | TC020110.09 | RBL10.009 | E |
| TC22603.12 | RBL03.162 | S | TC020110.10 | RBL10.010 | E |
| TC22603.14 | RBL03.164 | E | TC020110.11 | RBL10.011 | B |
| TC22603.15 | RBL03.165 | A | TC020110.12 | RBL10.012 | E |
| TC22603.16 | RBL03.166 | S | TC020110.13 | RBL10.013 | E |
| TC22603.17 | RBL03.167 | S | TC020110.14 | RBL10.014 | E |
| TC22603.18 | RBL03.168 | S | TC020110.15 | RBL10.015 | B |
| TC22603.19 | RBL03.169 | E | TC020110.16 | RBL10.016 | B |
| TC22603.20 | RBL03.170 | S | TC020110.17 | RBL10.017 | B |
| TC22603.21 | RBL03.171 | A | TC020110.18 | RBL10.018 | B |
| TC22603.22 | RBL03.172 | E | TC020110.19 | RBL10.019 | E |
| TC22603.23 | RBL03.173 | A | TC020110.20 | RBL10.020 | B |
| TC22603.24 | RBL03.174 | E | TC020110.21 | RBL10.021 | E |
| TC22603.25 | RBL03.175 | S | TC020110.22 | RBL10.022 | B |
| TC32403.01 | RBL03.176 | E | TC020110.23 | RBL10.023 | B |
| TC32403.02 | RBL03.177 | M | TC020110.24 | RBL10.024 | B |
| TC32403.03 | RBL03.178 | R | TC020110.25 | RBL10.025 | E |
| TC32403.04 | RBL03.179 | A | TC020110.01 | RBL10.026 | E |
| TC32403.05 | RBL03.180 | C | TC020110.02 | RBL10.027 | E |
| TC32403.06 | RBL03.181 | E | TC020110.03 | RBL10.028 | R |
| TC32403.07 | RBL03.182 | E | TC020110.04 | RBL10.029 | E |
| TC32403.08 | RBL03.183 | E | TC020110.05 | RBL10.030 | E |
| TC32403.09 | RBL03.184 | S | TC020110.06 | RBL10.031 | E |
| TC32403.10 | RBL03.185 | E | TC020110.07 | RBL10.032 | R |
| TC32403.11 | RBL03.186 | E | TC020110.08 | RBL10.033 | A |
| TC32403.12 | RBL03.187 | R | TC020110.09 | RBL10.034 | E |
| TC32403.13 | RBL03.188 | S | TC020110.10 | RBL10.035 | E |
| TC32403.14 | RBL03.189 | E | TC020110.11 | RBL10.036 | E |
| TC32403.15 | RBL03.190 | E | TC020110.12 | RBL10.037 | E |
| TC32403.16 | RBL03.191 | E | TC020110.13 | RBL10.038 | E |
| TC32403.17 | RBL03.192 | E | TC020110.14 | RBL10.039 | E |
| TC32403.18 | RBL03.193 | E | TC020110.15 | RBL10.040 | E |
| TC32403.19 | RBL03.194 | E | TC020110.16 | RBL10.041 | E |
| TC32403.20 | RBL03.195 | E | TC020110.17 | RBL10.042 | E |
| TC32403.21 | RBL03.196 | E | TC020110.18 | RBL10.043 | E |
| TC32403.22 | RBL03.197 | E | TC020110.19 | RBL10.044 | B |
| TC32403.23 | RBL03.198 | G | TC020110.20 | RBL10.045 | E |

|            |           |   |             |           |   |
|------------|-----------|---|-------------|-----------|---|
| TC32403.24 | RBL03.199 | E | TC020110.21 | RBL10.046 | R |
| TC32403.25 | RBL03.200 | E | TC020110.22 | RBL10.047 | S |
| TC32603.01 | RBL03.201 | S | TC020110.23 | RBL10.048 | E |
| TC32603.02 | RBL03.202 | E | TC020110.24 | RBL10.049 | E |
| TC32603.03 | RBL03.203 | E | TC020110.25 | RBL10.050 | E |
| TC32603.04 | RBL03.204 | B | HH020310.01 | RBL10.051 | E |
| TC32603.05 | RBL03.205 | E | HH020310.02 | RBL10.052 | C |
| TC32603.06 | RBL03.206 | B | HH020310.03 | RBL10.053 | F |
| TC32603.07 | RBL03.207 | B | HH020310.04 | RBL10.054 | E |
| TC32603.08 | RBL03.208 | Q | HH020310.05 | RBL10.055 | B |
| TC32603.09 | RBL03.209 | S | HH020310.06 | RBL10.056 | E |
| TC32603.10 | RBL03.210 | B | HH020310.07 | RBL10.057 | E |
| TC32603.11 | RBL03.211 | B | HH020310.08 | RBL10.058 | A |
| TC32603.12 | RBL03.212 | E | HH020310.09 | RBL10.059 | H |
| TC32603.13 | RBL03.213 | E | HH020310.10 | RBL10.060 | F |
| TC32603.14 | RBL03.214 | X | HH020310.11 | RBL10.061 | E |
| TC32603.15 | RBL03.215 | Q | HH020310.12 | RBL10.062 | E |
| TC32603.16 | RBL03.216 | E | HH020310.13 | RBL10.063 | E |
| TC32603.17 | RBL03.217 | E | HH020310.14 | RBL10.064 | H |
| TC32603.18 | RBL03.218 | E | HH020310.15 | RBL10.065 | C |
| TC32603.19 | RBL03.219 | E | HH020310.16 | RBL10.066 | E |
| TC32603.20 | RBL03.220 | B | HH020310.17 | RBL10.067 | C |
| TC32603.21 | RBL03.221 | B | HH020310.18 | RBL10.068 | H |
| TC32603.22 | RBL03.222 | B | HH020310.19 | RBL10.069 | I |
| TC32603.23 | RBL03.223 | A | HH020310.20 | RBL10.070 | E |
| TC32603.24 | RBL03.224 | E | HH020310.21 | RBL10.071 | C |
| TC32603.25 | RBL03.225 | E | HH020310.22 | RBL10.072 | E |
| TC32603.26 | RBL03.226 | W | HH020310.23 | RBL10.073 | B |
| TC32603.27 | RBL03.227 | B | HH020310.24 | RBL10.074 | E |
| TC32603.28 | RBL03.228 | E | HH020310.25 | RBL10.075 | E |
| TC32603.29 | RBL03.229 | X | HW021610.01 | RBL10.076 | C |
| TC32603.30 | RBL03.230 | E | HW021610.02 | RBL10.077 | A |
| TC32603.31 | RBL03.231 | A | HW021610.03 | RBL10.078 | E |
| TC32603.32 | RBL03.232 | B | HW021610.04 | RBL10.079 | B |
| TC32603.33 | RBL03.233 | E | HW021610.05 | RBL10.080 | F |
| TC32603.34 | RBL03.234 | B | HW021610.06 | RBL10.081 | C |
| TC32603.35 | RBL03.235 | E | HW021610.07 | RBL10.082 | S |
| YC21103.01 | RBL03.236 | A | HW021610.08 | RBL10.083 | F |
| YC21103.02 | RBL03.237 | E | HW021610.09 | RBL10.084 | E |
| YC21103.03 | RBL03.238 | E | HW021610.10 | RBL10.085 | S |
| YC21103.04 | RBL03.239 | E | HW021610.11 | RBL10.086 | S |

|            |           |   |             |           |   |
|------------|-----------|---|-------------|-----------|---|
| YC21103.05 | RBL03.240 | E | HW021610.12 | RBL10.087 | C |
| YC21103.06 | RBL03.241 | E | HW021610.13 | RBL10.088 | E |
| YC21103.07 | RBL03.242 | E | HW021610.14 | RBL10.089 | G |
| YC21103.08 | RBL03.243 | E | HW021610.15 | RBL10.090 | E |
| YC21103.09 | RBL03.244 | V | HW021610.16 | RBL10.091 | E |
| YC21103.10 | RBL03.245 | A | HW021610.17 | RBL10.092 | E |
| YC21103.11 | RBL03.246 | E | HW021610.18 | RBL10.093 | E |
| YC21103.12 | RBL03.247 | E | HW021610.19 | RBL10.094 | S |
| YC21103.13 | RBL03.248 | E | HW021610.20 | RBL10.095 | E |
| YC21103.14 | RBL03.249 | E | HW021610.21 | RBL10.096 | E |
| YC21103.15 | RBL03.250 | A | HW021610.22 | RBL10.097 | S |
| YC21103.16 | RBL03.251 | E | HW021610.23 | RBL10.098 | E |
| YC21103.17 | RBL03.252 | E | HW021610.24 | RBL10.099 | E |
| YC21103.18 | RBL03.253 | E | HW021610.25 | RBL10.100 | S |
| YC21103.19 | RBL03.254 | E | TC021610.01 | RBL10.101 | E |
| YC21103.20 | RBL03.255 | R | TC021610.02 | RBL10.102 | E |
| YC21103.21 | RBL03.256 | V | TC021610.03 | RBL10.103 | E |
| YC21103.22 | RBL03.257 | E | TC021610.04 | RBL10.104 | E |
| YC21103.23 | RBL03.258 | E | TC021610.05 | RBL10.105 | E |
| YC21103.24 | RBL03.259 | E | TC021610.06 | RBL10.106 | E |
| YC21103.25 | RBL03.260 | R | TC021610.07 | RBL10.107 | E |
| YC22803.01 | RBL03.261 | E | TC021610.08 | RBL10.108 | E |
| YC22803.02 | RBL03.262 | S | TC021610.09 | RBL10.109 | E |
| YC22803.03 | RBL03.263 | E | TC021610.10 | RBL10.110 | E |
| YC22803.04 | RBL03.264 | E | TC021610.11 | RBL10.111 | E |
| YC22803.05 | RBL03.265 | E | TC021610.12 | RBL10.112 | E |
| YC22803.06 | RBL03.266 | E | TC021610.13 | RBL10.113 | E |
| YC22803.07 | RBL03.267 | B | TC021610.14 | RBL10.114 | E |
| YC22803.08 | RBL03.268 | R | TC021610.15 | RBL10.115 | E |
| YC22803.09 | RBL03.269 | R | TC021610.16 | RBL10.116 | E |
| YC22803.10 | RBL03.270 | E | TC021610.17 | RBL10.117 | E |
| YC22803.11 | RBL03.271 | E | TC021610.18 | RBL10.118 | E |
| YC22803.12 | RBL03.272 | E | TC021610.19 | RBL10.119 | E |
| YC22803.13 | RBL03.273 | E | TC021610.20 | RBL10.120 | E |
| YC22803.14 | RBL03.274 | E | TC021610.21 | RBL10.121 | E |
| YC22803.15 | RBL03.275 | E | TC021610.22 | RBL10.122 | E |
| YC22803.16 | RBL03.276 | E | TC021610.23 | RBL10.123 | E |
| YC22803.17 | RBL03.277 | E | TC021610.24 | RBL10.124 | E |
| YC22803.18 | RBL03.278 | E | TC021610.25 | RBL10.125 | E |
| YC22803.19 | RBL03.279 | S | YC021810.01 | RBL10.126 | E |
| YC22803.20 | RBL03.280 | E | YC021810.02 | RBL10.127 | E |

|            |           |   |             |           |   |
|------------|-----------|---|-------------|-----------|---|
| YC22803.21 | RBL03.281 | E | YC021810.03 | RBL10.128 | R |
| YC22803.22 | RBL03.282 | E | YC021810.04 | RBL10.129 | E |
| YC22803.23 | RBL03.283 | R | YC021810.05 | RBL10.130 | E |
| YC22803.24 | RBL03.284 | E | YC021810.06 | RBL10.131 | C |
| YC22803.25 | RBL03.285 | B | YC021810.07 | RBL10.132 | E |
| YC31203.01 | RBL03.286 | R | YC021810.08 | RBL10.133 | B |
| YC31203.02 | RBL03.287 | B | YC021810.09 | RBL10.134 | E |
| YC31203.03 | RBL03.288 | E | YC021810.10 | RBL10.135 | J |
| YC31203.04 | RBL03.289 | Q | YC021810.11 | RBL10.136 | C |
| YC31203.05 | RBL03.290 | E | YC021810.12 | RBL10.137 | E |
| YC31203.06 | RBL03.291 | E | YC021810.13 | RBL10.138 | E |
| YC31203.07 | RBL03.292 | E | YC021810.14 | RBL10.139 | E |
| YC31203.08 | RBL03.293 | S | YC021810.15 | RBL10.140 | B |
| YC31203.09 | RBL03.294 | S | YC021810.16 | RBL10.141 | E |
| YC31203.10 | RBL03.295 | E | YC021810.17 | RBL10.142 | S |
| YC31203.11 | RBL03.296 | R | YC021810.18 | RBL10.143 | E |
| YC31203.12 | RBL03.297 | C | YC021810.19 | RBL10.144 | E |
| YC31203.13 | RBL03.298 | E | YC021810.20 | RBL10.145 | E |
| YC31203.14 | RBL03.299 | E | YC021810.21 | RBL10.146 | E |
| YC31203.15 | RBL03.300 | A | YC021810.22 | RBL10.147 | E |
| YC31203.16 | RBL03.301 | R | YC021810.23 | RBL10.148 | E |
| YC31203.18 | RBL03.303 | E | YC021810.24 | RBL10.149 | E |
| YC31203.19 | RBL03.304 | R | YC021810.25 | RBL10.150 | S |
| YC31203.20 | RBL03.305 | S | YC030110.01 | RBL10.151 | E |
| YC31203.21 | RBL03.306 | R | YC030110.02 | RBL10.152 | H |
| YC31203.22 | RBL03.307 | E | YC030110.03 | RBL10.153 | E |
| YC31203.23 | RBL03.308 | B | YC030110.04 | RBL10.154 | E |
| YC31203.24 | RBL03.309 | E | YC030110.05 | RBL10.155 | E |
| YC31203.25 | RBL03.310 | R | YC030110.06 | RBL10.156 | A |
| YC31203.26 | RBL03.311 | Q | YC030110.07 | RBL10.157 | E |
| YC31203.27 | RBL03.312 | E | YC030110.08 | RBL10.158 | E |
| YC31203.28 | RBL03.313 | E | YC030110.09 | RBL10.159 | E |
| YC31203.29 | RBL03.314 | D | YC030110.10 | RBL10.160 | M |
| YC32503.01 | RBL03.315 | E | YC030110.11 | RBL10.161 | E |
| YC32503.02 | RBL03.316 | E | YC030110.12 | RBL10.162 | E |
| YC32503.03 | RBL03.317 | E | YC030110.13 | RBL10.163 | E |
| YC32503.04 | RBL03.318 | B | YC030110.14 | RBL10.164 | R |
| YC32503.05 | RBL03.319 | R | YC030110.15 | RBL10.165 | E |
| YC32503.06 | RBL03.320 | R | YC030110.16 | RBL10.166 | E |
| YC32503.07 | RBL03.321 | R | YC030110.17 | RBL10.167 | E |
| YC32503.08 | RBL03.322 | R | YC030110.18 | RBL10.168 | H |

|            |           |   |             |           |    |
|------------|-----------|---|-------------|-----------|----|
| YC32503.09 | RBL03.323 | B | YC030110.19 | RBL10.169 | E  |
| YC32503.10 | RBL03.324 | S | YC030110.20 | RBL10.170 | R  |
| YC32503.11 | RBL03.325 | E | YC030110.21 | RBL10.171 | HH |
| YC32503.12 | RBL03.326 | E | YC030110.22 | RBL10.172 | B  |
| YC32503.13 | RBL03.327 | B | YC030110.23 | RBL10.173 | E  |
| YC32503.14 | RBL03.328 | E | YC030110.24 | RBL10.174 | R  |
| YC32503.15 | RBL03.329 | R | YC030110.25 | RBL10.175 | S  |
| YC32503.16 | RBL03.330 | B | TC030210.01 | RBL10.176 | E  |
| YC32503.17 | RBL03.331 | R | TC030210.02 | RBL10.177 | Q  |
| YC32503.18 | RBL03.332 | E | TC030210.03 | RBL10.178 | A  |
| YC32503.19 | RBL03.333 | E | TC030210.04 | RBL10.179 | E  |
| YC32503.20 | RBL03.334 | S | TC030210.05 | RBL10.180 | E  |
| YC32503.21 | RBL03.335 | R | TC030210.06 | RBL10.181 | E  |
| YC32503.22 | RBL03.336 | M | TC030210.07 | RBL10.182 | E  |
| YC32503.23 | RBL03.337 | E | TC030210.08 | RBL10.183 | E  |
| YC32503.24 | RBL03.338 | E | TC030210.09 | RBL10.184 | E  |
| YC32503.25 | RBL03.339 | E | TC030210.10 | RBL10.185 | E  |
| YC32503.26 | RBL03.340 | E | TC030210.11 | RBL10.186 | E  |
| YC32503.27 | RBL03.341 | E | TC030210.12 | RBL10.187 | F  |
| YC32503.28 | RBL03.342 | B | TC030210.13 | RBL10.188 | E  |
| YC32503.29 | RBL03.343 | S | TC030210.14 | RBL10.189 | BB |
| YC32503.30 | RBL03.344 | E | TC030210.15 | RBL10.190 | E  |
| YC32503.31 | RBL03.345 | B | TC030210.16 | RBL10.191 | S  |
| YC32503.32 | RBL03.346 | C | TC030210.17 | RBL10.192 | E  |
| YC32503.33 | RBL03.347 | E | TC030210.18 | RBL10.193 | E  |
| YC32503.35 | RBL03.349 | B | TC030210.19 | RBL10.194 | E  |
| TC31301.01 | RBL03.350 | E | TC030210.20 | RBL10.195 | E  |
| TC31301.02 | RBL03.351 | E | TC030210.21 | RBL10.196 | E  |
| TC31301.03 | RBL03.352 | E | TC030210.22 | RBL10.197 | E  |
| TC31301.04 | RBL03.353 | E | TC030210.23 | RBL10.198 | E  |
| TC31301.05 | RBL03.354 | E | TC030210.24 | RBL10.199 | S  |
| TC31301.06 | RBL03.355 | S | TC030210.25 | RBL10.200 | E  |
| TC31301.07 | RBL03.356 | C | HH030310.01 | RBL10.201 | E  |
| TC31301.08 | RBL03.357 | R | HH030310.02 | RBL10.202 | E  |
| TC31301.10 | RBL03.359 | S | HH030310.03 | RBL10.203 | B  |
| TC31301.11 | RBL03.360 | E | HH030310.04 | RBL10.204 | R  |
| TC31301.12 | RBL03.361 | S | HH030310.05 | RBL10.205 | R  |
| TC31301.13 | RBL03.362 | R | HH030310.06 | RBL10.206 | A  |
| TC31301.14 | RBL03.363 | E | HH030310.07 | RBL10.207 | E  |
| TC31301.15 | RBL03.364 | S | HH030310.08 | RBL10.208 | E  |
| TC31301.16 | RBL03.365 | E | HH030310.09 | RBL10.209 | E  |

|             |           |    |             |           |   |
|-------------|-----------|----|-------------|-----------|---|
| TC31301.17  | RBL03.366 | E  | HH030310.10 | RBL10.210 | B |
| TC31301.18  | RBL03.367 | S  | HH030310.11 | RBL10.211 | E |
| TC31301.19  | RBL03.368 | S  | HH030310.12 | RBL10.212 | E |
| TC31301.20  | RBL03.369 | E  | HH030310.13 | RBL10.213 | A |
| TC31301.21  | RBL03.370 | C  | HH030310.14 | RBL10.214 | A |
| TC31301.22  | RBL03.371 | E  | HH030310.15 | RBL10.215 | E |
| TC31301.23  | RBL03.372 | E  | HH030310.16 | RBL10.216 | E |
| TC31301.24  | RBL03.373 | E  | HH030310.17 | RBL10.217 | E |
| TC31301.25  | RBL03.374 | C  | HH030310.18 | RBL10.218 | E |
| HH020604.02 | RBL04.002 | F  | HH030310.19 | RBL10.219 | H |
| HH020604.03 | RBL04.003 | B  | HH030310.20 | RBL10.220 | E |
| HH020604.04 | RBL04.004 | E  | HH030310.21 | RBL10.221 | E |
| HH020604.05 | RBL04.005 | E  | HH030310.22 | RBL10.222 | E |
| HH020604.06 | RBL04.006 | C  | HH030310.23 | RBL10.223 | E |
| HH020604.07 | RBL04.007 | DD | HH030310.24 | RBL10.224 | E |
| HH020604.08 | RBL04.008 | H  | HH030310.25 | RBL10.225 | R |
| HH020604.09 | RBL04.009 | Q  | LC031010.01 | RBL10.226 | E |
| HH020604.01 | RBL04.01  | E  | LC031010.02 | RBL10.227 | V |
| HH020604.10 | RBL04.010 | E  | LC031010.03 | RBL10.228 | E |
| HH020604.11 | RBL04.011 | E  | LC031010.04 | RBL10.229 | E |
| HH020604.12 | RBL04.012 | E  | LC031010.05 | RBL10.230 | E |
| HH020604.13 | RBL04.013 | E  | LC031010.06 | RBL10.231 | E |
| HH020604.14 | RBL04.014 | E  | LC031010.07 | RBL10.232 | E |
| HH020604.15 | RBL04.015 | K  | LC031010.08 | RBL10.233 | E |
| HH031504.01 | RBL04.016 | E  | LC031010.09 | RBL10.234 | E |
| HH031504.02 | RBL04.017 | E  | LC031010.10 | RBL10.235 | B |
| HH031504.03 | RBL04.018 | B  | LC031010.11 | RBL10.236 | E |
| HH031504.04 | RBL04.019 | E  | LC031010.12 | RBL10.237 | P |
| HH031504.05 | RBL04.020 | E  | LC031010.13 | RBL10.238 | E |
| HH031504.06 | RBL04.021 | R  | LC031010.14 | RBL10.239 | E |
| HH031504.07 | RBL04.022 | E  | LC031010.15 | RBL10.240 | E |
| HH031504.08 | RBL04.023 | E  | LC031010.16 | RBL10.241 | E |
| HH031504.09 | RBL04.024 | E  | LC031010.17 | RBL10.242 | E |
| HH031504.10 | RBL04.025 | E  | LC031010.18 | RBL10.243 | E |
| HH031504.11 | RBL04.026 | E  | LC031010.19 | RBL10.244 | E |
| HH031504.12 | RBL04.027 | E  | LC031010.20 | RBL10.245 | E |
| HH031504.13 | RBL04.028 | A  | LC031010.21 | RBL10.246 | E |
| HH031504.14 | RBL04.029 | E  | LC031010.22 | RBL10.247 | E |
| HH031504.15 | RBL04.030 | Z  | LC031010.23 | RBL10.248 | V |
| HH031504.16 | RBL04.031 | E  | LC031010.24 | RBL10.249 | E |
| HH031504.17 | RBL04.032 | E  | LC031010.25 | RBL10.250 | P |



|             |           |   |             |           |   |
|-------------|-----------|---|-------------|-----------|---|
| HH031504.18 | RBL04.033 | S | VC031610.01 | RBL10.251 | E |
| HH031504.19 | RBL04.034 | S | VC031610.02 | RBL10.252 | B |
| HH031504.20 | RBL04.035 | E | VC031610.03 | RBL10.253 | E |
| HH031504.21 | RBL04.036 | F | VC031610.04 | RBL10.254 | E |
| HH031504.22 | RBL04.037 | E | VC031610.05 | RBL10.255 | C |
| HH031504.23 | RBL04.038 | E | VC031610.06 | RBL10.256 | E |
| HH032904.01 | RBL04.039 | E | VC031610.07 | RBL10.257 | E |
| HH032904.02 | RBL04.040 | S | VC031610.08 | RBL10.258 | R |
| HH032904.03 | RBL04.041 | V | VC031610.09 | RBL10.259 | R |
| HH032904.04 | RBL04.042 | V | VC031610.10 | RBL10.260 | B |
| HH032904.05 | RBL04.043 | V | VC031610.11 | RBL10.261 | B |
| HH032904.06 | RBL04.044 | V | VC031610.12 | RBL10.262 | E |
| HH032904.07 | RBL04.045 | E | VC031610.13 | RBL10.263 | B |
| HH032904.08 | RBL04.046 | E | VC031610.14 | RBL10.264 | E |
| HH032904.09 | RBL04.047 | B | VC031610.15 | RBL10.265 | E |
| HH032904.10 | RBL04.048 | E | VC031610.16 | RBL10.266 | E |
| HH032904.11 | RBL04.049 | E | VC031610.17 | RBL10.267 | E |
| HH032904.12 | RBL04.050 | B | VC031610.18 | RBL10.268 | E |
| HH032904.13 | RBL04.051 | V | VC031610.19 | RBL10.269 | E |
| HH032904.14 | RBL04.052 | E | VC031610.20 | RBL10.270 | E |
| HH032904.15 | RBL04.053 | V | VC031610.21 | RBL10.271 | E |
| HH032904.16 | RBL04.054 | E | VC031610.22 | RBL10.272 | E |
| HH032904.17 | RBL04.055 | H | VC031610.23 | RBL10.273 | E |
| HH032904.18 | RBL04.056 | B | VC031610.24 | RBL10.274 | B |
| HH032904.19 | RBL04.057 | E | VC031610.25 | RBL10.275 | R |
| HH032904.20 | RBL04.058 | V | TC031610.01 | RBL10.276 | E |
| HH032904.21 | RBL04.059 | F | TC031610.02 | RBL10.277 | E |
| HH032904.22 | RBL04.060 | V | TC031610.03 | RBL10.278 | E |
| HH032904.23 | RBL04.061 | E | TC031610.04 | RBL10.279 | E |
| HH032904.24 | RBL04.062 | V | TC031610.05 | RBL10.280 | E |
| HH032904.25 | RBL04.063 | E | TC031610.06 | RBL10.281 | E |
| NM020304.01 | RBL04.064 | E | TC031610.07 | RBL10.282 | B |
| NM020304.02 | RBL04.065 | E | TC031610.08 | RBL10.283 | E |
| NM020304.03 | RBL04.066 | E | TC031610.09 | RBL10.284 | E |
| NM020304.04 | RBL04.067 | E | TC031610.10 | RBL10.285 | E |
| NM020304.05 | RBL04.068 | B | TC031610.11 | RBL10.286 | R |
| NM020304.06 | RBL04.069 | E | TC031610.12 | RBL10.287 | E |
| NM020304.07 | RBL04.070 | E | TC031610.13 | RBL10.288 | E |
| NM020304.08 | RBL04.071 | E | TC031610.15 | RBL10.290 | E |
| NM020304.09 | RBL04.072 | E | TC031610.16 | RBL10.291 | E |
| NM020304.10 | RBL04.073 | E | TC031610.17 | RBL10.292 | E |

|             |           |    |             |           |   |
|-------------|-----------|----|-------------|-----------|---|
| NM021704.01 | RBL04.074 | E  | TC031610.18 | RBL10.293 | S |
| NM021704.02 | RBL04.075 | E  | TC031610.19 | RBL10.294 | R |
| NM021704.03 | RBL04.076 | E  | TC031610.20 | RBL10.295 | S |
| NM021704.04 | RBL04.077 | E  | TC031610.21 | RBL10.296 | E |
| NM022004.01 | RBL04.078 | E  | TC031610.22 | RBL10.297 | R |
| NM022004.02 | RBL04.079 | E  | TC031610.24 | RBL10.299 | E |
| NM022004.03 | RBL04.080 | S  | TC031610.25 | RBL10.300 | R |
| NM022004.04 | RBL04.081 | E  | YC031610.01 | RBL10.301 | R |
| NM022004.05 | RBL04.082 | E  | YC031610.02 | RBL10.302 | E |
| NM022004.06 | RBL04.083 | V  | YC031610.03 | RBL10.303 | E |
| NM022004.07 | RBL04.084 | E  | YC031610.04 | RBL10.304 | E |
| NM022004.08 | RBL04.085 | A  | YC031610.05 | RBL10.305 | R |
| NM022004.09 | RBL04.086 | A  | YC031610.06 | RBL10.306 | E |
| NM022004.10 | RBL04.087 | E  | YC031610.07 | RBL10.307 | E |
| NM022004.11 | RBL04.088 | E  | YC031610.08 | RBL10.308 | E |
| NM022004.12 | RBL04.089 | A  | YC031610.09 | RBL10.309 | E |
| NM022004.13 | RBL04.090 | E  | YC031610.10 | RBL10.310 | E |
| NM022004.14 | RBL04.091 | E  | YC031610.11 | RBL10.311 | E |
| NM022004.15 | RBL04.092 | R  | YC031610.12 | RBL10.312 | E |
| NM022004.16 | RBL04.093 | E  | YC031610.13 | RBL10.313 | E |
| NM022004.17 | RBL04.094 | CC | YC031610.14 | RBL10.314 | A |
| NM022004.18 | RBL04.095 | E  | YC031610.15 | RBL10.315 | E |
| NM022004.19 | RBL04.096 | E  | YC031610.16 | RBL10.316 | E |
| NM022004.20 | RBL04.097 | P  | YC031610.17 | RBL10.317 | E |
| NM022004.21 | RBL04.098 | R  | YC031610.18 | RBL10.318 | F |
| NM022004.22 | RBL04.099 | S  | YC031610.19 | RBL10.319 | R |
| NM022004.23 | RBL04.100 | E  | YC031610.20 | RBL10.320 | B |
| NM022004.24 | RBL04.101 | S  | YC031610.21 | RBL10.321 | E |
| NM022004.25 | RBL04.102 | E  | YC031610.22 | RBL10.322 | J |
| NM030104.01 | RBL04.103 | E  | YC031610.23 | RBL10.323 | E |
| NM030104.02 | RBL04.104 | A  | YC031610.24 | RBL10.324 | E |
| NM030104.03 | RBL04.105 | G  | YC031610.25 | RBL10.325 | G |
| NM030104.04 | RBL04.106 | G  | JC032910.01 | RBL10.326 | E |
| NM030104.05 | RBL04.107 | E  | JC032910.02 | RBL10.327 | E |
| NM030104.06 | RBL04.108 | A  | JC032910.03 | RBL10.328 | S |
| NM030104.07 | RBL04.109 | E  | JC032910.04 | RBL10.329 | C |
| NM030104.08 | RBL04.110 | E  | JC032910.05 | RBL10.330 | E |
| NM030104.09 | RBL04.111 | E  | JC032910.06 | RBL10.331 | R |
| NM030104.10 | RBL04.112 | E  | JC032910.07 | RBL10.332 | E |
| NM030104.11 | RBL04.113 | E  | JC032910.08 | RBL10.333 | E |
| NM030104.12 | RBL04.114 | E  | JC032910.09 | RBL10.334 | E |

|             |           |   |             |           |    |
|-------------|-----------|---|-------------|-----------|----|
| NM030104.13 | RBL04.115 | E | JC032910.10 | RBL10.335 | E  |
| NM030104.14 | RBL04.116 | E | JC032910.11 | RBL10.336 | E  |
| NM030104.15 | RBL04.117 | E | JC032910.12 | RBL10.337 | E  |
| NM030104.16 | RBL04.118 | S | JC032910.13 | RBL10.338 | C  |
| NM030104.17 | RBL04.119 | F | JC032910.14 | RBL10.339 | E  |
| NM030104.18 | RBL04.120 | E | JC032910.15 | RBL10.340 | BB |
| NM030104.19 | RBL04.121 | E | JC032910.16 | RBL10.341 | E  |
| NM030104.20 | RBL04.122 | E | JC032910.17 | RBL10.342 | E  |
| NM030104.21 | RBL04.123 | E | JC032910.18 | RBL10.343 | C  |
| NM030104.22 | RBL04.124 | E | JC032910.19 | RBL10.344 | E  |
| NM030104.23 | RBL04.125 | E | JC032910.20 | RBL10.345 | S  |
| NM030104.24 | RBL04.126 | E | JC032910.21 | RBL10.346 | E  |
| NM030104.25 | RBL04.127 | A | JC032910.22 | RBL10.347 | E  |
| NM041304.01 | RBL04.128 | F | JC032910.23 | RBL10.348 | E  |
| NM041304.02 | RBL04.129 | E | JC032910.24 | RBL10.349 | R  |
| NM041304.03 | RBL04.130 | E | JC032910.25 | RBL10.350 | H  |
| NM041304.04 | RBL04.131 | C | YC032910.01 | RBL10.351 | B  |
| NM041304.05 | RBL04.132 | S | YC032910.02 | RBL10.352 | E  |
| NM041304.06 | RBL04.133 | E | YC032910.03 | RBL10.353 | E  |
| NM041304.07 | RBL04.134 | E | YC032910.04 | RBL10.354 | Q  |
| NM041304.08 | RBL04.135 | V | YC032910.05 | RBL10.355 | E  |
| NM041304.09 | RBL04.136 | F | YC032910.06 | RBL10.356 | Q  |
| NM041304.10 | RBL04.137 | E | YC032910.07 | RBL10.357 | E  |
| NM041304.11 | RBL04.138 | S | YC032910.08 | RBL10.358 | C  |
| NM041304.12 | RBL04.139 | E | YC032910.09 | RBL10.359 | E  |
| NM041304.13 | RBL04.140 | E | YC032910.10 | RBL10.360 | E  |
| NM041304.14 | RBL04.141 | S | YC032910.11 | RBL10.361 | E  |
| NM041304.15 | RBL04.142 | A | YC032910.12 | RBL10.362 | E  |
| NM041304.16 | RBL04.143 | R | YC032910.13 | RBL10.363 | E  |
| NM041304.17 | RBL04.144 | E | YC032910.14 | RBL10.364 | R  |
| NM041304.18 | RBL04.145 | E | YC032910.15 | RBL10.365 | Q  |
| NM041304.19 | RBL04.146 | E | YC032910.16 | RBL10.366 | C  |
| NM041304.20 | RBL04.147 | G | YC032910.17 | RBL10.367 | G  |
| NM041304.21 | RBL04.148 | E | YC032910.18 | RBL10.368 | E  |
| TC020304.01 | RBL04.149 | E | YC032910.19 | RBL10.369 | HH |
| TC020304.02 | RBL04.150 | A | YC032910.20 | RBL10.370 | C  |
| TC020304.03 | RBL04.151 | E | YC032910.21 | RBL10.371 | C  |
| TC020304.04 | RBL04.152 | E | YC032910.22 | RBL10.372 | E  |
| TC020304.05 | RBL04.153 | E | YC032910.23 | RBL10.373 | E  |
| TC020304.06 | RBL04.154 | E | YC032910.24 | RBL10.374 | E  |
| TC020304.07 | RBL04.155 | E | YC032910.25 | RBL10.375 | R  |

|             |           |   |             |           |    |
|-------------|-----------|---|-------------|-----------|----|
| TC020304.08 | RBL04.156 | E | YC032910.26 | RBL10.376 | E  |
| TC020304.09 | RBL04.157 | E | YC032910.27 | RBL10.377 | E  |
| TC020304.10 | RBL04.158 | E | TC033010.01 | RBL10.378 | BB |
| TC020304.11 | RBL04.159 | E | TC033010.02 | RBL10.379 | R  |
| TC020304.12 | RBL04.160 | A | TC033010.03 | RBL10.380 | B  |
| TC020304.13 | RBL04.161 | A | TC033010.04 | RBL10.381 | E  |
| TC020304.14 | RBL04.162 | E | TC033010.05 | RBL10.382 | R  |
| TC020304.15 | RBL04.163 | E | TC033010.06 | RBL10.383 | E  |
| TC020304.16 | RBL04.164 | I | TC033010.07 | RBL10.384 | R  |
| TC020304.17 | RBL04.165 | E | TC033010.08 | RBL10.385 | E  |
| TC020304.18 | RBL04.166 | E | TC033010.09 | RBL10.386 | R  |
| TC020304.19 | RBL04.167 | E | TC033010.10 | RBL10.387 | E  |
| TC020304.20 | RBL04.168 | E | TC033010.11 | RBL10.388 | E  |
| TC020304.21 | RBL04.169 | E | TC033010.12 | RBL10.389 | A  |
| TC020304.22 | RBL04.170 | E | TC033010.13 | RBL10.390 | E  |
| TC020304.23 | RBL04.171 | E | TC033010.14 | RBL10.391 | S  |
| TC020304.24 | RBL04.172 | E | TC033010.15 | RBL10.392 | E  |
| TC020304.25 | RBL04.173 | E | TC033010.16 | RBL10.393 | H  |
| TC020304.26 | RBL04.174 | E | TC033010.17 | RBL10.394 | R  |
| TC020304.27 | RBL04.175 | E | TC033010.18 | RBL10.395 | R  |
| TC021804.01 | RBL04.176 | S | TC033010.19 | RBL10.396 | E  |
| TC021804.02 | RBL04.177 | A | TC033010.20 | RBL10.397 | R  |
| TC021804.03 | RBL04.178 | A | TC033010.21 | RBL10.398 | A  |
| TC021804.04 | RBL04.179 | E | TC033010.22 | RBL10.399 | E  |
| TC021804.05 | RBL04.180 | E | TC033010.23 | RBL10.400 | E  |
| TC021804.06 | RBL04.181 | E | TC033010.24 | RBL10.401 | E  |
| TC021804.07 | RBL04.182 | E | TC033010.25 | RBL10.402 | E  |
| TC021804.08 | RBL04.183 | E | HF033010.01 | RBL10.403 | G  |
| TC021804.09 | RBL04.184 | S | HF033010.02 | RBL10.404 | R  |
| TC021804.10 | RBL04.185 | S | HF033010.03 | RBL10.405 | E  |
| TC021804.11 | RBL04.186 | E | HF033010.04 | RBL10.406 | E  |
| TC021804.12 | RBL04.187 | E | HF033010.05 | RBL10.407 | B  |
| TC021804.13 | RBL04.188 | S | HF033010.06 | RBL10.408 | E  |
| TC021804.14 | RBL04.189 | E | HF033010.08 | RBL10.410 | A  |
| TC021804.15 | RBL04.190 | S | HF033010.09 | RBL10.411 | A  |
| TC021804.16 | RBL04.191 | S | HF033010.10 | RBL10.412 | E  |
| TC021804.17 | RBL04.192 | A | HF033010.11 | RBL10.413 | E  |
| TC021804.18 | RBL04.193 | A | HF033010.12 | RBL10.414 | H  |
| TC021804.19 | RBL04.194 | E | HF033010.13 | RBL10.415 | E  |
| TC021804.20 | RBL04.195 | A | HF033010.14 | RBL10.416 | E  |
| TC021804.21 | RBL04.196 | B | HF033010.15 | RBL10.417 | E  |

|             |           |   |             |           |    |
|-------------|-----------|---|-------------|-----------|----|
| TC021804.22 | RBL04.197 | E | HF033010.16 | RBL10.418 | S  |
| TC021804.23 | RBL04.198 | S | HF033010.17 | RBL10.419 | S  |
| TC021804.24 | RBL04.199 | E | HF033010.18 | RBL10.420 | R  |
| TC021804.25 | RBL04.200 | E | HF033010.19 | RBL10.421 | E  |
| TC030204.01 | RBL04.201 | E | HF033010.20 | RBL10.422 | E  |
| TC030204.02 | RBL04.202 | E | HF033010.21 | RBL10.423 | E  |
| TC030204.03 | RBL04.203 | B | HF033010.22 | RBL10.424 | E  |
| TC030204.04 | RBL04.204 | E | HF033010.23 | RBL10.425 | E  |
| TC030204.05 | RBL04.205 | R | HF033010.24 | RBL10.426 | E  |
| TC030204.06 | RBL04.206 | E | HF033010.25 | RBL10.427 | E  |
| TC030204.07 | RBL04.207 | E | TC041310.01 | RBL10.428 | F  |
| TC030204.08 | RBL04.208 | E | TC041310.02 | RBL10.429 | E  |
| TC030204.09 | RBL04.209 | E | TC041310.03 | RBL10.430 | E  |
| TC030204.10 | RBL04.210 | E | TC041310.04 | RBL10.431 | E  |
| TC030204.11 | RBL04.211 | B | TC041310.05 | RBL10.432 | S  |
| TC030204.12 | RBL04.212 | E | TC041310.06 | RBL10.433 | E  |
| TC030204.13 | RBL04.213 | B | TC041310.07 | RBL10.434 | GG |
| TC030204.14 | RBL04.214 | B | TC041310.08 | RBL10.435 | S  |
| TC030204.15 | RBL04.215 | E | TC041310.09 | RBL10.436 | B  |
| TC030204.16 | RBL04.216 | E | TC041310.10 | RBL10.437 | E  |
| TC030204.17 | RBL04.217 | E | TC041310.11 | RBL10.438 | E  |
| TC030204.18 | RBL04.218 | E | TC041310.12 | RBL10.439 | E  |
| TC030204.19 | RBL04.219 | E | TC041310.13 | RBL10.440 | Q  |
| TC030204.20 | RBL04.220 | E | TC041310.14 | RBL10.441 | E  |
| TC030204.21 | RBL04.221 | E | TC041310.15 | RBL10.442 | C  |
| TC030204.22 | RBL04.222 | R | TC041310.16 | RBL10.443 | E  |
| TC030204.23 | RBL04.223 | E | TC041310.17 | RBL10.444 | E  |
| TC030204.24 | RBL04.224 | E | TC041310.18 | RBL10.445 | BB |
| TC030204.25 | RBL04.225 | B | TC041310.19 | RBL10.446 | E  |
| TC031704.01 | RBL04.226 | E | TC041310.20 | RBL10.447 | E  |
| TC031704.02 | RBL04.227 | E | TC041310.21 | RBL10.448 | E  |
| TC031704.03 | RBL04.228 | E | TC041310.22 | RBL10.449 | BB |
| TC031704.04 | RBL04.229 | E | TC041310.23 | RBL10.450 | CC |
| TC031704.05 | RBL04.230 | E | TC041310.24 | RBL10.451 | E  |
| TC031704.06 | RBL04.231 | E | TC041310.25 | RBL10.452 | GG |
| TC031704.07 | RBL04.232 | E | JC041510.01 | RBL10.453 | A  |
| TC031704.08 | RBL04.233 | E | JC041510.02 | RBL10.454 | E  |
| TC031704.09 | RBL04.234 | E | JC041510.03 | RBL10.455 | E  |
| TC031704.11 | RBL04.236 | E | JC041510.04 | RBL10.456 | E  |
| TC031704.12 | RBL04.237 | E | JC041510.05 | RBL10.457 | E  |
| TC031704.13 | RBL04.238 | E | JC041510.06 | RBL10.458 | S  |

|             |           |    |              |           |   |
|-------------|-----------|----|--------------|-----------|---|
| TC031704.14 | RBL04.239 | E  | JC041510.07  | RBL10.459 | S |
| TC031704.15 | RBL04.240 | E  | JC041510.08  | RBL10.460 | E |
| TC031704.16 | RBL04.241 | S  | JC041510.09  | RBL10.461 | S |
| TC031704.17 | RBL04.242 | E  | JC041510.10  | RBL10.462 | E |
| TC031704.18 | RBL04.243 | E  | JC041510.11  | RBL10.463 | E |
| TC031704.19 | RBL04.244 | E  | JC041510.12  | RBL10.464 | J |
| TC031704.20 | RBL04.245 | E  | JC041510.13  | RBL10.465 | J |
| TC031704.21 | RBL04.246 | E  | JC041510.14  | RBL10.466 | E |
| TC031704.22 | RBL04.247 | E  | JC041510.15  | RBL10.467 | E |
| TC031704.23 | RBL04.248 | E  | JC041510.16  | RBL10.468 | B |
| TC031704.24 | RBL04.249 | E  | JC041510.17  | RBL10.469 | J |
| TC031704.25 | RBL04.250 | E  | JC041510.18  | RBL10.470 | B |
| TC031704.26 | RBL04.251 | E  | JC041510.19  | RBL10.471 | E |
| TC031704.27 | RBL04.252 | E  | JC041510.20  | RBL10.472 | S |
| TC031704.28 | RBL04.253 | R  | JC041510.21  | RBL10.473 | S |
| TC031704.29 | RBL04.254 | E  | JC041510.22  | RBL10.474 | E |
| TC031704.30 | RBL04.255 | E  | JC041510.23  | RBL10.475 | E |
| TC033004.01 | RBL04.256 | R  | JC041510.24  | RBL10.476 | E |
| TC033004.02 | RBL04.257 | E  | JC041510.25  | RBL10.477 | E |
| TC033004.03 | RBL04.258 | E  | JC041510.26  | RBL10.478 | F |
| TC033004.04 | RBL04.259 | C  | JC041510.27  | RBL10.479 | E |
| TC033004.05 | RBL04.260 | E  | JC041510.28  | RBL10.480 | S |
| TC033004.06 | RBL04.261 | E  | JC041510.29  | RBL10.481 | E |
| TC033004.07 | RBL04.262 | R  | HH.013111.01 | RBL11.001 | H |
| TC033004.08 | RBL04.263 | C  | HH.013111.02 | RBL11.002 | E |
| TC033004.09 | RBL04.264 | R  | HH.013111.03 | RBL11.003 | E |
| TC033004.10 | RBL04.265 | R  | HH.013111.04 | RBL11.004 | S |
| TC033004.11 | RBL04.266 | E  | HH.013111.05 | RBL11.005 | E |
| TC033004.12 | RBL04.267 | E  | HH.013111.06 | RBL11.006 | E |
| TC033004.13 | RBL04.268 | R  | HH.013111.07 | RBL11.007 | E |
| TC033004.14 | RBL04.269 | R  | HH.013111.08 | RBL11.008 | I |
| TC033004.15 | RBL04.270 | S  | HH.013111.09 | RBL11.009 | E |
| TC033004.16 | RBL04.271 | C  | HH.013111.10 | RBL11.010 | E |
| TC033004.17 | RBL04.272 | CC | HH.013111.11 | RBL11.011 | S |
| TC033004.18 | RBL04.273 | R  | HH.013111.12 | RBL11.012 | E |
| TC033004.19 | RBL04.274 | R  | HH.013111.13 | RBL11.013 | E |
| TC033004.20 | RBL04.275 | E  | HH.013111.14 | RBL11.014 | B |
| TC033004.21 | RBL04.276 | P  | HH.013111.15 | RBL11.015 | B |
| TC033004.22 | RBL04.277 | E  | HH.013111.16 | RBL11.016 | R |
| TC033004.23 | RBL04.278 | R  | HH.013111.17 | RBL11.017 | S |
| TC033004.24 | RBL04.279 | S  | HH.013111.18 | RBL11.018 | E |

|             |           |   |              |           |   |
|-------------|-----------|---|--------------|-----------|---|
| TC033004.25 | RBL04.280 | E | HH.013111.19 | RBL11.019 | E |
| TC041304.01 | RBL04.281 | E | HH.013111.20 | RBL11.020 | B |
| TC041304.02 | RBL04.282 | E | HH.013111.21 | RBL11.021 | S |
| TC041304.03 | RBL04.283 | E | HH.013111.22 | RBL11.022 | E |
| TC041304.04 | RBL04.284 | E | HH.013111.23 | RBL11.023 | S |
| TC041304.05 | RBL04.285 | E | HH.013111.24 | RBL11.024 | S |
| TC041304.06 | RBL04.286 | S | HH.013111.25 | RBL11.025 | E |
| TC041304.07 | RBL04.287 | B | GC.020311.01 | RBL11.026 | E |
| TC041304.08 | RBL04.288 | A | GC.020311.02 | RBL11.027 | E |
| TC041304.09 | RBL04.289 | E | GC.020311.03 | RBL11.028 | B |
| TC041304.10 | RBL04.290 | E | GC.020311.04 | RBL11.029 | E |
| TC041304.11 | RBL04.291 | E | GC.020311.05 | RBL11.030 | E |
| TC041304.12 | RBL04.292 | S | GC.020311.06 | RBL11.031 | E |
| TC041304.13 | RBL04.293 | E | GC.020311.07 | RBL11.032 | E |
| TC041304.14 | RBL04.294 | E | GC.020311.08 | RBL11.033 | E |
| TC041304.15 | RBL04.295 | E | GC.020311.09 | RBL11.034 | E |
| TC041304.16 | RBL04.296 | E | GC.020311.10 | RBL11.035 | E |
| TC041304.17 | RBL04.297 | E | GC.020311.11 | RBL11.036 | E |
| TC041304.18 | RBL04.298 | E | GC.020311.12 | RBL11.037 | E |
| TC041304.19 | RBL04.299 | S | GC.020311.13 | RBL11.038 | E |
| TC041304.20 | RBL04.300 | E | GC.020311.14 | RBL11.039 | E |
| TC041304.21 | RBL04.301 | S | GC.020311.15 | RBL11.040 | E |
| TC041304.22 | RBL04.302 | E | GC.020311.16 | RBL11.041 | E |
| TC041304.23 | RBL04.303 | B | GC.020311.17 | RBL11.042 | E |
| TC041304.24 | RBL04.304 | E | GC.020311.18 | RBL11.043 | E |
| TC041304.25 | RBL04.305 | E | GC.020311.19 | RBL11.044 | E |
| TC041304.26 | RBL04.306 | E | GC.020311.20 | RBL11.045 | V |
| TC041304.27 | RBL04.307 | E | GC.020311.21 | RBL11.046 | S |
| WC032904.01 | RBL04.308 | E | GC.020311.22 | RBL11.047 | R |
| WC032904.02 | RBL04.309 | E | GC.020311.23 | RBL11.048 | S |
| WC032904.03 | RBL04.310 | E | TC.020311.01 | RBL11.049 | E |
| WC032904.04 | RBL04.311 | E | TC.020311.02 | RBL11.050 | B |
| WC032904.05 | RBL04.312 | E | TC.020311.03 | RBL11.051 | E |
| WC032904.06 | RBL04.313 | C | TC.020311.04 | RBL11.052 | E |
| WC032904.07 | RBL04.314 | E | TC.020311.05 | RBL11.053 | E |
| WC032904.08 | RBL04.315 | E | TC.020311.06 | RBL11.054 | B |
| WC032904.09 | RBL04.316 | E | TC.020311.07 | RBL11.055 | B |
| WC032904.10 | RBL04.317 | E | TC.020311.08 | RBL11.056 | E |
| WC032904.11 | RBL04.318 | E | TC.020311.09 | RBL11.057 | E |
| WC032904.12 | RBL04.319 | E | TC.020311.10 | RBL11.058 | E |
| WC032904.13 | RBL04.320 | E | TC.020311.11 | RBL11.059 | E |

|             |           |   |              |           |   |
|-------------|-----------|---|--------------|-----------|---|
| WC032904.14 | RBL04.321 | E | TC.020311.12 | RBL11.060 | E |
| WC032904.15 | RBL04.322 | U | TC.020311.13 | RBL11.061 | B |
| WC032904.16 | RBL04.323 | F | TC.020311.14 | RBL11.062 | E |
| WC032904.17 | RBL04.324 | E | TC.020311.15 | RBL11.063 | B |
| WC032904.18 | RBL04.325 | R | TC.020311.16 | RBL11.064 | E |
| WC032904.19 | RBL04.326 | E | TC.020311.17 | RBL11.065 | A |
| WC032904.20 | RBL04.327 | B | TC.020311.18 | RBL11.066 | E |
| WC032904.21 | RBL04.328 | E | TC.020311.19 | RBL11.067 | E |
| WC032904.22 | RBL04.329 | A | TC.020311.20 | RBL11.068 | E |
| WC032904.23 | RBL04.330 | E | TC.020311.21 | RBL11.069 | A |
| WC032904.24 | RBL04.331 | E | TC.020311.22 | RBL11.070 | B |
| WC032904.25 | RBL04.332 | E | TC.020311.23 | RBL11.071 | B |
| WC041204.01 | RBL04.333 | R | TC.020311.24 | RBL11.072 | E |
| WC041204.02 | RBL04.334 | C | TC.020311.25 | RBL11.073 | A |
| WC041204.03 | RBL04.335 | R | TC.021511.01 | RBL11.074 | E |
| WC041204.04 | RBL04.336 | E | TC.021511.02 | RBL11.075 | E |
| WC041204.05 | RBL04.337 | R | TC.021511.03 | RBL11.076 | E |
| WC041204.06 | RBL04.338 | R | TC.021511.04 | RBL11.077 | S |
| WC041204.07 | RBL04.339 | R | TC.021511.05 | RBL11.078 | R |
| WC041204.08 | RBL04.340 | R | TC.021511.06 | RBL11.079 | E |
| WC041204.09 | RBL04.341 | R | TC.021511.07 | RBL11.080 | E |
| WC041204.10 | RBL04.342 | R | TC.021511.08 | RBL11.081 | E |
| WC041204.11 | RBL04.343 | R | TC.021511.09 | RBL11.082 | R |
| WC041204.12 | RBL04.344 | R | TC.021511.10 | RBL11.083 | E |
| WC041204.13 | RBL04.345 | R | TC.021511.11 | RBL11.084 | E |
| WC041204.14 | RBL04.346 | R | TC.021511.12 | RBL11.085 | E |
| WC041204.15 | RBL04.347 | C | TC.021511.13 | RBL11.086 | E |
| WC041204.16 | RBL04.348 | C | TC.021511.14 | RBL11.087 | Q |
| WC041204.17 | RBL04.349 | E | TC.021511.15 | RBL11.088 | E |
| WC041204.18 | RBL04.350 | R | TC.021511.16 | RBL11.089 | E |
| WC041204.19 | RBL04.351 | R | TC.021511.17 | RBL11.090 | E |
| WC041204.20 | RBL04.352 | E | TC.021511.18 | RBL11.091 | A |
| WC041204.21 | RBL04.353 | R | TC.021511.19 | RBL11.092 | E |
| WC041204.22 | RBL04.354 | C | TC.021511.20 | RBL11.093 | E |
| WC041204.23 | RBL04.355 | E | TC.021511.21 | RBL11.094 | E |
| WC041204.24 | RBL04.356 | C | TC.021511.22 | RBL11.095 | E |
| WC041204.25 | RBL04.357 | R | TC.021511.23 | RBL11.096 | A |
| WC050404.01 | RBL04.358 | A | TC.021511.24 | RBL11.097 | E |
| WC050404.02 | RBL04.359 | E | YC.021511.01 | RBL11.098 | E |
| WC050404.03 | RBL04.360 | B | YC.021511.02 | RBL11.099 | E |
| WC050404.04 | RBL04.361 | E | YC.021511.03 | RBL11.100 | F |



|             |           |   |              |           |   |
|-------------|-----------|---|--------------|-----------|---|
| WC050404.05 | RBL04.362 | E | YC.021511.04 | RBL11.101 | E |
| WC050404.06 | RBL04.363 | E | YC.021511.05 | RBL11.102 | K |
| WC050404.08 | RBL04.365 | E | YC.021511.06 | RBL11.103 | E |
| WC050404.09 | RBL04.366 | R | YC.021511.07 | RBL11.104 | E |
| WC050404.10 | RBL04.367 | E | YC.021511.08 | RBL11.105 | R |
| WC050404.11 | RBL04.368 | R | YC.021511.09 | RBL11.106 | E |
| WC050404.12 | RBL04.369 | B | YC.021511.10 | RBL11.107 | M |
| WC050404.13 | RBL04.370 | E | YC.021511.11 | RBL11.108 | E |
| WC050404.14 | RBL04.371 | A | YC.021511.12 | RBL11.109 | E |
| WC050404.15 | RBL04.372 | F | YC.021511.13 | RBL11.110 | E |
| WC050404.16 | RBL04.373 | E | YC.021511.14 | RBL11.111 | E |
| WC050404.17 | RBL04.374 | R | YC.021511.15 | RBL11.112 | E |
| WC050404.18 | RBL04.375 | E | YC.021511.16 | RBL11.113 | M |
| WC050404.19 | RBL04.376 | E | YC.021511.17 | RBL11.114 | E |
| WC050404.20 | RBL04.377 | E | YC.021511.18 | RBL11.115 | E |
| WC050404.21 | RBL04.378 | E | YC.021511.19 | RBL11.116 | B |
| WC050404.22 | RBL04.379 | E | YC.021511.20 | RBL11.117 | E |
| WC050404.23 | RBL04.380 | E | YC.021511.21 | RBL11.118 | C |
| WC050404.24 | RBL04.381 | A | YC.021511.22 | RBL11.119 | E |
| WC050404.25 | RBL04.382 | E | YC.021511.23 | RBL11.120 | M |
| YC012904.01 | RBL04.383 | E | YC.021511.24 | RBL11.121 | E |
| YC012904.02 | RBL04.384 | E | NM.021711.01 | RBL11.122 | G |
| YC012904.03 | RBL04.385 | R | NM.021711.02 | RBL11.123 | E |
| YC012904.04 | RBL04.386 | E | NM.021711.03 | RBL11.124 | S |
| YC012904.05 | RBL04.387 | B | NM.021711.04 | RBL11.125 | E |
| YC012904.06 | RBL04.388 | B | NM.021711.05 | RBL11.126 | F |
| YC012904.07 | RBL04.389 | E | NM.021711.06 | RBL11.127 | S |
| YC012904.08 | RBL04.390 | E | NM.022411.01 | RBL11.128 | E |
| YC012904.09 | RBL04.391 | E | NM.022411.02 | RBL11.129 | E |
| YC012904.10 | RBL04.392 | E | NM.022411.03 | RBL11.130 | C |
| YC012904.11 | RBL04.393 | E | NM.022411.04 | RBL11.131 | E |
| YC012904.12 | RBL04.394 | E | NM.022411.05 | RBL11.132 | E |
| YC012904.13 | RBL04.395 | S | NM.022411.06 | RBL11.133 | E |
| YC012904.14 | RBL04.396 | S | NM.022411.07 | RBL11.134 | E |
| YC012904.15 | RBL04.397 | R | NM.022411.08 | RBL11.135 | K |
| YC012904.16 | RBL04.398 | E | NM.022411.09 | RBL11.136 | E |
| YC012904.17 | RBL04.399 | E | NM.022411.10 | RBL11.137 | E |
| YC012904.18 | RBL04.400 | E | NM.022411.11 | RBL11.138 | E |
| YC012904.19 | RBL04.401 | R | NM.022411.12 | RBL11.139 | A |
| YC012904.20 | RBL04.402 | H | NM.022411.13 | RBL11.140 |   |
| YC012904.21 | RBL04.403 | E | NM.022411.14 | RBL11.141 | E |

|             |           |   |              |           |   |
|-------------|-----------|---|--------------|-----------|---|
| YC012904.22 | RBL04.404 | S | NM.022411.15 | RBL11.142 | E |
| YC012904.23 | RBL04.405 | F | NM.022411.16 | RBL11.143 | E |
| YC012904.24 | RBL04.406 | E | NM.022411.17 | RBL11.144 | K |
| YC012904.25 | RBL04.407 | E | NM.022411.18 | RBL11.145 | S |
| YC012904.26 | RBL04.408 | E | NM.022411.19 | RBL11.146 | A |
| YC012904.27 | RBL04.409 | E | NM.022411.20 | RBL11.147 | E |
| YC012904.28 | RBL04.410 | B | NM.022411.21 | RBL11.148 | E |
| YC021704.01 | RBL04.411 | A | NM.022411.22 | RBL11.149 | E |
| YC021704.02 | RBL04.412 | E | NM.022411.23 | RBL11.150 | A |
| YC021704.03 | RBL04.413 | E | NM.022411.24 | RBL11.151 | E |
| YC021704.04 | RBL04.414 | E | NM.022411.25 | RBL11.152 | F |
| YC021704.05 | RBL04.415 | C | YC.022811.01 | RBL11.153 | E |
| YC021704.06 | RBL04.416 | E | YC.022811.02 | RBL11.154 | E |
| YC021704.07 | RBL04.417 | E | YC.022811.03 | RBL11.155 | B |
| YC021704.08 | RBL04.418 | R | YC.022811.04 | RBL11.156 | B |
| YC021704.09 | RBL04.419 | E | YC.022811.05 | RBL11.157 | A |
| YC021704.10 | RBL04.420 | E | YC.022811.06 | RBL11.158 | E |
| YC021704.11 | RBL04.421 | E | YC.022811.07 | RBL11.159 | R |
| YC021704.12 | RBL04.422 | E | YC.022811.08 | RBL11.160 | A |
| YC021704.13 | RBL04.423 | A | YC.022811.09 | RBL11.161 | E |
| YC021704.14 | RBL04.424 | K | YC.022811.10 | RBL11.162 | E |
| YC021704.15 | RBL04.425 | E | YC.022811.11 | RBL11.163 | E |
| YC021704.16 | RBL04.426 | E | YC.022811.12 | RBL11.164 | F |
| YC021704.17 | RBL04.427 | E | YC.022811.13 | RBL11.165 | B |
| YC021704.18 | RBL04.428 | E | YC.022811.14 | RBL11.166 | A |
| YC021704.19 | RBL04.429 | E | YC.022811.15 | RBL11.167 | E |
| YC021704.20 | RBL04.430 | E | YC.022811.16 | RBL11.168 | E |
| YC021704.21 | RBL04.431 | E | YC.022811.17 | RBL11.169 | B |
| YC021704.22 | RBL04.432 | E | YC.022811.18 | RBL11.170 | B |
| YC021704.23 | RBL04.433 | E | YC.022811.19 | RBL11.171 | A |
| YC021704.24 | RBL04.434 | C | YC.022811.20 | RBL11.172 | E |
| YC021704.25 | RBL04.435 | E | YC.022811.21 | RBL11.173 | C |
| YC030104.01 | RBL04.436 | E | YC.022811.22 | RBL11.174 | B |
| YC030104.02 | RBL04.437 | E | YC.022811.23 | RBL11.175 | U |
| YC030104.03 | RBL04.438 | R | YC.022811.24 | RBL11.176 | E |
| YC030104.04 | RBL04.439 | E | YC.022811.25 | RBL11.177 | V |
| YC030104.05 | RBL04.440 | J | YC.022811.26 | RBL11.178 | E |
| YC030104.06 | RBL04.441 | E | TC.030111.01 | RBL11.179 | E |
| YC030104.07 | RBL04.442 | E | TC.030111.02 | RBL11.180 | E |
| YC030104.08 | RBL04.443 | B | TC.030111.03 | RBL11.181 | S |
| YC030104.09 | RBL04.444 | B | TC.030111.04 | RBL11.182 | E |

|             |           |   |              |           |    |
|-------------|-----------|---|--------------|-----------|----|
| YC030104.10 | RBL04.445 | B | TC.030111.05 | RBL11.183 | E  |
| YC030104.11 | RBL04.446 | S | TC.030111.06 | RBL11.184 | E  |
| YC030104.12 | RBL04.447 | E | TC.030111.07 | RBL11.185 | E  |
| YC030104.13 | RBL04.448 | E | TC.030111.08 | RBL11.186 | E  |
| YC030104.14 | RBL04.449 | A | TC.030111.09 | RBL11.187 | J  |
| YC030104.15 | RBL04.450 | S | TC.030111.10 | RBL11.188 | R  |
| YC030104.16 | RBL04.451 | R | TC.030111.11 | RBL11.189 | E  |
| YC030104.17 | RBL04.452 | E | TC.030111.12 | RBL11.190 | E  |
| YC030104.18 | RBL04.453 | R | TC.030111.13 | RBL11.191 | U  |
| YC030104.19 | RBL04.454 | E | TC.030111.14 | RBL11.192 | E  |
| YC030104.20 | RBL04.455 | E | TC.030111.15 | RBL11.193 | E  |
| YC030104.21 | RBL04.456 | B | TC.030111.16 | RBL11.194 | E  |
| YC030104.22 | RBL04.457 | E | TC.030111.17 | RBL11.195 | E  |
| YC030104.23 | RBL04.458 | S | TC.030111.18 | RBL11.196 | E  |
| YC031504.01 | RBL04.459 | J | TC.030111.19 | RBL11.197 | E  |
| YC031504.02 | RBL04.460 | E | TC.030111.20 | RBL11.198 | B  |
| YC031504.03 | RBL04.461 | E | TC.030111.21 | RBL11.199 | E  |
| YC031504.04 | RBL04.462 | E | TC.030111.22 | RBL11.200 | E  |
| YC031504.05 | RBL04.463 | E | TC.030111.23 | RBL11.201 | E  |
| YC031504.06 | RBL04.464 | E | TC.030111.24 | RBL11.202 | A  |
| YC031504.07 | RBL04.465 | F | NM.030111.01 | RBL11.206 | E  |
| YC031504.08 | RBL04.466 | E | NM.030111.02 | RBL11.207 | E  |
| YC031504.09 | RBL04.467 | R | NM.030111.03 | RBL11.208 | R  |
| YC031504.10 | RBL04.468 | B | NM.030111.04 | RBL11.209 | E  |
| YC031504.11 | RBL04.469 | E | NM.030111.05 | RBL11.210 | E  |
| YC031504.12 | RBL04.470 | E | NM.030111.06 | RBL11.211 | S  |
| YC031504.13 | RBL04.471 | E | NM.030111.07 | RBL11.212 | E  |
| YC031504.14 | RBL04.472 | S | NM.030111.08 | RBL11.213 | E  |
| YC031504.15 | RBL04.473 | B | NM.030111.09 | RBL11.214 | S  |
| YC031504.16 | RBL04.474 | E | NM.030111.10 | RBL11.215 | CC |
| YC031504.17 | RBL04.475 | E | NM.030111.11 | RBL11.216 | E  |
| YC031504.18 | RBL04.476 | E | NM.030111.12 | RBL11.217 | E  |
| YC031504.19 | RBL04.477 | E | NM.030111.13 | RBL11.218 | E  |
| YC031504.20 | RBL04.478 | E | NM.030111.14 | RBL11.219 | E  |
| YC031504.21 | RBL04.479 | E | NM.030111.15 | RBL11.220 | E  |
| YC031504.22 | RBL04.480 | F | NM.030111.16 | RBL11.221 | E  |
| YC031504.23 | RBL04.481 | E | NM.030111.17 | RBL11.222 | E  |
| YC033104.01 | RBL04.482 | E | NM.030111.18 | RBL11.223 | E  |
| YC033104.02 | RBL04.483 | E | NM.030111.19 | RBL11.224 | E  |
| YC033104.03 | RBL04.484 | E | NM.030111.20 | RBL11.225 | E  |
| YC033104.04 | RBL04.485 | E | NM.030111.21 | RBL11.226 | E  |

|             |           |   |              |           |    |
|-------------|-----------|---|--------------|-----------|----|
| YC033104.05 | RBL04.486 | V | NM.030111.22 | RBL11.227 | E  |
| YC033104.06 | RBL04.487 | B | NM.030111.23 | RBL11.228 | E  |
| YC033104.07 | RBL04.488 | F | NM.030111.24 | RBL11.229 | C  |
| YC033104.08 | RBL04.489 | S | NM.030111.25 | RBL11.230 | B  |
| YC033104.09 | RBL04.490 | B | NM.030111.26 | RBL11.231 | K  |
| YC033104.10 | RBL04.491 | A | NM.030111.27 | RBL11.232 | C  |
| YC033104.11 | RBL04.492 | E | TC.031411.01 | RBL11.233 | S  |
| YC033104.12 | RBL04.493 | E | TC.031411.02 | RBL11.234 | E  |
| YC033104.13 | RBL04.494 | E | TC.031411.03 | RBL11.235 | E  |
| YC033104.14 | RBL04.495 | E | TC.031411.04 | RBL11.236 | BB |
| YC033104.15 | RBL04.496 | E | TC.031411.05 | RBL11.237 | C  |
| YC033104.16 | RBL04.497 | E | TC.031411.06 | RBL11.238 | E  |
| YC033104.17 | RBL04.498 | V | TC.031411.07 | RBL11.239 | E  |
| YC033104.18 | RBL04.499 | E | TC.031411.08 | RBL11.240 | E  |
| YC033104.19 | RBL04.500 | B | TC.031411.09 | RBL11.241 | E  |
| YC033104.20 | RBL04.501 | S | TC.031411.10 | RBL11.242 | E  |
| YC033104.21 | RBL04.502 | E | TC.031411.11 | RBL11.243 | G  |
| YC033104.22 | RBL04.503 | E | TC.031411.12 | RBL11.244 | E  |
| YC033104.23 | RBL04.504 | E | TC.031411.13 | RBL11.245 | E  |
| YC033104.24 | RBL04.505 | V | TC.031411.14 | RBL11.246 | E  |
| YC033104.25 | RBL04.506 | E | TC.031411.15 | RBL11.247 | E  |
| YC041204.01 | RBL04.507 | E | TC.031411.16 | RBL11.248 | E  |
| YC041204.02 | RBL04.508 | A | TC.031411.17 | RBL11.249 | P  |
| YC041204.03 | RBL04.509 | E | TC.031411.18 | RBL11.250 | E  |
| YC041204.04 | RBL04.510 | E | TC.031411.19 | RBL11.251 | E  |
| YC041204.05 | RBL04.511 | E | TC.031411.20 | RBL11.252 | R  |
| YC041204.06 | RBL04.512 | R | TC.031411.21 | RBL11.253 | P  |
| YC041204.07 | RBL04.513 | E | TC.031411.22 | RBL11.254 | C  |
| YC041204.08 | RBL04.514 | E | TC.031411.23 | RBL11.255 | P  |
| YC041204.09 | RBL04.515 | A | TC.031411.24 | RBL11.256 | P  |
| YC041204.10 | RBL04.516 | R | NM.031411.01 | RBL11.257 | CC |
| YC041204.11 | RBL04.517 | A | NM.031411.02 | RBL11.258 | E  |
| YC041204.12 | RBL04.518 | E | NM.031411.03 | RBL11.259 | E  |
| YC041204.13 | RBL04.519 | E | NM.031411.04 | RBL11.260 | E  |
| YC041204.14 | RBL04.520 | E | NM.031411.05 | RBL11.261 | E  |
| YC041204.15 | RBL04.521 | E | NM.031411.06 | RBL11.262 | E  |
| YC041204.16 | RBL04.522 | B | NM.031411.07 | RBL11.263 | E  |
| YC041204.17 | RBL04.523 | E | NM.031411.08 | RBL11.264 | B  |
| YC041204.18 | RBL04.524 | E | NM.031411.09 | RBL11.265 | J  |
| YC041204.19 | RBL04.525 | E | NM.031411.10 | RBL11.266 | R  |
| YC041204.20 | RBL04.526 | B | NM.031411.11 | RBL11.267 | E  |

|             |           |   |              |           |   |
|-------------|-----------|---|--------------|-----------|---|
| YC041204.21 | RBL04.527 | E | NM.031411.12 | RBL11.268 | E |
| YC041204.22 | RBL04.528 | A | NM.031411.13 | RBL11.269 | E |
| YC041204.23 | RBL04.529 | E | NM.031411.14 | RBL11.270 | E |
| YC041204.24 | RBL04.530 | R | NM.031411.15 | RBL11.271 | E |
| YC041204.25 | RBL04.531 | E | NM.031411.16 | RBL11.272 | E |
| YC041204.26 | RBL04.532 | R | NM.031411.17 | RBL11.273 | E |
| YC041204.27 | RBL04.533 | E | NM.031411.18 | RBL11.274 | B |
| YC041204.28 | RBL04.534 | A | NM.031411.19 | RBL11.275 | E |
| YC041204.29 | RBL04.535 | A | NM.031411.20 | RBL11.276 | J |
| YC050404.01 | RBL04.536 | E | NM.031411.21 | RBL11.277 | E |
| YC050404.02 | RBL04.537 | E | NM.031411.22 | RBL11.278 | B |
| YC050404.03 | RBL04.538 | E | NM.031411.23 | RBL11.279 | S |
| YC050404.04 | RBL04.539 | E | NM.031411.24 | RBL11.280 | E |
| YC050404.05 | RBL04.540 | E | NM.031411.25 | RBL11.281 | E |
| YC050404.06 | RBL04.541 | E | YC.031511.01 | RBL11.282 | A |
| YC050404.07 | RBL04.542 | E | YC.031511.02 | RBL11.283 | E |
| YC050404.08 | RBL04.543 | E | YC.031511.03 | RBL11.284 | E |
| YC050404.09 | RBL04.544 | E | YC.031511.04 | RBL11.285 | R |
| YC050404.10 | RBL04.545 | E | YC.031511.05 | RBL11.286 | E |
| YC050404.11 | RBL04.546 | E | YC.031511.06 | RBL11.287 | E |
| YC050404.12 | RBL04.547 | E | YC.031511.07 | RBL11.288 | E |
| YC050404.13 | RBL04.548 | E | YC.031511.08 | RBL11.289 | E |
| YC050404.14 | RBL04.549 | E | YC.031511.09 | RBL11.290 | R |
| YC050404.15 | RBL04.550 | E | YC.031511.10 | RBL11.291 | B |
| YC050404.16 | RBL04.551 | E | YC.031511.11 | RBL11.292 | E |
| YC050404.17 | RBL04.552 | E | YC.031511.12 | RBL11.293 | E |
| YC050404.18 | RBL04.553 | E | YC.031511.13 | RBL11.294 | E |
| YC050404.19 | RBL04.554 | E | YC.031511.14 | RBL11.295 | P |
| YC050404.20 | RBL04.555 | E | YC.031511.15 | RBL11.296 | R |
| YC050404.21 | RBL04.556 | E | YC.031511.16 | RBL11.297 | E |
| YC050404.22 | RBL04.557 | E | YC.031511.17 | RBL11.298 | E |
| YC050404.23 | RBL04.558 | E | YC.031511.18 | RBL11.299 | P |
| YC050404.24 | RBL04.559 | E | YC.031511.19 | RBL11.300 | E |
| YC050404.25 | RBL04.560 | E | YC.031511.20 | RBL11.301 | E |
| YC050404.26 | RBL04.561 | E | YC.031511.21 | RBL11.302 | A |
| NM12605.01  | RBL05.001 | E | YC.031511.22 | RBL11.303 | E |
| NM12605.02  | RBL05.002 | E | YC.031511.23 | RBL11.304 | V |
| NM12605.03  | RBL05.003 | E | YC.032811.01 | RBL11.305 | E |
| NM12605.04  | RBL05.004 | I | YC.032811.02 | RBL11.306 | E |
| NM12605.05  | RBL05.005 | S | YC.032811.03 | RBL11.307 | F |
| NM12605.06  | RBL05.006 | E | YC.032811.04 | RBL11.308 | E |

|            |           |   |              |           |   |
|------------|-----------|---|--------------|-----------|---|
| NM12605.07 | RBL05.007 | E | YC.032811.05 | RBL11.309 | C |
| NM12605.08 | RBL05.008 | S | YC.032811.06 | RBL11.310 | E |
| NM12605.09 | RBL05.009 | E | YC.032811.07 | RBL11.311 | E |
| NM12605.10 | RBL05.010 | E | YC.032811.08 | RBL11.312 | E |
| NM12605.11 | RBL05.011 | E | YC.032811.09 | RBL11.313 | P |
| NM12605.12 | RBL05.012 | E | YC.032811.10 | RBL11.314 | E |
| NM12605.13 | RBL05.013 | E | YC.032811.11 | RBL11.315 | E |
| NM12605.14 | RBL05.014 | E | YC.032811.12 | RBL11.316 | E |
| NM12605.15 | RBL05.015 | E | YC.032811.13 | RBL11.317 | E |
| NM12605.16 | RBL05.016 | E | YC.032811.14 | RBL11.318 | B |
| NM12605.17 | RBL05.017 | I | YC.032811.15 | RBL11.319 | E |
| NM12605.18 | RBL05.018 | E | YC.032811.16 | RBL11.320 | R |
| NM12605.19 | RBL05.019 | E | YC.032811.17 | RBL11.321 | R |
| NM12605.20 | RBL05.020 | E | YC.032811.18 | RBL11.322 | E |
| NM12605.21 | RBL05.021 | E | YC.032811.19 | RBL11.323 | E |
| NM12605.22 | RBL05.022 | E | YC.032811.20 | RBL11.324 | G |
| NM12605.23 | RBL05.023 | E | YC.032811.21 | RBL11.325 | G |
| NM12605.24 | RBL05.024 | E | YC.032811.22 | RBL11.326 | E |
| NM12605.25 | RBL05.025 | E | YC.032811.23 | RBL11.327 | P |
| NM12605.26 | RBL05.026 | F | YC.032811.24 | RBL11.328 | E |
| NM2905.01  | RBL05.027 | E | YC.032811.25 | RBL11.329 | S |
| NM2905.02  | RBL05.028 | H | TC.032911.01 | RBL11.330 | E |
| NM2905.03  | RBL05.029 | K | TC.032911.02 | RBL11.331 | E |
| NM2905.04  | RBL05.030 | B | TC.032911.03 | RBL11.332 | R |
| NM2905.05  | RBL05.031 | K | TC.032911.04 | RBL11.333 | E |
| NM2905.06  | RBL05.032 | E | TC.032911.05 | RBL11.334 | E |
| NM2905.07  | RBL05.033 | E | TC.032911.06 | RBL11.335 | I |
| NM2905.08  | RBL05.034 | E | TC.032911.07 | RBL11.336 | I |
| NM2905.09  | RBL05.035 | E | TC.032911.08 | RBL11.337 | E |
| NM2905.10  | RBL05.036 | E | TC.032911.09 | RBL11.338 | E |
| NM2905.11  | RBL05.037 | E | TC.032911.10 | RBL11.339 | S |
| NM2905.12  | RBL05.038 | C | TC.032911.11 | RBL11.340 | E |
| NM2905.13  | RBL05.039 | E | TC.032911.12 | RBL11.341 | E |
| NM2905.14  | RBL05.040 | E | TC.032911.13 | RBL11.342 | I |
| NM2905.15  | RBL05.041 | E | TC.032911.14 | RBL11.343 | I |
| NM2905.16  | RBL05.042 | E | TC.032911.15 | RBL11.344 | E |
| NM2905.17  | RBL05.043 | E | TC.032911.16 | RBL11.345 | E |
| NM2905.18  | RBL05.044 | E | TC.032911.17 | RBL11.346 | E |
| NM2905.19  | RBL05.045 | E | TC.032911.18 | RBL11.347 | E |
| NM2905.20  | RBL05.046 | E | TC.032911.19 | RBL11.348 | E |
| NM2905.21  | RBL05.047 | B | TC.032911.20 | RBL11.349 | E |

|            |           |    |               |           |    |
|------------|-----------|----|---------------|-----------|----|
| NM2905.22  | RBL05.048 | E  | TC.032911.21  | RBL11.350 | BB |
| NM2905.23  | RBL05.049 | A  | TC.032911.22  | RBL11.351 | S  |
| NM2905.24  | RBL05.050 | H  | TC.032911.23  | RBL11.352 | R  |
| NM2905.25  | RBL05.051 | G  | TC.032911.24  | RBL11.353 | I  |
| NM2905.26  | RBL05.052 | S  | TC.032911.25  | RBL11.354 | E  |
| NM2905.27  | RBL05.053 | E  | WC.032911.01  | RBL11.355 | M  |
| NM22505.01 | RBL05.054 | E  | WC.032911.02  | RBL11.356 | E  |
| NM22505.02 | RBL05.055 | E  | WC.032911.03  | RBL11.357 | E  |
| NM22505.03 | RBL05.056 | E  | WC.032911.04  | RBL11.358 | G  |
| NM22505.04 | RBL05.057 | BB | WC.032911.05  | RBL11.359 | E  |
| NM22505.05 | RBL05.058 | D  | WC.032911.06  | RBL11.360 | R  |
| NM22505.06 | RBL05.059 | E  | WC.032911.07  | RBL11.361 | E  |
| NM22505.07 | RBL05.060 | E  | WC.032911.08  | RBL11.362 | E  |
| NM22505.08 | RBL05.061 | E  | WC.032911.09  | RBL11.363 | E  |
| NM22505.09 | RBL05.062 | A  | WC.032911.10  | RBL11.364 | E  |
| NM22505.10 | RBL05.063 | F  | WC.032911.11  | RBL11.365 | E  |
| NM22505.11 | RBL05.064 | E  | WC.032911.12  | RBL11.366 | E  |
| NM22505.12 | RBL05.065 | E  | WC.032911.13  | RBL11.367 | F  |
| NM22505.13 | RBL05.066 | A  | WC.032911.14  | RBL11.368 | U  |
| NM22505.14 | RBL05.067 | E  | WC.032911.15  | RBL11.369 | R  |
| NM22505.15 | RBL05.068 | E  | WC.032911.16  | RBL11.370 | M  |
| NM22505.16 | RBL05.069 | E  | WC.032911.17  | RBL11.371 | A  |
| NM22505.17 | RBL05.070 | E  | WC.032911.18  | RBL11.372 | E  |
| NM22505.18 | RBL05.071 | E  | WC.032911.19  | RBL11.373 | E  |
| NM22505.19 | RBL05.072 | E  | WC.032911.20  | RBL11.374 | S  |
| NM22505.20 | RBL05.073 | F  | WC.032911.21  | RBL11.375 | E  |
| NM22505.21 | RBL05.074 | E  | WC.032911.22  | RBL11.376 | E  |
| NM22505.22 | RBL05.075 | E  | WC.032911.23  | RBL11.377 | E  |
| NM22505.23 | RBL05.076 | E  | WC.032911.24  | RBL11.378 | E  |
| NM22505.24 | RBL05.077 | E  | WC.032911.25  | RBL11.379 | R  |
| NM22505.25 | RBL05.078 | E  | UL..033011.01 | RBL11.380 | B  |
| NM3705.01  | RBL05.079 | E  | UL..033011.02 | RBL11.381 | E  |
| NM3705.02  | RBL05.080 | E  | UL..033011.03 | RBL11.382 | E  |
| NM3705.03  | RBL05.081 | E  | UL..033011.04 | RBL11.383 | E  |
| NM3705.04  | RBL05.082 | S  | UL..033011.05 | RBL11.384 | E  |
| NM3705.05  | RBL05.083 | S  | UL..033011.06 | RBL11.385 | E  |
| NM3705.06  | RBL05.084 | Z  | UL..033011.07 | RBL11.386 | E  |
| NM3705.07  | RBL05.085 | S  | UL..033011.08 | RBL11.387 | E  |
| NM3705.08  | RBL05.086 | E  | UL..033011.09 | RBL11.388 | E  |
| NM3705.09  | RBL05.087 | A  | UL..033011.10 | RBL11.389 | E  |
| NM3705.10  | RBL05.088 | E  | UL..033011.11 | RBL11.390 | B  |

|            |           |   |               |           |    |
|------------|-----------|---|---------------|-----------|----|
| NM3705.11  | RBL05.089 | E | UL..033011.12 | RBL11.391 | E  |
| NM3705.12  | RBL05.090 | E | UL..033011.13 | RBL11.392 | P  |
| NM3705.13  | RBL05.091 | E | UL..033011.14 | RBL11.393 | E  |
| NM3705.14  | RBL05.092 | E | UL..033011.15 | RBL11.394 | E  |
| NM3705.15  | RBL05.093 | E | UL..033011.16 | RBL11.395 | E  |
| NM3705.16  | RBL05.094 | K | UL..033011.17 | RBL11.396 | E  |
| NM3705.17  | RBL05.095 | H | UL..033011.18 | RBL11.397 | E  |
| NM3705.18  | RBL05.096 | E | UL..033011.19 | RBL11.398 | E  |
| NM3705.19  | RBL05.097 | E | UL..033011.20 | RBL11.399 | E  |
| NM3705.20  | RBL05.098 | E | UL..033011.21 | RBL11.400 | E  |
| NM3705.21  | RBL05.099 | E | UL..033011.22 | RBL11.401 | E  |
| NM3705.22  | RBL05.100 | E | UL..033011.23 | RBL11.402 | E  |
| NM3705.23  | RBL05.101 | E | UL..033011.24 | RBL11.403 | E  |
| NM3705.24  | RBL05.102 | E | UL..033011.25 | RBL11.404 | E  |
| NM3705.25  | RBL05.103 | E | NM.033111.01  | RBL11.405 | E  |
| NM3705.26  | RBL05.104 | R | NM.033111.02  | RBL11.406 | E  |
| NM3705.27  | RBL05.105 | E | NM.033111.03  | RBL11.407 | HH |
| NM3705.28  | RBL05.106 | R | NM.033111.04  | RBL11.408 | E  |
| NM32105.01 | RBL05.107 | S | NM.033111.05  | RBL11.409 | A  |
| NM32105.02 | RBL05.108 | E | NM.033111.06  | RBL11.410 | E  |
| NM32105.03 | RBL05.109 | E | NM.033111.07  | RBL11.411 | P  |
| NM32105.04 | RBL05.110 | R | NM.033111.08  | RBL11.412 | R  |
| NM32105.05 | RBL05.111 | E | NM.033111.09  | RBL11.413 | R  |
| NM32105.06 | RBL05.112 | E | NM.033111.10  | RBL11.414 | E  |
| NM32105.07 | RBL05.113 | V | NM.033111.11  | RBL11.415 | R  |
| NM32105.08 | RBL05.114 | E | NM.033111.12  | RBL11.416 | R  |
| NM32105.09 | RBL05.115 | E | NM.033111.13  | RBL11.417 | E  |
| NM32105.10 | RBL05.116 | B | NM.033111.14  | RBL11.418 | A  |
| NM32105.11 | RBL05.117 | E | NM.033111.15  | RBL11.419 | S  |
| NM32105.12 | RBL05.118 | E | NM.033111.16  | RBL11.420 | C  |
| NM32105.13 | RBL05.119 | E | NM.033111.17  | RBL11.421 | S  |
| NM32105.14 | RBL05.120 | E | NM.033111.18  | RBL11.422 | B  |
| NM32105.15 | RBL05.121 | V | NM.033111.19  | RBL11.423 | E  |
| NM32105.16 | RBL05.122 | E | NM.033111.20  | RBL11.424 | E  |
| NM32105.17 | RBL05.123 | R | NM.033111.21  | RBL11.425 | S  |
| NM32105.18 | RBL05.124 | E | NM.033111.22  | RBL11.426 | E  |
| NM32105.19 | RBL05.125 | S | NM.033111.23  | RBL11.427 | E  |
| NM32105.20 | RBL05.126 | E | NM.033111.24  | RBL11.428 | E  |
| NM32105.21 | RBL05.127 | S | NM.033111.25  | RBL11.429 | C  |
| NM32105.22 | RBL05.128 | E | LL.040511.01  | RBL11.430 | E  |
| NM32105.23 | RBL05.129 | R | LL.040511.02  | RBL11.431 | U  |



|            |           |   |              |           |    |
|------------|-----------|---|--------------|-----------|----|
| NM32105.24 | RBL05.130 | B | LL.040511.03 | RBL11.432 | R  |
| NM32105.25 | RBL05.131 | A | LL.040511.04 | RBL11.433 | E  |
| NM32105.26 | RBL05.132 | E | LL.040511.05 | RBL11.434 | E  |
| NM32105.27 | RBL05.133 | B | LL.040511.06 | RBL11.435 | G  |
| NM32105.28 | RBL05.134 | C | LL.040511.07 | RBL11.436 | G  |
| NM4505.01  | RBL05.135 | B | LL.040511.08 | RBL11.437 | BB |
| NM4505.02  | RBL05.136 | V | LL.040511.09 | RBL11.438 | E  |
| NM4505.03  | RBL05.137 | R | LL.040511.10 | RBL11.439 | E  |
| NM4505.04  | RBL05.138 | B | LL.040511.11 | RBL11.440 | S  |
| NM4505.05  | RBL05.139 | B | LL.040511.12 | RBL11.441 | E  |
| NM4505.06  | RBL05.140 | R | LL.040511.13 | RBL11.442 | E  |
| NM4505.07  | RBL05.141 | E | LL.040511.14 | RBL11.443 | S  |
| NM4505.08  | RBL05.142 | E | LL.040511.15 | RBL11.444 | R  |
| NM4505.09  | RBL05.143 | S | LL.040511.16 | RBL11.445 | E  |
| NM4505.10  | RBL05.144 | E | LL.040511.17 | RBL11.446 | A  |
| NM4505.11  | RBL05.145 | E | LL.040511.18 | RBL11.447 | E  |
| NM4505.12  | RBL05.146 | E | LL.040511.19 | RBL11.448 | E  |
| NM4505.13  | RBL05.147 | E | LL.040511.20 | RBL11.449 | A  |
| NM4505.14  | RBL05.148 | R | LL.040511.21 | RBL11.450 | E  |
| NM4505.15  | RBL05.149 | P | LL.040511.22 | RBL11.451 | E  |
| NM4505.16  | RBL05.150 | E | LL.040511.23 | RBL11.452 | J  |
| NM4505.17  | RBL05.151 | E | LL.040511.24 | RBL11.453 | J  |
| NM4505.18  | RBL05.152 | R | LL.040511.25 | RBL11.454 | P  |
| NM4505.19  | RBL05.153 | A | WC.041411.01 | RBL11.455 | S  |
| NM4505.20  | RBL05.154 | R | WC.041411.02 | RBL11.456 | E  |
| NM4505.21  | RBL05.155 | F | WC.041411.03 | RBL11.457 | P  |
| NM4505.22  | RBL05.156 | P | WC.041411.04 | RBL11.458 | E  |
| NM4505.23  | RBL05.157 | G | WC.041411.05 | RBL11.459 | E  |
| NM4505.24  | RBL05.158 | E | WC.041411.06 | RBL11.460 | E  |
| NM4505.25  | RBL05.159 | E | WC.041411.07 | RBL11.461 | E  |
| TC21005.01 | RBL05.160 | A | WC.041411.08 | RBL11.462 | P  |
| TC21005.02 | RBL05.161 | A | WC.041411.09 | RBL11.463 | E  |
| TC21005.03 | RBL05.162 | E | WC.041411.10 | RBL11.464 | E  |
| TC21005.04 | RBL05.163 | E | WC.041411.11 | RBL11.465 | E  |
| TC21005.05 | RBL05.164 | S | WC.041411.12 | RBL11.466 | F  |
| TC21005.06 | RBL05.165 | S | WC.041411.13 | RBL11.467 | E  |
| TC21005.07 | RBL05.166 | A | WC.041411.14 | RBL11.468 | II |
| TC21005.08 | RBL05.167 | E | WC.041411.15 | RBL11.469 | E  |
| TC21005.09 | RBL05.168 | A | WC.041411.16 | RBL11.470 | P  |
| TC21005.10 | RBL05.169 | B | WC.041411.17 | RBL11.471 | G  |
| TC21005.11 | RBL05.170 | E | WC.041411.18 | RBL11.472 | Q  |

|            |           |   |              |           |   |
|------------|-----------|---|--------------|-----------|---|
| TC21005.12 | RBL05.171 | A | WC.041411.19 | RBL11.473 | S |
| TC21005.13 | RBL05.172 | A | WC.041411.20 | RBL11.474 | E |
| TC21005.14 | RBL05.173 | E | WC.041411.21 | RBL11.475 | A |
| TC21005.15 | RBL05.174 | E | WC.041411.22 | RBL11.476 | E |
| TC21005.16 | RBL05.175 | E | WC.041411.23 | RBL11.477 | E |
| TC21005.17 | RBL05.176 | S | WC.041411.24 | RBL11.478 | R |
| TC21005.18 | RBL05.177 | A | WC.041411.25 | RBL11.479 | A |
| TC21005.19 | RBL05.178 | E | WC.042611.01 | RBL11.480 | E |
| TC21005.20 | RBL05.179 | A | WC.042611.02 | RBL11.481 | B |
| TC21005.21 | RBL05.180 | A | WC.042611.03 | RBL11.482 | C |
| TC21005.22 | RBL05.181 | A | WC.042611.04 | RBL11.483 | J |
| TC21005.23 | RBL05.182 | E | WC.042611.05 | RBL11.484 | E |
| TC21005.24 | RBL05.183 | E | WC.042611.06 | RBL11.485 | F |
| TC21005.25 | RBL05.184 | E | WC.042611.07 | RBL11.486 | E |
| TC22305.01 | RBL05.185 | B | WC.042611.08 | RBL11.487 | E |
| TC22305.02 | RBL05.186 | R | WC.042611.09 | RBL11.488 | E |
| TC22305.03 | RBL05.187 | S | WC.042611.10 | RBL11.489 | P |
| TC22305.04 | RBL05.188 | E | WC.042611.11 | RBL11.490 | E |
| TC22305.05 | RBL05.189 | E | WC.042611.12 | RBL11.491 | B |
| TC22305.06 | RBL05.190 | S | WC.042611.13 | RBL11.492 | E |
| TC22305.07 | RBL05.191 | B | WC.042611.14 | RBL11.493 | E |
| TC22305.08 | RBL05.192 | E | WC.042611.15 | RBL11.494 | E |
| TC22305.09 | RBL05.193 | E | WC.042611.16 | RBL11.495 | E |
| TC22305.11 | RBL05.195 | R | WC.042611.17 | RBL11.496 | E |
| TC22305.12 | RBL05.196 | E | WC.042611.18 | RBL11.497 | C |
| TC22305.13 | RBL05.197 | E | WC.042611.19 | RBL11.498 | B |
| TC22305.14 | RBL05.198 | B | WC.042611.20 | RBL11.499 | S |
| TC22305.15 | RBL05.199 | E | WC.042611.21 | RBL11.500 | C |
| TC22305.16 | RBL05.200 | A | WC.042611.22 | RBL11.501 | E |
| TC22305.17 | RBL05.201 | S | WC.042611.23 | RBL11.502 | E |
| TC22305.18 | RBL05.202 | B | WC.042611.24 | RBL11.503 | E |
| TC22305.19 | RBL05.203 | R | WC.042611.25 | RBL11.504 | E |
| TC22305.20 | RBL05.204 | B | YC.042711.01 | RBL11.505 | E |
| TC22305.21 | RBL05.205 | E | YC.042711.02 | RBL11.506 | B |
| TC22305.22 | RBL05.206 | B | YC.042711.03 | RBL11.507 | E |
| TC22305.23 | RBL05.207 | R | YC.042711.04 | RBL11.508 | E |
| TC22305.24 | RBL05.208 | E | YC.042711.05 | RBL11.509 | E |
| TC22305.25 | RBL05.209 | B | YC.042711.06 | RBL11.510 | E |
| TC3705.01  | RBL05.210 | E | YC.042711.07 | RBL11.511 | R |
| TC3705.02  | RBL05.211 | B | YC.042711.08 | RBL11.512 | E |
| TC3705.03  | RBL05.212 | E | YC.042711.09 | RBL11.513 | E |

|           |           |   |              |           |   |
|-----------|-----------|---|--------------|-----------|---|
| TC3705.04 | RBL05.213 | E | YC.042711.10 | RBL11.514 | E |
| TC3705.05 | RBL05.214 | S | YC.042711.11 | RBL11.515 | R |
| TC3705.06 | RBL05.215 | E | YC.042711.12 | RBL11.516 | E |
| TC3705.07 | RBL05.216 | S | YC.042711.13 | RBL11.517 | E |
| TC3705.08 | RBL05.217 | E | YC.042711.14 | RBL11.518 | B |
| TC3705.09 | RBL05.218 | E | YC.042711.15 | RBL11.519 | R |
| TC3705.10 | RBL05.219 | E | YC.042711.16 | RBL11.520 | E |
| TC3705.11 | RBL05.220 | E | YC.042711.17 | RBL11.521 | E |
| TC3705.12 | RBL05.221 | E | YC.042711.18 | RBL11.522 | R |
| TC3705.13 | RBL05.222 | E | YC.042711.19 | RBL11.523 | E |
| TC3705.14 | RBL05.223 | E | YC.042711.20 | RBL11.524 | R |
| TC3705.15 | RBL05.224 | E | YC.042711.21 | RBL11.525 | E |
| TC3705.16 | RBL05.225 | S | YC.042711.22 | RBL11.526 | E |
| TC3705.17 | RBL05.226 | E | YC.042711.23 | RBL11.527 | B |
| TC3705.18 | RBL05.227 | E | YC.042711.24 | RBL11.528 | E |
| TC3705.19 | RBL05.228 | E | YC.042711.25 | RBL11.529 | E |
| TC3705.20 | RBL05.229 | E |              |           |   |

---

**Supplemental Table 3.** Population genetic statistics for mtDNA haplotypes from each sample collected from 2004-2011 for

razorback sucker in Lake Mohave, Arizona and Nevada; see Fig. 1 for Area locations. N is the sample size,  $N_h$  is the number of haplotypes observed, and  $A_R$  is the number of haplotypes corrected for sample size by rarefaction (Kalinowski 2005). “Sig” indicates significance ( $P < 0.05$ ) as determined by resampling. “na” indicates statistic not calculated due to small sample size, while “-” and “ns” indicated significant and not significant, respectively. Statistics for the samples collected from 1997-2003 are reported in Dowling *et al.* (2005).

| Year | Area           | Date   | N  | $N_h$ | $H_R$ | sig | gene diversity | sig |
|------|----------------|--------|----|-------|-------|-----|----------------|-----|
| 2004 | Nine Mile area | 3-Feb  | 10 | 2     | na    | na  | 0.20+/-0.15    | na  |
| 2004 | Nine Mile area | 6-Feb  | 15 | 8     | na    | na  | 0.73+/-0.12    | na  |
| 2004 | Nine Mile area | 17-Feb | 4  | 1     | na    | na  | 0              | na  |
| 2004 | Nine Mile area | 20-Feb | 25 | 7     | 6.36  | ns  | 0.67+/-0.10    | ns  |
| 2004 | Nine Mile area | 1-Mar  | 25 | 5     | 4.56  | ns  | 0.48+/-0.12    | ns  |
| 2004 | Nine Mile area | 15-Mar | 23 | 7     | 6.34  | ns  | 0.52+/-0.12    | ns  |
| 2004 | Nine Mile area | 29-Mar | 25 | 6     | 5.40  | ns  | 0.72+/-0.06    | ns  |
| 2004 | Nine Mile area | 13-Apr | 21 | 8     | 7.76  | ns  | 0.72+/-0.10    | ns  |
| 2004 | Tequila Cove   | 3-Feb  | 27 | 3     | 2.73  | -   | 0.27+/-0.11    | -   |
| 2004 | Tequila Cove   | 18-Feb | 25 | 4     | 3.80  | -   | 0.68+/-0.06    | ns  |
| 2004 | Tequila Cove   | 2-Mar  | 25 | 3     | 2.97  | -   | 0.45+/-0.10    | ns  |
| 2004 | Tequila Cove   | 17-Mar | 29 | 3     | 2.38  | -   | 0.14+/-0.09    | -   |
| 2004 | Tequila Cove   | 30-Mar | 25 | 6     | 5.56  | ns  | 0.75+/-0.06    | ns  |
| 2004 | Tequila Cove   | 13-Apr | 27 | 4     | 3.68  | -   | 0.44+/-0.11    | -   |
| 2004 | Wrong Cove     | 29-Mar | 25 | 7     | 5.80  | ns  | 0.43+/-0.12    | ns  |
| 2004 | Wrong Cove     | 12-Apr | 25 | 3     | 3.00  | -   | 0.55+/-0.09    | ns  |
| 2004 | Wrong Cove     | 4-May  | 24 | 5     | 4.81  | ns  | 0.59+/-0.11    | ns  |

**Supplemental Table 3.** Continued

|      |                |        |    |   |      |    |              |    |
|------|----------------|--------|----|---|------|----|--------------|----|
| 2004 | Yuma Cove      | 29-Jan | 28 | 7 | 5.38 | ns | 0.64+/-0.09  | ns |
| 2004 | Yuma Cove      | 17-Feb | 25 | 5 | 4.53 | ns | 0.42+/- 0.12 | ns |
| 2004 | Yuma Cove      | 1-Mar  | 23 | 6 | 5.74 | ns | 0.74+/-0.08  | ns |
| 2004 | Yuma Cove      | 15-Mar | 23 | 6 | 5.59 | ns | 0.52+/-0.12  | ns |
| 2004 | Yuma Cove      | 31-Mar | 25 | 6 | 5.56 | ns | 0.63+/-0.10  | ns |
| 2004 | Yuma Cove      | 12-Apr | 29 | 4 | 3.91 | -  | 0.61+/-0.08  | ns |
| 2004 | Yuma Cove      | 4-May  | 26 | 1 | 1.00 | -  | 0            | -  |
| 2005 | Nine Mile area | 26-Jan | 26 | 4 | 3.68 | -  | 0.35+/-0.12  | -  |
| 2005 | Nine Mile area | 9-Feb  | 27 | 8 | 6.78 | ns | 0.60+/-0.11  | ns |
| 2005 | Nine Mile area | 25-Feb | 25 | 5 | 4.53 | ns | 0.42+/-0.12  | -  |
| 2005 | Nine Mile area | 7-Mar  | 28 | 7 | 5.77 | ns | 0.54+/-0.11  | ns |
| 2005 | Nine Mile area | 21-Mar | 28 | 7 | 6.30 | ns | 0.70+/-0.09  | ns |
| 2005 | Nine Mile area | 5-Apr  | 25 | 9 | 7.96 | ns | 0.80+/-0.06  | ns |
| 2005 | Tequila Cove   | 10-Feb | 25 | 4 | 3.80 | -  | 0.66+/-0.06  | ns |
| 2005 | Tequila Cove   | 23-Feb | 24 | 5 | 4.83 | ns | 0.76+/-0.05  | ns |
| 2005 | Tequila Cove   | 7-Mar  | 28 | 3 | 2.70 | -  | 0.26+/-0.10  | -  |
| 2005 | Tequila Cove   | 21-Mar | 26 | 7 | 6.07 | ns | 0.65+/-0.10  | ns |
| 2005 | Tequila Cove   | 5-Apr  | 24 | 3 | 2.83 | -  | 0.36+/-0.11  | -  |
| 2005 | Yuma Cove      | 25-Jan | 26 | 7 | 6.03 | ns | 0.67+/-0.08  | ns |
| 2005 | Yuma Cove      | 8-Feb  | 26 | 4 | 3.76 | -  | 0.60+/-0.08  | ns |
| 2005 | Yuma Cove      | 23-Feb | 25 | 7 | 6.16 | ns | 0.59+/-0.11  | ns |
| 2005 | Yuma Cove      | 8-Mar  | 25 | 5 | 4.76 | ns | 0.65+/-0.09  | ns |
| 2005 | Yuma Cove      | 22-Mar | 25 | 6 | 5.56 | ns | 0.66+/-0.09  | ns |
| 2005 | Yuma Cove      | 5-Apr  | 24 | 6 | 5.33 | ns | 0.58+/-0.10  | ns |

**Supplemental Table 3.** Continued

|      |                |        |    |   |      |    |             |    |
|------|----------------|--------|----|---|------|----|-------------|----|
| 2006 | Nine Mile area | 7-Feb  | 25 | 9 | 7.99 | ns | 0.81+/-0.06 | ns |
| 2006 | Nine Mile area | 23-Feb | 25 | 8 | 6.97 | ns | 0.73+/-0.08 | ns |
| 2006 | Nine Mile area | 7-Mar  | 25 | 5 | 4.56 | ns | 0.48+/-0.12 | ns |
| 2006 | Nine Mile area | 15-Mar | 26 | 3 | 2.99 | -  | 0.45+/-0.11 | ns |
| 2006 | Nine Mile area | 21-Mar | 25 | 6 | 5.17 | ns | 0.43+/-0.12 | -  |
| 2006 | Nine Mile area | 6-Apr  | 25 | 5 | 4.59 | ns | 0.53+/-0.11 | ns |
| 2006 | Tequila Cove   | 8-Feb  | 25 | 4 | 3.97 | -  | 0.64+/-0.08 | ns |
| 2006 | Tequila Cove   | 21-Feb | 25 | 4 | 3.97 | -  | 0.67+/-0.07 | ns |
| 2006 | Tequila Cove   | 7-Mar  | 24 | 6 | 5.64 | ns | 0.76+/-0.06 | ns |
| 2006 | Tequila Cove   | 15-Mar | 23 | 6 | 5.60 | ns | 0.57+/-0.11 | ns |
| 2006 | Tequila Cove   | 22-Mar | 25 | 5 | 4.53 | ns | 0.42+/-0.12 | -  |
| 2006 | Tequila Cove   | 5-Apr  | 24 | 4 | 3.93 | ns | 0.44+/-0.12 | ns |
| 2006 | Tequila Cove   | 27-Apr | 24 | 4 | 3.81 | ns | 0.56+/-0.09 | ns |
| 2006 | Wrong Cove     | 22-Mar | 24 | 6 | 5.48 | ns | 0.59+/-0.11 | ns |
| 2006 | Wrong Cove     | 4-Apr  | 22 | 7 | 6.81 | ns | 0.80+/-0.07 | ns |
| 2006 | Wrong Cove     | 27-Apr | 25 | 3 | 2.60 | -  | 0.16+/-0.10 | -  |
| 2006 | Yuma Cove      | 7-Feb  | 26 | 6 | 4.85 | ns | 0.35+/-0.12 | -  |
| 2006 | Yuma Cove      | 23-Feb | 25 | 7 | 6.33 | ns | 0.63+/-0.10 | ns |
| 2006 | Yuma Cove      | 8-Mar  | 25 | 8 | 7.13 | ns | 0.71+/-0.09 | ns |
| 2006 | Yuma Cove      | 14-Mar | 26 | 4 | 3.72 | -  | 0.50+/-0.10 | ns |
| 2006 | Yuma Cove      | 22-Mar | 25 | 5 | 4.59 | ns | 0.53+/-0.11 | ns |
| 2006 | Yuma Cove      | 5-Apr  | 24 | 6 | 5.60 | ns | 0.55+/-0.12 | ns |
| 2006 | Yuma Cove      | 25-Apr | 28 | 3 | 2.98 | -  | 0.61+/-0.05 | ns |
| 2007 | Nine Mile area | 6-Feb  | 25 | 7 | 6.36 | ns | 0.75+/-0.07 | ns |
| 2007 | Nine Mile area | 23-Feb | 5  | 3 | na   | na | 0.70+/-0.22 | na |
| 2007 | Nine Mile area | 27-Feb | 20 | 6 | 6.00 | ns | 0.80+/-0.05 | ns |
| 2007 | Nine Mile area | 15-Mar | 25 | 5 | 4.53 | ns | 0.42+/-0.12 | -  |

**Supplemental Table 3.** Continued

|      |                |        |    |   |      |    |             |    |
|------|----------------|--------|----|---|------|----|-------------|----|
| 2007 | Tequila Cove   | 7-Feb  | 25 | 4 | 3.96 | -  | 0.60+/-0.09 | ns |
| 2007 | Tequila Cove   | 20-Feb | 23 | 7 | 6.73 | ns | 0.81+/-0.06 | ns |
| 2007 | Tequila Cove   | 14-Mar | 25 | 5 | 4.40 | ns | 0.47+/-0.11 | ns |
| 2007 | Wrong Cove     | 5-Apr  | 25 | 7 | 5.97 | ns | 0.49+/-0.12 | ns |
| 2007 | Wrong Cove     | 17-Apr | 25 | 7 | 6.00 | ns | 0.62+/-0.10 | ns |
| 2007 | Yuma Cove      | 5-Feb  | 25 | 6 | 5.37 | ns | 0.61+/-0.10 | ns |
| 2007 | Yuma Cove      | 20-Feb | 25 | 9 | 7.93 | ns | 0.72+/-0.09 | ns |
| 2007 | Yuma Cove      | 12-Mar | 35 | 7 | 5.91 | ns | 0.72+/-0.07 | ns |
| 2007 | Yuma Cove      | 14-Mar | 25 | 8 | 6.60 | ns | 0.49+/-0.12 | ns |
| 2008 | Nine Mile area | 5-Feb  | 25 | 9 | 8.07 | ns | 0.73+/-0.09 | ns |
| 2008 | Nine Mile area | 26-Feb | 25 | 6 | 5.53 | ns | 0.58+/-0.11 | ns |
| 2008 | Nine Mile area | 3-Mar  | 25 | 7 | 6.00 | ns | 0.53+/-0.12 | ns |
| 2008 | Nine Mile area | 18-Mar | 25 | 7 | 6.30 | ns | 0.59+/-0.11 | ns |
| 2008 | Nine Mile area | 31-Mar | 25 | 6 | 5.37 | ns | 0.58+/-0.11 | ns |
| 2008 | Nine Mile area | 29-Apr | 25 | 3 | 2.77 | -  | 0.23+/-0.11 | -  |
| 2008 | Tequila Cove   | 5-Feb  | 25 | 5 | 4.59 | ns | 0.53+/-0.11 | ns |
| 2008 | Tequila Cove   | 22-Feb | 25 | 5 | 4.59 | ns | 0.53+/-0.11 | ns |
| 2008 | Tequila Cove   | 4-Mar  | 25 | 7 | 6.36 | ns | 0.67+/-0.10 | ns |
| 2008 | Tequila Cove   | 18-Mar | 25 | 4 | 3.60 | -  | 0.53+/-0.09 | ns |
| 2008 | Tequila Cove   | 31-Mar | 25 | 6 | 5.36 | ns | 0.53+/-0.11 | ns |
| 2008 | Tequila Cove   | 15-Apr | 25 | 2 | 2.00 | -  | 0.52+/-0.03 | ns |
| 2008 | Tequila Cove   | 14-May | 25 | 6 | 5.79 | ns | 0.81+/-0.05 | ns |
| 2008 | Wrong Cove     | 3-Apr  | 25 | 9 | 8.13 | ns | 0.81+/-0.06 | ns |
| 2008 | Wrong Cove     | 14-Apr | 25 | 4 | 3.97 | -  | 0.64+/-0.08 | ns |
| 2008 | Wrong Cove     | 30-Apr | 25 | 6 | 5.56 | ns | 0.69+/-0.08 | ns |
| 2008 | Wrong Cove     | 15-May | 8  | 2 | na   | na | 0.25+/-0.18 | na |

**Supplemental Table 3.** Continued

|      |                |        |    |   |      |    |             |    |
|------|----------------|--------|----|---|------|----|-------------|----|
| 2008 | Yuma Cove      | 6-Feb  | 25 | 6 | 5.53 | ns | 0.58+/-0.11 | ns |
| 2008 | Yuma Cove      | 19-Feb | 21 | 8 | 7.81 | ns | 0.72+/-0.10 | ns |
| 2008 | Yuma Cove      | 4-Mar  | 25 | 3 | 2.93 | -  | 0.29+/-0.11 | -  |
| 2008 | Yuma Cove      | 18-Mar | 25 | 7 | 5.80 | ns | 0.43+/-0.12 | ns |
| 2008 | Yuma Cove      | 1-Apr  | 25 | 2 | 1.80 | -  | 0.08+/-0.07 | -  |
| 2008 | Yuma Cove      | 14-Apr | 22 | 5 | 4.82 | ns | 0.75+/-0.05 | ns |
| 2008 | Yuma Cove      | 30-Apr | 25 | 5 | 4.76 | ns | 0.70+/-0.07 | ns |
| 2009 | Nine Mile area | 6-Feb  | 25 | 7 | 6.36 | ns | 0.71+/-0.09 | ns |
| 2009 | Nine Mile area | 17-Feb | 25 | 7 | 6.73 | ns | 0.82+/-0.05 | ns |
| 2009 | Nine Mile area | 2-Mar  | 25 | 5 | 4.57 | ns | 0.60+/-0.09 | ns |
| 2009 | Nine Mile area | 18-Mar | 25 | 5 | 4.73 | ns | 0.53+/-0.11 | ns |
| 2009 | Nine Mile area | 31-Mar | 24 | 4 | 3.66 | ns | 0.37+/-0.18 | -  |
| 2009 | Tequila Cove   | 6-Feb  | 25 | 3 | 3.00 | -  | 0.61+/-0.07 | ns |
| 2009 | Tequila Cove   | 17-Feb | 25 | 6 | 5.56 | ns | 0.74+/-0.06 | ns |
| 2009 | Tequila Cove   | 2-Mar  | 25 | 5 | 4.70 | ns | 0.48+/-0.12 | ns |
| 2009 | Tequila Cove   | 16-Mar | 25 | 4 | 3.80 | -  | 0.59+/-0.09 | ns |
| 2009 | Tequila Cove   | 31-Mar | 25 | 2 | 2.00 | -  | 0.38+/-0.09 | -  |
| 2009 | Tequila Cove   | 13-Apr | 25 | 4 | 4.00 | -  | 0.74+/-0.05 | ns |
| 2009 | Wrong Cove     | 17-Mar | 25 | 6 | 5.57 | ns | 0.70+/-0.08 | ns |
| 2009 | Wrong Cove     | 31-Mar | 24 | 7 | 6.33 | ns | 0.74+/-0.07 | ns |
| 2009 | Wrong Cove     | 13-Apr | 25 | 7 | 6.33 | ns | 0.63+/-0.10 | ns |
| 2009 | Yuma Cove      | 6-Feb  | 21 | 5 | 4.86 | ns | 0.42+/-0.13 | ns |
| 2009 | Yuma Cove      | 17-Feb | 25 | 5 | 4.56 | ns | 0.48+/-0.12 | ns |
| 2009 | Yuma Cove      | 2-Mar  | 23 | 7 | 6.40 | ns | 0.82+/-0.04 | ns |
| 2009 | Yuma Cove      | 18-Mar | 25 | 7 | 6.16 | ns | 0.59+/-0.11 | ns |
| 2009 | Yuma Cove      | 20-Mar | 23 | 9 | 8.20 | ns | 0.72+/-0.10 | ns |
| 2009 | Yuma Cove      | 31-Mar | 25 | 6 | 5.57 | ns | 0.76+/-0.05 | ns |
| 2009 | Yuma Cove      | 17-Apr | 25 | 4 | 4.00 | -  | 0.75+/-0.04 | ns |



**Supplemental Table 3. Continued**

|      |                |        |    |   |      |    |             |    |
|------|----------------|--------|----|---|------|----|-------------|----|
| 2010 | Nine Mile area | 3-Feb  | 25 | 7 | 6.53 | ns | 0.74+/-0.08 | ns |
| 2010 | Nine Mile area | 16-Feb | 25 | 7 | 6.36 | ns | 0.75+/-0.07 | ns |
| 2010 | Nine Mile area | 3-Mar  | 25 | 5 | 4.76 | ns | 0.58+/-0.11 | ns |
| 2010 | Nine Mile area | 16-Mar | 25 | 4 | 3.80 | -  | 0.56+/-0.10 | ns |
| 2010 | Nine Mile area | 30-Mar | 24 | 7 | 6.43 | ns | 0.61+/-0.12 | ns |
| 2010 | Tequila Cove   | 1-Feb  | 25 | 3 | 2.80 | -  | 0.55+/-0.05 | ns |
| 2010 | Tequila Cove   | 16-Feb | 25 | 1 | 1.00 | -  | 0           | -  |
| 2010 | Tequila Cove   | 2-Mar  | 25 | 6 | 5.17 | ns | 0.43+/-0.12 | ns |
| 2010 | Tequila Cove   | 16-Mar | 23 | 4 | 3.86 | ns | 0.50+/-0.11 | ns |
| 2010 | Tequila Cove   | 30-Mar | 25 | 7 | 6.17 | ns | 0.71+/-0.07 | ns |
| 2010 | Tequila Cove   | 13-Apr | 25 | 9 | 7.90 | ns | 0.69+/-0.10 | ns |
| 2010 | Wrong Cove     | 10-Mar | 25 | 4 | 3.73 | -  | 0.36+/-0.12 | -  |
| 2010 | Wrong Cove     | 29-Mar | 25 | 6 | 5.53 | ns | 0.58+/-0.11 | ns |
| 2010 | Wrong Cove     | 15-Apr | 29 | 6 | 5.27 | ns | 0.66+/-0.08 | ns |
| 2010 | Yuma Cove      | 1-Feb  | 25 | 5 | 4.40 | ns | 0.42+/-0.12 | -  |
| 2010 | Yuma Cove      | 18-Feb | 25 | 6 | 5.50 | ns | 0.54+/-0.12 | ns |
| 2010 | Yuma Cove      | 1-Mar  | 25 | 5 | 6.96 | ns | 0.48+/-0.12 | ns |
| 2010 | Yuma Cove      | 16-Mar | 25 | 7 | 6.00 | ns | 0.54+/-0.12 | ns |
| 2010 | Yuma Cove      | 29-Mar | 27 | 7 | 6.15 | ns | 0.67+/-0.09 | ns |
| 2011 | Nine Mile area | 31-Jan | 25 | 6 | 5.40 | ns | 0.68+/-0.08 | ns |
| 2011 | Nine Mile area | 24-Feb | 24 | 6 | 5.48 | ns | 0.55+/-0.11 | ns |
| 2011 | Nine Mile area | 1-Mar  | 27 | 7 | 5.84 | ns | 0.51+/-0.12 | ns |
| 2011 | Nine Mile area | 14-Mar | 25 | 6 | 5.36 | ns | 0.53+/-0.11 | ns |
| 2011 | Nine Mile area | 31-Mar | 25 | 8 | 7.33 | ns | 0.78+/-0.07 | ns |

**Supplemental Table 3.** Continued

|      |              |        |    |   |      |    |             |    |
|------|--------------|--------|----|---|------|----|-------------|----|
| 2011 | Tequila Cove | 3-Feb  | 25 | 3 | 3.00 | -  | 0.57+/-0.08 | ns |
| 2011 | Tequila Cove | 15-Feb | 24 | 5 | 4.62 | ns | 0.44+/-0.12 | ns |
| 2011 | Tequila Cove | 1-Mar  | 24 | 7 | 6.00 | ns | 0.45+/-0.13 | ns |
| 2011 | Tequila Cove | 14-Mar | 24 | 7 | 6.31 | ns | 0.65+/-0.10 | ns |
| 2011 | Tequila Cove | 29-Mar | 25 | 5 | 4.73 | ns | 0.61+/-0.10 | ns |
| 2011 | Wrong Cove   | 29-Mar | 25 | 8 | 6.96 | ns | 0.64+/-0.11 | ns |
| 2011 | Wrong Cove   | 14-Apr | 25 | 9 | 7.93 | ns | 0.72+/-0.09 | ns |
| 2011 | Wrong Cove   | 26-Apr | 25 | 7 | 6.19 | ns | 0.63+/-0.10 | ns |
| 2011 | Yuma Cove    | 3-Feb  | 23 | 5 | 4.60 | ns | 0.39+/-0.13 | -  |
| 2011 | Yuma Cove    | 15-Feb | 24 | 7 | 6.16 | ns | 0.55+/-0.12 | ns |
| 2011 | Yuma Cove    | 28-Feb | 26 | 8 | 6.85 | ns | 0.77+/-0.06 | ns |
| 2011 | Yuma Cove    | 15-Mar | 23 | 6 | 5.71 | ns | 0.62+/-0.11 | ns |
| 2011 | Yuma Cove    | 28-Mar | 25 | 8 | 7.10 | ns | 0.64+/-0.11 | ns |
| 2011 | Yuma Cove    | 27-Apr | 25 | 3 | 3.00 | -  | 0.50+/-0.10 | ns |

**Supplemental Table 4.** Microsatellite genotypes for individuals examined in this study. Sample ID provides the lab assigned identification number for each individual.

0 indicates missing data.

| Sample ID | Xte1 | Xte1 | Xte2 | Xte2 | Xte7 | Xte7 | Xte8 | Xte8 | Xte10 | Xte10 | Xte11 | Xte11 | Xte12 | Xte12 | Xte16 | Xte16 |
|-----------|------|------|------|------|------|------|------|------|-------|-------|-------|-------|-------|-------|-------|-------|
| 97rbl.002 | 135  | 137  | 76   | 76   | 140  | 156  | 224  | 224  | 249   | 253   | 298   | 298   | 160   | 194   | 216   | 248   |
| 97rbl.008 | 135  | 137  | 76   | 76   | 144  | 152  | 224  | 230  | 239   | 255   | 298   | 298   | 202   | 202   | 222   | 224   |
| 97rbl.009 | 135  | 135  | 76   | 76   | 144  | 144  | 224  | 238  | 247   | 251   | 292   | 298   | 196   | 198   | 220   | 226   |
| 97rbl.010 | 135  | 137  | 76   | 76   | 144  | 174  | 224  | 230  | 239   | 255   | 300   | 300   | 202   | 202   | 236   | 240   |
| 97rbl.011 | 137  | 137  | 76   | 76   | 144  | 144  | 226  | 230  | 239   | 255   | 322   | 322   | 202   | 202   | 214   | 220   |
| 97rbl.018 | 137  | 137  | 76   | 76   | 144  | 156  | 222  | 260  | 239   | 251   | 298   | 302   | 160   | 200   | 228   | 234   |
| 97rbl.021 | 137  | 137  | 76   | 78   | 144  | 144  | 222  | 224  | 239   | 247   | 322   | 322   | 200   | 202   | 214   | 234   |
| 97rbl.029 | 137  | 137  | 76   | 76   | 144  | 188  | 230  | 240  | 239   | 245   | 296   | 300   | 202   | 202   | 216   | 252   |
| 97rbl.031 | 137  | 137  | 76   | 76   | 144  | 158  | 224  | 230  | 239   | 247   | 298   | 300   | 160   | 200   | 222   | 234   |
| 97rbl.032 | 137  | 137  | 76   | 76   | 144  | 144  | 232  | 240  | 239   | 251   | 296   | 302   | 160   | 200   | 232   | 236   |
| 97rbl.034 | 135  | 137  | 76   | 76   | 144  | 144  | 224  | 230  | 235   | 239   | 294   | 298   | 160   | 196   | 212   | 244   |
| 97rbl.040 | 137  | 137  | 76   | 76   | 144  | 144  | 228  | 248  | 239   | 247   | 294   | 296   | 200   | 202   | 234   | 238   |
| 97rbl.041 | 137  | 137  | 76   | 76   | 144  | 144  | 232  | 248  | 239   | 241   | 292   | 294   | 160   | 202   | 232   | 234   |
| 97rbl.043 | 137  | 137  | 76   | 76   | 156  | 156  | 224  | 226  | 247   | 247   | 296   | 300   | 198   | 202   | 212   | 250   |
| 97rbl.045 | 135  | 137  | 76   | 76   | 144  | 144  | 224  | 232  | 253   | 253   | 288   | 296   | 202   | 202   | 220   | 222   |
| 97rbl.048 | 135  | 137  | 76   | 78   | 144  | 152  | 232  | 236  | 247   | 249   | 304   | 304   | 200   | 200   | 190   | 238   |
| 97rbl.051 | 137  | 137  | 72   | 76   | 156  | 156  | 230  | 236  | 239   | 247   | 294   | 296   | 200   | 202   | 234   | 236   |
| 97rbl.055 | 137  | 137  | 76   | 76   | 140  | 144  | 220  | 230  | 239   | 247   | 286   | 296   | 196   | 200   | 234   | 238   |
| 97rbl.062 | 137  | 137  | 76   | 76   | 162  | 180  | 226  | 230  | 239   | 251   | 296   | 298   | 202   | 204   | 232   | 242   |
| 97rbl.068 | 137  | 137  | 76   | 76   | 144  | 156  | 220  | 246  | 239   | 251   | 294   | 302   | 202   | 210   | 236   | 240   |
| 97rbl.070 | 137  | 137  | 74   | 76   | 144  | 156  | 252  | 252  | 239   | 251   | 292   | 302   | 202   | 204   | 220   | 238   |
| 97rbl.072 | 135  | 137  | 76   | 78   | 144  | 144  | 222  | 224  | 241   | 247   | 292   | 300   | 160   | 202   | 226   | 248   |
| 97rbl.076 | 137  | 137  | 76   | 76   | 144  | 144  | 224  | 240  | 245   | 247   | 292   | 304   | 160   | 200   | 214   | 236   |
| 97rbl.077 | 135  | 137  | 76   | 76   | 160  | 160  | 220  | 222  | 251   | 251   | 294   | 300   | 196   | 202   | 228   | 236   |
| 97rbl.080 | 135  | 137  | 76   | 76   | 144  | 156  | 220  | 230  | 247   | 251   | 294   | 298   | 196   | 200   | 234   | 234   |
| 97rbl.082 | 137  | 137  | 76   | 76   | 144  | 156  | 226  | 234  | 239   | 239   | 302   | 306   | 194   | 200   | 218   | 236   |
| 97rbl.084 | 137  | 137  | 76   | 76   | 144  | 160  | 222  | 224  | 241   | 249   | 296   | 300   | 200   | 204   | 212   | 218   |
| 97rbl.085 | 137  | 137  | 76   | 76   | 156  | 188  | 238  | 256  | 239   | 249   | 300   | 300   | 160   | 196   | 220   | 238   |
| 97rbl.095 | 137  | 137  | 76   | 76   | 156  | 160  | 230  | 240  | 245   | 247   | 296   | 298   | 198   | 198   | 226   | 240   |
| 97rbl.102 | 135  | 137  | 76   | 78   | 144  | 156  | 222  | 240  | 247   | 247   | 296   | 300   | 196   | 200   | 220   | 240   |
| 97rbl.105 | 135  | 137  | 76   | 78   | 144  | 158  | 224  | 224  | 245   | 247   | 294   | 302   | 196   | 200   | 232   | 234   |
| 97rbl.106 | 135  | 137  | 76   | 76   | 144  | 158  | 234  | 238  | 239   | 245   | 296   | 298   | 200   | 204   | 190   | 190   |
| 97rbl.107 | 135  | 135  | 76   | 76   | 144  | 158  | 212  | 230  | 245   | 245   | 300   | 308   | 196   | 200   | 238   | 240   |
| 97rbl.108 | 137  | 137  | 76   | 76   | 154  | 164  | 222  | 232  | 245   | 251   | 300   | 300   | 196   | 196   | 222   | 222   |

|           |     |     |    |    |     |     |     |     |     |     |     |     |     |     |     |     |
|-----------|-----|-----|----|----|-----|-----|-----|-----|-----|-----|-----|-----|-----|-----|-----|-----|
| 97rbl.110 | 137 | 137 | 76 | 76 | 144 | 156 | 224 | 228 | 239 | 241 | 294 | 316 | 160 | 200 | 222 | 226 |
| 97rbl.111 | 137 | 137 | 76 | 78 | 144 | 156 | 230 | 248 | 245 | 247 | 296 | 298 | 198 | 202 | 222 | 248 |
| 97rbl.112 | 137 | 137 | 76 | 76 | 152 | 156 | 226 | 230 | 237 | 249 | 296 | 296 | 200 | 202 | 220 | 220 |
| 97rbl.113 | 137 | 137 | 76 | 76 | 144 | 158 | 222 | 222 | 247 | 247 | 294 | 302 | 194 | 206 | 216 | 238 |
| 97rbl.117 | 135 | 137 | 76 | 76 | 160 | 170 | 220 | 248 | 247 | 249 | 296 | 302 | 200 | 206 | 238 | 240 |
| 97rbl.120 | 137 | 137 | 76 | 76 | 144 | 156 | 232 | 248 | 247 | 247 | 292 | 296 | 194 | 202 | 216 | 238 |
| 97rbl.122 | 137 | 137 | 76 | 76 | 144 | 144 | 224 | 230 | 239 | 247 | 294 | 308 | 196 | 200 | 212 | 238 |
| 97rbl.125 | 135 | 137 | 76 | 76 | 144 | 144 | 220 | 224 | 247 | 247 | 302 | 308 | 200 | 200 | 218 | 238 |
| 97rbl.130 | 135 | 137 | 76 | 76 | 144 | 144 | 226 | 234 | 241 | 245 | 298 | 298 | 196 | 202 | 212 | 220 |
| 97rbl.132 | 137 | 137 | 76 | 78 | 144 | 156 | 232 | 236 | 241 | 251 | 302 | 332 | 200 | 206 | 234 | 238 |
| 97rbl.133 | 135 | 137 | 76 | 76 | 144 | 156 | 230 | 234 | 239 | 241 | 294 | 302 | 160 | 160 | 222 | 226 |
| 97rbl.138 | 135 | 137 | 76 | 76 | 144 | 158 | 224 | 230 | 245 | 251 | 298 | 302 | 200 | 202 | 220 | 238 |
| 97rbl.141 | 135 | 137 | 76 | 76 | 144 | 158 | 242 | 248 | 247 | 247 | 294 | 298 | 194 | 202 | 212 | 222 |
| 97rbl.143 | 137 | 137 | 76 | 76 | 156 | 160 | 224 | 230 | 245 | 245 | 302 | 302 | 196 | 206 | 218 | 236 |
| 97rbl.144 | 137 | 137 | 76 | 76 | 162 | 188 | 224 | 240 | 245 | 249 | 300 | 306 | 200 | 202 | 198 | 234 |
| 97rbl.145 | 137 | 137 | 76 | 78 | 144 | 156 | 214 | 224 | 239 | 239 | 300 | 300 | 200 | 200 | 228 | 240 |
| 97rbl.146 | 137 | 137 | 76 | 76 | 144 | 156 | 224 | 232 | 237 | 245 | 302 | 308 | 192 | 202 | 232 | 238 |
| 97rbl.150 | 137 | 137 | 76 | 76 | 156 | 164 | 226 | 238 | 245 | 249 | 302 | 308 | 200 | 202 | 212 | 232 |
| 97rbl.160 | 137 | 137 | 76 | 76 | 156 | 158 | 226 | 232 | 249 | 253 | 294 | 298 | 200 | 204 | 192 | 194 |
| 97rbl.163 | 137 | 137 | 76 | 76 | 140 | 156 | 232 | 240 | 241 | 249 | 296 | 296 | 200 | 204 | 192 | 238 |
| 97rbl.166 | 137 | 137 | 72 | 76 | 144 | 152 | 224 | 248 | 245 | 245 | 300 | 302 | 198 | 200 | 222 | 250 |
| 97rbl.168 | 137 | 137 | 76 | 78 | 144 | 158 | 224 | 238 | 245 | 249 | 294 | 300 | 198 | 198 | 210 | 224 |
| 97rbl.169 | 137 | 137 | 76 | 76 | 144 | 158 | 230 | 260 | 239 | 241 | 294 | 296 | 160 | 206 | 222 | 252 |
| 97rbl.170 | 135 | 137 | 76 | 76 | 144 | 144 | 224 | 232 | 247 | 249 | 298 | 300 | 196 | 200 | 234 | 244 |
| 97rbl.174 | 135 | 135 | 74 | 78 | 144 | 160 | 226 | 240 | 241 | 245 | 292 | 302 | 202 | 202 | 212 | 242 |
| 97rbl.175 | 137 | 137 | 76 | 76 | 156 | 156 | 230 | 248 | 239 | 249 | 296 | 298 | 200 | 210 | 232 | 236 |
| 97rbl.177 | 135 | 137 | 76 | 76 | 144 | 160 | 224 | 238 | 245 | 245 | 292 | 302 | 200 | 202 | 238 | 242 |
| 97rbl.185 | 135 | 137 | 76 | 76 | 144 | 158 | 230 | 248 | 245 | 247 | 300 | 302 | 196 | 200 | 242 | 258 |
| 97rbl.187 | 135 | 137 | 76 | 78 | 144 | 180 | 240 | 264 | 239 | 251 | 292 | 308 | 198 | 200 | 232 | 240 |
| 97rbl.193 | 135 | 137 | 76 | 76 | 144 | 144 | 222 | 248 | 245 | 251 | 292 | 296 | 200 | 200 | 232 | 240 |
| 97rbl.194 | 137 | 137 | 76 | 76 | 164 | 176 | 212 | 230 | 249 | 251 | 304 | 306 | 198 | 204 | 220 | 226 |
| 97rbl.195 | 137 | 137 | 76 | 76 | 144 | 144 | 222 | 248 | 239 | 241 | 304 | 304 | 202 | 204 | 222 | 250 |
| 97rbl.196 | 137 | 137 | 76 | 76 | 144 | 180 | 230 | 264 | 241 | 253 | 290 | 296 | 198 | 200 | 236 | 238 |
| 97rbl.199 | 137 | 137 | 76 | 76 | 158 | 162 | 224 | 248 | 247 | 255 | 294 | 302 | 202 | 204 | 238 | 246 |
| 97rbl.200 | 137 | 137 | 76 | 76 | 144 | 144 | 222 | 242 | 251 | 251 | 296 | 304 | 196 | 200 | 234 | 256 |
| 97rbl.208 | 137 | 137 | 76 | 76 | 144 | 162 | 222 | 230 | 235 | 239 | 292 | 296 | 196 | 200 | 222 | 230 |
| 97rbl.209 | 137 | 137 | 76 | 76 | 158 | 160 | 224 | 224 | 239 | 247 | 300 | 302 | 202 | 202 | 194 | 194 |

|           |     |     |    |    |     |     |     |     |     |     |     |     |     |     |     |     |
|-----------|-----|-----|----|----|-----|-----|-----|-----|-----|-----|-----|-----|-----|-----|-----|-----|
| 97rbl.211 | 137 | 137 | 76 | 76 | 144 | 180 | 222 | 232 | 239 | 251 | 302 | 304 | 200 | 204 | 226 | 260 |
| 97rbl.213 | 135 | 137 | 76 | 78 | 166 | 180 | 224 | 232 | 245 | 247 | 302 | 304 | 202 | 202 | 240 | 252 |
| 97rbl.215 | 137 | 137 | 76 | 78 | 144 | 156 | 224 | 248 | 247 | 255 | 288 | 294 | 200 | 202 | 226 | 234 |
| 97rbl.216 | 137 | 137 | 76 | 76 | 156 | 156 | 212 | 238 | 241 | 253 | 292 | 296 | 196 | 202 | 218 | 232 |
| 97rbl.221 | 137 | 137 | 76 | 76 | 144 | 156 | 240 | 252 | 245 | 249 | 298 | 300 | 196 | 200 | 232 | 234 |
| 97rbl.224 | 137 | 137 | 76 | 76 | 144 | 146 | 220 | 248 | 249 | 249 | 300 | 302 | 194 | 200 | 192 | 234 |
| 97rbl.226 | 135 | 137 | 76 | 78 | 144 | 158 | 222 | 238 | 239 | 249 | 304 | 304 | 196 | 202 | 240 | 252 |
| 97rbl.228 | 135 | 137 | 76 | 76 | 144 | 156 | 232 | 240 | 239 | 247 | 312 | 312 | 160 | 196 | 228 | 242 |
| 97rbl.232 | 135 | 137 | 76 | 76 | 144 | 158 | 222 | 224 | 241 | 241 | 302 | 306 | 196 | 206 | 230 | 250 |
| 97rbl.235 | 137 | 137 | 76 | 76 | 150 | 156 | 222 | 238 | 235 | 249 | 300 | 306 | 202 | 210 | 240 | 252 |
| 97rbl.237 | 137 | 137 | 76 | 76 | 144 | 144 | 222 | 240 | 245 | 247 | 294 | 296 | 198 | 200 | 226 | 242 |
| 97rbl.238 | 135 | 135 | 76 | 76 | 144 | 152 | 224 | 230 | 241 | 245 | 300 | 308 | 202 | 202 | 234 | 238 |
| 97rbl.239 | 137 | 137 | 76 | 76 | 144 | 154 | 230 | 240 | 245 | 247 | 292 | 300 | 198 | 206 | 192 | 238 |
| 97rbl.241 | 135 | 137 | 76 | 76 | 144 | 144 | 212 | 240 | 237 | 251 | 298 | 304 | 160 | 198 | 242 | 242 |
| 97rbl.243 | 137 | 137 | 76 | 76 | 162 | 162 | 224 | 236 | 251 | 251 | 294 | 294 | 200 | 202 | 222 | 240 |
| 97rbl.246 | 137 | 137 | 76 | 76 | 144 | 144 | 214 | 224 | 239 | 249 | 300 | 300 | 202 | 202 | 216 | 238 |
| 97rbl.251 | 137 | 137 | 76 | 76 | 144 | 144 | 226 | 242 | 235 | 239 | 294 | 302 | 198 | 202 | 222 | 240 |
| 97rbl.252 | 135 | 137 | 76 | 76 | 144 | 156 | 222 | 232 | 239 | 255 | 296 | 300 | 200 | 200 | 214 | 242 |
| 97rbl.255 | 137 | 137 | 76 | 76 | 144 | 156 | 224 | 230 | 247 | 247 | 298 | 300 | 196 | 196 | 238 | 238 |
| 97rbl.260 | 135 | 135 | 76 | 76 | 144 | 156 | 212 | 248 | 253 | 253 | 302 | 304 | 160 | 200 | 220 | 232 |
| 97rbl.269 | 137 | 137 | 76 | 76 | 144 | 156 | 230 | 240 | 249 | 253 | 294 | 296 | 200 | 200 | 238 | 266 |
| 97rbl.272 | 137 | 137 | 76 | 76 | 144 | 156 | 220 | 222 | 249 | 249 | 294 | 302 | 202 | 202 | 226 | 226 |
| 97rbl.280 | 137 | 137 | 72 | 76 | 144 | 144 | 222 | 232 | 235 | 247 | 294 | 298 | 196 | 204 | 234 | 236 |
| 97rbl.283 | 137 | 137 | 76 | 76 | 152 | 156 | 230 | 230 | 245 | 247 | 292 | 294 | 196 | 200 | 220 | 242 |
| 97rbl.289 | 135 | 137 | 76 | 76 | 144 | 152 | 222 | 224 | 249 | 249 | 288 | 292 | 196 | 198 | 238 | 270 |
| 97rbl.294 | 137 | 137 | 76 | 76 | 144 | 156 | 230 | 234 | 245 | 253 | 308 | 318 | 200 | 202 | 234 | 234 |
| 97rbl.295 | 137 | 137 | 76 | 76 | 156 | 164 | 212 | 228 | 251 | 251 | 298 | 300 | 200 | 200 | 232 | 240 |
| 97rbl.297 | 137 | 137 | 76 | 76 | 158 | 158 | 224 | 230 | 235 | 235 | 296 | 300 | 200 | 204 | 220 | 234 |
| 97rbl.303 | 137 | 137 | 76 | 76 | 156 | 166 | 230 | 238 | 247 | 247 | 296 | 298 | 200 | 200 | 226 | 238 |
| 97rbl.305 | 137 | 137 | 76 | 76 | 152 | 156 | 224 | 230 | 247 | 247 | 292 | 300 | 200 | 206 | 220 | 236 |
| 97rbl.308 | 137 | 137 | 76 | 76 | 152 | 158 | 222 | 236 | 245 | 251 | 296 | 300 | 196 | 202 | 192 | 224 |
| 97rbl.312 | 137 | 137 | 74 | 76 | 144 | 164 | 212 | 222 | 239 | 249 | 300 | 300 | 204 | 204 | 216 | 242 |
| 97rbl.318 | 137 | 137 | 76 | 76 | 158 | 158 | 226 | 230 | 239 | 251 | 294 | 302 | 202 | 214 | 212 | 220 |
| 97rbl.324 | 135 | 137 | 76 | 76 | 144 | 144 | 226 | 230 | 245 | 251 | 270 | 300 | 200 | 202 | 220 | 234 |
| 97rbl.328 | 135 | 137 | 76 | 76 | 144 | 156 | 224 | 228 | 239 | 247 | 294 | 306 | 180 | 204 | 220 | 220 |
| 97rbl.331 | 137 | 137 | 76 | 76 | 144 | 162 | 234 | 238 | 239 | 255 | 296 | 298 | 196 | 202 | 192 | 226 |
| 97rbl.333 | 135 | 137 | 76 | 76 | 144 | 190 | 232 | 232 | 235 | 251 | 298 | 300 | 196 | 204 | 220 | 222 |

|           |     |     |    |    |     |     |     |     |     |     |     |     |     |     |     |     |
|-----------|-----|-----|----|----|-----|-----|-----|-----|-----|-----|-----|-----|-----|-----|-----|-----|
| 97rbl.335 | 137 | 137 | 76 | 78 | 152 | 156 | 222 | 230 | 239 | 245 | 302 | 302 | 196 | 204 | 218 | 232 |
| 97rbl.336 | 137 | 137 | 76 | 76 | 144 | 156 | 230 | 236 | 237 | 245 | 300 | 302 | 198 | 202 | 218 | 238 |
| 97rbl.339 | 135 | 137 | 76 | 76 | 158 | 184 | 234 | 252 | 235 | 239 | 296 | 298 | 196 | 202 | 214 | 220 |
| 97rbl.347 | 135 | 137 | 76 | 76 | 144 | 168 | 220 | 236 | 247 | 255 | 296 | 296 | 196 | 212 | 232 | 236 |
| 97rbl.349 | 137 | 137 | 76 | 76 | 144 | 144 | 224 | 230 | 239 | 249 | 294 | 300 | 202 | 204 | 192 | 236 |
| 97rbl.351 | 137 | 137 | 76 | 76 | 144 | 170 | 224 | 236 | 239 | 247 | 298 | 300 | 200 | 204 | 218 | 226 |
| 97rbl.357 | 137 | 137 | 76 | 76 | 144 | 144 | 226 | 240 | 239 | 249 | 304 | 308 | 196 | 200 | 192 | 234 |
| 97rbl.359 | 135 | 137 | 76 | 76 | 152 | 162 | 224 | 238 | 235 | 247 | 294 | 302 | 202 | 202 | 212 | 236 |
| 97rbl.364 | 137 | 137 | 76 | 76 | 144 | 152 | 222 | 230 | 247 | 247 | 300 | 318 | 200 | 200 | 236 | 240 |
| 97rbl.365 | 135 | 137 | 76 | 76 | 144 | 162 | 224 | 232 | 239 | 249 | 288 | 296 | 160 | 200 | 220 | 222 |
| 97rbl.368 | 137 | 137 | 74 | 76 | 156 | 156 | 220 | 222 | 239 | 245 | 296 | 302 | 196 | 200 | 222 | 236 |
| 97rbl.370 | 137 | 137 | 76 | 76 | 144 | 144 | 230 | 232 | 249 | 249 | 296 | 304 | 200 | 200 | 230 | 254 |
| 98rbl.001 | 135 | 137 | 76 | 76 | 152 | 176 | 224 | 230 | 247 | 249 | 298 | 308 | 198 | 202 | 224 | 236 |
| 98rbl.002 | 137 | 137 | 76 | 76 | 144 | 158 | 228 | 230 | 239 | 247 | 298 | 304 | 160 | 204 | 238 | 242 |
| 98rbl.007 | 137 | 137 | 72 | 76 | 144 | 168 | 230 | 246 | 237 | 253 | 296 | 300 | 200 | 200 | 240 | 246 |
| 98rbl.008 | 137 | 137 | 74 | 78 | 144 | 152 | 220 | 224 | 235 | 251 | 302 | 304 | 198 | 200 | 220 | 236 |
| 98rbl.010 | 137 | 137 | 76 | 76 | 156 | 156 | 222 | 234 | 241 | 249 | 296 | 296 | 196 | 200 | 220 | 244 |
| 98rbl.020 | 137 | 137 | 76 | 76 | 156 | 156 | 224 | 228 | 241 | 247 | 296 | 298 | 200 | 202 | 240 | 240 |
| 98rbl.021 | 137 | 137 | 76 | 76 | 152 | 156 | 220 | 230 | 237 | 253 | 300 | 302 | 196 | 200 | 192 | 242 |
| 98rbl.026 | 137 | 137 | 76 | 76 | 144 | 156 | 214 | 224 | 241 | 241 | 302 | 302 | 198 | 202 | 220 | 238 |
| 98rbl.031 | 137 | 137 | 76 | 76 | 144 | 156 | 234 | 236 | 245 | 247 | 298 | 300 | 180 | 202 | 220 | 248 |
| 98rbl.034 | 137 | 137 | 74 | 76 | 144 | 156 | 222 | 230 | 241 | 247 | 294 | 298 | 200 | 202 | 238 | 250 |
| 98rbl.041 | 135 | 137 | 76 | 76 | 144 | 166 | 224 | 236 | 239 | 247 | 298 | 302 | 202 | 202 | 222 | 224 |
| 98rbl.042 | 137 | 137 | 74 | 76 | 144 | 156 | 224 | 244 | 249 | 249 | 294 | 294 | 160 | 202 | 248 | 250 |
| 98rbl.045 | 137 | 137 | 76 | 76 | 156 | 156 | 230 | 236 | 249 | 251 | 298 | 302 | 180 | 200 | 220 | 238 |
| 98rbl.048 | 137 | 137 | 76 | 76 | 156 | 156 | 224 | 236 | 245 | 249 | 298 | 300 | 202 | 204 | 220 | 232 |
| 98rbl.049 | 137 | 137 | 76 | 76 | 144 | 158 | 222 | 224 | 235 | 255 | 300 | 302 | 200 | 202 | 234 | 238 |
| 98rbl.066 | 137 | 137 | 76 | 76 | 144 | 144 | 222 | 230 | 245 | 249 | 298 | 300 | 160 | 196 | 232 | 252 |
| 98rbl.072 | 135 | 137 | 76 | 76 | 144 | 156 | 222 | 238 | 239 | 239 | 294 | 302 | 160 | 200 | 192 | 234 |
| 98rbl.073 | 137 | 137 | 76 | 76 | 144 | 158 | 224 | 240 | 251 | 255 | 300 | 306 | 196 | 202 | 218 | 242 |
| 98rbl.082 | 137 | 137 | 76 | 76 | 144 | 144 | 224 | 226 | 241 | 249 | 302 | 304 | 200 | 200 | 214 | 218 |
| 98rbl.086 | 137 | 137 | 76 | 76 | 156 | 160 | 224 | 242 | 245 | 245 | 296 | 302 | 200 | 204 | 220 | 238 |
| 98rbl.088 | 137 | 137 | 76 | 76 | 144 | 144 | 224 | 244 | 239 | 247 | 296 | 306 | 196 | 202 | 226 | 234 |
| 98rbl.090 | 137 | 137 | 76 | 76 | 144 | 144 | 224 | 236 | 247 | 247 | 300 | 302 | 200 | 202 | 220 | 240 |
| 98rbl.098 | 137 | 137 | 76 | 76 | 144 | 164 | 224 | 226 | 239 | 247 | 302 | 304 | 180 | 200 | 222 | 240 |
| 98rbl.100 | 137 | 137 | 76 | 76 | 144 | 144 | 224 | 224 | 235 | 251 | 292 | 300 | 202 | 202 | 240 | 242 |
| 98rbl.102 | 135 | 137 | 76 | 76 | 156 | 164 | 212 | 230 | 247 | 247 | 300 | 300 | 160 | 204 | 232 | 234 |

|           |     |     |    |    |     |     |     |     |     |     |     |     |     |     |     |     |
|-----------|-----|-----|----|----|-----|-----|-----|-----|-----|-----|-----|-----|-----|-----|-----|-----|
| 98rbl.104 | 137 | 137 | 76 | 76 | 156 | 166 | 220 | 224 | 235 | 245 | 296 | 298 | 160 | 200 | 234 | 236 |
| 98rbl.114 | 137 | 137 | 76 | 76 | 144 | 144 | 212 | 230 | 247 | 251 | 298 | 300 | 160 | 200 | 220 | 240 |
| 98rbl.120 | 137 | 137 | 76 | 76 | 144 | 162 | 224 | 230 | 239 | 249 | 298 | 304 | 202 | 202 | 220 | 238 |
| 98rbl.122 | 137 | 137 | 76 | 76 | 144 | 156 | 224 | 224 | 235 | 247 | 298 | 302 | 196 | 202 | 238 | 240 |
| 98rbl.127 | 137 | 137 | 76 | 76 | 156 | 180 | 224 | 228 | 245 | 249 | 298 | 302 | 200 | 200 | 226 | 236 |
| 98rbl.128 | 137 | 137 | 76 | 76 | 158 | 180 | 224 | 230 | 239 | 253 | 296 | 298 | 200 | 202 | 226 | 236 |
| 98rbl.131 | 137 | 137 | 76 | 76 | 144 | 144 | 224 | 224 | 247 | 247 | 296 | 302 | 202 | 206 | 238 | 240 |
| 98rbl.137 | 137 | 137 | 76 | 76 | 144 | 144 | 240 | 242 | 241 | 249 | 296 | 300 | 196 | 202 | 236 | 238 |
| 98rbl.140 | 137 | 137 | 76 | 76 | 144 | 144 | 220 | 264 | 247 | 255 | 298 | 300 | 202 | 206 | 234 | 234 |
| 98rbl.150 | 137 | 137 | 76 | 76 | 144 | 144 | 226 | 234 | 245 | 247 | 296 | 296 | 196 | 198 | 222 | 238 |
| 98rbl.151 | 135 | 135 | 76 | 78 | 144 | 152 | 212 | 224 | 237 | 249 | 302 | 302 | 180 | 200 | 220 | 234 |
| 98rbl.153 | 137 | 137 | 76 | 76 | 144 | 156 | 232 | 242 | 247 | 249 | 294 | 298 | 198 | 200 | 218 | 240 |
| 98rbl.156 | 137 | 137 | 76 | 76 | 144 | 156 | 230 | 260 | 239 | 239 | 292 | 304 | 200 | 202 | 192 | 234 |
| 98rbl.158 | 137 | 137 | 72 | 76 | 144 | 156 | 222 | 230 | 245 | 245 | 292 | 302 | 192 | 206 | 236 | 238 |
| 98rbl.160 | 137 | 137 | 76 | 76 | 144 | 156 | 230 | 260 | 239 | 239 | 294 | 304 | 200 | 202 | 220 | 234 |
| 98rbl.164 | 137 | 137 | 76 | 76 | 144 | 156 | 228 | 260 | 247 | 251 | 294 | 298 | 198 | 200 | 234 | 234 |
| 98rbl.165 | 135 | 137 | 76 | 76 | 152 | 158 | 212 | 228 | 237 | 247 | 296 | 302 | 200 | 204 | 222 | 242 |
| 98rbl.169 | 135 | 137 | 76 | 76 | 144 | 144 | 228 | 240 | 245 | 247 | 292 | 300 | 200 | 200 | 236 | 256 |
| 98rbl.173 | 135 | 137 | 76 | 76 | 144 | 144 | 224 | 238 | 247 | 247 | 296 | 300 | 200 | 200 | 234 | 242 |
| 98rbl.175 | 135 | 137 | 76 | 76 | 144 | 144 | 224 | 230 | 245 | 249 | 294 | 304 | 200 | 210 | 230 | 240 |
| 98rbl.183 | 137 | 137 | 76 | 76 | 144 | 152 | 234 | 242 | 247 | 249 | 302 | 310 | 196 | 202 | 240 | 240 |
| 98rbl.188 | 137 | 137 | 76 | 76 | 156 | 156 | 224 | 224 | 235 | 245 | 296 | 296 | 206 | 208 | 230 | 252 |
| 98rbl.190 | 137 | 137 | 76 | 76 | 156 | 188 | 226 | 232 | 245 | 247 | 300 | 314 | 196 | 202 | 194 | 232 |
| 98rbl.194 | 135 | 137 | 74 | 76 | 156 | 184 | 228 | 230 | 247 | 247 | 298 | 302 | 196 | 198 | 218 | 220 |
| 98rbl.196 | 137 | 137 | 76 | 76 | 144 | 188 | 232 | 242 | 247 | 247 | 296 | 300 | 200 | 202 | 232 | 236 |
| 98rbl.197 | 137 | 137 | 76 | 76 | 156 | 162 | 230 | 248 | 239 | 251 | 300 | 308 | 198 | 202 | 234 | 242 |
| 98rbl.205 | 137 | 137 | 76 | 76 | 144 | 184 | 230 | 232 | 247 | 249 | 302 | 302 | 198 | 202 | 218 | 220 |
| 98rbl.207 | 135 | 137 | 76 | 76 | 144 | 156 | 236 | 244 | 235 | 239 | 298 | 306 | 200 | 200 | 234 | 254 |
| 98rbl.215 | 137 | 137 | 76 | 76 | 144 | 144 | 220 | 224 | 247 | 247 | 292 | 300 | 198 | 202 | 222 | 236 |
| 98rbl.218 | 137 | 137 | 76 | 78 | 144 | 152 | 230 | 240 | 237 | 245 | 296 | 302 | 200 | 202 | 240 | 242 |
| 98rbl.219 | 135 | 137 | 76 | 76 | 144 | 174 | 222 | 248 | 247 | 251 | 270 | 298 | 208 | 208 | 232 | 254 |
| 98rbl.221 | 137 | 137 | 76 | 76 | 150 | 158 | 230 | 242 | 251 | 251 | 296 | 306 | 196 | 200 | 224 | 236 |
| 98rbl.224 | 135 | 137 | 76 | 76 | 144 | 174 | 228 | 256 | 239 | 239 | 294 | 310 | 160 | 196 | 236 | 236 |
| 98rbl.228 | 137 | 137 | 76 | 78 | 156 | 156 | 224 | 224 | 239 | 239 | 294 | 300 | 200 | 202 | 234 | 240 |
| 98rbl.233 | 135 | 137 | 76 | 76 | 158 | 162 | 222 | 226 | 249 | 255 | 298 | 302 | 200 | 202 | 236 | 240 |
| 98rbl.235 | 137 | 137 | 76 | 76 | 156 | 158 | 230 | 236 | 253 | 253 | 296 | 310 | 202 | 204 | 236 | 236 |
| 98rbl.244 | 137 | 137 | 76 | 76 | 144 | 144 | 232 | 264 | 247 | 255 | 300 | 304 | 198 | 198 | 218 | 220 |

|           |     |     |    |    |     |     |     |     |     |     |     |     |     |     |     |     |
|-----------|-----|-----|----|----|-----|-----|-----|-----|-----|-----|-----|-----|-----|-----|-----|-----|
| 98rbl.245 | 137 | 137 | 76 | 76 | 144 | 144 | 224 | 226 | 239 | 251 | 296 | 298 | 196 | 202 | 220 | 240 |
| 98rbl.249 | 137 | 137 | 76 | 76 | 144 | 144 | 232 | 238 | 241 | 247 | 296 | 300 | 196 | 202 | 220 | 254 |
| 98rbl.252 | 135 | 137 | 76 | 76 | 144 | 156 | 222 | 230 | 235 | 235 | 294 | 302 | 196 | 200 | 234 | 236 |
| 98rbl.254 | 137 | 137 | 76 | 78 | 144 | 144 | 230 | 230 | 239 | 249 | 300 | 324 | 200 | 202 | 238 | 252 |
| 98rbl.261 | 137 | 137 | 76 | 76 | 156 | 156 | 230 | 230 | 245 | 251 | 294 | 300 | 200 | 200 | 234 | 236 |
| 98rbl.267 | 137 | 137 | 76 | 76 | 150 | 158 | 224 | 230 | 239 | 247 | 300 | 302 | 202 | 202 | 220 | 254 |
| 98rbl.271 | 137 | 137 | 76 | 76 | 152 | 152 | 228 | 248 | 251 | 251 | 298 | 310 | 180 | 200 | 238 | 238 |
| 98rbl.274 | 137 | 137 | 76 | 76 | 144 | 144 | 224 | 232 | 239 | 239 | 298 | 308 | 198 | 200 | 212 | 220 |
| 98rbl.276 | 137 | 137 | 72 | 76 | 144 | 144 | 224 | 226 | 237 | 241 | 300 | 308 | 200 | 200 | 214 | 214 |
| 98rbl.282 | 135 | 137 | 76 | 76 | 158 | 158 | 214 | 224 | 249 | 249 | 302 | 308 | 200 | 200 | 224 | 224 |
| 98rbl.286 | 135 | 137 | 76 | 76 | 144 | 144 | 230 | 232 | 239 | 253 | 298 | 302 | 160 | 210 | 224 | 236 |
| 98rbl.289 | 137 | 137 | 76 | 78 | 158 | 176 | 228 | 238 | 245 | 249 | 300 | 310 | 204 | 206 | 220 | 254 |
| 98rbl.293 | 137 | 137 | 76 | 78 | 156 | 176 | 230 | 230 | 235 | 235 | 304 | 310 | 200 | 206 | 220 | 242 |
| 98rbl.298 | 137 | 137 | 76 | 76 | 152 | 176 | 244 | 248 | 247 | 247 | 300 | 302 | 202 | 202 | 194 | 234 |
| 98rbl.302 | 137 | 137 | 76 | 76 | 144 | 144 | 224 | 230 | 0   | 0   | 298 | 310 | 180 | 200 | 214 | 234 |
| 98rbl.309 | 137 | 137 | 76 | 76 | 144 | 182 | 224 | 228 | 241 | 245 | 298 | 308 | 198 | 200 | 216 | 238 |
| 98rbl.310 | 137 | 137 | 76 | 76 | 144 | 146 | 228 | 230 | 241 | 251 | 302 | 304 | 200 | 200 | 234 | 238 |
| 98rbl.311 | 137 | 137 | 76 | 76 | 144 | 144 | 230 | 230 | 249 | 249 | 302 | 310 | 200 | 200 | 214 | 234 |
| 98rbl.323 | 137 | 137 | 76 | 76 | 156 | 156 | 232 | 232 | 247 | 251 | 298 | 310 | 160 | 198 | 212 | 242 |
| 98rbl.326 | 137 | 137 | 76 | 78 | 144 | 144 | 234 | 238 | 247 | 251 | 296 | 302 | 196 | 196 | 218 | 234 |
| 98rbl.327 | 137 | 137 | 76 | 76 | 156 | 188 | 222 | 230 | 235 | 237 | 294 | 300 | 202 | 202 | 220 | 226 |
| 98rbl.335 | 137 | 137 | 76 | 76 | 144 | 144 | 224 | 230 | 247 | 247 | 292 | 304 | 200 | 202 | 238 | 262 |
| 98rbl.342 | 135 | 137 | 76 | 76 | 144 | 156 | 222 | 240 | 241 | 247 | 294 | 296 | 200 | 202 | 192 | 226 |
| 98rbl.346 | 137 | 137 | 76 | 76 | 144 | 150 | 222 | 242 | 245 | 249 | 298 | 298 | 200 | 202 | 220 | 228 |
| 98rbl.357 | 137 | 137 | 76 | 76 | 144 | 168 | 242 | 248 | 241 | 247 | 298 | 302 | 200 | 200 | 238 | 268 |
| 98rbl.361 | 137 | 137 | 76 | 76 | 144 | 144 | 230 | 248 | 247 | 247 | 292 | 300 | 200 | 200 | 218 | 250 |
| 98rbl.363 | 137 | 137 | 76 | 76 | 144 | 144 | 220 | 230 | 245 | 249 | 298 | 302 | 202 | 202 | 212 | 220 |
| 98rbl.369 | 137 | 137 | 76 | 76 | 144 | 188 | 230 | 240 | 245 | 247 | 296 | 302 | 196 | 200 | 220 | 238 |
| 98rbl.372 | 137 | 137 | 76 | 76 | 144 | 162 | 222 | 242 | 247 | 249 | 298 | 300 | 198 | 202 | 236 | 236 |
| 98rbl.374 | 137 | 137 | 76 | 76 | 144 | 166 | 220 | 242 | 247 | 251 | 296 | 302 | 200 | 200 | 238 | 268 |
| 98rbl.375 | 137 | 137 | 72 | 76 | 162 | 162 | 222 | 230 | 235 | 235 | 298 | 300 | 160 | 204 | 232 | 234 |
| 98rbl.380 | 137 | 137 | 76 | 76 | 144 | 156 | 222 | 224 | 237 | 247 | 296 | 304 | 196 | 204 | 214 | 230 |
| 98rbl.388 | 137 | 137 | 76 | 76 | 144 | 158 | 226 | 240 | 247 | 249 | 286 | 300 | 196 | 200 | 236 | 236 |
| 98rbl.391 | 135 | 135 | 76 | 76 | 156 | 192 | 220 | 220 | 251 | 255 | 294 | 310 | 196 | 200 | 222 | 228 |
| 98rbl.392 | 137 | 137 | 76 | 76 | 152 | 152 | 220 | 228 | 245 | 247 | 298 | 300 | 202 | 202 | 232 | 254 |
| 98rbl.393 | 137 | 137 | 76 | 76 | 144 | 158 | 212 | 222 | 239 | 249 | 286 | 302 | 196 | 196 | 232 | 242 |
| 98rbl.395 | 137 | 137 | 76 | 76 | 144 | 144 | 224 | 240 | 235 | 251 | 302 | 304 | 194 | 202 | 220 | 238 |



|           |     |     |    |    |     |     |     |     |     |     |     |     |     |     |     |     |
|-----------|-----|-----|----|----|-----|-----|-----|-----|-----|-----|-----|-----|-----|-----|-----|-----|
| 98rbl.396 | 137 | 137 | 76 | 76 | 144 | 176 | 222 | 248 | 235 | 247 | 296 | 302 | 196 | 206 | 212 | 220 |
| 98rbl.397 | 137 | 137 | 76 | 76 | 156 | 198 | 230 | 232 | 249 | 251 | 298 | 302 | 200 | 200 | 250 | 250 |
| 98rbl.400 | 137 | 137 | 76 | 76 | 154 | 156 | 238 | 264 | 235 | 251 | 302 | 304 | 194 | 202 | 238 | 244 |
| 98rbl.402 | 137 | 137 | 76 | 78 | 144 | 144 | 234 | 244 | 245 | 245 | 298 | 302 | 160 | 206 | 220 | 242 |
| 98rbl.403 | 137 | 137 | 76 | 76 | 152 | 152 | 214 | 238 | 239 | 247 | 302 | 306 | 196 | 200 | 218 | 232 |
| 98rbl.408 | 137 | 137 | 76 | 76 | 144 | 156 | 238 | 248 | 235 | 245 | 294 | 300 | 196 | 202 | 220 | 226 |
| 98rbl.410 | 135 | 137 | 76 | 76 | 156 | 156 | 222 | 228 | 237 | 245 | 294 | 298 | 196 | 202 | 216 | 240 |
| 98rbl.417 | 137 | 137 | 76 | 76 | 144 | 144 | 220 | 228 | 247 | 247 | 302 | 326 | 200 | 202 | 230 | 252 |
| 98rbl.420 | 137 | 137 | 76 | 76 | 158 | 160 | 230 | 242 | 247 | 251 | 300 | 308 | 196 | 208 | 232 | 236 |
| 98rbl.428 | 137 | 137 | 76 | 76 | 156 | 180 | 234 | 248 | 235 | 239 | 300 | 308 | 200 | 202 | 220 | 244 |
| 98rbl.431 | 137 | 137 | 74 | 76 | 144 | 152 | 220 | 248 | 249 | 249 | 292 | 302 | 200 | 202 | 244 | 244 |
| 98rbl.434 | 137 | 137 | 76 | 76 | 144 | 144 | 222 | 234 | 247 | 249 | 300 | 300 | 196 | 202 | 234 | 250 |
| 98rbl.437 | 135 | 137 | 76 | 76 | 144 | 156 | 222 | 230 | 247 | 247 | 294 | 296 | 202 | 204 | 212 | 244 |
| 98rbl.439 | 137 | 137 | 76 | 76 | 144 | 170 | 230 | 260 | 237 | 255 | 298 | 306 | 200 | 210 | 192 | 238 |
| 98rbl.440 | 135 | 137 | 76 | 76 | 144 | 144 | 222 | 238 | 235 | 247 | 300 | 306 | 200 | 200 | 226 | 242 |
| 98rbl.456 | 137 | 137 | 76 | 76 | 144 | 156 | 228 | 230 | 235 | 249 | 296 | 300 | 160 | 202 | 228 | 236 |
| 98rbl.458 | 135 | 137 | 76 | 76 | 144 | 156 | 230 | 230 | 247 | 247 | 306 | 306 | 202 | 210 | 212 | 222 |
| 98rbl.464 | 135 | 137 | 76 | 78 | 158 | 162 | 230 | 248 | 239 | 255 | 296 | 302 | 200 | 202 | 192 | 240 |
| 98rbl.474 | 135 | 137 | 76 | 76 | 144 | 144 | 224 | 224 | 247 | 249 | 298 | 306 | 200 | 202 | 222 | 242 |
| 98rbl.477 | 135 | 135 | 76 | 76 | 156 | 158 | 224 | 230 | 235 | 245 | 300 | 302 | 160 | 196 | 244 | 244 |
| 98rbl.488 | 135 | 137 | 76 | 76 | 144 | 170 | 232 | 242 | 237 | 251 | 288 | 296 | 200 | 210 | 236 | 240 |
| 99rbl.005 | 137 | 137 | 76 | 78 | 152 | 156 | 220 | 230 | 237 | 247 | 300 | 302 | 196 | 206 | 218 | 222 |
| 99rbl.007 | 137 | 137 | 76 | 76 | 144 | 156 | 222 | 224 | 247 | 251 | 292 | 298 | 196 | 202 | 234 | 236 |
| 99rbl.008 | 137 | 137 | 76 | 76 | 144 | 156 | 224 | 234 | 247 | 247 | 296 | 300 | 160 | 200 | 218 | 230 |
| 99rbl.012 | 137 | 137 | 76 | 76 | 144 | 170 | 222 | 230 | 245 | 249 | 298 | 318 | 196 | 198 | 220 | 244 |
| 99rbl.019 | 137 | 137 | 76 | 76 | 144 | 144 | 236 | 240 | 247 | 255 | 292 | 294 | 196 | 200 | 192 | 222 |
| 99rbl.023 | 137 | 137 | 76 | 76 | 144 | 194 | 220 | 240 | 245 | 249 | 298 | 298 | 200 | 200 | 192 | 236 |
| 99rbl.025 | 137 | 137 | 76 | 76 | 140 | 156 | 222 | 224 | 237 | 249 | 296 | 296 | 178 | 202 | 192 | 228 |
| 99rbl.026 | 135 | 137 | 76 | 76 | 144 | 188 | 222 | 230 | 237 | 245 | 294 | 302 | 200 | 202 | 234 | 234 |
| 99rbl.027 | 137 | 137 | 76 | 78 | 144 | 172 | 220 | 248 | 241 | 241 | 296 | 302 | 202 | 204 | 212 | 218 |
| 99rbl.029 | 135 | 137 | 76 | 76 | 144 | 144 | 242 | 248 | 237 | 239 | 296 | 304 | 202 | 204 | 216 | 252 |
| 99rbl.031 | 135 | 137 | 76 | 76 | 144 | 160 | 228 | 230 | 235 | 241 | 294 | 304 | 196 | 202 | 220 | 236 |
| 99rbl.034 | 137 | 137 | 76 | 76 | 144 | 180 | 224 | 230 | 245 | 245 | 296 | 302 | 200 | 204 | 224 | 232 |
| 99rbl.036 | 137 | 137 | 76 | 78 | 144 | 144 | 222 | 238 | 249 | 251 | 290 | 302 | 200 | 202 | 218 | 232 |
| 99rbl.037 | 137 | 137 | 76 | 76 | 144 | 144 | 234 | 264 | 245 | 245 | 304 | 306 | 200 | 200 | 232 | 248 |
| 99rbl.041 | 137 | 137 | 76 | 76 | 156 | 162 | 230 | 240 | 245 | 249 | 292 | 302 | 200 | 202 | 236 | 240 |
| 99rbl.044 | 137 | 137 | 76 | 76 | 144 | 156 | 224 | 230 | 249 | 249 | 292 | 296 | 200 | 202 | 220 | 236 |

|           |     |     |    |    |     |     |     |     |     |     |     |     |     |     |     |     |
|-----------|-----|-----|----|----|-----|-----|-----|-----|-----|-----|-----|-----|-----|-----|-----|-----|
| 99rbl.046 | 137 | 137 | 76 | 78 | 152 | 156 | 222 | 222 | 245 | 249 | 298 | 302 | 200 | 204 | 220 | 232 |
| 99rbl.050 | 135 | 137 | 76 | 76 | 144 | 156 | 222 | 242 | 235 | 247 | 296 | 302 | 196 | 200 | 222 | 226 |
| 99rbl.051 | 137 | 137 | 76 | 76 | 144 | 156 | 222 | 238 | 245 | 249 | 294 | 296 | 200 | 204 | 198 | 254 |
| 99rbl.053 | 137 | 137 | 76 | 76 | 144 | 152 | 238 | 264 | 245 | 245 | 290 | 300 | 200 | 202 | 220 | 248 |
| 99rbl.054 | 137 | 137 | 76 | 78 | 144 | 156 | 222 | 234 | 249 | 249 | 298 | 302 | 200 | 204 | 218 | 220 |
| 99rbl.058 | 135 | 137 | 76 | 76 | 184 | 184 | 222 | 228 | 241 | 255 | 296 | 304 | 196 | 196 | 218 | 244 |
| 99rbl.060 | 135 | 137 | 76 | 76 | 152 | 156 | 224 | 236 | 245 | 245 | 300 | 306 | 196 | 204 | 218 | 240 |
| 99rbl.063 | 135 | 137 | 76 | 76 | 144 | 156 | 228 | 246 | 241 | 245 | 298 | 334 | 204 | 206 | 230 | 250 |
| 99rbl.066 | 135 | 137 | 76 | 76 | 156 | 164 | 230 | 246 | 247 | 253 | 302 | 320 | 202 | 204 | 234 | 248 |
| 99rbl.067 | 137 | 137 | 76 | 76 | 156 | 166 | 224 | 238 | 245 | 249 | 300 | 334 | 200 | 206 | 226 | 230 |
| 99rbl.068 | 137 | 137 | 76 | 76 | 144 | 158 | 224 | 226 | 237 | 247 | 294 | 310 | 160 | 202 | 226 | 234 |
| 99rbl.069 | 137 | 137 | 76 | 76 | 144 | 156 | 230 | 242 | 247 | 249 | 298 | 304 | 202 | 210 | 234 | 236 |
| 99rbl.072 | 135 | 137 | 76 | 76 | 144 | 156 | 222 | 238 | 239 | 249 | 294 | 298 | 202 | 202 | 226 | 230 |
| 99rbl.075 | 137 | 137 | 76 | 76 | 144 | 156 | 222 | 224 | 237 | 239 | 292 | 300 | 196 | 196 | 230 | 236 |
| 99rbl.076 | 137 | 137 | 76 | 76 | 144 | 188 | 222 | 230 | 235 | 251 | 298 | 302 | 198 | 214 | 234 | 252 |
| 99rbl.077 | 135 | 137 | 76 | 76 | 144 | 180 | 230 | 230 | 235 | 247 | 296 | 300 | 200 | 200 | 220 | 234 |
| 99rbl.078 | 135 | 137 | 76 | 76 | 144 | 180 | 226 | 230 | 245 | 247 | 292 | 306 | 196 | 202 | 234 | 254 |
| 99rbl.079 | 137 | 137 | 76 | 76 | 144 | 144 | 224 | 234 | 245 | 247 | 300 | 318 | 202 | 202 | 236 | 252 |
| 99rbl.083 | 135 | 137 | 76 | 76 | 144 | 158 | 230 | 240 | 237 | 249 | 300 | 302 | 160 | 160 | 220 | 236 |
| 99rbl.084 | 137 | 137 | 76 | 76 | 144 | 160 | 232 | 238 | 249 | 249 | 294 | 308 | 200 | 200 | 220 | 250 |
| 99rbl.088 | 135 | 137 | 76 | 76 | 144 | 158 | 226 | 230 | 239 | 245 | 296 | 298 | 202 | 208 | 220 | 228 |
| 99rbl.089 | 135 | 137 | 76 | 76 | 144 | 158 | 212 | 240 | 249 | 249 | 298 | 302 | 198 | 206 | 194 | 236 |
| 99rbl.090 | 135 | 137 | 76 | 76 | 144 | 144 | 222 | 224 | 239 | 251 | 296 | 302 | 198 | 200 | 218 | 242 |
| 99rbl.092 | 137 | 137 | 76 | 76 | 156 | 156 | 224 | 252 | 235 | 241 | 296 | 310 | 202 | 208 | 212 | 236 |
| 99rbl.098 | 137 | 137 | 76 | 76 | 144 | 164 | 220 | 248 | 239 | 245 | 296 | 308 | 196 | 208 | 228 | 236 |
| 99rbl.099 | 135 | 137 | 76 | 78 | 144 | 180 | 222 | 240 | 237 | 239 | 302 | 302 | 202 | 206 | 194 | 258 |
| 99rbl.104 | 135 | 137 | 76 | 76 | 144 | 144 | 224 | 230 | 239 | 249 | 300 | 300 | 160 | 202 | 192 | 220 |
| 99rbl.111 | 137 | 137 | 76 | 76 | 144 | 156 | 232 | 238 | 239 | 249 | 304 | 304 | 198 | 202 | 232 | 250 |
| 99rbl.112 | 137 | 137 | 76 | 76 | 156 | 156 | 222 | 232 | 239 | 249 | 298 | 306 | 200 | 202 | 220 | 220 |
| 99rbl.115 | 135 | 135 | 76 | 76 | 152 | 156 | 230 | 240 | 237 | 245 | 300 | 304 | 160 | 200 | 220 | 238 |
| 99rbl.119 | 135 | 137 | 76 | 76 | 144 | 144 | 222 | 224 | 241 | 241 | 296 | 296 | 196 | 200 | 220 | 228 |
| 99rbl.120 | 137 | 137 | 76 | 76 | 144 | 152 | 230 | 240 | 239 | 251 | 300 | 304 | 200 | 206 | 220 | 236 |
| 99rbl.123 | 137 | 137 | 76 | 76 | 144 | 144 | 224 | 224 | 239 | 251 | 300 | 308 | 202 | 202 | 214 | 236 |
| 99rbl.126 | 137 | 137 | 76 | 76 | 144 | 152 | 228 | 240 | 247 | 251 | 294 | 296 | 198 | 200 | 212 | 230 |
| 99rbl.127 | 137 | 137 | 76 | 76 | 144 | 152 | 222 | 224 | 245 | 249 | 290 | 302 | 202 | 202 | 198 | 220 |
| 99rbl.128 | 137 | 137 | 76 | 76 | 144 | 144 | 222 | 246 | 245 | 255 | 298 | 300 | 196 | 202 | 230 | 240 |
| 99rbl.129 | 137 | 137 | 76 | 76 | 144 | 144 | 224 | 224 | 237 | 245 | 304 | 304 | 196 | 196 | 220 | 226 |

|           |     |     |    |    |     |     |     |     |     |     |     |     |     |     |     |     |
|-----------|-----|-----|----|----|-----|-----|-----|-----|-----|-----|-----|-----|-----|-----|-----|-----|
| 99rbl.130 | 137 | 137 | 76 | 76 | 144 | 152 | 222 | 228 | 245 | 249 | 300 | 304 | 202 | 206 | 198 | 220 |
| 99rbl.131 | 135 | 137 | 76 | 76 | 144 | 144 | 224 | 226 | 249 | 249 | 296 | 296 | 202 | 202 | 232 | 236 |
| 99rbl.133 | 137 | 137 | 72 | 76 | 152 | 158 | 224 | 232 | 247 | 251 | 296 | 298 | 202 | 202 | 220 | 226 |
| 99rbl.135 | 137 | 137 | 76 | 76 | 144 | 182 | 222 | 238 | 245 | 249 | 298 | 300 | 204 | 212 | 230 | 244 |
| 99rbl.136 | 137 | 137 | 76 | 76 | 144 | 144 | 226 | 232 | 241 | 247 | 302 | 326 | 202 | 206 | 232 | 244 |
| 99rbl.137 | 135 | 137 | 76 | 76 | 144 | 156 | 214 | 230 | 251 | 251 | 300 | 310 | 198 | 202 | 236 | 242 |
| 99rbl.138 | 137 | 137 | 76 | 76 | 144 | 156 | 220 | 222 | 251 | 251 | 298 | 304 | 194 | 204 | 238 | 242 |
| 99rbl.140 | 137 | 137 | 76 | 78 | 144 | 158 | 222 | 224 | 249 | 255 | 300 | 304 | 202 | 204 | 220 | 236 |
| 99rbl.147 | 135 | 137 | 76 | 76 | 144 | 156 | 222 | 232 | 239 | 239 | 298 | 304 | 204 | 206 | 232 | 248 |
| 99rbl.149 | 137 | 137 | 76 | 76 | 156 | 156 | 230 | 244 | 237 | 241 | 300 | 300 | 202 | 206 | 230 | 238 |
| 99rbl.150 | 137 | 137 | 76 | 76 | 144 | 144 | 230 | 236 | 235 | 247 | 306 | 306 | 202 | 202 | 234 | 238 |
| 99rbl.156 | 135 | 137 | 76 | 76 | 144 | 144 | 226 | 230 | 245 | 245 | 298 | 302 | 180 | 202 | 226 | 238 |
| 99rbl.157 | 137 | 137 | 76 | 78 | 144 | 188 | 230 | 242 | 235 | 249 | 300 | 308 | 196 | 200 | 218 | 234 |
| 99rbl.158 | 135 | 137 | 76 | 78 | 144 | 176 | 224 | 240 | 241 | 245 | 294 | 298 | 200 | 200 | 236 | 238 |
| 99rbl.164 | 135 | 137 | 76 | 76 | 144 | 168 | 220 | 222 | 239 | 245 | 300 | 302 | 202 | 212 | 220 | 230 |
| 99rbl.166 | 135 | 137 | 76 | 76 | 144 | 150 | 222 | 230 | 247 | 249 | 296 | 302 | 202 | 206 | 220 | 234 |
| 99rbl.167 | 137 | 137 | 76 | 76 | 144 | 156 | 222 | 230 | 247 | 249 | 298 | 300 | 202 | 204 | 212 | 244 |
| 99rbl.168 | 137 | 137 | 76 | 78 | 156 | 180 | 222 | 242 | 245 | 247 | 302 | 312 | 202 | 204 | 222 | 238 |
| 99rbl.170 | 137 | 137 | 76 | 76 | 144 | 156 | 232 | 232 | 245 | 249 | 294 | 308 | 202 | 204 | 234 | 236 |
| 99rbl.172 | 137 | 137 | 74 | 76 | 156 | 156 | 230 | 230 | 245 | 251 | 298 | 300 | 202 | 206 | 216 | 234 |
| 99rbl.174 | 137 | 137 | 76 | 76 | 152 | 156 | 232 | 246 | 239 | 241 | 296 | 298 | 196 | 204 | 236 | 236 |
| 99rbl.177 | 137 | 137 | 76 | 76 | 144 | 156 | 226 | 226 | 245 | 247 | 304 | 308 | 204 | 204 | 230 | 236 |
| 99rbl.180 | 137 | 137 | 76 | 76 | 144 | 156 | 222 | 222 | 247 | 247 | 294 | 302 | 160 | 202 | 234 | 240 |
| 99rbl.182 | 137 | 137 | 76 | 76 | 156 | 156 | 222 | 244 | 237 | 241 | 300 | 304 | 200 | 204 | 234 | 236 |
| 99rbl.190 | 135 | 137 | 76 | 76 | 144 | 158 | 226 | 234 | 249 | 251 | 294 | 310 | 200 | 202 | 220 | 252 |
| 99rbl.191 | 137 | 137 | 76 | 76 | 144 | 144 | 226 | 232 | 239 | 253 | 284 | 302 | 196 | 202 | 238 | 248 |
| 99rbl.194 | 135 | 137 | 76 | 76 | 156 | 158 | 232 | 236 | 245 | 245 | 298 | 302 | 200 | 202 | 218 | 236 |
| 99rbl.195 | 135 | 137 | 76 | 76 | 144 | 156 | 222 | 224 | 239 | 239 | 292 | 302 | 196 | 202 | 192 | 222 |
| 99rbl.196 | 137 | 137 | 76 | 76 | 144 | 144 | 230 | 230 | 247 | 251 | 294 | 296 | 200 | 206 | 220 | 226 |
| 99rbl.207 | 135 | 137 | 76 | 76 | 144 | 158 | 222 | 224 | 247 | 249 | 292 | 302 | 198 | 198 | 220 | 236 |
| 99rbl.208 | 137 | 137 | 76 | 76 | 144 | 156 | 222 | 222 | 235 | 239 | 302 | 302 | 202 | 202 | 236 | 238 |
| 99rbl.209 | 137 | 137 | 76 | 76 | 144 | 144 | 226 | 238 | 237 | 249 | 294 | 302 | 160 | 200 | 194 | 226 |
| 99rbl.215 | 135 | 137 | 76 | 76 | 144 | 156 | 222 | 226 | 249 | 249 | 300 | 302 | 196 | 198 | 234 | 236 |
| 99rbl.219 | 137 | 137 | 76 | 76 | 144 | 144 | 224 | 234 | 239 | 239 | 292 | 298 | 200 | 200 | 226 | 226 |
| 99rbl.220 | 135 | 137 | 76 | 76 | 144 | 204 | 230 | 248 | 235 | 237 | 302 | 302 | 200 | 202 | 248 | 252 |
| 99rbl.222 | 135 | 135 | 76 | 76 | 144 | 158 | 224 | 230 | 247 | 249 | 298 | 298 | 196 | 200 | 244 | 250 |
| 99rbl.223 | 135 | 137 | 76 | 76 | 158 | 184 | 224 | 230 | 247 | 247 | 292 | 294 | 196 | 196 | 236 | 236 |

|           |     |     |    |    |     |     |     |     |     |     |     |     |     |     |     |     |
|-----------|-----|-----|----|----|-----|-----|-----|-----|-----|-----|-----|-----|-----|-----|-----|-----|
| 99rbl.224 | 135 | 137 | 76 | 76 | 144 | 152 | 222 | 230 | 249 | 251 | 296 | 302 | 196 | 206 | 212 | 236 |
| 99rbl.225 | 137 | 137 | 76 | 76 | 144 | 144 | 222 | 230 | 241 | 247 | 296 | 300 | 198 | 200 | 238 | 238 |
| 99rbl.227 | 137 | 137 | 76 | 76 | 144 | 152 | 224 | 230 | 237 | 245 | 294 | 300 | 198 | 202 | 214 | 238 |
| 99rbl.229 | 137 | 137 | 76 | 76 | 144 | 188 | 220 | 230 | 247 | 247 | 296 | 296 | 196 | 200 | 250 | 250 |
| 99rbl.230 | 135 | 135 | 76 | 76 | 144 | 156 | 214 | 226 | 239 | 251 | 294 | 300 | 200 | 210 | 192 | 238 |
| 99rbl.231 | 137 | 137 | 76 | 78 | 156 | 156 | 224 | 240 | 239 | 241 | 298 | 304 | 202 | 202 | 236 | 238 |
| 99rbl.233 | 137 | 137 | 76 | 76 | 156 | 156 | 230 | 238 | 235 | 245 | 298 | 302 | 196 | 204 | 222 | 230 |
| 99rbl.234 | 137 | 137 | 76 | 76 | 144 | 182 | 228 | 230 | 247 | 255 | 294 | 300 | 196 | 200 | 226 | 236 |
| 99rbl.239 | 137 | 137 | 76 | 76 | 152 | 152 | 222 | 230 | 247 | 251 | 296 | 300 | 202 | 204 | 218 | 220 |
| 99rbl.242 | 137 | 137 | 76 | 76 | 156 | 162 | 224 | 230 | 239 | 249 | 296 | 300 | 202 | 210 | 250 | 252 |
| 99rbl.243 | 137 | 137 | 76 | 76 | 144 | 156 | 230 | 230 | 247 | 251 | 298 | 302 | 198 | 204 | 212 | 220 |
| 99rbl.246 | 137 | 137 | 76 | 76 | 144 | 144 | 224 | 226 | 245 | 253 | 298 | 302 | 160 | 202 | 250 | 252 |
| 99rbl.248 | 135 | 137 | 76 | 76 | 144 | 144 | 224 | 236 | 247 | 247 | 304 | 306 | 202 | 208 | 238 | 238 |
| 99rbl.249 | 135 | 137 | 76 | 76 | 144 | 162 | 222 | 222 | 237 | 245 | 296 | 302 | 202 | 208 | 192 | 232 |
| 99rbl.256 | 137 | 137 | 76 | 76 | 144 | 156 | 224 | 230 | 235 | 245 | 298 | 302 | 202 | 202 | 230 | 236 |
| 99rbl.258 | 135 | 137 | 76 | 76 | 144 | 176 | 222 | 232 | 245 | 245 | 292 | 302 | 196 | 202 | 220 | 238 |
| 99rbl.259 | 137 | 137 | 76 | 76 | 144 | 180 | 224 | 230 | 235 | 239 | 300 | 306 | 202 | 202 | 220 | 236 |
| 99rbl.263 | 137 | 137 | 76 | 76 | 152 | 156 | 222 | 230 | 245 | 249 | 296 | 312 | 180 | 204 | 220 | 220 |
| 99rbl.267 | 137 | 137 | 76 | 76 | 144 | 156 | 228 | 230 | 239 | 245 | 296 | 300 | 196 | 200 | 220 | 228 |
| 99rbl.268 | 135 | 135 | 76 | 76 | 152 | 180 | 222 | 230 | 239 | 245 | 302 | 304 | 196 | 196 | 216 | 228 |
| 99rbl.274 | 137 | 137 | 76 | 76 | 144 | 144 | 230 | 236 | 245 | 249 | 294 | 298 | 198 | 200 | 234 | 236 |
| 99rbl.278 | 137 | 137 | 76 | 76 | 156 | 158 | 226 | 228 | 241 | 249 | 300 | 306 | 202 | 202 | 212 | 234 |
| 99rbl.281 | 137 | 137 | 76 | 76 | 144 | 144 | 226 | 228 | 249 | 249 | 302 | 302 | 202 | 206 | 236 | 236 |
| 99rbl.287 | 135 | 137 | 76 | 76 | 144 | 144 | 224 | 234 | 239 | 249 | 300 | 300 | 202 | 204 | 192 | 234 |
| 99rbl.289 | 135 | 137 | 76 | 76 | 144 | 162 | 212 | 212 | 235 | 245 | 302 | 302 | 198 | 200 | 192 | 220 |
| 99rbl.290 | 137 | 137 | 76 | 76 | 144 | 144 | 232 | 244 | 245 | 247 | 300 | 302 | 160 | 204 | 236 | 240 |
| 99rbl.292 | 137 | 137 | 76 | 76 | 144 | 162 | 220 | 232 | 245 | 247 | 294 | 310 | 200 | 206 | 212 | 260 |
| 99rbl.294 | 135 | 137 | 76 | 76 | 144 | 144 | 220 | 242 | 241 | 247 | 300 | 302 | 196 | 202 | 220 | 234 |
| 99rbl.295 | 137 | 137 | 76 | 76 | 144 | 144 | 238 | 248 | 249 | 251 | 298 | 304 | 202 | 204 | 234 | 236 |
| 99rbl.298 | 135 | 137 | 76 | 76 | 144 | 168 | 222 | 230 | 239 | 251 | 300 | 300 | 202 | 202 | 192 | 220 |
| 00rbl.001 | 135 | 137 | 76 | 76 | 144 | 158 | 224 | 224 | 251 | 251 | 298 | 300 | 160 | 196 | 226 | 238 |
| 00rbl.002 | 137 | 137 | 76 | 76 | 144 | 158 | 220 | 248 | 243 | 249 | 298 | 300 | 202 | 202 | 214 | 238 |
| 00rbl.005 | 137 | 137 | 76 | 76 | 144 | 160 | 222 | 230 | 245 | 249 | 304 | 306 | 200 | 200 | 238 | 248 |
| 00rbl.006 | 137 | 137 | 76 | 76 | 144 | 152 | 224 | 232 | 247 | 249 | 300 | 306 | 160 | 198 | 228 | 242 |
| 00rbl.007 | 137 | 137 | 76 | 78 | 144 | 144 | 230 | 230 | 245 | 249 | 300 | 306 | 202 | 210 | 234 | 236 |
| 00rbl.009 | 137 | 137 | 76 | 78 | 144 | 156 | 222 | 224 | 237 | 245 | 296 | 306 | 202 | 210 | 220 | 236 |
| 00rbl.010 | 137 | 137 | 76 | 76 | 144 | 144 | 224 | 232 | 247 | 247 | 302 | 302 | 204 | 204 | 214 | 244 |

|           |     |     |    |    |     |     |     |     |     |     |     |     |     |     |     |     |
|-----------|-----|-----|----|----|-----|-----|-----|-----|-----|-----|-----|-----|-----|-----|-----|-----|
| 00rbl.011 | 137 | 137 | 76 | 76 | 144 | 144 | 224 | 224 | 253 | 253 | 296 | 300 | 200 | 204 | 230 | 238 |
| 00rbl.012 | 137 | 137 | 76 | 76 | 140 | 144 | 222 | 244 | 237 | 251 | 302 | 306 | 202 | 210 | 192 | 224 |
| 00rbl.016 | 137 | 137 | 76 | 76 | 144 | 144 | 224 | 232 | 239 | 251 | 270 | 298 | 196 | 204 | 214 | 234 |
| 00rbl.022 | 137 | 137 | 76 | 76 | 144 | 144 | 226 | 232 | 243 | 245 | 296 | 300 | 202 | 202 | 214 | 234 |
| 00rbl.023 | 137 | 137 | 76 | 76 | 154 | 156 | 224 | 226 | 237 | 247 | 270 | 296 | 198 | 198 | 234 | 238 |
| 00rbl.025 | 137 | 137 | 76 | 76 | 144 | 158 | 226 | 226 | 249 | 249 | 296 | 300 | 198 | 198 | 222 | 252 |
| 00rbl.028 | 135 | 137 | 76 | 76 | 144 | 144 | 226 | 240 | 249 | 249 | 296 | 308 | 202 | 206 | 228 | 240 |
| 00rbl.040 | 137 | 137 | 76 | 76 | 144 | 144 | 224 | 240 | 239 | 247 | 302 | 304 | 200 | 202 | 218 | 240 |
| 00rbl.043 | 137 | 137 | 76 | 76 | 144 | 144 | 226 | 226 | 235 | 245 | 296 | 302 | 196 | 202 | 222 | 242 |
| 00rbl.048 | 135 | 137 | 76 | 76 | 176 | 188 | 230 | 234 | 235 | 245 | 298 | 304 | 202 | 202 | 220 | 234 |
| 00rbl.064 | 137 | 137 | 76 | 76 | 156 | 158 | 220 | 230 | 237 | 247 | 304 | 306 | 202 | 210 | 218 | 250 |
| 00rbl.065 | 137 | 137 | 76 | 76 | 144 | 156 | 222 | 232 | 239 | 245 | 296 | 296 | 160 | 200 | 218 | 232 |
| 00rbl.066 | 137 | 137 | 76 | 76 | 154 | 156 | 220 | 228 | 251 | 251 | 298 | 304 | 160 | 200 | 234 | 270 |
| 00rbl.069 | 137 | 137 | 76 | 76 | 144 | 144 | 224 | 230 | 237 | 239 | 270 | 302 | 202 | 202 | 202 | 232 |
| 00rbl.070 | 137 | 137 | 76 | 76 | 144 | 156 | 222 | 230 | 245 | 247 | 300 | 302 | 160 | 202 | 234 | 236 |
| 00rbl.073 | 137 | 137 | 76 | 76 | 144 | 144 | 230 | 230 | 247 | 257 | 296 | 296 | 200 | 202 | 236 | 236 |
| 00rbl.075 | 137 | 137 | 76 | 76 | 156 | 156 | 224 | 230 | 239 | 251 | 292 | 296 | 200 | 202 | 220 | 220 |
| 00rbl.077 | 137 | 137 | 76 | 76 | 144 | 152 | 222 | 228 | 247 | 247 | 298 | 302 | 200 | 202 | 218 | 234 |
| 00rbl.082 | 137 | 137 | 76 | 76 | 144 | 156 | 230 | 252 | 235 | 251 | 298 | 300 | 198 | 202 | 226 | 236 |
| 00rbl.085 | 137 | 137 | 76 | 76 | 144 | 158 | 224 | 230 | 241 | 247 | 294 | 300 | 202 | 202 | 222 | 230 |
| 00rbl.089 | 137 | 137 | 76 | 76 | 144 | 144 | 230 | 230 | 237 | 245 | 296 | 298 | 196 | 202 | 236 | 238 |
| 00rbl.096 | 137 | 137 | 76 | 78 | 144 | 156 | 224 | 236 | 241 | 253 | 298 | 298 | 196 | 202 | 216 | 234 |
| 00rbl.097 | 137 | 137 | 76 | 76 | 144 | 144 | 230 | 236 | 239 | 245 | 298 | 300 | 196 | 202 | 236 | 240 |
| 00rbl.099 | 137 | 137 | 76 | 76 | 144 | 156 | 228 | 248 | 251 | 251 | 296 | 302 | 200 | 208 | 216 | 218 |
| 00rbl.104 | 137 | 137 | 76 | 76 | 152 | 156 | 220 | 224 | 237 | 245 | 298 | 302 | 200 | 202 | 220 | 236 |
| 00rbl.107 | 137 | 137 | 76 | 76 | 144 | 156 | 224 | 244 | 249 | 249 | 298 | 300 | 200 | 200 | 234 | 246 |
| 00rbl.108 | 137 | 137 | 76 | 76 | 144 | 146 | 224 | 236 | 247 | 249 | 302 | 302 | 196 | 202 | 230 | 238 |
| 00rbl.111 | 137 | 137 | 76 | 76 | 144 | 144 | 226 | 230 | 239 | 239 | 304 | 306 | 198 | 200 | 226 | 248 |
| 00rbl.118 | 137 | 137 | 74 | 76 | 144 | 144 | 224 | 232 | 247 | 249 | 294 | 298 | 198 | 198 | 226 | 238 |
| 00rbl.120 | 137 | 137 | 76 | 78 | 144 | 144 | 222 | 226 | 235 | 247 | 296 | 304 | 202 | 202 | 220 | 236 |
| 00rbl.122 | 137 | 137 | 76 | 76 | 144 | 154 | 232 | 240 | 239 | 251 | 298 | 304 | 196 | 200 | 192 | 248 |
| 00rbl.123 | 137 | 137 | 76 | 76 | 144 | 144 | 224 | 234 | 245 | 245 | 294 | 294 | 198 | 202 | 220 | 240 |
| 00rbl.124 | 137 | 137 | 76 | 76 | 144 | 144 | 262 | 264 | 235 | 247 | 298 | 298 | 200 | 202 | 226 | 238 |
| 00rbl.126 | 135 | 137 | 76 | 78 | 140 | 152 | 222 | 222 | 253 | 253 | 298 | 302 | 202 | 206 | 216 | 236 |
| 00rbl.135 | 137 | 137 | 76 | 76 | 152 | 164 | 232 | 232 | 243 | 249 | 296 | 302 | 196 | 208 | 220 | 226 |
| 00rbl.137 | 135 | 137 | 76 | 76 | 156 | 160 | 232 | 240 | 247 | 253 | 298 | 318 | 200 | 206 | 222 | 246 |
| 00rbl.154 | 135 | 137 | 76 | 76 | 162 | 162 | 226 | 232 | 235 | 247 | 296 | 296 | 202 | 204 | 218 | 220 |

|           |     |     |    |    |     |     |     |     |     |     |     |     |     |     |     |     |
|-----------|-----|-----|----|----|-----|-----|-----|-----|-----|-----|-----|-----|-----|-----|-----|-----|
| 00rbl.155 | 135 | 137 | 76 | 76 | 144 | 152 | 230 | 248 | 245 | 249 | 302 | 304 | 196 | 204 | 226 | 252 |
| 00rbl.158 | 137 | 137 | 76 | 78 | 144 | 144 | 232 | 236 | 247 | 251 | 304 | 304 | 202 | 204 | 232 | 234 |
| 00rbl.160 | 137 | 137 | 76 | 76 | 144 | 156 | 228 | 232 | 249 | 249 | 284 | 298 | 196 | 200 | 228 | 238 |
| 00rbl.163 | 137 | 137 | 76 | 76 | 144 | 156 | 232 | 238 | 249 | 257 | 294 | 310 | 200 | 202 | 240 | 254 |
| 00rbl.164 | 137 | 137 | 76 | 78 | 144 | 156 | 220 | 230 | 239 | 249 | 300 | 302 | 200 | 202 | 222 | 226 |
| 00rbl.169 | 137 | 137 | 76 | 78 | 144 | 156 | 222 | 226 | 245 | 245 | 296 | 306 | 200 | 200 | 234 | 236 |
| 00rbl.176 | 135 | 137 | 76 | 78 | 144 | 156 | 222 | 236 | 239 | 241 | 296 | 296 | 200 | 202 | 234 | 234 |
| 00rbl.178 | 135 | 137 | 76 | 76 | 144 | 188 | 222 | 238 | 239 | 255 | 288 | 296 | 200 | 206 | 228 | 248 |
| 00rbl.179 | 137 | 137 | 76 | 76 | 144 | 144 | 222 | 222 | 247 | 249 | 294 | 304 | 196 | 202 | 234 | 234 |
| 00rbl.180 | 137 | 137 | 76 | 76 | 144 | 144 | 230 | 256 | 245 | 247 | 298 | 300 | 160 | 202 | 232 | 254 |
| 00rbl.183 | 135 | 137 | 76 | 76 | 144 | 144 | 228 | 248 | 239 | 247 | 298 | 302 | 200 | 202 | 218 | 220 |
| 00rbl.186 | 137 | 137 | 76 | 76 | 144 | 188 | 232 | 236 | 239 | 247 | 302 | 306 | 198 | 200 | 210 | 236 |
| 00rbl.191 | 137 | 137 | 76 | 76 | 144 | 156 | 234 | 240 | 247 | 247 | 306 | 308 | 198 | 202 | 220 | 226 |
| 00rbl.194 | 137 | 137 | 76 | 76 | 178 | 190 | 234 | 242 | 247 | 247 | 296 | 298 | 200 | 200 | 224 | 236 |
| 00rbl.196 | 135 | 137 | 76 | 76 | 156 | 156 | 232 | 240 | 251 | 251 | 290 | 300 | 200 | 200 | 212 | 232 |
| 00rbl.198 | 135 | 135 | 76 | 76 | 144 | 144 | 240 | 240 | 241 | 241 | 296 | 300 | 202 | 204 | 238 | 244 |
| 00rbl.202 | 137 | 137 | 76 | 76 | 144 | 156 | 232 | 234 | 237 | 239 | 302 | 302 | 196 | 212 | 232 | 236 |
| 00rbl.203 | 137 | 137 | 76 | 76 | 144 | 144 | 238 | 240 | 247 | 247 | 296 | 300 | 202 | 202 | 222 | 234 |
| 00rbl.204 | 137 | 137 | 76 | 76 | 144 | 158 | 230 | 230 | 247 | 247 | 302 | 306 | 202 | 202 | 234 | 234 |
| 00rbl.206 | 135 | 137 | 76 | 76 | 156 | 162 | 224 | 232 | 247 | 247 | 300 | 300 | 198 | 200 | 242 | 244 |
| 00rbl.212 | 137 | 137 | 76 | 76 | 144 | 144 | 232 | 242 | 237 | 251 | 300 | 328 | 202 | 210 | 236 | 236 |
| 00rbl.217 | 135 | 137 | 76 | 76 | 144 | 144 | 230 | 230 | 243 | 249 | 298 | 304 | 200 | 200 | 214 | 236 |
| 00rbl.223 | 137 | 137 | 74 | 76 | 144 | 156 | 214 | 226 | 247 | 247 | 298 | 298 | 196 | 202 | 228 | 244 |
| 00rbl.225 | 137 | 137 | 76 | 76 | 144 | 144 | 224 | 230 | 247 | 247 | 302 | 304 | 202 | 202 | 232 | 234 |
| 00rbl.227 | 137 | 137 | 76 | 76 | 156 | 156 | 236 | 248 | 247 | 247 | 296 | 312 | 180 | 200 | 220 | 220 |
| 00rbl.228 | 137 | 137 | 76 | 76 | 144 | 162 | 232 | 248 | 239 | 239 | 300 | 300 | 200 | 202 | 242 | 250 |
| 00rbl.232 | 137 | 137 | 76 | 78 | 144 | 156 | 232 | 240 | 245 | 245 | 298 | 304 | 160 | 202 | 212 | 212 |
| 00rbl.236 | 137 | 137 | 76 | 76 | 144 | 144 | 230 | 242 | 247 | 247 | 294 | 302 | 202 | 202 | 256 | 270 |
| 00rbl.239 | 137 | 137 | 76 | 76 | 144 | 144 | 232 | 240 | 237 | 251 | 294 | 304 | 202 | 202 | 232 | 252 |
| 00rbl.240 | 137 | 137 | 76 | 78 | 144 | 152 | 228 | 266 | 241 | 245 | 296 | 296 | 204 | 206 | 220 | 240 |
| 00rbl.242 | 137 | 137 | 76 | 76 | 144 | 144 | 228 | 252 | 241 | 247 | 294 | 296 | 200 | 202 | 232 | 234 |
| 00rbl.244 | 137 | 137 | 76 | 76 | 156 | 156 | 236 | 266 | 243 | 245 | 294 | 296 | 200 | 206 | 242 | 252 |
| 00rbl.245 | 137 | 137 | 76 | 76 | 144 | 158 | 228 | 230 | 251 | 251 | 294 | 294 | 200 | 200 | 236 | 236 |
| 00rbl.249 | 137 | 137 | 76 | 76 | 144 | 144 | 224 | 240 | 249 | 249 | 294 | 302 | 200 | 200 | 234 | 270 |
| 00rbl.257 | 137 | 137 | 76 | 76 | 144 | 144 | 224 | 242 | 247 | 249 | 294 | 296 | 200 | 202 | 232 | 232 |
| 00rbl.258 | 137 | 137 | 76 | 76 | 144 | 144 | 222 | 226 | 249 | 249 | 0   | 0   | 200 | 202 | 238 | 254 |
| 00rbl.263 | 137 | 137 | 76 | 76 | 144 | 144 | 222 | 236 | 237 | 245 | 292 | 304 | 202 | 202 | 226 | 228 |

|           |     |     |    |    |     |     |     |     |     |     |     |     |     |     |     |     |
|-----------|-----|-----|----|----|-----|-----|-----|-----|-----|-----|-----|-----|-----|-----|-----|-----|
| 00rbl.267 | 137 | 137 | 76 | 78 | 144 | 144 | 224 | 230 | 237 | 251 | 298 | 300 | 200 | 202 | 192 | 234 |
| 00rbl.268 | 137 | 137 | 76 | 76 | 144 | 144 | 224 | 252 | 249 | 249 | 296 | 300 | 200 | 200 | 220 | 268 |
| 00rbl.271 | 137 | 137 | 76 | 76 | 144 | 144 | 220 | 230 | 247 | 251 | 296 | 302 | 196 | 200 | 234 | 236 |
| 00rbl.273 | 135 | 137 | 74 | 76 | 144 | 144 | 238 | 238 | 243 | 253 | 298 | 302 | 200 | 202 | 194 | 238 |
| 00rbl.277 | 137 | 137 | 76 | 76 | 164 | 188 | 230 | 238 | 239 | 245 | 300 | 302 | 200 | 200 | 216 | 236 |
| 00rbl.278 | 137 | 137 | 76 | 78 | 144 | 156 | 232 | 244 | 235 | 247 | 300 | 308 | 198 | 202 | 238 | 240 |
| 00rbl.282 | 135 | 137 | 76 | 76 | 144 | 144 | 224 | 238 | 239 | 245 | 300 | 302 | 196 | 200 | 220 | 236 |
| 00rbl.284 | 137 | 137 | 76 | 76 | 156 | 164 | 226 | 226 | 247 | 249 | 300 | 306 | 200 | 202 | 234 | 234 |
| 00rbl.288 | 137 | 137 | 76 | 76 | 140 | 164 | 220 | 256 | 239 | 247 | 300 | 304 | 200 | 200 | 234 | 250 |
| 00rbl.290 | 137 | 137 | 76 | 76 | 144 | 152 | 228 | 242 | 245 | 249 | 296 | 296 | 196 | 196 | 220 | 220 |
| 00rbl.294 | 137 | 137 | 76 | 76 | 144 | 158 | 226 | 230 | 241 | 251 | 296 | 300 | 200 | 202 | 194 | 238 |
| 00rbl.295 | 137 | 137 | 76 | 76 | 144 | 144 | 234 | 236 | 245 | 249 | 298 | 300 | 200 | 202 | 220 | 238 |
| 00rbl.299 | 137 | 137 | 76 | 76 | 144 | 164 | 220 | 222 | 239 | 251 | 296 | 302 | 196 | 202 | 234 | 238 |
| 00rbl.301 | 137 | 137 | 76 | 76 | 144 | 144 | 224 | 236 | 253 | 253 | 296 | 304 | 200 | 202 | 202 | 226 |
| 00rbl.302 | 137 | 137 | 76 | 76 | 144 | 144 | 230 | 232 | 239 | 247 | 294 | 302 | 202 | 202 | 236 | 236 |
| 00rbl.304 | 137 | 137 | 76 | 76 | 144 | 162 | 222 | 224 | 241 | 249 | 296 | 304 | 200 | 202 | 192 | 224 |
| 00rbl.306 | 137 | 137 | 76 | 76 | 144 | 144 | 228 | 230 | 247 | 247 | 296 | 308 | 202 | 202 | 216 | 234 |
| 00rbl.307 | 137 | 137 | 76 | 76 | 144 | 144 | 226 | 230 | 247 | 247 | 298 | 310 | 200 | 202 | 214 | 234 |
| 00rbl.309 | 137 | 137 | 76 | 76 | 144 | 156 | 222 | 240 | 249 | 249 | 296 | 302 | 204 | 204 | 230 | 242 |
| 00rbl.312 | 137 | 137 | 76 | 76 | 144 | 144 | 224 | 230 | 239 | 247 | 300 | 302 | 200 | 202 | 216 | 234 |
| 00rbl.320 | 137 | 137 | 76 | 76 | 144 | 144 | 224 | 230 | 245 | 249 | 298 | 302 | 200 | 202 | 220 | 220 |
| 00rbl.321 | 137 | 137 | 76 | 78 | 144 | 156 | 232 | 234 | 237 | 239 | 298 | 300 | 160 | 212 | 220 | 224 |
| 00rbl.324 | 137 | 137 | 76 | 76 | 144 | 144 | 234 | 234 | 239 | 239 | 302 | 314 | 200 | 200 | 214 | 234 |
| 00rbl.325 | 137 | 137 | 76 | 76 | 144 | 144 | 230 | 232 | 239 | 249 | 300 | 300 | 200 | 202 | 0   | 0   |
| 00rbl.326 | 137 | 137 | 76 | 76 | 144 | 188 | 224 | 224 | 245 | 249 | 294 | 298 | 196 | 200 | 218 | 220 |
| 00rbl.327 | 137 | 137 | 76 | 76 | 144 | 144 | 232 | 250 | 245 | 247 | 294 | 294 | 200 | 202 | 234 | 248 |
| 00rbl.328 | 137 | 137 | 76 | 76 | 144 | 158 | 226 | 230 | 235 | 239 | 296 | 298 | 196 | 196 | 222 | 234 |
| 00rbl.335 | 137 | 137 | 76 | 78 | 144 | 156 | 220 | 222 | 247 | 247 | 298 | 298 | 200 | 202 | 250 | 252 |
| 00rbl.336 | 137 | 137 | 76 | 76 | 144 | 182 | 232 | 250 | 247 | 249 | 294 | 294 | 202 | 204 | 234 | 248 |
| 00rbl.337 | 137 | 137 | 76 | 78 | 156 | 158 | 222 | 232 | 247 | 249 | 296 | 302 | 196 | 200 | 220 | 260 |
| 00rbl.344 | 137 | 137 | 76 | 76 | 144 | 144 | 240 | 258 | 241 | 247 | 298 | 300 | 160 | 200 | 218 | 238 |
| 00rbl.347 | 137 | 137 | 76 | 76 | 144 | 144 | 224 | 228 | 253 | 253 | 296 | 300 | 202 | 204 | 228 | 248 |
| 00rbl.351 | 137 | 137 | 76 | 76 | 144 | 156 | 222 | 230 | 245 | 247 | 304 | 306 | 200 | 202 | 228 | 236 |
| 00rbl.354 | 137 | 137 | 76 | 76 | 144 | 144 | 222 | 226 | 239 | 247 | 296 | 298 | 200 | 202 | 234 | 236 |
| 00rbl.355 | 137 | 137 | 76 | 76 | 144 | 144 | 222 | 230 | 239 | 245 | 296 | 302 | 202 | 204 | 228 | 234 |
| 00rbl.357 | 137 | 137 | 76 | 76 | 144 | 144 | 236 | 238 | 243 | 249 | 300 | 300 | 202 | 204 | 232 | 236 |
| 00rbl.359 | 137 | 137 | 76 | 76 | 144 | 144 | 222 | 226 | 245 | 251 | 294 | 304 | 202 | 202 | 244 | 260 |

|           |     |     |    |    |     |     |     |     |     |     |     |     |     |     |     |     |
|-----------|-----|-----|----|----|-----|-----|-----|-----|-----|-----|-----|-----|-----|-----|-----|-----|
| 00rbl.364 | 137 | 137 | 76 | 76 | 144 | 144 | 228 | 232 | 249 | 249 | 294 | 294 | 200 | 202 | 0   | 0   |
| 00rbl.372 | 137 | 137 | 76 | 76 | 144 | 144 | 228 | 232 | 239 | 247 | 296 | 300 | 200 | 202 | 0   | 0   |
| 01rbl.002 | 137 | 137 | 76 | 76 | 144 | 144 | 242 | 244 | 245 | 245 | 302 | 308 | 200 | 202 | 234 | 264 |
| 01rbl.003 | 137 | 137 | 76 | 76 | 154 | 158 | 240 | 240 | 241 | 245 | 298 | 304 | 196 | 204 | 222 | 236 |
| 01rbl.004 | 137 | 137 | 76 | 76 | 144 | 156 | 226 | 244 | 247 | 249 | 300 | 330 | 196 | 202 | 222 | 254 |
| 01rbl.005 | 137 | 137 | 76 | 76 | 172 | 188 | 226 | 242 | 245 | 255 | 296 | 304 | 202 | 204 | 234 | 236 |
| 01rbl.009 | 137 | 137 | 76 | 78 | 154 | 156 | 228 | 244 | 241 | 245 | 298 | 304 | 160 | 204 | 220 | 222 |
| 01rbl.010 | 137 | 137 | 76 | 76 | 144 | 144 | 232 | 242 | 247 | 247 | 298 | 304 | 204 | 204 | 236 | 256 |
| 01rbl.013 | 137 | 137 | 76 | 78 | 144 | 144 | 228 | 244 | 241 | 245 | 298 | 298 | 160 | 204 | 192 | 222 |
| 01rbl.015 | 137 | 137 | 76 | 76 | 144 | 154 | 240 | 244 | 247 | 247 | 298 | 304 | 204 | 204 | 236 | 238 |
| 01rbl.017 | 137 | 137 | 76 | 76 | 158 | 164 | 234 | 244 | 247 | 247 | 308 | 332 | 202 | 204 | 236 | 240 |
| 01rbl.021 | 137 | 137 | 76 | 76 | 144 | 158 | 224 | 232 | 241 | 251 | 296 | 308 | 198 | 202 | 220 | 242 |
| 01rbl.022 | 137 | 137 | 76 | 76 | 144 | 144 | 232 | 244 | 247 | 247 | 298 | 304 | 204 | 204 | 222 | 256 |
| 01rbl.023 | 135 | 137 | 76 | 76 | 154 | 162 | 234 | 238 | 249 | 249 | 304 | 306 | 202 | 204 | 222 | 252 |
| 01rbl.024 | 137 | 137 | 76 | 78 | 144 | 166 | 234 | 244 | 247 | 247 | 296 | 302 | 200 | 202 | 236 | 240 |
| 01rbl.025 | 137 | 137 | 76 | 76 | 144 | 144 | 242 | 250 | 247 | 247 | 298 | 332 | 204 | 204 | 220 | 222 |
| 01rbl.026 | 137 | 137 | 76 | 76 | 158 | 162 | 214 | 248 | 247 | 247 | 296 | 304 | 200 | 202 | 236 | 250 |
| 01rbl.027 | 137 | 137 | 76 | 76 | 144 | 144 | 224 | 224 | 251 | 251 | 294 | 300 | 202 | 204 | 204 | 250 |
| 01rbl.030 | 137 | 137 | 76 | 76 | 144 | 156 | 230 | 240 | 251 | 253 | 296 | 298 | 198 | 204 | 234 | 236 |
| 01rbl.031 | 137 | 137 | 76 | 76 | 144 | 144 | 224 | 234 | 241 | 245 | 294 | 298 | 200 | 200 | 222 | 228 |
| 01rbl.032 | 137 | 137 | 76 | 76 | 144 | 144 | 224 | 230 | 249 | 251 | 298 | 300 | 194 | 206 | 214 | 238 |
| 01rbl.035 | 137 | 137 | 76 | 76 | 144 | 144 | 224 | 238 | 241 | 247 | 298 | 298 | 200 | 202 | 0   | 0   |
| 01rbl.037 | 137 | 137 | 76 | 76 | 144 | 144 | 224 | 230 | 247 | 247 | 300 | 302 | 202 | 202 | 0   | 0   |
| 01rbl.038 | 137 | 137 | 76 | 76 | 144 | 144 | 230 | 230 | 237 | 253 | 304 | 306 | 196 | 202 | 234 | 240 |
| 01rbl.042 | 137 | 137 | 76 | 76 | 144 | 144 | 222 | 224 | 247 | 247 | 298 | 302 | 198 | 202 | 214 | 234 |
| 01rbl.044 | 137 | 137 | 76 | 76 | 144 | 144 | 230 | 248 | 247 | 247 | 302 | 304 | 206 | 208 | 226 | 234 |
| 01rbl.046 | 137 | 137 | 76 | 76 | 144 | 144 | 238 | 266 | 247 | 247 | 296 | 302 | 202 | 202 | 238 | 238 |
| 01rbl.049 | 137 | 137 | 76 | 76 | 144 | 158 | 222 | 226 | 251 | 253 | 298 | 302 | 200 | 202 | 220 | 220 |
| 01rbl.050 | 137 | 137 | 76 | 76 | 144 | 144 | 228 | 238 | 245 | 255 | 300 | 318 | 196 | 200 | 218 | 220 |
| 01rbl.051 | 137 | 137 | 76 | 76 | 144 | 158 | 222 | 224 | 247 | 249 | 298 | 306 | 200 | 202 | 192 | 212 |
| 01rbl.053 | 137 | 137 | 76 | 76 | 144 | 168 | 230 | 234 | 249 | 253 | 296 | 300 | 200 | 206 | 240 | 240 |
| 01rbl.054 | 135 | 137 | 76 | 76 | 156 | 156 | 224 | 240 | 249 | 251 | 294 | 296 | 200 | 200 | 226 | 250 |
| 01rbl.057 | 137 | 137 | 74 | 76 | 144 | 156 | 224 | 230 | 249 | 251 | 298 | 300 | 200 | 200 | 220 | 240 |
| 01rbl.060 | 137 | 137 | 76 | 76 | 144 | 162 | 224 | 224 | 249 | 249 | 296 | 300 | 202 | 204 | 238 | 240 |
| 01rbl.061 | 135 | 137 | 76 | 76 | 144 | 156 | 226 | 230 | 239 | 247 | 296 | 306 | 198 | 210 | 214 | 238 |
| 01rbl.063 | 137 | 137 | 76 | 76 | 144 | 144 | 230 | 238 | 241 | 249 | 302 | 302 | 192 | 202 | 224 | 234 |
| 01rbl.067 | 137 | 137 | 76 | 76 | 144 | 144 | 214 | 240 | 241 | 249 | 300 | 302 | 196 | 204 | 250 | 252 |



|           |     |     |    |    |     |     |     |     |     |     |     |     |     |     |     |     |
|-----------|-----|-----|----|----|-----|-----|-----|-----|-----|-----|-----|-----|-----|-----|-----|-----|
| 01rbl.069 | 137 | 137 | 72 | 76 | 144 | 156 | 222 | 232 | 239 | 247 | 294 | 298 | 198 | 200 | 220 | 238 |
| 01rbl.073 | 137 | 137 | 76 | 76 | 144 | 156 | 224 | 230 | 239 | 247 | 296 | 330 | 196 | 198 | 218 | 238 |
| 01rbl.074 | 137 | 137 | 76 | 76 | 144 | 160 | 236 | 242 | 241 | 241 | 300 | 308 | 196 | 206 | 218 | 238 |
| 01rbl.078 | 137 | 137 | 76 | 76 | 154 | 158 | 232 | 238 | 247 | 247 | 294 | 296 | 200 | 202 | 218 | 234 |
| 01rbl.079 | 137 | 137 | 76 | 76 | 144 | 158 | 232 | 234 | 235 | 239 | 298 | 304 | 200 | 202 | 228 | 236 |
| 01rbl.083 | 137 | 137 | 76 | 76 | 144 | 144 | 226 | 248 | 237 | 249 | 290 | 300 | 160 | 208 | 242 | 254 |
| 01rbl.086 | 137 | 137 | 76 | 76 | 144 | 144 | 222 | 224 | 247 | 247 | 292 | 296 | 160 | 200 | 0   | 0   |
| 01rbl.087 | 137 | 137 | 76 | 76 | 144 | 158 | 230 | 240 | 241 | 247 | 296 | 296 | 200 | 202 | 238 | 238 |
| 01rbl.088 | 137 | 137 | 76 | 76 | 144 | 158 | 222 | 224 | 247 | 247 | 304 | 312 | 200 | 204 | 218 | 220 |
| 01rbl.090 | 137 | 137 | 76 | 76 | 144 | 144 | 222 | 238 | 247 | 247 | 300 | 310 | 202 | 202 | 192 | 220 |
| 01rbl.091 | 137 | 137 | 76 | 78 | 144 | 156 | 222 | 224 | 247 | 247 | 298 | 306 | 202 | 206 | 220 | 232 |
| 01rbl.093 | 137 | 137 | 76 | 76 | 144 | 144 | 238 | 240 | 247 | 247 | 300 | 320 | 204 | 204 | 238 | 246 |
| 01rbl.094 | 137 | 137 | 76 | 76 | 144 | 156 | 224 | 234 | 241 | 249 | 296 | 312 | 202 | 202 | 230 | 240 |
| 01rbl.096 | 137 | 137 | 76 | 76 | 156 | 172 | 226 | 232 | 249 | 251 | 298 | 304 | 204 | 204 | 224 | 238 |
| 01rbl.099 | 137 | 137 | 76 | 76 | 144 | 144 | 222 | 240 | 247 | 247 | 290 | 306 | 198 | 204 | 192 | 240 |
| 01rbl.104 | 135 | 137 | 76 | 76 | 144 | 188 | 232 | 236 | 239 | 247 | 298 | 298 | 200 | 200 | 192 | 240 |
| 01rbl.105 | 137 | 137 | 76 | 76 | 144 | 176 | 240 | 240 | 241 | 251 | 296 | 300 | 200 | 208 | 212 | 220 |
| 01rbl.107 | 137 | 137 | 76 | 76 | 144 | 176 | 230 | 230 | 241 | 247 | 298 | 302 | 202 | 204 | 232 | 234 |
| 01rbl.108 | 137 | 137 | 76 | 76 | 144 | 144 | 224 | 240 | 241 | 247 | 304 | 306 | 202 | 204 | 234 | 238 |
| 01rbl.109 | 137 | 137 | 76 | 76 | 144 | 154 | 238 | 244 | 245 | 247 | 296 | 330 | 202 | 204 | 220 | 234 |
| 01rbl.110 | 137 | 137 | 76 | 76 | 150 | 158 | 234 | 238 | 245 | 251 | 298 | 300 | 196 | 208 | 212 | 242 |
| 01rbl.113 | 137 | 137 | 76 | 76 | 144 | 156 | 224 | 260 | 245 | 247 | 292 | 300 | 200 | 202 | 238 | 248 |
| 01rbl.114 | 135 | 137 | 76 | 76 | 152 | 158 | 230 | 232 | 239 | 241 | 304 | 310 | 196 | 196 | 226 | 240 |
| 01rbl.118 | 137 | 137 | 76 | 76 | 156 | 160 | 228 | 248 | 241 | 245 | 302 | 302 | 202 | 208 | 238 | 250 |
| 01rbl.119 | 135 | 137 | 76 | 76 | 144 | 158 | 226 | 240 | 247 | 247 | 306 | 320 | 196 | 204 | 226 | 238 |
| 01rbl.121 | 137 | 137 | 76 | 76 | 144 | 144 | 226 | 228 | 249 | 255 | 292 | 310 | 196 | 204 | 220 | 240 |
| 01rbl.122 | 135 | 137 | 76 | 76 | 156 | 168 | 224 | 234 | 239 | 245 | 300 | 302 | 202 | 204 | 222 | 236 |
| 01rbl.124 | 135 | 137 | 76 | 78 | 144 | 160 | 234 | 244 | 239 | 245 | 294 | 296 | 196 | 208 | 232 | 270 |
| 01rbl.125 | 135 | 137 | 76 | 76 | 144 | 144 | 240 | 264 | 247 | 251 | 298 | 304 | 200 | 202 | 192 | 200 |
| 01rbl.126 | 137 | 137 | 76 | 76 | 144 | 184 | 224 | 224 | 249 | 251 | 294 | 298 | 202 | 204 | 234 | 252 |
| 01rbl.128 | 135 | 137 | 76 | 76 | 144 | 156 | 224 | 230 | 239 | 241 | 298 | 298 | 200 | 200 | 212 | 220 |
| 01rbl.133 | 135 | 137 | 76 | 76 | 144 | 144 | 224 | 230 | 235 | 251 | 296 | 300 | 206 | 208 | 220 | 234 |
| 01rbl.135 | 137 | 137 | 76 | 76 | 144 | 182 | 246 | 248 | 239 | 241 | 300 | 300 | 198 | 204 | 216 | 218 |
| 01rbl.139 | 137 | 137 | 76 | 76 | 152 | 158 | 230 | 230 | 235 | 237 | 296 | 302 | 200 | 204 | 224 | 224 |
| 01rbl.140 | 137 | 137 | 76 | 78 | 176 | 182 | 222 | 248 | 245 | 247 | 298 | 304 | 160 | 202 | 212 | 240 |
| 01rbl.142 | 137 | 137 | 76 | 76 | 144 | 144 | 224 | 224 | 245 | 247 | 300 | 302 | 200 | 202 | 218 | 250 |
| 01rbl.143 | 137 | 137 | 76 | 76 | 144 | 144 | 224 | 224 | 239 | 247 | 300 | 318 | 180 | 212 | 220 | 236 |

|           |     |     |    |    |     |     |     |     |     |     |     |     |     |     |     |     |
|-----------|-----|-----|----|----|-----|-----|-----|-----|-----|-----|-----|-----|-----|-----|-----|-----|
| 01rbl.144 | 137 | 137 | 76 | 76 | 182 | 184 | 246 | 248 | 245 | 245 | 298 | 304 | 160 | 200 | 216 | 252 |
| 01rbl.149 | 137 | 137 | 76 | 76 | 144 | 162 | 224 | 238 | 245 | 245 | 302 | 304 | 204 | 206 | 216 | 252 |
| 01rbl.150 | 137 | 137 | 76 | 78 | 144 | 144 | 220 | 236 | 241 | 245 | 298 | 298 | 202 | 204 | 238 | 240 |
| 01rbl.153 | 137 | 137 | 76 | 78 | 156 | 176 | 224 | 224 | 239 | 243 | 298 | 302 | 202 | 204 | 236 | 240 |
| 01rbl.158 | 137 | 137 | 76 | 76 | 144 | 156 | 224 | 248 | 237 | 251 | 296 | 304 | 200 | 202 | 220 | 224 |
| 01rbl.159 | 135 | 137 | 76 | 76 | 168 | 190 | 244 | 256 | 245 | 249 | 298 | 300 | 202 | 206 | 218 | 242 |
| 01rbl.160 | 137 | 137 | 76 | 76 | 154 | 164 | 222 | 226 | 247 | 247 | 296 | 302 | 196 | 202 | 230 | 236 |
| 01rbl.161 | 137 | 137 | 76 | 76 | 144 | 164 | 224 | 242 | 245 | 249 | 296 | 304 | 200 | 208 | 240 | 254 |
| 01rbl.162 | 137 | 137 | 76 | 76 | 144 | 156 | 222 | 238 | 249 | 249 | 298 | 300 | 200 | 204 | 226 | 234 |
| 01rbl.163 | 137 | 137 | 76 | 76 | 144 | 156 | 222 | 242 | 255 | 255 | 300 | 304 | 160 | 200 | 220 | 252 |
| 01rbl.164 | 137 | 137 | 76 | 76 | 144 | 156 | 222 | 228 | 239 | 249 | 302 | 302 | 202 | 204 | 222 | 242 |
| 01rbl.165 | 137 | 137 | 76 | 76 | 144 | 144 | 220 | 224 | 239 | 241 | 296 | 308 | 160 | 200 | 212 | 230 |
| 01rbl.167 | 135 | 137 | 76 | 76 | 156 | 162 | 222 | 246 | 245 | 247 | 298 | 306 | 200 | 206 | 238 | 238 |
| 01rbl.168 | 137 | 137 | 76 | 76 | 144 | 164 | 224 | 242 | 247 | 249 | 296 | 304 | 206 | 206 | 190 | 240 |
| 01rbl.169 | 135 | 137 | 76 | 76 | 152 | 152 | 230 | 238 | 239 | 247 | 294 | 302 | 160 | 198 | 220 | 240 |
| 01rbl.170 | 137 | 137 | 76 | 76 | 144 | 156 | 246 | 250 | 239 | 249 | 298 | 302 | 200 | 202 | 222 | 222 |
| 01rbl.171 | 135 | 137 | 76 | 76 | 158 | 180 | 222 | 238 | 239 | 241 | 302 | 302 | 198 | 200 | 220 | 236 |
| 01rbl.172 | 135 | 137 | 76 | 76 | 156 | 180 | 212 | 238 | 241 | 245 | 300 | 302 | 198 | 200 | 220 | 222 |
| 01rbl.174 | 137 | 137 | 76 | 76 | 144 | 166 | 224 | 242 | 241 | 249 | 296 | 296 | 160 | 204 | 212 | 242 |
| 01rbl.175 | 137 | 137 | 76 | 76 | 156 | 156 | 230 | 238 | 245 | 247 | 294 | 298 | 160 | 202 | 222 | 238 |
| 01rbl.179 | 137 | 137 | 76 | 76 | 144 | 144 | 222 | 242 | 249 | 249 | 296 | 304 | 200 | 202 | 238 | 250 |
| 01rbl.180 | 137 | 137 | 76 | 76 | 144 | 152 | 230 | 230 | 239 | 255 | 298 | 302 | 196 | 198 | 220 | 260 |
| 01rbl.185 | 135 | 137 | 72 | 76 | 144 | 160 | 224 | 238 | 245 | 251 | 296 | 300 | 200 | 202 | 238 | 240 |
| 01rbl.188 | 135 | 137 | 72 | 76 | 156 | 156 | 222 | 226 | 239 | 241 | 300 | 302 | 196 | 202 | 216 | 232 |
| 01rbl.189 | 137 | 137 | 76 | 78 | 144 | 156 | 234 | 254 | 237 | 239 | 300 | 302 | 204 | 204 | 222 | 236 |
| 01rbl.191 | 137 | 137 | 76 | 76 | 144 | 166 | 222 | 240 | 235 | 249 | 308 | 312 | 204 | 208 | 214 | 236 |
| 01rbl.193 | 135 | 137 | 76 | 76 | 156 | 168 | 224 | 230 | 239 | 241 | 300 | 300 | 200 | 208 | 220 | 236 |
| 01rbl.194 | 135 | 137 | 76 | 76 | 156 | 158 | 222 | 234 | 245 | 249 | 294 | 304 | 196 | 204 | 240 | 242 |
| 01rbl.195 | 137 | 137 | 76 | 76 | 144 | 152 | 226 | 232 | 247 | 247 | 298 | 298 | 202 | 208 | 230 | 244 |
| 01rbl.196 | 135 | 137 | 76 | 76 | 144 | 144 | 230 | 230 | 235 | 245 | 292 | 330 | 204 | 204 | 236 | 238 |
| 01rbl.197 | 137 | 137 | 76 | 76 | 156 | 180 | 224 | 232 | 247 | 249 | 296 | 334 | 180 | 200 | 212 | 238 |
| 01rbl.198 | 137 | 137 | 76 | 76 | 158 | 184 | 228 | 230 | 239 | 243 | 300 | 302 | 198 | 204 | 212 | 226 |
| 01rbl.207 | 137 | 137 | 76 | 76 | 170 | 170 | 230 | 238 | 241 | 251 | 296 | 302 | 204 | 206 | 222 | 238 |
| 01rbl.209 | 137 | 137 | 76 | 76 | 144 | 156 | 226 | 230 | 239 | 249 | 298 | 298 | 202 | 210 | 220 | 250 |
| 01rbl.211 | 137 | 137 | 76 | 76 | 144 | 144 | 238 | 248 | 249 | 251 | 298 | 298 | 180 | 204 | 220 | 222 |
| 01rbl.212 | 135 | 137 | 76 | 76 | 144 | 152 | 222 | 222 | 237 | 249 | 298 | 304 | 196 | 206 | 220 | 226 |
| 01rbl.213 | 137 | 137 | 76 | 76 | 156 | 156 | 224 | 234 | 245 | 251 | 292 | 302 | 200 | 202 | 236 | 238 |

|           |     |     |    |    |     |     |     |     |     |     |     |     |     |     |     |     |
|-----------|-----|-----|----|----|-----|-----|-----|-----|-----|-----|-----|-----|-----|-----|-----|-----|
| 01rbl.214 | 135 | 137 | 76 | 76 | 144 | 156 | 222 | 230 | 249 | 249 | 298 | 300 | 204 | 204 | 212 | 254 |
| 01rbl.215 | 137 | 137 | 76 | 76 | 144 | 152 | 222 | 224 | 245 | 249 | 286 | 296 | 200 | 202 | 236 | 238 |
| 01rbl.216 | 137 | 137 | 76 | 76 | 152 | 160 | 222 | 230 | 247 | 247 | 298 | 298 | 198 | 202 | 238 | 238 |
| 01rbl.217 | 137 | 137 | 76 | 76 | 144 | 174 | 236 | 248 | 245 | 247 | 296 | 308 | 160 | 202 | 192 | 222 |
| 01rbl.218 | 135 | 137 | 76 | 76 | 156 | 156 | 224 | 232 | 245 | 247 | 296 | 298 | 200 | 206 | 234 | 242 |
| 01rbl.220 | 137 | 137 | 76 | 76 | 156 | 164 | 232 | 242 | 247 | 251 | 298 | 302 | 202 | 204 | 212 | 254 |
| 01rbl.221 | 135 | 137 | 76 | 76 | 144 | 156 | 248 | 248 | 239 | 249 | 298 | 304 | 202 | 204 | 212 | 222 |
| 01rbl.223 | 137 | 137 | 76 | 76 | 144 | 144 | 222 | 232 | 247 | 249 | 294 | 304 | 200 | 202 | 220 | 220 |
| 01rbl.224 | 137 | 137 | 76 | 76 | 144 | 154 | 224 | 224 | 239 | 247 | 302 | 304 | 198 | 198 | 228 | 232 |
| 01rbl.225 | 137 | 137 | 74 | 76 | 152 | 158 | 212 | 244 | 237 | 237 | 304 | 306 | 160 | 204 | 216 | 228 |
| 01rbl.232 | 135 | 135 | 76 | 76 | 144 | 156 | 226 | 242 | 247 | 251 | 304 | 304 | 160 | 204 | 228 | 248 |
| 02rbl.002 | 137 | 137 | 76 | 76 | 144 | 158 | 222 | 244 | 239 | 245 | 294 | 300 | 196 | 202 | 234 | 236 |
| 02rbl.003 | 137 | 137 | 76 | 76 | 144 | 144 | 224 | 236 | 245 | 245 | 294 | 298 | 200 | 202 | 220 | 220 |
| 02rbl.004 | 137 | 137 | 76 | 76 | 144 | 158 | 222 | 226 | 245 | 251 | 292 | 306 | 200 | 202 | 226 | 248 |
| 02rbl.008 | 137 | 137 | 76 | 76 | 162 | 162 | 230 | 234 | 237 | 251 | 300 | 302 | 198 | 202 | 242 | 250 |
| 02rbl.011 | 137 | 137 | 76 | 76 | 144 | 152 | 228 | 240 | 237 | 245 | 294 | 302 | 196 | 198 | 220 | 230 |
| 02rbl.012 | 137 | 137 | 76 | 76 | 144 | 144 | 222 | 232 | 247 | 249 | 298 | 300 | 196 | 198 | 220 | 226 |
| 02rbl.014 | 137 | 137 | 76 | 76 | 156 | 156 | 238 | 248 | 251 | 251 | 294 | 314 | 200 | 200 | 216 | 236 |
| 02rbl.016 | 137 | 137 | 76 | 76 | 156 | 172 | 232 | 240 | 239 | 247 | 298 | 300 | 160 | 202 | 228 | 236 |
| 02rbl.018 | 137 | 137 | 76 | 76 | 144 | 156 | 238 | 242 | 239 | 249 | 294 | 296 | 196 | 208 | 218 | 232 |
| 02rbl.019 | 137 | 137 | 76 | 76 | 144 | 144 | 222 | 232 | 247 | 247 | 298 | 320 | 196 | 198 | 220 | 236 |
| 02rbl.020 | 137 | 137 | 76 | 76 | 144 | 154 | 222 | 224 | 239 | 247 | 270 | 298 | 198 | 200 | 222 | 236 |
| 02rbl.024 | 137 | 137 | 76 | 76 | 144 | 162 | 214 | 232 | 247 | 251 | 294 | 300 | 160 | 200 | 234 | 250 |
| 02rbl.025 | 135 | 137 | 76 | 76 | 144 | 154 | 228 | 234 | 245 | 245 | 292 | 302 | 196 | 198 | 216 | 220 |
| 02rbl.030 | 135 | 137 | 76 | 76 | 144 | 174 | 230 | 242 | 247 | 247 | 292 | 296 | 200 | 202 | 226 | 226 |
| 02rbl.032 | 135 | 137 | 76 | 78 | 144 | 158 | 224 | 224 | 235 | 247 | 300 | 302 | 196 | 200 | 228 | 236 |
| 02rbl.033 | 137 | 137 | 76 | 76 | 144 | 164 | 228 | 230 | 239 | 251 | 298 | 300 | 196 | 200 | 218 | 244 |
| 02rbl.038 | 137 | 137 | 76 | 78 | 144 | 144 | 222 | 236 | 245 | 245 | 296 | 304 | 200 | 210 | 228 | 228 |
| 02rbl.039 | 137 | 137 | 76 | 76 | 144 | 156 | 230 | 248 | 239 | 245 | 296 | 302 | 202 | 204 | 242 | 250 |
| 02rbl.043 | 137 | 137 | 76 | 76 | 144 | 156 | 228 | 230 | 239 | 239 | 306 | 318 | 198 | 200 | 234 | 238 |
| 02rbl.048 | 135 | 137 | 76 | 76 | 144 | 158 | 238 | 238 | 247 | 247 | 302 | 302 | 160 | 204 | 234 | 238 |
| 02rbl.053 | 137 | 137 | 76 | 76 | 144 | 172 | 230 | 236 | 245 | 249 | 300 | 306 | 196 | 210 | 228 | 234 |
| 02rbl.061 | 137 | 137 | 76 | 76 | 144 | 156 | 222 | 242 | 239 | 249 | 302 | 302 | 200 | 200 | 224 | 242 |
| 02rbl.062 | 137 | 137 | 76 | 76 | 144 | 164 | 220 | 224 | 241 | 247 | 298 | 308 | 200 | 204 | 220 | 236 |
| 02rbl.067 | 135 | 137 | 76 | 76 | 144 | 176 | 236 | 242 | 237 | 247 | 292 | 302 | 196 | 196 | 214 | 234 |
| 02rbl.068 | 137 | 137 | 76 | 76 | 144 | 166 | 222 | 226 | 245 | 245 | 294 | 300 | 196 | 204 | 218 | 234 |
| 02rbl.071 | 137 | 137 | 76 | 78 | 144 | 156 | 230 | 240 | 249 | 251 | 296 | 300 | 198 | 202 | 192 | 234 |

|           |     |     |    |    |     |     |     |     |     |     |     |     |     |     |     |     |
|-----------|-----|-----|----|----|-----|-----|-----|-----|-----|-----|-----|-----|-----|-----|-----|-----|
| 02rbl.072 | 135 | 137 | 76 | 76 | 144 | 144 | 224 | 242 | 245 | 245 | 290 | 300 | 196 | 204 | 218 | 234 |
| 02rbl.078 | 137 | 137 | 76 | 76 | 144 | 160 | 220 | 230 | 247 | 247 | 302 | 302 | 198 | 198 | 240 | 252 |
| 02rbl.083 | 137 | 137 | 76 | 76 | 158 | 170 | 220 | 224 | 235 | 245 | 302 | 306 | 192 | 200 | 218 | 236 |
| 02rbl.086 | 137 | 137 | 74 | 76 | 158 | 174 | 228 | 240 | 247 | 247 | 298 | 306 | 194 | 202 | 216 | 220 |
| 02rbl.088 | 137 | 137 | 76 | 76 | 144 | 144 | 222 | 222 | 235 | 239 | 300 | 312 | 198 | 204 | 222 | 234 |
| 02rbl.093 | 135 | 135 | 76 | 78 | 144 | 144 | 226 | 230 | 239 | 247 | 292 | 306 | 196 | 210 | 214 | 238 |
| 02rbl.095 | 137 | 137 | 76 | 76 | 144 | 144 | 228 | 230 | 247 | 253 | 294 | 304 | 198 | 200 | 194 | 218 |
| 02rbl.100 | 137 | 137 | 76 | 78 | 144 | 144 | 224 | 228 | 247 | 249 | 294 | 302 | 198 | 200 | 214 | 236 |
| 02rbl.102 | 137 | 137 | 76 | 76 | 144 | 144 | 222 | 222 | 249 | 251 | 300 | 300 | 196 | 202 | 234 | 236 |
| 02rbl.107 | 135 | 137 | 76 | 76 | 144 | 144 | 224 | 236 | 235 | 247 | 294 | 294 | 200 | 202 | 192 | 248 |
| 02rbl.108 | 137 | 137 | 76 | 76 | 144 | 164 | 226 | 232 | 245 | 249 | 300 | 304 | 200 | 202 | 224 | 244 |
| 02rbl.114 | 137 | 137 | 76 | 76 | 144 | 144 | 224 | 224 | 245 | 249 | 294 | 298 | 198 | 202 | 222 | 222 |
| 02rbl.117 | 137 | 137 | 76 | 76 | 144 | 156 | 228 | 230 | 235 | 251 | 300 | 302 | 196 | 200 | 238 | 240 |
| 02rbl.121 | 135 | 137 | 76 | 76 | 156 | 164 | 232 | 232 | 249 | 251 | 294 | 300 | 196 | 202 | 218 | 236 |
| 02rbl.126 | 137 | 137 | 76 | 76 | 144 | 154 | 220 | 230 | 239 | 253 | 296 | 300 | 202 | 202 | 192 | 236 |
| 02rbl.128 | 137 | 137 | 76 | 76 | 144 | 144 | 230 | 238 | 245 | 249 | 302 | 302 | 200 | 204 | 230 | 240 |
| 02rbl.132 | 137 | 137 | 76 | 76 | 144 | 158 | 222 | 230 | 245 | 249 | 292 | 298 | 196 | 202 | 234 | 252 |
| 02rbl.133 | 135 | 137 | 76 | 76 | 144 | 144 | 224 | 244 | 247 | 249 | 296 | 306 | 194 | 200 | 220 | 226 |
| 02rbl.137 | 137 | 137 | 76 | 76 | 160 | 174 | 238 | 238 | 247 | 247 | 296 | 302 | 194 | 204 | 220 | 234 |
| 02rbl.140 | 137 | 137 | 76 | 76 | 144 | 144 | 222 | 230 | 249 | 251 | 292 | 310 | 196 | 200 | 234 | 254 |
| 02rbl.142 | 137 | 137 | 76 | 76 | 156 | 176 | 240 | 244 | 245 | 249 | 298 | 302 | 200 | 200 | 220 | 236 |
| 02rbl.146 | 137 | 137 | 76 | 76 | 156 | 172 | 222 | 230 | 247 | 251 | 296 | 298 | 196 | 202 | 234 | 238 |
| 02rbl.149 | 137 | 137 | 76 | 76 | 144 | 154 | 222 | 240 | 239 | 251 | 292 | 304 | 200 | 202 | 228 | 236 |
| 02rbl.152 | 137 | 137 | 74 | 76 | 140 | 144 | 224 | 242 | 239 | 245 | 288 | 306 | 200 | 202 | 232 | 236 |
| 02rbl.153 | 137 | 137 | 76 | 76 | 144 | 156 | 224 | 248 | 247 | 249 | 296 | 304 | 198 | 200 | 238 | 250 |
| 02rbl.157 | 137 | 137 | 72 | 76 | 144 | 152 | 222 | 226 | 245 | 249 | 300 | 302 | 196 | 198 | 220 | 250 |
| 02rbl.159 | 137 | 137 | 76 | 78 | 144 | 158 | 224 | 230 | 251 | 253 | 298 | 302 | 160 | 202 | 230 | 234 |
| 02rbl.161 | 135 | 137 | 76 | 76 | 144 | 156 | 222 | 226 | 239 | 247 | 294 | 298 | 200 | 200 | 214 | 234 |
| 02rbl.163 | 137 | 137 | 76 | 76 | 144 | 144 | 222 | 230 | 239 | 245 | 306 | 330 | 200 | 202 | 230 | 236 |
| 02rbl.164 | 137 | 137 | 76 | 78 | 154 | 176 | 232 | 238 | 245 | 249 | 292 | 298 | 196 | 200 | 236 | 238 |
| 02rbl.165 | 137 | 137 | 76 | 76 | 144 | 180 | 226 | 240 | 239 | 247 | 294 | 296 | 198 | 202 | 192 | 212 |
| 02rbl.172 | 137 | 137 | 76 | 76 | 156 | 158 | 232 | 234 | 245 | 249 | 292 | 302 | 196 | 196 | 226 | 234 |
| 02rbl.173 | 137 | 137 | 76 | 76 | 144 | 158 | 222 | 230 | 245 | 247 | 298 | 300 | 200 | 200 | 230 | 234 |
| 02rbl.180 | 137 | 137 | 76 | 76 | 188 | 188 | 230 | 230 | 245 | 245 | 288 | 298 | 200 | 206 | 218 | 238 |
| 02rbl.184 | 135 | 137 | 76 | 76 | 144 | 156 | 230 | 230 | 247 | 249 | 296 | 300 | 200 | 202 | 212 | 220 |
| 02rbl.185 | 137 | 137 | 76 | 76 | 144 | 156 | 226 | 260 | 247 | 249 | 292 | 292 | 196 | 198 | 234 | 238 |
| 02rbl.186 | 135 | 137 | 76 | 76 | 152 | 156 | 224 | 230 | 237 | 247 | 294 | 302 | 202 | 204 | 220 | 238 |

|           |     |     |    |    |     |     |     |     |     |     |     |     |     |     |     |     |
|-----------|-----|-----|----|----|-----|-----|-----|-----|-----|-----|-----|-----|-----|-----|-----|-----|
| 02rbl.188 | 137 | 137 | 76 | 76 | 144 | 144 | 224 | 238 | 239 | 247 | 294 | 296 | 202 | 206 | 224 | 236 |
| 02rbl.192 | 135 | 137 | 76 | 76 | 156 | 158 | 212 | 248 | 239 | 239 | 300 | 306 | 196 | 202 | 220 | 238 |
| 02rbl.197 | 137 | 137 | 76 | 76 | 144 | 156 | 226 | 236 | 247 | 249 | 298 | 298 | 200 | 202 | 220 | 234 |
| 02rbl.201 | 137 | 137 | 76 | 78 | 144 | 156 | 230 | 244 | 239 | 245 | 296 | 304 | 202 | 210 | 230 | 242 |
| 02rbl.210 | 137 | 137 | 76 | 76 | 144 | 164 | 240 | 242 | 239 | 247 | 302 | 302 | 160 | 200 | 226 | 236 |
| 02rbl.212 | 135 | 137 | 76 | 76 | 144 | 164 | 240 | 248 | 247 | 251 | 314 | 330 | 200 | 206 | 238 | 254 |
| 02rbl.214 | 137 | 137 | 76 | 76 | 144 | 156 | 220 | 262 | 239 | 247 | 292 | 304 | 202 | 202 | 246 | 250 |
| 02rbl.215 | 137 | 137 | 76 | 76 | 156 | 156 | 236 | 248 | 247 | 251 | 302 | 310 | 200 | 200 | 240 | 242 |
| 02rbl.216 | 137 | 137 | 76 | 76 | 144 | 144 | 226 | 228 | 237 | 245 | 300 | 302 | 196 | 196 | 220 | 230 |
| 02rbl.217 | 137 | 137 | 74 | 76 | 152 | 156 | 214 | 240 | 239 | 245 | 298 | 300 | 198 | 202 | 234 | 240 |
| 02rbl.223 | 137 | 137 | 76 | 76 | 144 | 156 | 224 | 240 | 245 | 249 | 294 | 312 | 200 | 208 | 232 | 254 |
| 02rbl.226 | 137 | 137 | 76 | 76 | 144 | 188 | 226 | 232 | 241 | 251 | 296 | 306 | 200 | 202 | 228 | 240 |
| 02rbl.229 | 137 | 137 | 76 | 76 | 144 | 144 | 234 | 234 | 235 | 243 | 300 | 302 | 196 | 200 | 192 | 234 |
| 02rbl.230 | 135 | 137 | 74 | 76 | 144 | 156 | 232 | 246 | 247 | 251 | 306 | 310 | 202 | 202 | 234 | 234 |
| 02rbl.235 | 135 | 137 | 76 | 76 | 144 | 156 | 224 | 236 | 249 | 249 | 300 | 302 | 196 | 200 | 238 | 254 |
| 02rbl.236 | 135 | 137 | 74 | 76 | 144 | 158 | 220 | 242 | 241 | 249 | 300 | 302 | 202 | 202 | 220 | 240 |
| 02rbl.237 | 135 | 137 | 74 | 76 | 144 | 184 | 230 | 230 | 237 | 239 | 300 | 302 | 202 | 204 | 230 | 234 |
| 02rbl.242 | 137 | 137 | 76 | 76 | 144 | 162 | 214 | 232 | 247 | 247 | 298 | 302 | 160 | 198 | 212 | 258 |
| 02rbl.243 | 137 | 137 | 76 | 76 | 156 | 158 | 214 | 220 | 241 | 247 | 302 | 302 | 160 | 200 | 212 | 216 |
| 02rbl.246 | 137 | 137 | 76 | 76 | 144 | 156 | 224 | 238 | 247 | 249 | 292 | 298 | 200 | 210 | 232 | 236 |
| 02rbl.252 | 135 | 137 | 76 | 76 | 144 | 152 | 234 | 234 | 239 | 255 | 298 | 300 | 196 | 204 | 234 | 260 |
| 02rbl.253 | 135 | 137 | 76 | 76 | 152 | 162 | 212 | 232 | 241 | 249 | 284 | 296 | 200 | 202 | 228 | 254 |
| 02rbl.254 | 137 | 137 | 76 | 76 | 144 | 158 | 214 | 224 | 247 | 247 | 294 | 298 | 196 | 204 | 212 | 220 |
| 02rbl.255 | 135 | 137 | 76 | 76 | 156 | 158 | 224 | 232 | 239 | 253 | 296 | 298 | 202 | 206 | 240 | 250 |
| 02rbl.260 | 135 | 137 | 74 | 76 | 144 | 144 | 222 | 224 | 239 | 239 | 296 | 302 | 202 | 204 | 230 | 234 |
| 02rbl.261 | 135 | 135 | 76 | 78 | 144 | 164 | 240 | 240 | 245 | 247 | 300 | 314 | 194 | 202 | 192 | 254 |
| 02rbl.264 | 137 | 137 | 76 | 76 | 144 | 146 | 224 | 224 | 237 | 245 | 296 | 306 | 196 | 196 | 218 | 240 |
| 02rbl.265 | 137 | 137 | 72 | 76 | 144 | 156 | 228 | 238 | 241 | 241 | 300 | 302 | 200 | 202 | 234 | 238 |
| 02rbl.267 | 137 | 137 | 76 | 76 | 144 | 156 | 224 | 238 | 237 | 245 | 294 | 304 | 200 | 202 | 230 | 238 |
| 02rbl.268 | 137 | 137 | 76 | 76 | 144 | 152 | 224 | 248 | 239 | 247 | 286 | 296 | 200 | 200 | 218 | 240 |
| 02rbl.271 | 137 | 137 | 76 | 76 | 144 | 144 | 238 | 240 | 241 | 245 | 298 | 302 | 200 | 204 | 226 | 238 |
| 02rbl.274 | 137 | 137 | 76 | 76 | 154 | 162 | 222 | 230 | 247 | 249 | 298 | 302 | 198 | 204 | 232 | 238 |
| 02rbl.277 | 137 | 137 | 76 | 76 | 144 | 144 | 230 | 230 | 241 | 245 | 302 | 318 | 200 | 202 | 216 | 246 |
| 02rbl.278 | 137 | 137 | 76 | 76 | 144 | 144 | 230 | 230 | 239 | 251 | 296 | 300 | 160 | 204 | 226 | 232 |
| 02rbl.279 | 137 | 137 | 76 | 76 | 156 | 162 | 230 | 248 | 239 | 247 | 300 | 302 | 200 | 206 | 192 | 236 |
| 02rbl.291 | 137 | 137 | 76 | 76 | 144 | 162 | 224 | 246 | 239 | 245 | 298 | 302 | 202 | 206 | 234 | 238 |
| 02rbl.295 | 137 | 137 | 76 | 76 | 144 | 144 | 224 | 230 | 235 | 251 | 296 | 300 | 206 | 208 | 194 | 234 |

|           |     |     |    |    |     |     |     |     |     |     |     |     |     |     |     |     |
|-----------|-----|-----|----|----|-----|-----|-----|-----|-----|-----|-----|-----|-----|-----|-----|-----|
| 02rbl.300 | 137 | 137 | 76 | 76 | 156 | 156 | 230 | 230 | 239 | 245 | 300 | 302 | 196 | 206 | 220 | 234 |
| 02rbl.304 | 135 | 137 | 76 | 76 | 144 | 164 | 224 | 236 | 245 | 247 | 300 | 302 | 202 | 204 | 240 | 252 |
| 02rbl.306 | 137 | 137 | 76 | 76 | 144 | 156 | 224 | 230 | 235 | 239 | 300 | 304 | 204 | 204 | 218 | 226 |
| 02rbl.307 | 135 | 137 | 76 | 76 | 152 | 156 | 224 | 240 | 239 | 245 | 296 | 306 | 202 | 206 | 216 | 220 |
| 02rbl.311 | 135 | 137 | 76 | 76 | 156 | 162 | 234 | 246 | 245 | 247 | 292 | 296 | 200 | 202 | 216 | 238 |
| 02rbl.319 | 137 | 137 | 72 | 76 | 144 | 174 | 222 | 222 | 239 | 245 | 296 | 304 | 196 | 208 | 192 | 236 |
| 02rbl.323 | 137 | 137 | 76 | 76 | 144 | 188 | 230 | 238 | 247 | 251 | 292 | 302 | 160 | 198 | 238 | 240 |
| 02rbl.327 | 135 | 137 | 72 | 78 | 156 | 156 | 224 | 240 | 245 | 245 | 296 | 300 | 200 | 202 | 232 | 234 |
| 02rbl.328 | 137 | 137 | 76 | 76 | 144 | 156 | 224 | 224 | 239 | 245 | 270 | 296 | 198 | 200 | 192 | 236 |
| 02rbl.330 | 135 | 137 | 76 | 78 | 144 | 156 | 230 | 238 | 235 | 245 | 302 | 302 | 200 | 202 | 238 | 266 |
| 02rbl.335 | 137 | 137 | 76 | 76 | 144 | 144 | 224 | 232 | 239 | 247 | 298 | 302 | 196 | 200 | 194 | 238 |
| 02rbl.337 | 137 | 137 | 76 | 76 | 144 | 144 | 230 | 238 | 237 | 239 | 298 | 306 | 202 | 206 | 238 | 248 |
| 02rbl.338 | 137 | 137 | 76 | 76 | 144 | 156 | 222 | 224 | 239 | 245 | 296 | 296 | 200 | 202 | 232 | 232 |
| 02rbl.339 | 137 | 137 | 76 | 76 | 144 | 156 | 230 | 240 | 237 | 239 | 294 | 300 | 202 | 206 | 220 | 234 |
| 02rbl.340 | 135 | 137 | 76 | 76 | 164 | 176 | 230 | 230 | 235 | 239 | 294 | 300 | 200 | 202 | 192 | 218 |
| 02rbl.341 | 135 | 137 | 76 | 76 | 144 | 144 | 228 | 230 | 245 | 249 | 294 | 300 | 200 | 200 | 234 | 250 |
| 02rbl.345 | 137 | 137 | 76 | 76 | 144 | 156 | 220 | 240 | 249 | 255 | 296 | 302 | 160 | 200 | 230 | 254 |
| 02rbl.350 | 137 | 137 | 76 | 76 | 156 | 162 | 234 | 240 | 249 | 249 | 302 | 310 | 200 | 200 | 214 | 220 |
| 02rbl.351 | 135 | 135 | 76 | 76 | 144 | 144 | 238 | 242 | 239 | 241 | 298 | 302 | 196 | 200 | 220 | 236 |
| 02rbl.353 | 137 | 137 | 76 | 76 | 144 | 156 | 222 | 230 | 239 | 247 | 292 | 294 | 202 | 204 | 212 | 220 |
| 03rbl.001 | 137 | 137 | 76 | 76 | 144 | 162 | 214 | 224 | 249 | 249 | 294 | 298 | 200 | 200 | 236 | 236 |
| 03rbl.005 | 137 | 137 | 76 | 76 | 144 | 144 | 214 | 226 | 249 | 251 | 304 | 304 | 202 | 202 | 230 | 230 |
| 03rbl.006 | 137 | 137 | 76 | 76 | 154 | 176 | 220 | 224 | 247 | 249 | 298 | 304 | 200 | 202 | 222 | 226 |
| 03rbl.015 | 137 | 137 | 76 | 76 | 144 | 156 | 226 | 230 | 249 | 251 | 294 | 296 | 198 | 204 | 240 | 246 |
| 03rbl.016 | 137 | 137 | 76 | 76 | 144 | 184 | 224 | 240 | 239 | 247 | 300 | 302 | 200 | 202 | 236 | 242 |
| 03rbl.019 | 135 | 137 | 76 | 76 | 156 | 156 | 226 | 230 | 249 | 251 | 300 | 300 | 198 | 202 | 234 | 240 |
| 03rbl.023 | 135 | 137 | 76 | 78 | 144 | 144 | 224 | 234 | 247 | 249 | 298 | 304 | 200 | 208 | 220 | 238 |
| 03rbl.026 | 137 | 137 | 76 | 78 | 144 | 144 | 226 | 230 | 245 | 249 | 300 | 304 | 202 | 204 | 224 | 238 |
| 03rbl.027 | 137 | 137 | 76 | 76 | 144 | 156 | 222 | 222 | 245 | 249 | 304 | 308 | 204 | 204 | 238 | 252 |
| 03rbl.029 | 137 | 137 | 76 | 76 | 144 | 162 | 224 | 238 | 249 | 249 | 298 | 298 | 204 | 204 | 190 | 232 |
| 03rbl.030 | 137 | 137 | 76 | 76 | 144 | 144 | 224 | 224 | 237 | 249 | 302 | 304 | 202 | 202 | 234 | 252 |
| 03rbl.031 | 137 | 137 | 76 | 76 | 144 | 144 | 224 | 230 | 239 | 247 | 300 | 304 | 192 | 202 | 220 | 234 |
| 03rbl.032 | 137 | 137 | 76 | 76 | 156 | 158 | 222 | 222 | 239 | 245 | 296 | 308 | 200 | 202 | 220 | 220 |
| 03rbl.033 | 137 | 137 | 76 | 78 | 144 | 144 | 214 | 238 | 245 | 253 | 302 | 304 | 202 | 206 | 220 | 226 |
| 03rbl.034 | 137 | 137 | 76 | 76 | 152 | 158 | 222 | 230 | 241 | 251 | 300 | 304 | 200 | 202 | 236 | 250 |
| 03rbl.035 | 135 | 137 | 76 | 76 | 144 | 144 | 220 | 236 | 239 | 257 | 298 | 308 | 206 | 212 | 216 | 222 |
| 03rbl.038 | 137 | 137 | 76 | 76 | 158 | 158 | 224 | 230 | 239 | 243 | 296 | 304 | 196 | 202 | 228 | 240 |

|           |     |     |    |    |     |     |     |     |     |     |     |     |     |     |     |     |
|-----------|-----|-----|----|----|-----|-----|-----|-----|-----|-----|-----|-----|-----|-----|-----|-----|
| 03rbl.039 | 137 | 137 | 76 | 76 | 144 | 158 | 224 | 224 | 245 | 249 | 302 | 302 | 204 | 204 | 220 | 240 |
| 03rbl.041 | 137 | 137 | 76 | 76 | 152 | 158 | 228 | 228 | 243 | 245 | 296 | 302 | 196 | 202 | 216 | 224 |
| 03rbl.042 | 137 | 137 | 76 | 76 | 144 | 144 | 230 | 264 | 249 | 249 | 296 | 298 | 196 | 206 | 234 | 238 |
| 03rbl.043 | 135 | 137 | 76 | 76 | 144 | 184 | 222 | 230 | 239 | 239 | 296 | 298 | 202 | 202 | 212 | 232 |
| 03rbl.044 | 135 | 137 | 76 | 76 | 144 | 176 | 226 | 246 | 245 | 249 | 298 | 302 | 198 | 204 | 220 | 242 |
| 03rbl.046 | 135 | 137 | 76 | 76 | 162 | 180 | 230 | 230 | 239 | 245 | 300 | 308 | 196 | 200 | 236 | 270 |
| 03rbl.049 | 137 | 137 | 76 | 76 | 156 | 156 | 224 | 226 | 245 | 245 | 296 | 302 | 198 | 200 | 218 | 220 |
| 03rbl.050 | 137 | 137 | 76 | 76 | 156 | 156 | 232 | 232 | 245 | 249 | 294 | 306 | 202 | 202 | 222 | 238 |
| 03rbl.053 | 137 | 137 | 76 | 76 | 144 | 154 | 224 | 230 | 239 | 247 | 294 | 296 | 202 | 204 | 212 | 236 |
| 03rbl.054 | 137 | 137 | 76 | 78 | 144 | 174 | 214 | 238 | 237 | 249 | 298 | 302 | 194 | 198 | 220 | 234 |
| 03rbl.057 | 137 | 137 | 76 | 76 | 144 | 144 | 234 | 236 | 235 | 251 | 274 | 308 | 160 | 198 | 236 | 238 |
| 03rbl.058 | 137 | 137 | 76 | 76 | 144 | 144 | 230 | 238 | 245 | 247 | 298 | 302 | 202 | 206 | 250 | 252 |
| 03rbl.059 | 137 | 137 | 76 | 76 | 144 | 144 | 222 | 234 | 239 | 251 | 302 | 306 | 200 | 200 | 230 | 250 |
| 03rbl.063 | 137 | 137 | 76 | 76 | 144 | 156 | 230 | 234 | 241 | 255 | 296 | 302 | 200 | 202 | 192 | 236 |
| 03rbl.069 | 137 | 137 | 76 | 76 | 150 | 156 | 224 | 224 | 249 | 251 | 302 | 304 | 196 | 200 | 198 | 234 |
| 03rbl.070 | 137 | 137 | 76 | 78 | 144 | 156 | 222 | 224 | 239 | 241 | 298 | 300 | 198 | 204 | 226 | 254 |
| 03rbl.071 | 137 | 137 | 76 | 76 | 164 | 176 | 230 | 236 | 235 | 245 | 292 | 296 | 196 | 210 | 234 | 234 |
| 03rbl.072 | 137 | 137 | 76 | 78 | 144 | 198 | 224 | 236 | 249 | 249 | 290 | 298 | 196 | 206 | 222 | 234 |
| 03rbl.076 | 137 | 137 | 76 | 76 | 144 | 144 | 224 | 230 | 241 | 245 | 296 | 302 | 160 | 202 | 212 | 234 |
| 03rbl.082 | 135 | 137 | 76 | 76 | 156 | 164 | 224 | 230 | 247 | 249 | 298 | 312 | 194 | 200 | 236 | 256 |
| 03rbl.086 | 137 | 137 | 76 | 76 | 144 | 168 | 218 | 238 | 249 | 251 | 294 | 296 | 202 | 204 | 222 | 254 |
| 03rbl.089 | 137 | 137 | 76 | 76 | 156 | 160 | 222 | 238 | 249 | 251 | 298 | 300 | 160 | 202 | 222 | 242 |
| 03rbl.091 | 137 | 137 | 76 | 78 | 144 | 156 | 230 | 230 | 247 | 247 | 296 | 302 | 200 | 202 | 236 | 236 |
| 03rbl.093 | 135 | 137 | 76 | 76 | 144 | 156 | 224 | 246 | 239 | 247 | 302 | 302 | 202 | 204 | 222 | 238 |
| 03rbl.105 | 137 | 137 | 76 | 76 | 156 | 180 | 232 | 248 | 247 | 251 | 296 | 306 | 202 | 210 | 238 | 242 |
| 03rbl.106 | 137 | 137 | 76 | 76 | 158 | 158 | 222 | 248 | 241 | 245 | 296 | 304 | 198 | 202 | 240 | 242 |
| 03rbl.108 | 137 | 137 | 76 | 76 | 144 | 158 | 224 | 232 | 245 | 255 | 296 | 310 | 200 | 204 | 222 | 236 |
| 03rbl.112 | 137 | 137 | 76 | 76 | 144 | 144 | 232 | 248 | 249 | 251 | 296 | 300 | 202 | 212 | 224 | 236 |
| 03rbl.114 | 137 | 137 | 76 | 76 | 144 | 156 | 228 | 230 | 241 | 253 | 296 | 308 | 202 | 206 | 220 | 238 |
| 03rbl.115 | 137 | 137 | 76 | 76 | 156 | 158 | 232 | 238 | 249 | 255 | 296 | 300 | 202 | 206 | 220 | 238 |
| 03rbl.116 | 137 | 137 | 76 | 76 | 180 | 180 | 224 | 232 | 245 | 249 | 296 | 300 | 196 | 202 | 236 | 240 |
| 03rbl.122 | 135 | 137 | 76 | 76 | 152 | 180 | 224 | 232 | 245 | 255 | 296 | 306 | 196 | 202 | 238 | 246 |
| 03rbl.124 | 137 | 137 | 74 | 76 | 154 | 180 | 232 | 232 | 245 | 255 | 300 | 302 | 160 | 202 | 192 | 238 |
| 03rbl.137 | 135 | 137 | 76 | 76 | 156 | 176 | 226 | 236 | 245 | 249 | 296 | 296 | 198 | 198 | 212 | 218 |
| 03rbl.138 | 135 | 137 | 76 | 76 | 144 | 144 | 224 | 244 | 247 | 249 | 298 | 302 | 204 | 204 | 216 | 242 |
| 03rbl.140 | 137 | 137 | 76 | 76 | 144 | 158 | 222 | 250 | 237 | 249 | 294 | 306 | 204 | 206 | 216 | 240 |
| 03rbl.142 | 137 | 137 | 76 | 76 | 144 | 156 | 234 | 250 | 247 | 249 | 296 | 304 | 200 | 206 | 216 | 220 |

|           |     |     |    |    |     |     |     |     |     |     |     |     |     |     |     |     |
|-----------|-----|-----|----|----|-----|-----|-----|-----|-----|-----|-----|-----|-----|-----|-----|-----|
| 03rbl.145 | 137 | 137 | 76 | 76 | 144 | 170 | 224 | 234 | 247 | 253 | 300 | 302 | 200 | 202 | 234 | 242 |
| 03rbl.146 | 137 | 137 | 76 | 76 | 144 | 144 | 216 | 242 | 247 | 249 | 298 | 300 | 204 | 212 | 192 | 236 |
| 03rbl.149 | 137 | 137 | 76 | 76 | 156 | 156 | 230 | 242 | 249 | 251 | 300 | 306 | 200 | 204 | 220 | 236 |
| 03rbl.150 | 135 | 137 | 74 | 76 | 144 | 156 | 216 | 228 | 241 | 249 | 304 | 308 | 204 | 206 | 234 | 258 |
| 03rbl.156 | 135 | 137 | 76 | 76 | 144 | 168 | 228 | 238 | 241 | 249 | 288 | 300 | 196 | 202 | 240 | 254 |
| 03rbl.157 | 137 | 137 | 76 | 76 | 156 | 156 | 240 | 244 | 249 | 251 | 300 | 300 | 200 | 210 | 236 | 238 |
| 03rbl.159 | 137 | 137 | 74 | 76 | 144 | 156 | 230 | 230 | 245 | 247 | 292 | 306 | 196 | 202 | 252 | 258 |
| 03rbl.160 | 137 | 137 | 76 | 76 | 144 | 156 | 224 | 224 | 245 | 249 | 298 | 306 | 202 | 206 | 220 | 222 |
| 03rbl.165 | 137 | 137 | 76 | 76 | 144 | 158 | 226 | 238 | 247 | 249 | 298 | 298 | 200 | 204 | 236 | 236 |
| 03rbl.167 | 135 | 137 | 76 | 76 | 144 | 160 | 234 | 238 | 239 | 247 | 292 | 298 | 204 | 206 | 192 | 220 |
| 03rbl.171 | 135 | 137 | 76 | 76 | 158 | 160 | 222 | 236 | 251 | 253 | 298 | 298 | 200 | 204 | 220 | 238 |
| 03rbl.173 | 135 | 137 | 76 | 76 | 144 | 158 | 222 | 230 | 239 | 255 | 298 | 302 | 192 | 200 | 240 | 248 |
| 03rbl.174 | 135 | 137 | 76 | 76 | 144 | 176 | 224 | 230 | 245 | 249 | 302 | 308 | 202 | 204 | 244 | 260 |
| 03rbl.176 | 135 | 135 | 76 | 76 | 144 | 144 | 222 | 230 | 237 | 247 | 298 | 308 | 206 | 208 | 228 | 236 |
| 03rbl.178 | 137 | 137 | 76 | 76 | 158 | 164 | 230 | 240 | 239 | 245 | 302 | 306 | 204 | 204 | 236 | 236 |
| 03rbl.179 | 137 | 137 | 76 | 78 | 152 | 164 | 224 | 230 | 241 | 251 | 304 | 304 | 204 | 206 | 220 | 220 |
| 03rbl.181 | 137 | 137 | 76 | 76 | 156 | 156 | 228 | 232 | 249 | 251 | 294 | 296 | 200 | 200 | 230 | 236 |
| 03rbl.185 | 137 | 137 | 76 | 78 | 144 | 144 | 234 | 240 | 249 | 251 | 296 | 298 | 160 | 200 | 218 | 220 |
| 03rbl.190 | 135 | 137 | 76 | 76 | 154 | 158 | 222 | 230 | 241 | 245 | 300 | 302 | 180 | 204 | 240 | 250 |
| 03rbl.192 | 137 | 137 | 76 | 76 | 144 | 156 | 238 | 240 | 241 | 249 | 302 | 306 | 206 | 208 | 238 | 252 |
| 03rbl.194 | 135 | 137 | 76 | 76 | 158 | 158 | 222 | 256 | 245 | 249 | 298 | 304 | 160 | 206 | 220 | 234 |
| 03rbl.196 | 135 | 137 | 76 | 76 | 144 | 144 | 230 | 240 | 241 | 251 | 300 | 304 | 204 | 206 | 228 | 250 |
| 03rbl.199 | 137 | 137 | 76 | 76 | 144 | 156 | 222 | 240 | 247 | 249 | 292 | 306 | 160 | 204 | 220 | 236 |
| 03rbl.209 | 137 | 137 | 76 | 76 | 156 | 176 | 214 | 222 | 241 | 249 | 300 | 304 | 200 | 206 | 220 | 220 |
| 03rbl.218 | 137 | 137 | 76 | 76 | 156 | 158 | 230 | 230 | 235 | 245 | 300 | 302 | 180 | 196 | 240 | 244 |
| 03rbl.220 | 135 | 137 | 76 | 76 | 144 | 144 | 224 | 232 | 235 | 247 | 298 | 302 | 200 | 202 | 220 | 220 |
| 03rbl.222 | 135 | 137 | 76 | 76 | 144 | 166 | 234 | 234 | 247 | 249 | 298 | 302 | 196 | 200 | 212 | 246 |
| 03rbl.224 | 135 | 137 | 76 | 78 | 144 | 144 | 214 | 234 | 235 | 249 | 296 | 302 | 196 | 202 | 220 | 232 |
| 03rbl.231 | 137 | 137 | 76 | 76 | 144 | 160 | 224 | 234 | 239 | 239 | 296 | 302 | 200 | 202 | 220 | 236 |
| 03rbl.232 | 137 | 137 | 76 | 78 | 164 | 166 | 230 | 232 | 247 | 249 | 296 | 298 | 196 | 200 | 212 | 246 |
| 03rbl.235 | 135 | 137 | 76 | 76 | 144 | 156 | 230 | 240 | 249 | 249 | 296 | 296 | 200 | 202 | 190 | 252 |
| 03rbl.236 | 137 | 137 | 76 | 76 | 144 | 144 | 232 | 238 | 247 | 249 | 296 | 298 | 196 | 200 | 198 | 220 |
| 03rbl.244 | 137 | 137 | 76 | 78 | 156 | 156 | 222 | 240 | 239 | 245 | 292 | 294 | 200 | 204 | 238 | 238 |
| 03rbl.250 | 137 | 137 | 76 | 76 | 144 | 144 | 240 | 242 | 247 | 249 | 296 | 300 | 202 | 204 | 220 | 254 |
| 03rbl.258 | 135 | 137 | 74 | 76 | 144 | 144 | 222 | 222 | 245 | 247 | 300 | 302 | 200 | 202 | 220 | 226 |
| 03rbl.259 | 137 | 137 | 76 | 76 | 144 | 156 | 226 | 236 | 245 | 249 | 294 | 302 | 160 | 202 | 218 | 230 |
| 03rbl.262 | 135 | 137 | 76 | 78 | 144 | 144 | 224 | 240 | 235 | 247 | 298 | 304 | 202 | 204 | 238 | 240 |



|           |     |     |    |    |     |     |     |     |     |     |     |     |     |     |     |     |
|-----------|-----|-----|----|----|-----|-----|-----|-----|-----|-----|-----|-----|-----|-----|-----|-----|
| 03rbl.264 | 135 | 137 | 76 | 76 | 144 | 156 | 230 | 238 | 237 | 249 | 296 | 300 | 160 | 202 | 240 | 240 |
| 03rbl.272 | 135 | 137 | 76 | 76 | 144 | 152 | 224 | 238 | 239 | 249 | 302 | 304 | 196 | 202 | 220 | 238 |
| 03rbl.273 | 137 | 137 | 76 | 78 | 152 | 156 | 220 | 224 | 245 | 249 | 296 | 300 | 200 | 214 | 192 | 254 |
| 03rbl.283 | 137 | 137 | 76 | 78 | 144 | 180 | 224 | 238 | 251 | 251 | 298 | 302 | 200 | 202 | 228 | 236 |
| 03rbl.284 | 137 | 137 | 76 | 76 | 156 | 156 | 232 | 232 | 249 | 255 | 302 | 302 | 200 | 210 | 234 | 234 |
| 03rbl.285 | 137 | 137 | 76 | 76 | 144 | 152 | 224 | 224 | 235 | 251 | 292 | 296 | 198 | 202 | 212 | 254 |
| 03rbl.294 | 135 | 135 | 74 | 76 | 152 | 162 | 212 | 230 | 247 | 247 | 298 | 312 | 200 | 200 | 226 | 238 |
| 03rbl.297 | 137 | 137 | 72 | 76 | 156 | 168 | 218 | 240 | 237 | 247 | 296 | 300 | 196 | 206 | 222 | 270 |
| 03rbl.298 | 137 | 137 | 76 | 76 | 144 | 156 | 222 | 234 | 243 | 249 | 296 | 302 | 196 | 200 | 224 | 240 |
| 03rbl.299 | 137 | 137 | 76 | 76 | 144 | 144 | 228 | 230 | 237 | 251 | 296 | 298 | 202 | 202 | 220 | 260 |
| 03rbl.305 | 135 | 137 | 76 | 76 | 152 | 156 | 220 | 238 | 249 | 249 | 296 | 300 | 160 | 200 | 228 | 254 |
| 03rbl.306 | 135 | 137 | 76 | 76 | 144 | 162 | 224 | 248 | 247 | 249 | 298 | 304 | 196 | 200 | 238 | 240 |
| 03rbl.307 | 137 | 137 | 76 | 76 | 156 | 160 | 224 | 234 | 241 | 251 | 300 | 302 | 202 | 202 | 212 | 238 |
| 03rbl.312 | 137 | 137 | 76 | 76 | 158 | 174 | 224 | 236 | 245 | 253 | 296 | 302 | 204 | 206 | 192 | 220 |
| 03rbl.316 | 137 | 137 | 76 | 76 | 156 | 162 | 220 | 224 | 239 | 247 | 294 | 298 | 198 | 202 | 192 | 220 |
| 03rbl.322 | 135 | 137 | 76 | 76 | 144 | 184 | 222 | 238 | 239 | 247 | 296 | 298 | 202 | 206 | 220 | 232 |
| 03rbl.325 | 135 | 137 | 76 | 76 | 144 | 158 | 226 | 232 | 247 | 249 | 292 | 292 | 160 | 202 | 214 | 256 |
| 03rbl.326 | 137 | 137 | 76 | 76 | 144 | 162 | 232 | 238 | 239 | 247 | 286 | 302 | 160 | 206 | 222 | 244 |
| 03rbl.327 | 137 | 137 | 76 | 78 | 144 | 174 | 224 | 240 | 251 | 253 | 296 | 302 | 180 | 206 | 234 | 242 |
| 03rbl.333 | 137 | 137 | 76 | 76 | 144 | 144 | 212 | 230 | 247 | 253 | 300 | 300 | 198 | 202 | 220 | 222 |
| 03rbl.334 | 135 | 137 | 76 | 76 | 144 | 188 | 230 | 248 | 245 | 251 | 296 | 300 | 200 | 206 | 192 | 242 |
| 03rbl.335 | 135 | 137 | 76 | 76 | 144 | 152 | 228 | 230 | 239 | 249 | 296 | 298 | 180 | 196 | 220 | 234 |
| 03rbl.337 | 137 | 137 | 76 | 76 | 154 | 156 | 224 | 234 | 235 | 245 | 294 | 302 | 160 | 198 | 220 | 240 |
| 03rbl.338 | 135 | 137 | 76 | 76 | 144 | 152 | 222 | 248 | 249 | 251 | 292 | 294 | 196 | 202 | 194 | 216 |
| 03rbl.340 | 135 | 137 | 76 | 76 | 156 | 156 | 230 | 238 | 239 | 255 | 296 | 300 | 202 | 206 | 230 | 232 |
| 03rbl.343 | 137 | 137 | 76 | 76 | 168 | 188 | 220 | 240 | 235 | 245 | 298 | 308 | 204 | 208 | 214 | 242 |
| 03rbl.349 | 137 | 137 | 76 | 76 | 144 | 156 | 224 | 226 | 247 | 249 | 300 | 306 | 200 | 204 | 230 | 236 |
| 03rbl.359 | 137 | 137 | 76 | 76 | 144 | 156 | 234 | 234 | 239 | 249 | 298 | 302 | 204 | 204 | 222 | 236 |
| 03rbl.372 | 137 | 137 | 76 | 76 | 144 | 174 | 222 | 240 | 247 | 249 | 302 | 308 | 198 | 204 | 234 | 236 |
| 04rbl.003 | 137 | 137 | 76 | 78 | 140 | 144 | 230 | 240 | 245 | 253 | 296 | 304 | 200 | 202 | 232 | 238 |
| 04rbl.005 | 137 | 137 | 76 | 76 | 144 | 144 | 240 | 240 | 235 | 245 | 292 | 302 | 202 | 204 | 220 | 238 |
| 04rbl.012 | 137 | 137 | 72 | 76 | 144 | 144 | 224 | 240 | 245 | 247 | 296 | 304 | 200 | 210 | 236 | 238 |
| 04rbl.017 | 137 | 137 | 76 | 76 | 144 | 144 | 222 | 230 | 245 | 255 | 296 | 302 | 202 | 202 | 220 | 230 |
| 04rbl.019 | 137 | 137 | 76 | 76 | 144 | 158 | 224 | 230 | 245 | 255 | 296 | 302 | 196 | 200 | 224 | 230 |
| 04rbl.028 | 137 | 137 | 76 | 76 | 144 | 154 | 230 | 240 | 235 | 245 | 292 | 296 | 200 | 206 | 220 | 252 |
| 04rbl.029 | 137 | 137 | 76 | 76 | 144 | 176 | 222 | 230 | 235 | 247 | 292 | 294 | 200 | 202 | 234 | 236 |
| 04rbl.031 | 137 | 137 | 76 | 76 | 144 | 144 | 222 | 230 | 245 | 249 | 296 | 302 | 198 | 202 | 234 | 236 |

|           |     |     |    |    |     |     |     |     |     |     |     |     |     |     |     |     |
|-----------|-----|-----|----|----|-----|-----|-----|-----|-----|-----|-----|-----|-----|-----|-----|-----|
| 04rbl.042 | 137 | 137 | 76 | 76 | 144 | 156 | 230 | 230 | 245 | 249 | 292 | 298 | 198 | 202 | 234 | 236 |
| 04rbl.047 | 137 | 137 | 76 | 78 | 156 | 156 | 214 | 224 | 235 | 239 | 292 | 296 | 194 | 200 | 234 | 244 |
| 04rbl.054 | 135 | 137 | 76 | 76 | 158 | 182 | 214 | 248 | 245 | 249 | 298 | 300 | 198 | 202 | 234 | 248 |
| 04rbl.060 | 137 | 137 | 76 | 76 | 144 | 156 | 232 | 252 | 239 | 241 | 292 | 302 | 160 | 206 | 234 | 236 |
| 04rbl.061 | 137 | 137 | 76 | 76 | 144 | 144 | 222 | 224 | 245 | 249 | 298 | 302 | 196 | 202 | 234 | 252 |
| 04rbl.064 | 137 | 137 | 76 | 76 | 144 | 156 | 226 | 230 | 247 | 251 | 296 | 306 | 180 | 202 | 218 | 238 |
| 04rbl.065 | 135 | 137 | 76 | 76 | 156 | 176 | 220 | 222 | 235 | 249 | 296 | 312 | 180 | 202 | 216 | 238 |
| 04rbl.066 | 137 | 137 | 76 | 76 | 144 | 144 | 214 | 238 | 241 | 249 | 300 | 306 | 196 | 198 | 234 | 236 |
| 04rbl.068 | 137 | 137 | 76 | 76 | 144 | 174 | 224 | 230 | 247 | 251 | 296 | 304 | 204 | 206 | 240 | 240 |
| 04rbl.081 | 137 | 137 | 76 | 76 | 144 | 162 | 220 | 224 | 245 | 247 | 296 | 300 | 204 | 204 | 236 | 242 |
| 04rbl.086 | 135 | 137 | 76 | 76 | 144 | 158 | 224 | 230 | 241 | 251 | 306 | 310 | 180 | 202 | 192 | 226 |
| 04rbl.088 | 137 | 137 | 76 | 76 | 144 | 152 | 240 | 240 | 245 | 245 | 294 | 298 | 196 | 208 | 214 | 214 |
| 04rbl.091 | 137 | 137 | 76 | 76 | 144 | 144 | 228 | 236 | 245 | 249 | 296 | 304 | 198 | 210 | 222 | 236 |
| 04rbl.094 | 137 | 137 | 76 | 76 | 144 | 164 | 230 | 238 | 239 | 245 | 310 | 316 | 196 | 204 | 210 | 238 |
| 04rbl.097 | 137 | 137 | 76 | 76 | 144 | 144 | 224 | 232 | 243 | 249 | 296 | 302 | 198 | 202 | 216 | 236 |
| 04rbl.100 | 137 | 137 | 76 | 76 | 156 | 160 | 224 | 232 | 245 | 247 | 296 | 298 | 160 | 202 | 220 | 242 |
| 04rbl.107 | 137 | 137 | 76 | 76 | 144 | 156 | 226 | 230 | 239 | 245 | 298 | 300 | 180 | 202 | 220 | 236 |
| 04rbl.118 | 137 | 137 | 76 | 78 | 144 | 156 | 230 | 246 | 241 | 251 | 296 | 296 | 196 | 196 | 212 | 238 |
| 04rbl.121 | 137 | 137 | 76 | 76 | 144 | 144 | 224 | 230 | 239 | 249 | 302 | 302 | 202 | 202 | 220 | 224 |
| 04rbl.126 | 135 | 137 | 74 | 76 | 144 | 152 | 224 | 230 | 247 | 247 | 296 | 300 | 198 | 208 | 222 | 238 |
| 04rbl.132 | 137 | 137 | 76 | 76 | 144 | 156 | 222 | 230 | 235 | 239 | 296 | 296 | 198 | 200 | 226 | 236 |
| 04rbl.137 | 137 | 137 | 76 | 76 | 144 | 164 | 226 | 230 | 235 | 251 | 298 | 306 | 202 | 204 | 234 | 238 |
| 04rbl.151 | 137 | 137 | 76 | 76 | 144 | 162 | 222 | 222 | 249 | 251 | 296 | 306 | 200 | 204 | 238 | 240 |
| 04rbl.152 | 137 | 137 | 72 | 76 | 144 | 144 | 240 | 248 | 249 | 249 | 296 | 298 | 200 | 202 | 220 | 236 |
| 04rbl.154 | 137 | 137 | 72 | 76 | 144 | 144 | 236 | 238 | 249 | 251 | 296 | 304 | 198 | 200 | 220 | 236 |
| 04rbl.160 | 137 | 137 | 76 | 76 | 144 | 162 | 238 | 242 | 247 | 257 | 294 | 302 | 196 | 206 | 220 | 240 |
| 04rbl.161 | 137 | 137 | 76 | 76 | 144 | 144 | 214 | 242 | 247 | 253 | 294 | 298 | 202 | 204 | 226 | 250 |
| 04rbl.164 | 137 | 137 | 76 | 76 | 144 | 144 | 226 | 228 | 239 | 245 | 300 | 302 | 180 | 200 | 222 | 244 |
| 04rbl.176 | 137 | 137 | 76 | 76 | 144 | 158 | 224 | 224 | 241 | 251 | 298 | 300 | 200 | 202 | 238 | 238 |
| 04rbl.177 | 137 | 137 | 76 | 76 | 144 | 144 | 232 | 236 | 249 | 255 | 296 | 302 | 202 | 204 | 236 | 238 |
| 04rbl.186 | 137 | 137 | 76 | 76 | 144 | 144 | 226 | 228 | 245 | 245 | 296 | 304 | 204 | 204 | 192 | 222 |
| 04rbl.190 | 137 | 137 | 76 | 76 | 144 | 144 | 224 | 230 | 239 | 247 | 298 | 298 | 200 | 202 | 232 | 234 |
| 04rbl.195 | 137 | 137 | 76 | 76 | 144 | 144 | 222 | 238 | 247 | 249 | 298 | 304 | 196 | 206 | 220 | 234 |
| 04rbl.201 | 135 | 137 | 76 | 76 | 150 | 156 | 228 | 240 | 249 | 251 | 300 | 302 | 206 | 208 | 238 | 246 |
| 04rbl.202 | 137 | 137 | 76 | 76 | 144 | 144 | 232 | 248 | 241 | 251 | 292 | 302 | 202 | 204 | 220 | 238 |
| 04rbl.205 | 137 | 137 | 76 | 76 | 144 | 160 | 224 | 242 | 247 | 249 | 302 | 306 | 200 | 204 | 236 | 242 |
| 04rbl.209 | 135 | 137 | 76 | 76 | 144 | 144 | 224 | 234 | 241 | 251 | 296 | 298 | 202 | 202 | 214 | 236 |

|           |     |     |    |    |     |     |     |     |     |     |     |     |     |     |     |     |
|-----------|-----|-----|----|----|-----|-----|-----|-----|-----|-----|-----|-----|-----|-----|-----|-----|
| 04rbl.210 | 135 | 137 | 76 | 76 | 144 | 152 | 222 | 248 | 239 | 239 | 270 | 300 | 200 | 204 | 222 | 236 |
| 04rbl.216 | 137 | 137 | 76 | 76 | 144 | 158 | 234 | 248 | 239 | 245 | 292 | 296 | 204 | 204 | 238 | 238 |
| 04rbl.220 | 137 | 137 | 76 | 76 | 144 | 158 | 226 | 240 | 249 | 249 | 304 | 308 | 202 | 202 | 230 | 234 |
| 04rbl.221 | 137 | 137 | 76 | 76 | 144 | 158 | 224 | 230 | 237 | 241 | 296 | 302 | 202 | 206 | 218 | 234 |
| 04rbl.224 | 137 | 137 | 76 | 76 | 144 | 144 | 222 | 224 | 239 | 247 | 296 | 302 | 198 | 202 | 218 | 234 |
| 04rbl.226 | 137 | 137 | 76 | 76 | 144 | 144 | 222 | 230 | 245 | 249 | 298 | 300 | 202 | 202 | 218 | 234 |
| 04rbl.228 | 137 | 137 | 76 | 76 | 144 | 156 | 230 | 244 | 239 | 249 | 296 | 310 | 196 | 200 | 192 | 252 |
| 04rbl.233 | 137 | 137 | 76 | 76 | 152 | 158 | 230 | 238 | 243 | 253 | 296 | 308 | 160 | 204 | 218 | 228 |
| 04rbl.237 | 137 | 137 | 76 | 78 | 144 | 158 | 222 | 240 | 243 | 249 | 296 | 306 | 160 | 200 | 236 | 242 |
| 04rbl.246 | 137 | 137 | 76 | 76 | 144 | 144 | 226 | 248 | 239 | 243 | 296 | 298 | 160 | 200 | 218 | 222 |
| 04rbl.249 | 137 | 137 | 76 | 76 | 144 | 154 | 230 | 234 | 247 | 249 | 300 | 302 | 196 | 204 | 220 | 236 |
| 04rbl.255 | 137 | 137 | 76 | 76 | 144 | 158 | 226 | 230 | 237 | 249 | 296 | 298 | 202 | 204 | 220 | 226 |
| 04rbl.266 | 135 | 137 | 76 | 76 | 144 | 164 | 222 | 224 | 241 | 251 | 296 | 302 | 196 | 200 | 238 | 252 |
| 04rbl.267 | 135 | 137 | 76 | 76 | 156 | 164 | 224 | 236 | 235 | 245 | 296 | 302 | 196 | 206 | 216 | 222 |
| 04rbl.272 | 135 | 137 | 76 | 76 | 144 | 156 | 228 | 236 | 235 | 245 | 300 | 310 | 198 | 200 | 236 | 236 |
| 04rbl.277 | 137 | 137 | 76 | 76 | 144 | 164 | 214 | 222 | 241 | 249 | 294 | 302 | 200 | 204 | 220 | 236 |
| 04rbl.279 | 135 | 137 | 76 | 76 | 144 | 162 | 232 | 240 | 245 | 249 | 294 | 300 | 204 | 204 | 222 | 234 |
| 04rbl.294 | 137 | 137 | 76 | 78 | 144 | 158 | 240 | 262 | 245 | 249 | 302 | 302 | 202 | 202 | 192 | 220 |
| 04rbl.297 | 135 | 137 | 76 | 76 | 144 | 144 | 220 | 242 | 247 | 249 | 292 | 302 | 198 | 200 | 218 | 222 |
| 04rbl.298 | 137 | 137 | 76 | 78 | 144 | 144 | 232 | 242 | 249 | 251 | 292 | 302 | 200 | 206 | 220 | 248 |
| 04rbl.300 | 137 | 137 | 76 | 76 | 144 | 190 | 214 | 230 | 235 | 245 | 298 | 302 | 198 | 204 | 222 | 234 |
| 04rbl.303 | 137 | 137 | 76 | 76 | 144 | 144 | 230 | 240 | 239 | 239 | 294 | 296 | 204 | 204 | 220 | 234 |
| 04rbl.306 | 137 | 137 | 76 | 76 | 144 | 144 | 224 | 230 | 247 | 249 | 298 | 302 | 198 | 200 | 218 | 222 |
| 04rbl.307 | 137 | 137 | 76 | 76 | 144 | 144 | 220 | 220 | 235 | 249 | 298 | 298 | 204 | 208 | 220 | 250 |
| 04rbl.312 | 137 | 137 | 76 | 76 | 144 | 144 | 228 | 230 | 247 | 249 | 298 | 302 | 200 | 200 | 216 | 220 |
| 04rbl.313 | 137 | 137 | 76 | 76 | 144 | 158 | 212 | 230 | 239 | 241 | 298 | 300 | 204 | 206 | 226 | 236 |
| 04rbl.316 | 137 | 137 | 76 | 76 | 144 | 154 | 226 | 234 | 239 | 241 | 298 | 300 | 202 | 204 | 192 | 228 |
| 04rbl.317 | 137 | 137 | 76 | 76 | 158 | 182 | 238 | 248 | 245 | 249 | 298 | 300 | 202 | 202 | 236 | 250 |
| 04rbl.330 | 137 | 137 | 76 | 76 | 144 | 158 | 222 | 246 | 235 | 245 | 298 | 300 | 204 | 208 | 234 | 234 |
| 04rbl.339 | 137 | 137 | 76 | 76 | 144 | 144 | 230 | 238 | 249 | 251 | 292 | 294 | 160 | 202 | 214 | 236 |
| 04rbl.345 | 137 | 137 | 76 | 76 | 144 | 160 | 230 | 238 | 249 | 249 | 298 | 302 | 196 | 202 | 228 | 230 |
| 04rbl.346 | 137 | 137 | 76 | 76 | 144 | 144 | 220 | 238 | 239 | 249 | 302 | 302 | 200 | 200 | 234 | 238 |
| 04rbl.348 | 137 | 137 | 76 | 76 | 144 | 158 | 224 | 230 | 245 | 249 | 294 | 302 | 202 | 204 | 238 | 240 |
| 04rbl.355 | 137 | 137 | 76 | 78 | 144 | 144 | 222 | 230 | 251 | 251 | 294 | 302 | 202 | 206 | 212 | 250 |
| 04rbl.358 | 135 | 135 | 76 | 76 | 144 | 162 | 222 | 234 | 245 | 249 | 294 | 302 | 200 | 206 | 212 | 236 |
| 04rbl.368 | 137 | 137 | 76 | 76 | 144 | 144 | 230 | 230 | 245 | 249 | 300 | 302 | 196 | 202 | 236 | 254 |
| 04rbl.371 | 137 | 137 | 76 | 76 | 144 | 144 | 228 | 230 | 245 | 249 | 298 | 302 | 160 | 196 | 220 | 244 |

|           |     |     |    |    |     |     |     |     |     |     |     |     |     |     |     |     |
|-----------|-----|-----|----|----|-----|-----|-----|-----|-----|-----|-----|-----|-----|-----|-----|-----|
| 04rbl.383 | 137 | 137 | 76 | 76 | 162 | 174 | 224 | 228 | 239 | 245 | 298 | 302 | 200 | 202 | 240 | 248 |
| 04rbl.384 | 137 | 137 | 76 | 76 | 144 | 144 | 226 | 246 | 239 | 245 | 274 | 306 | 202 | 202 | 236 | 246 |
| 04rbl.388 | 137 | 137 | 76 | 76 | 144 | 144 | 224 | 246 | 235 | 249 | 302 | 304 | 200 | 200 | 192 | 238 |
| 04rbl.390 | 137 | 137 | 76 | 76 | 156 | 176 | 218 | 234 | 245 | 247 | 298 | 306 | 200 | 202 | 246 | 254 |
| 04rbl.400 | 137 | 137 | 72 | 76 | 144 | 144 | 230 | 246 | 239 | 247 | 292 | 294 | 160 | 200 | 220 | 230 |
| 04rbl.404 | 135 | 137 | 76 | 76 | 144 | 144 | 220 | 234 | 241 | 243 | 298 | 300 | 178 | 202 | 230 | 236 |
| 04rbl.409 | 137 | 137 | 76 | 76 | 144 | 156 | 222 | 240 | 245 | 247 | 294 | 296 | 200 | 202 | 220 | 222 |
| 04rbl.425 | 137 | 137 | 76 | 76 | 144 | 144 | 230 | 264 | 245 | 245 | 292 | 296 | 202 | 202 | 220 | 236 |
| 04rbl.433 | 137 | 137 | 76 | 76 | 144 | 144 | 240 | 242 | 245 | 247 | 298 | 302 | 160 | 204 | 230 | 238 |
| 04rbl.441 | 137 | 137 | 76 | 76 | 144 | 154 | 224 | 228 | 239 | 255 | 296 | 296 | 200 | 202 | 230 | 232 |
| 04rbl.443 | 137 | 137 | 76 | 76 | 144 | 144 | 228 | 228 | 247 | 249 | 304 | 308 | 198 | 200 | 222 | 238 |
| 04rbl.446 | 137 | 137 | 76 | 76 | 144 | 156 | 220 | 238 | 249 | 251 | 296 | 298 | 196 | 196 | 218 | 230 |
| 04rbl.463 | 137 | 137 | 76 | 76 | 144 | 144 | 226 | 228 | 245 | 249 | 298 | 304 | 200 | 202 | 218 | 248 |
| 04rbl.464 | 135 | 137 | 76 | 76 | 144 | 144 | 222 | 238 | 249 | 249 | 0   | 0   | 200 | 204 | 220 | 254 |
| 04rbl.471 | 137 | 137 | 74 | 76 | 144 | 144 | 224 | 246 | 247 | 251 | 294 | 296 | 200 | 204 | 234 | 248 |
| 04rbl.472 | 137 | 137 | 76 | 76 | 144 | 144 | 234 | 246 | 247 | 251 | 294 | 302 | 160 | 204 | 220 | 222 |
| 04rbl.473 | 135 | 137 | 76 | 76 | 156 | 156 | 228 | 246 | 245 | 249 | 296 | 304 | 198 | 204 | 220 | 242 |
| 04rbl.474 | 137 | 137 | 76 | 76 | 144 | 144 | 224 | 234 | 237 | 251 | 296 | 300 | 202 | 204 | 232 | 238 |
| 04rbl.477 | 137 | 137 | 76 | 76 | 144 | 154 | 222 | 246 | 247 | 249 | 296 | 300 | 196 | 200 | 192 | 234 |
| 04rbl.480 | 137 | 137 | 76 | 76 | 144 | 162 | 230 | 238 | 249 | 249 | 306 | 314 | 202 | 204 | 234 | 244 |
| 04rbl.483 | 137 | 137 | 76 | 76 | 144 | 154 | 246 | 248 | 237 | 241 | 300 | 302 | 204 | 204 | 212 | 220 |
| 04rbl.484 | 137 | 137 | 76 | 76 | 144 | 152 | 224 | 230 | 245 | 251 | 302 | 302 | 196 | 204 | 220 | 244 |
| 04rbl.485 | 137 | 137 | 76 | 76 | 156 | 158 | 224 | 238 | 239 | 247 | 294 | 306 | 202 | 202 | 220 | 228 |
| 04rbl.491 | 137 | 137 | 76 | 76 | 144 | 156 | 222 | 242 | 245 | 245 | 300 | 302 | 202 | 206 | 192 | 230 |
| 04rbl.492 | 137 | 137 | 76 | 76 | 144 | 156 | 230 | 230 | 239 | 247 | 298 | 302 | 202 | 208 | 192 | 220 |
| 04rbl.493 | 137 | 137 | 76 | 76 | 144 | 144 | 224 | 242 | 235 | 239 | 298 | 298 | 202 | 208 | 232 | 236 |
| 04rbl.494 | 137 | 137 | 76 | 76 | 154 | 186 | 230 | 246 | 237 | 251 | 298 | 300 | 202 | 208 | 212 | 232 |
| 04rbl.495 | 137 | 137 | 76 | 76 | 144 | 156 | 226 | 230 | 245 | 247 | 296 | 300 | 200 | 206 | 220 | 248 |
| 04rbl.499 | 137 | 137 | 76 | 78 | 158 | 158 | 230 | 242 | 245 | 245 | 304 | 304 | 160 | 206 | 212 | 220 |
| 04rbl.502 | 135 | 137 | 76 | 76 | 144 | 156 | 238 | 248 | 247 | 247 | 296 | 304 | 202 | 204 | 234 | 236 |
| 04rbl.506 | 137 | 137 | 76 | 76 | 144 | 144 | 224 | 224 | 247 | 249 | 300 | 302 | 200 | 204 | 236 | 238 |
| 04rbl.519 | 137 | 137 | 76 | 76 | 144 | 156 | 230 | 234 | 245 | 247 | 300 | 302 | 198 | 204 | 224 | 252 |
| 04rbl.539 | 137 | 137 | 76 | 76 | 144 | 156 | 242 | 242 | 239 | 245 | 292 | 318 | 200 | 204 | 218 | 234 |
| 04rbl.545 | 135 | 137 | 76 | 76 | 144 | 144 | 224 | 230 | 239 | 239 | 296 | 330 | 204 | 210 | 228 | 234 |
| 04rbl.546 | 137 | 137 | 76 | 76 | 144 | 144 | 238 | 242 | 239 | 245 | 296 | 298 | 204 | 206 | 220 | 234 |
| 04rbl.550 | 137 | 137 | 76 | 76 | 144 | 144 | 212 | 230 | 239 | 249 | 296 | 304 | 196 | 202 | 234 | 236 |
| 04rbl.551 | 137 | 137 | 76 | 76 | 144 | 158 | 224 | 244 | 235 | 239 | 300 | 330 | 204 | 204 | 222 | 234 |

|           |     |     |    |    |     |     |     |     |     |     |     |     |     |     |     |     |
|-----------|-----|-----|----|----|-----|-----|-----|-----|-----|-----|-----|-----|-----|-----|-----|-----|
| 04rbl.556 | 137 | 137 | 76 | 76 | 144 | 144 | 240 | 242 | 239 | 241 | 292 | 330 | 202 | 210 | 228 | 236 |
| 05rbl.005 | 137 | 137 | 76 | 76 | 144 | 144 | 230 | 238 | 241 | 245 | 300 | 312 | 200 | 200 | 222 | 240 |
| 05rbl.009 | 135 | 137 | 76 | 76 | 156 | 170 | 222 | 224 | 237 | 239 | 298 | 300 | 200 | 210 | 234 | 234 |
| 05rbl.014 | 137 | 137 | 76 | 76 | 144 | 156 | 230 | 230 | 239 | 241 | 296 | 298 | 200 | 200 | 236 | 252 |
| 05rbl.022 | 137 | 137 | 76 | 78 | 144 | 156 | 222 | 230 | 239 | 245 | 300 | 308 | 200 | 206 | 236 | 238 |
| 05rbl.030 | 137 | 137 | 76 | 76 | 144 | 184 | 224 | 230 | 239 | 249 | 298 | 302 | 202 | 204 | 214 | 226 |
| 05rbl.033 | 137 | 137 | 76 | 76 | 144 | 144 | 212 | 224 | 245 | 245 | 296 | 302 | 200 | 202 | 212 | 238 |
| 05rbl.043 | 137 | 137 | 76 | 78 | 144 | 158 | 224 | 234 | 241 | 251 | 298 | 304 | 202 | 202 | 192 | 194 |
| 05rbl.044 | 137 | 137 | 76 | 76 | 144 | 144 | 228 | 248 | 247 | 257 | 296 | 304 | 200 | 206 | 226 | 240 |
| 05rbl.045 | 137 | 137 | 76 | 78 | 144 | 158 | 222 | 222 | 247 | 257 | 288 | 310 | 202 | 208 | 236 | 238 |
| 05rbl.053 | 135 | 137 | 76 | 76 | 144 | 164 | 212 | 224 | 245 | 245 | 296 | 302 | 200 | 202 | 212 | 230 |
| 05rbl.056 | 135 | 135 | 76 | 76 | 144 | 144 | 226 | 248 | 237 | 245 | 310 | 312 | 204 | 204 | 212 | 236 |
| 05rbl.058 | 135 | 137 | 76 | 76 | 144 | 144 | 220 | 230 | 237 | 247 | 298 | 302 | 202 | 204 | 218 | 242 |
| 05rbl.059 | 137 | 137 | 74 | 76 | 156 | 174 | 234 | 238 | 239 | 239 | 296 | 296 | 200 | 208 | 218 | 242 |
| 05rbl.061 | 137 | 137 | 76 | 78 | 144 | 158 | 224 | 224 | 247 | 249 | 298 | 302 | 196 | 200 | 234 | 238 |
| 05rbl.063 | 137 | 137 | 76 | 76 | 158 | 164 | 236 | 240 | 247 | 249 | 298 | 300 | 196 | 200 | 214 | 236 |
| 05rbl.065 | 137 | 137 | 76 | 76 | 144 | 170 | 212 | 234 | 247 | 249 | 298 | 312 | 202 | 204 | 234 | 236 |
| 05rbl.073 | 135 | 137 | 76 | 76 | 144 | 158 | 222 | 230 | 245 | 251 | 300 | 302 | 202 | 204 | 240 | 252 |
| 05rbl.078 | 137 | 137 | 76 | 76 | 144 | 180 | 230 | 238 | 245 | 249 | 302 | 302 | 160 | 200 | 240 | 242 |
| 05rbl.080 | 137 | 137 | 76 | 76 | 144 | 156 | 222 | 230 | 241 | 245 | 292 | 294 | 160 | 196 | 220 | 220 |
| 05rbl.081 | 137 | 137 | 76 | 78 | 152 | 156 | 224 | 226 | 245 | 249 | 296 | 302 | 202 | 202 | 216 | 224 |
| 05rbl.082 | 135 | 137 | 76 | 76 | 144 | 164 | 224 | 238 | 247 | 251 | 302 | 302 | 198 | 202 | 220 | 232 |
| 05rbl.083 | 137 | 137 | 76 | 76 | 144 | 156 | 214 | 224 | 237 | 247 | 294 | 302 | 196 | 202 | 218 | 220 |
| 05rbl.086 | 137 | 137 | 76 | 76 | 144 | 156 | 224 | 246 | 247 | 249 | 298 | 304 | 200 | 202 | 220 | 236 |
| 05rbl.090 | 137 | 137 | 76 | 76 | 144 | 156 | 228 | 242 | 239 | 245 | 302 | 302 | 202 | 202 | 234 | 236 |
| 05rbl.096 | 137 | 137 | 76 | 76 | 144 | 156 | 224 | 232 | 247 | 247 | 296 | 296 | 200 | 202 | 232 | 254 |
| 05rbl.099 | 135 | 135 | 76 | 76 | 144 | 156 | 222 | 226 | 237 | 249 | 294 | 296 | 198 | 206 | 192 | 246 |
| 05rbl.102 | 135 | 137 | 76 | 78 | 144 | 144 | 220 | 234 | 239 | 241 | 298 | 300 | 200 | 202 | 230 | 234 |
| 05rbl.108 | 137 | 137 | 76 | 76 | 144 | 156 | 236 | 238 | 239 | 249 | 296 | 304 | 196 | 196 | 230 | 232 |
| 05rbl.109 | 137 | 137 | 74 | 76 | 144 | 144 | 214 | 228 | 245 | 247 | 296 | 298 | 200 | 202 | 214 | 216 |
| 05rbl.117 | 137 | 137 | 76 | 76 | 156 | 156 | 230 | 234 | 239 | 239 | 298 | 298 | 196 | 200 | 192 | 234 |
| 05rbl.120 | 135 | 137 | 76 | 76 | 144 | 152 | 232 | 246 | 241 | 255 | 298 | 302 | 196 | 202 | 240 | 260 |
| 05rbl.121 | 137 | 137 | 76 | 76 | 144 | 144 | 248 | 248 | 249 | 249 | 296 | 302 | 198 | 206 | 212 | 236 |
| 05rbl.122 | 137 | 137 | 76 | 76 | 144 | 156 | 224 | 226 | 245 | 255 | 298 | 302 | 180 | 200 | 220 | 234 |
| 05rbl.123 | 137 | 137 | 76 | 76 | 144 | 176 | 222 | 242 | 245 | 249 | 296 | 296 | 196 | 206 | 212 | 246 |
| 05rbl.128 | 135 | 137 | 76 | 76 | 144 | 174 | 230 | 240 | 239 | 245 | 302 | 304 | 160 | 202 | 212 | 248 |
| 05rbl.134 | 137 | 137 | 76 | 76 | 144 | 158 | 222 | 232 | 239 | 245 | 296 | 306 | 200 | 206 | 234 | 234 |

|           |     |     |    |    |     |     |     |     |     |     |     |     |     |     |     |     |
|-----------|-----|-----|----|----|-----|-----|-----|-----|-----|-----|-----|-----|-----|-----|-----|-----|
| 05rbl.140 | 137 | 137 | 76 | 76 | 144 | 158 | 234 | 238 | 235 | 247 | 300 | 306 | 202 | 208 | 214 | 234 |
| 05rbl.144 | 137 | 137 | 76 | 76 | 144 | 144 | 224 | 238 | 239 | 245 | 294 | 298 | 198 | 202 | 220 | 222 |
| 05rbl.146 | 137 | 137 | 76 | 76 | 144 | 154 | 222 | 222 | 245 | 247 | 294 | 298 | 196 | 200 | 220 | 250 |
| 05rbl.147 | 137 | 137 | 76 | 76 | 144 | 144 | 248 | 250 | 247 | 247 | 296 | 308 | 160 | 200 | 226 | 234 |
| 05rbl.148 | 137 | 137 | 76 | 76 | 144 | 156 | 232 | 246 | 239 | 245 | 298 | 298 | 180 | 206 | 220 | 232 |
| 05rbl.149 | 137 | 137 | 76 | 76 | 144 | 144 | 238 | 250 | 247 | 247 | 292 | 298 | 200 | 210 | 230 | 246 |
| 05rbl.152 | 137 | 137 | 76 | 76 | 156 | 164 | 214 | 246 | 239 | 245 | 298 | 302 | 202 | 202 | 220 | 234 |
| 05rbl.154 | 137 | 137 | 76 | 76 | 158 | 172 | 222 | 246 | 241 | 249 | 296 | 304 | 198 | 200 | 238 | 248 |
| 05rbl.155 | 137 | 137 | 76 | 76 | 144 | 144 | 240 | 246 | 237 | 245 | 298 | 302 | 206 | 206 | 232 | 234 |
| 05rbl.156 | 137 | 137 | 76 | 78 | 144 | 144 | 226 | 242 | 239 | 239 | 302 | 308 | 180 | 200 | 222 | 264 |
| 05rbl.163 | 137 | 137 | 76 | 76 | 144 | 156 | 222 | 236 | 247 | 249 | 296 | 298 | 198 | 200 | 220 | 236 |
| 05rbl.164 | 137 | 137 | 76 | 76 | 144 | 156 | 212 | 222 | 245 | 245 | 296 | 300 | 202 | 204 | 236 | 240 |
| 05rbl.175 | 137 | 137 | 76 | 76 | 144 | 144 | 230 | 238 | 241 | 253 | 296 | 334 | 200 | 200 | 220 | 226 |
| 05rbl.180 | 135 | 137 | 76 | 76 | 144 | 144 | 220 | 230 | 239 | 245 | 302 | 304 | 200 | 206 | 236 | 238 |
| 05rbl.181 | 137 | 137 | 76 | 76 | 144 | 144 | 230 | 236 | 245 | 245 | 298 | 298 | 196 | 206 | 236 | 246 |
| 05rbl.183 | 137 | 137 | 76 | 76 | 144 | 144 | 222 | 222 | 253 | 253 | 296 | 296 | 196 | 200 | 222 | 240 |
| 05rbl.187 | 137 | 137 | 76 | 76 | 144 | 144 | 224 | 236 | 249 | 251 | 294 | 300 | 198 | 202 | 212 | 232 |
| 05rbl.190 | 137 | 137 | 76 | 76 | 144 | 176 | 220 | 224 | 251 | 253 | 292 | 296 | 196 | 202 | 222 | 238 |
| 05rbl.192 | 137 | 137 | 76 | 76 | 144 | 158 | 222 | 230 | 249 | 249 | 286 | 296 | 200 | 206 | 216 | 252 |
| 05rbl.198 | 137 | 137 | 76 | 76 | 144 | 180 | 232 | 238 | 239 | 245 | 298 | 304 | 202 | 212 | 218 | 238 |
| 05rbl.200 | 135 | 137 | 76 | 76 | 144 | 168 | 222 | 224 | 239 | 249 | 300 | 300 | 196 | 200 | 232 | 254 |
| 05rbl.201 | 137 | 137 | 76 | 78 | 144 | 180 | 224 | 238 | 239 | 251 | 294 | 300 | 198 | 200 | 212 | 232 |
| 05rbl.202 | 137 | 137 | 76 | 76 | 144 | 156 | 232 | 248 | 245 | 253 | 296 | 300 | 198 | 202 | 234 | 240 |
| 05rbl.206 | 135 | 137 | 76 | 76 | 144 | 144 | 222 | 248 | 247 | 253 | 296 | 300 | 196 | 196 | 240 | 254 |
| 05rbl.210 | 137 | 137 | 76 | 76 | 144 | 156 | 224 | 236 | 235 | 247 | 300 | 304 | 202 | 208 | 192 | 236 |
| 05rbl.211 | 137 | 137 | 76 | 76 | 144 | 156 | 228 | 248 | 237 | 249 | 294 | 302 | 196 | 200 | 222 | 246 |
| 05rbl.212 | 137 | 137 | 76 | 76 | 144 | 164 | 226 | 228 | 237 | 249 | 296 | 296 | 202 | 202 | 228 | 252 |
| 05rbl.215 | 137 | 137 | 76 | 76 | 144 | 144 | 238 | 240 | 247 | 249 | 304 | 304 | 160 | 204 | 230 | 236 |
| 05rbl.216 | 137 | 137 | 76 | 76 | 144 | 144 | 212 | 220 | 239 | 241 | 302 | 308 | 160 | 200 | 220 | 248 |
| 05rbl.220 | 137 | 137 | 76 | 76 | 144 | 144 | 224 | 252 | 245 | 255 | 292 | 300 | 160 | 202 | 194 | 212 |
| 05rbl.222 | 137 | 137 | 76 | 76 | 144 | 144 | 228 | 228 | 247 | 249 | 296 | 298 | 196 | 202 | 234 | 264 |
| 05rbl.223 | 137 | 137 | 76 | 76 | 144 | 144 | 222 | 232 | 241 | 253 | 296 | 300 | 200 | 202 | 220 | 254 |
| 05rbl.226 | 137 | 137 | 74 | 76 | 144 | 158 | 226 | 232 | 241 | 251 | 294 | 296 | 196 | 200 | 192 | 236 |
| 05rbl.233 | 137 | 137 | 76 | 76 | 144 | 144 | 224 | 230 | 241 | 245 | 300 | 300 | 198 | 200 | 212 | 250 |
| 05rbl.241 | 137 | 137 | 76 | 76 | 144 | 144 | 222 | 238 | 235 | 247 | 292 | 304 | 200 | 202 | 224 | 238 |
| 05rbl.242 | 137 | 137 | 76 | 78 | 156 | 176 | 230 | 230 | 247 | 249 | 300 | 302 | 200 | 200 | 222 | 236 |
| 05rbl.268 | 137 | 137 | 76 | 76 | 144 | 144 | 230 | 230 | 249 | 249 | 294 | 298 | 198 | 198 | 222 | 238 |

|           |     |     |    |    |     |     |     |     |     |     |     |     |     |     |     |     |
|-----------|-----|-----|----|----|-----|-----|-----|-----|-----|-----|-----|-----|-----|-----|-----|-----|
| 05rbl.270 | 137 | 137 | 76 | 76 | 144 | 144 | 222 | 246 | 245 | 245 | 296 | 304 | 202 | 202 | 238 | 240 |
| 05rbl.272 | 137 | 137 | 76 | 76 | 144 | 152 | 224 | 240 | 245 | 245 | 294 | 296 | 200 | 202 | 220 | 242 |
| 05rbl.273 | 137 | 137 | 76 | 76 | 144 | 144 | 224 | 230 | 245 | 245 | 292 | 302 | 196 | 202 | 220 | 234 |
| 05rbl.275 | 135 | 137 | 76 | 76 | 144 | 176 | 212 | 222 | 245 | 245 | 294 | 296 | 200 | 210 | 220 | 234 |
| 05rbl.284 | 137 | 137 | 76 | 78 | 144 | 144 | 214 | 230 | 245 | 249 | 292 | 296 | 198 | 200 | 222 | 252 |
| 05rbl.297 | 137 | 137 | 76 | 76 | 144 | 144 | 222 | 234 | 235 | 245 | 304 | 320 | 196 | 196 | 240 | 244 |
| 05rbl.298 | 137 | 137 | 76 | 76 | 144 | 144 | 230 | 230 | 239 | 247 | 294 | 296 | 196 | 200 | 242 | 256 |
| 05rbl.301 | 137 | 137 | 76 | 78 | 140 | 144 | 222 | 224 | 239 | 241 | 294 | 302 | 198 | 198 | 230 | 232 |
| 05rbl.302 | 135 | 137 | 76 | 76 | 144 | 164 | 230 | 230 | 239 | 245 | 286 | 294 | 202 | 204 | 220 | 244 |
| 05rbl.305 | 137 | 137 | 76 | 76 | 144 | 144 | 232 | 238 | 235 | 245 | 294 | 302 | 198 | 200 | 190 | 192 |
| 05rbl.306 | 137 | 137 | 74 | 76 | 144 | 144 | 226 | 240 | 239 | 249 | 298 | 300 | 196 | 204 | 226 | 240 |
| 05rbl.313 | 137 | 137 | 76 | 76 | 144 | 156 | 218 | 224 | 247 | 249 | 296 | 302 | 202 | 202 | 236 | 240 |
| 05rbl.314 | 137 | 137 | 76 | 76 | 144 | 176 | 228 | 228 | 245 | 251 | 298 | 304 | 160 | 202 | 226 | 238 |
| 05rbl.316 | 137 | 137 | 76 | 78 | 156 | 156 | 222 | 236 | 245 | 249 | 294 | 296 | 202 | 206 | 220 | 232 |
| 05rbl.320 | 137 | 137 | 76 | 76 | 144 | 144 | 224 | 226 | 251 | 251 | 302 | 304 | 196 | 206 | 236 | 236 |
| 05rbl.322 | 137 | 137 | 76 | 76 | 144 | 156 | 222 | 238 | 245 | 247 | 298 | 300 | 202 | 204 | 240 | 244 |
| 05rbl.324 | 137 | 137 | 76 | 76 | 144 | 144 | 222 | 224 | 235 | 253 | 296 | 298 | 196 | 202 | 230 | 242 |
| 05rbl.329 | 137 | 137 | 76 | 78 | 144 | 144 | 230 | 230 | 235 | 251 | 294 | 300 | 200 | 200 | 220 | 234 |
| 05rbl.331 | 137 | 137 | 76 | 76 | 144 | 158 | 224 | 230 | 245 | 253 | 300 | 302 | 208 | 210 | 234 | 236 |
| 05rbl.334 | 137 | 137 | 76 | 76 | 144 | 144 | 230 | 230 | 249 | 249 | 300 | 308 | 198 | 200 | 234 | 256 |
| 05rbl.343 | 137 | 137 | 76 | 76 | 144 | 156 | 224 | 232 | 241 | 243 | 298 | 302 | 204 | 204 | 232 | 246 |
| 05rbl.345 | 137 | 137 | 72 | 76 | 144 | 158 | 224 | 240 | 247 | 247 | 302 | 304 | 198 | 200 | 220 | 256 |
| 05rbl.349 | 137 | 137 | 76 | 76 | 156 | 156 | 230 | 240 | 253 | 253 | 300 | 302 | 160 | 204 | 236 | 236 |
| 05rbl.350 | 137 | 137 | 76 | 76 | 144 | 152 | 228 | 248 | 241 | 247 | 298 | 298 | 196 | 200 | 236 | 240 |
| 05rbl.351 | 137 | 137 | 76 | 76 | 144 | 152 | 214 | 230 | 239 | 247 | 296 | 304 | 202 | 204 | 192 | 240 |
| 05rbl.357 | 137 | 137 | 76 | 76 | 144 | 156 | 238 | 238 | 239 | 241 | 298 | 318 | 196 | 196 | 212 | 238 |
| 05rbl.362 | 137 | 137 | 76 | 76 | 144 | 162 | 222 | 232 | 235 | 249 | 302 | 302 | 200 | 204 | 220 | 234 |
| 05rbl.366 | 137 | 137 | 76 | 76 | 144 | 158 | 224 | 238 | 247 | 247 | 296 | 306 | 198 | 200 | 222 | 246 |
| 05rbl.367 | 137 | 137 | 76 | 76 | 144 | 150 | 220 | 250 | 241 | 253 | 294 | 296 | 202 | 210 | 220 | 240 |
| 05rbl.369 | 137 | 137 | 76 | 78 | 144 | 158 | 230 | 234 | 249 | 249 | 292 | 298 | 196 | 202 | 220 | 240 |
| 05rbl.370 | 137 | 137 | 72 | 76 | 144 | 158 | 232 | 242 | 243 | 249 | 300 | 302 | 200 | 202 | 236 | 252 |
| 05rbl.373 | 137 | 137 | 76 | 76 | 144 | 144 | 222 | 242 | 247 | 249 | 298 | 302 | 200 | 202 | 220 | 222 |
| 05rbl.377 | 137 | 137 | 76 | 76 | 144 | 144 | 224 | 230 | 247 | 255 | 294 | 302 | 202 | 208 | 212 | 234 |
| 05rbl.387 | 137 | 137 | 76 | 78 | 144 | 154 | 232 | 238 | 237 | 249 | 302 | 302 | 202 | 204 | 234 | 240 |
| 05rbl.390 | 137 | 137 | 76 | 76 | 144 | 160 | 220 | 224 | 239 | 249 | 292 | 304 | 200 | 202 | 220 | 250 |
| 05rbl.395 | 137 | 137 | 74 | 76 | 144 | 158 | 226 | 234 | 247 | 249 | 300 | 308 | 180 | 202 | 220 | 244 |
| 05rbl.398 | 137 | 137 | 76 | 76 | 156 | 168 | 220 | 234 | 241 | 249 | 296 | 300 | 160 | 200 | 212 | 222 |

|           |     |     |    |    |     |     |     |     |     |     |     |     |     |     |     |     |
|-----------|-----|-----|----|----|-----|-----|-----|-----|-----|-----|-----|-----|-----|-----|-----|-----|
| 05rbl.407 | 137 | 137 | 76 | 76 | 144 | 152 | 230 | 230 | 249 | 251 | 296 | 302 | 200 | 200 | 228 | 236 |
| 05rbl.408 | 135 | 137 | 76 | 76 | 172 | 174 | 234 | 242 | 245 | 249 | 296 | 296 | 196 | 200 | 238 | 238 |
| 05rbl.409 | 137 | 137 | 76 | 76 | 144 | 144 | 224 | 230 | 239 | 251 | 296 | 302 | 180 | 198 | 218 | 238 |
| 05rbl.414 | 137 | 137 | 76 | 76 | 158 | 160 | 224 | 230 | 239 | 245 | 298 | 300 | 198 | 202 | 236 | 236 |
| 05rbl.415 | 137 | 137 | 76 | 76 | 144 | 144 | 224 | 230 | 241 | 247 | 302 | 302 | 200 | 202 | 220 | 236 |
| 05rbl.416 | 135 | 137 | 76 | 78 | 144 | 156 | 230 | 230 | 245 | 247 | 296 | 302 | 200 | 206 | 192 | 238 |
| 05rbl.419 | 137 | 137 | 76 | 76 | 144 | 156 | 224 | 230 | 239 | 239 | 294 | 296 | 196 | 196 | 220 | 236 |
| 05rbl.421 | 137 | 137 | 76 | 76 | 144 | 158 | 220 | 224 | 241 | 249 | 300 | 302 | 200 | 204 | 192 | 252 |
| 05rbl.427 | 137 | 137 | 76 | 76 | 144 | 152 | 230 | 236 | 251 | 251 | 296 | 300 | 196 | 200 | 212 | 238 |
| 05rbl.429 | 137 | 137 | 76 | 76 | 144 | 166 | 222 | 242 | 239 | 245 | 300 | 328 | 196 | 200 | 234 | 234 |
| 06rbl.037 | 137 | 137 | 76 | 76 | 144 | 144 | 238 | 240 | 245 | 245 | 302 | 302 | 202 | 202 | 236 | 238 |
| 06rbl.043 | 137 | 137 | 76 | 76 | 144 | 144 | 214 | 230 | 239 | 241 | 302 | 316 | 198 | 200 | 238 | 240 |
| 06rbl.056 | 137 | 137 | 76 | 76 | 144 | 158 | 236 | 236 | 241 | 251 | 296 | 298 | 200 | 210 | 234 | 234 |
| 06rbl.057 | 137 | 137 | 76 | 76 | 144 | 176 | 212 | 230 | 247 | 251 | 292 | 302 | 160 | 204 | 234 | 252 |
| 06rbl.059 | 137 | 137 | 76 | 76 | 144 | 164 | 230 | 248 | 237 | 249 | 300 | 300 | 196 | 200 | 222 | 224 |
| 06rbl.061 | 137 | 137 | 76 | 76 | 144 | 190 | 222 | 236 | 239 | 251 | 296 | 316 | 200 | 202 | 242 | 256 |
| 06rbl.064 | 137 | 137 | 76 | 76 | 144 | 160 | 220 | 224 | 239 | 241 | 302 | 302 | 160 | 200 | 228 | 240 |
| 06rbl.075 | 137 | 137 | 76 | 76 | 144 | 162 | 238 | 240 | 247 | 251 | 294 | 298 | 208 | 208 | 222 | 232 |
| 06rbl.083 | 135 | 137 | 76 | 76 | 158 | 158 | 230 | 232 | 245 | 245 | 294 | 298 | 202 | 208 | 192 | 234 |
| 06rbl.087 | 137 | 137 | 76 | 76 | 158 | 166 | 222 | 230 | 247 | 249 | 296 | 296 | 206 | 206 | 220 | 240 |
| 06rbl.089 | 137 | 137 | 72 | 76 | 144 | 162 | 224 | 230 | 241 | 249 | 296 | 302 | 206 | 208 | 232 | 240 |
| 06rbl.090 | 137 | 137 | 76 | 76 | 144 | 144 | 222 | 242 | 249 | 249 | 300 | 318 | 196 | 202 | 192 | 220 |
| 06rbl.094 | 137 | 137 | 76 | 76 | 144 | 176 | 222 | 230 | 249 | 249 | 296 | 320 | 198 | 200 | 238 | 242 |
| 06rbl.095 | 137 | 137 | 76 | 78 | 144 | 144 | 222 | 230 | 247 | 247 | 292 | 304 | 198 | 204 | 230 | 236 |
| 06rbl.098 | 137 | 137 | 76 | 76 | 144 | 174 | 222 | 230 | 241 | 241 | 292 | 298 | 200 | 202 | 212 | 236 |
| 06rbl.103 | 137 | 137 | 76 | 76 | 144 | 156 | 228 | 236 | 247 | 251 | 298 | 302 | 200 | 202 | 238 | 250 |
| 06rbl.107 | 137 | 137 | 74 | 76 | 144 | 156 | 222 | 222 | 247 | 251 | 300 | 306 | 200 | 202 | 238 | 260 |
| 06rbl.109 | 137 | 137 | 76 | 76 | 144 | 180 | 228 | 228 | 241 | 243 | 302 | 302 | 200 | 200 | 192 | 238 |
| 06rbl.110 | 135 | 137 | 76 | 76 | 156 | 190 | 222 | 232 | 239 | 245 | 296 | 302 | 196 | 200 | 224 | 236 |
| 06rbl.119 | 137 | 137 | 76 | 76 | 152 | 180 | 230 | 230 | 241 | 249 | 300 | 300 | 204 | 204 | 226 | 226 |
| 06rbl.122 | 137 | 137 | 76 | 76 | 152 | 164 | 224 | 232 | 247 | 247 | 294 | 302 | 196 | 202 | 224 | 252 |
| 06rbl.127 | 137 | 137 | 76 | 78 | 156 | 156 | 228 | 264 | 235 | 245 | 296 | 304 | 200 | 202 | 212 | 222 |
| 06rbl.130 | 137 | 137 | 76 | 76 | 144 | 152 | 220 | 224 | 235 | 245 | 294 | 302 | 198 | 200 | 220 | 252 |
| 06rbl.133 | 137 | 137 | 76 | 78 | 144 | 152 | 230 | 246 | 239 | 251 | 292 | 300 | 198 | 202 | 222 | 238 |
| 06rbl.141 | 137 | 137 | 76 | 76 | 144 | 154 | 228 | 238 | 245 | 249 | 294 | 298 | 196 | 204 | 232 | 250 |
| 06rbl.144 | 137 | 137 | 76 | 76 | 144 | 158 | 230 | 246 | 241 | 249 | 294 | 306 | 160 | 196 | 232 | 238 |
| 06rbl.147 | 137 | 137 | 76 | 76 | 144 | 158 | 226 | 242 | 241 | 247 | 296 | 298 | 196 | 204 | 220 | 238 |



|           |     |     |    |    |     |     |     |     |     |     |     |     |     |     |     |     |
|-----------|-----|-----|----|----|-----|-----|-----|-----|-----|-----|-----|-----|-----|-----|-----|-----|
| 06rbl.158 | 137 | 137 | 76 | 76 | 144 | 158 | 222 | 248 | 235 | 239 | 294 | 298 | 200 | 202 | 220 | 220 |
| 06rbl.159 | 137 | 137 | 76 | 76 | 144 | 164 | 224 | 236 | 247 | 251 | 298 | 306 | 198 | 202 | 220 | 224 |
| 06rbl.161 | 135 | 137 | 76 | 76 | 144 | 156 | 224 | 246 | 247 | 251 | 296 | 300 | 200 | 206 | 216 | 222 |
| 06rbl.162 | 135 | 137 | 76 | 76 | 156 | 156 | 220 | 224 | 245 | 249 | 292 | 294 | 196 | 204 | 220 | 220 |
| 06rbl.163 | 137 | 137 | 76 | 76 | 144 | 176 | 224 | 248 | 237 | 239 | 294 | 300 | 200 | 200 | 220 | 250 |
| 06rbl.167 | 137 | 137 | 76 | 76 | 144 | 158 | 224 | 232 | 239 | 247 | 296 | 302 | 196 | 202 | 220 | 232 |
| 06rbl.168 | 137 | 137 | 76 | 76 | 158 | 162 | 222 | 224 | 239 | 245 | 296 | 302 | 160 | 196 | 220 | 238 |
| 06rbl.180 | 137 | 137 | 76 | 76 | 144 | 162 | 226 | 232 | 245 | 249 | 302 | 306 | 160 | 202 | 228 | 228 |
| 06rbl.187 | 137 | 137 | 76 | 78 | 156 | 158 | 222 | 224 | 247 | 251 | 294 | 304 | 202 | 208 | 220 | 220 |
| 06rbl.191 | 137 | 137 | 76 | 76 | 144 | 164 | 248 | 248 | 247 | 247 | 300 | 302 | 180 | 200 | 212 | 234 |
| 06rbl.201 | 135 | 137 | 76 | 76 | 152 | 156 | 226 | 240 | 239 | 247 | 298 | 302 | 200 | 200 | 236 | 242 |
| 06rbl.203 | 137 | 137 | 72 | 76 | 144 | 144 | 222 | 222 | 241 | 245 | 298 | 302 | 202 | 212 | 236 | 250 |
| 06rbl.206 | 137 | 137 | 76 | 76 | 144 | 158 | 222 | 232 | 245 | 249 | 296 | 308 | 160 | 200 | 212 | 216 |
| 06rbl.211 | 137 | 137 | 76 | 76 | 144 | 156 | 224 | 230 | 235 | 249 | 298 | 308 | 200 | 200 | 218 | 220 |
| 06rbl.231 | 137 | 137 | 76 | 78 | 144 | 144 | 230 | 230 | 247 | 251 | 296 | 298 | 204 | 204 | 234 | 246 |
| 06rbl.245 | 137 | 137 | 76 | 76 | 140 | 144 | 214 | 224 | 237 | 249 | 298 | 298 | 200 | 206 | 220 | 236 |
| 06rbl.247 | 137 | 137 | 72 | 76 | 144 | 158 | 220 | 230 | 241 | 245 | 300 | 302 | 200 | 206 | 236 | 236 |
| 06rbl.251 | 137 | 137 | 76 | 76 | 144 | 156 | 224 | 224 | 245 | 249 | 296 | 296 | 206 | 208 | 238 | 238 |
| 06rbl.252 | 137 | 137 | 76 | 76 | 144 | 144 | 230 | 230 | 245 | 251 | 294 | 310 | 202 | 204 | 220 | 236 |
| 06rbl.257 | 137 | 137 | 76 | 76 | 144 | 144 | 230 | 236 | 239 | 249 | 296 | 298 | 204 | 206 | 218 | 234 |
| 06rbl.258 | 137 | 137 | 76 | 76 | 144 | 154 | 224 | 232 | 245 | 245 | 298 | 302 | 204 | 206 | 220 | 238 |
| 06rbl.271 | 137 | 137 | 76 | 76 | 144 | 156 | 224 | 236 | 241 | 241 | 298 | 302 | 202 | 210 | 234 | 238 |
| 06rbl.273 | 137 | 137 | 76 | 76 | 144 | 144 | 230 | 230 | 245 | 249 | 296 | 310 | 198 | 202 | 236 | 242 |
| 06rbl.278 | 137 | 137 | 76 | 76 | 144 | 158 | 220 | 220 | 245 | 251 | 296 | 300 | 196 | 198 | 238 | 252 |
| 06rbl.283 | 137 | 137 | 76 | 76 | 144 | 158 | 230 | 238 | 249 | 257 | 308 | 308 | 196 | 204 | 218 | 258 |
| 06rbl.286 | 137 | 137 | 76 | 76 | 144 | 144 | 224 | 240 | 239 | 247 | 300 | 306 | 196 | 204 | 220 | 220 |
| 06rbl.288 | 137 | 137 | 76 | 76 | 144 | 158 | 240 | 242 | 239 | 249 | 296 | 296 | 198 | 200 | 222 | 240 |
| 06rbl.295 | 137 | 137 | 76 | 76 | 144 | 158 | 220 | 236 | 249 | 249 | 300 | 304 | 200 | 200 | 212 | 236 |
| 06rbl.301 | 137 | 137 | 74 | 76 | 144 | 150 | 224 | 224 | 245 | 249 | 304 | 312 | 200 | 206 | 222 | 252 |
| 06rbl.315 | 137 | 137 | 72 | 76 | 144 | 144 | 222 | 238 | 239 | 251 | 296 | 296 | 194 | 200 | 228 | 238 |
| 06rbl.317 | 137 | 137 | 76 | 76 | 144 | 144 | 230 | 248 | 243 | 249 | 298 | 302 | 198 | 200 | 212 | 236 |
| 06rbl.319 | 137 | 137 | 76 | 76 | 158 | 188 | 224 | 234 | 239 | 253 | 296 | 300 | 204 | 204 | 212 | 248 |
| 06rbl.320 | 137 | 137 | 76 | 78 | 144 | 152 | 230 | 246 | 245 | 249 | 300 | 304 | 196 | 204 | 222 | 238 |
| 06rbl.321 | 137 | 137 | 76 | 76 | 144 | 144 | 224 | 230 | 249 | 251 | 298 | 312 | 196 | 204 | 240 | 252 |
| 06rbl.322 | 137 | 137 | 76 | 76 | 144 | 144 | 230 | 230 | 251 | 251 | 294 | 302 | 204 | 206 | 212 | 234 |
| 06rbl.329 | 135 | 135 | 76 | 76 | 172 | 198 | 224 | 264 | 241 | 247 | 300 | 302 | 198 | 202 | 220 | 222 |
| 06rbl.336 | 137 | 137 | 76 | 76 | 144 | 144 | 224 | 242 | 243 | 243 | 296 | 302 | 196 | 208 | 218 | 220 |

|           |     |     |    |    |     |     |     |     |     |     |     |     |     |     |     |     |
|-----------|-----|-----|----|----|-----|-----|-----|-----|-----|-----|-----|-----|-----|-----|-----|-----|
| 06rbl.339 | 137 | 137 | 76 | 76 | 144 | 144 | 228 | 262 | 239 | 241 | 296 | 310 | 200 | 200 | 234 | 234 |
| 06rbl.341 | 137 | 137 | 76 | 76 | 144 | 144 | 222 | 236 | 241 | 253 | 298 | 302 | 196 | 202 | 236 | 238 |
| 06rbl.349 | 137 | 137 | 76 | 76 | 164 | 164 | 230 | 248 | 247 | 253 | 298 | 298 | 200 | 202 | 234 | 240 |
| 06rbl.355 | 137 | 137 | 76 | 76 | 144 | 144 | 230 | 238 | 247 | 247 | 294 | 296 | 196 | 198 | 222 | 238 |
| 06rbl.356 | 137 | 137 | 76 | 76 | 144 | 154 | 222 | 230 | 241 | 243 | 296 | 300 | 196 | 202 | 228 | 240 |
| 06rbl.372 | 137 | 137 | 76 | 76 | 144 | 144 | 220 | 230 | 241 | 249 | 296 | 298 | 198 | 202 | 222 | 240 |
| 06rbl.375 | 137 | 137 | 76 | 76 | 144 | 166 | 224 | 224 | 247 | 249 | 294 | 296 | 180 | 200 | 234 | 242 |
| 06rbl.382 | 137 | 137 | 76 | 76 | 144 | 158 | 242 | 266 | 241 | 247 | 296 | 298 | 204 | 206 | 222 | 242 |
| 06rbl.383 | 135 | 137 | 76 | 76 | 150 | 156 | 230 | 238 | 241 | 249 | 288 | 298 | 160 | 200 | 238 | 246 |
| 06rbl.386 | 137 | 137 | 76 | 76 | 144 | 144 | 238 | 266 | 241 | 251 | 298 | 298 | 202 | 204 | 220 | 246 |
| 06rbl.388 | 137 | 137 | 76 | 76 | 144 | 144 | 220 | 230 | 247 | 251 | 300 | 306 | 206 | 212 | 236 | 238 |
| 06rbl.389 | 137 | 137 | 76 | 76 | 144 | 144 | 224 | 224 | 237 | 249 | 304 | 304 | 196 | 204 | 222 | 250 |
| 06rbl.390 | 137 | 137 | 76 | 76 | 156 | 156 | 220 | 240 | 251 | 253 | 302 | 302 | 202 | 208 | 238 | 240 |
| 06rbl.391 | 137 | 137 | 76 | 78 | 144 | 144 | 222 | 230 | 251 | 253 | 296 | 300 | 204 | 204 | 222 | 222 |
| 06rbl.395 | 137 | 137 | 76 | 76 | 144 | 166 | 224 | 230 | 241 | 247 | 294 | 298 | 204 | 206 | 242 | 246 |
| 06rbl.397 | 137 | 137 | 76 | 76 | 150 | 156 | 232 | 232 | 241 | 241 | 288 | 298 | 202 | 204 | 220 | 238 |
| 06rbl.420 | 135 | 137 | 76 | 76 | 144 | 144 | 232 | 260 | 241 | 249 | 294 | 300 | 198 | 204 | 238 | 238 |
| 06rbl.421 | 137 | 137 | 76 | 76 | 144 | 158 | 224 | 248 | 241 | 251 | 294 | 296 | 196 | 198 | 192 | 234 |
| 06rbl.424 | 137 | 137 | 76 | 76 | 144 | 158 | 222 | 232 | 241 | 251 | 302 | 302 | 202 | 202 | 214 | 238 |
| 06rbl.452 | 137 | 137 | 76 | 76 | 144 | 158 | 220 | 220 | 245 | 247 | 298 | 306 | 202 | 202 | 220 | 254 |
| 06rbl.460 | 137 | 137 | 76 | 76 | 144 | 150 | 222 | 224 | 239 | 245 | 296 | 302 | 196 | 208 | 220 | 236 |
| 06rbl.469 | 137 | 137 | 76 | 76 | 144 | 144 | 222 | 238 | 235 | 247 | 296 | 306 | 196 | 196 | 224 | 232 |
| 06rbl.471 | 137 | 137 | 76 | 76 | 144 | 156 | 220 | 232 | 245 | 245 | 300 | 300 | 202 | 204 | 192 | 232 |
| 06rbl.475 | 137 | 137 | 74 | 76 | 144 | 144 | 226 | 230 | 239 | 245 | 294 | 306 | 202 | 204 | 218 | 248 |
| 06rbl.478 | 137 | 137 | 76 | 76 | 144 | 144 | 224 | 238 | 245 | 249 | 300 | 320 | 202 | 204 | 238 | 246 |
| 06rbl.481 | 137 | 137 | 76 | 76 | 144 | 144 | 220 | 230 | 245 | 245 | 296 | 312 | 204 | 206 | 192 | 248 |
| 06rbl.488 | 137 | 137 | 76 | 76 | 144 | 144 | 222 | 232 | 245 | 245 | 298 | 302 | 196 | 200 | 212 | 236 |
| 06rbl.495 | 137 | 137 | 76 | 78 | 144 | 156 | 224 | 246 | 245 | 245 | 298 | 302 | 200 | 202 | 236 | 238 |
| 06rbl.501 | 137 | 137 | 76 | 78 | 144 | 144 | 230 | 230 | 245 | 245 | 296 | 298 | 202 | 204 | 212 | 220 |
| 06rbl.508 | 137 | 137 | 76 | 78 | 144 | 144 | 224 | 234 | 241 | 245 | 300 | 302 | 200 | 200 | 212 | 240 |
| 06rbl.509 | 137 | 137 | 76 | 76 | 158 | 160 | 230 | 238 | 251 | 255 | 298 | 302 | 206 | 210 | 222 | 232 |
| 06rbl.515 | 137 | 137 | 76 | 78 | 144 | 158 | 232 | 238 | 235 | 245 | 298 | 304 | 196 | 198 | 222 | 224 |
| 06rbl.522 | 137 | 137 | 76 | 78 | 144 | 144 | 222 | 230 | 247 | 249 | 296 | 306 | 200 | 204 | 236 | 238 |
| 06rbl.526 | 137 | 137 | 76 | 76 | 144 | 144 | 226 | 232 | 241 | 249 | 296 | 306 | 196 | 202 | 230 | 240 |
| 06rbl.534 | 135 | 137 | 76 | 76 | 152 | 152 | 230 | 256 | 241 | 253 | 296 | 298 | 196 | 202 | 222 | 236 |
| 06rbl.536 | 137 | 137 | 76 | 76 | 144 | 144 | 224 | 238 | 241 | 249 | 304 | 304 | 198 | 208 | 236 | 252 |
| 06rbl.545 | 137 | 137 | 76 | 76 | 144 | 144 | 212 | 238 | 241 | 251 | 300 | 302 | 198 | 198 | 218 | 236 |

|           |     |     |    |    |     |     |     |     |     |     |     |     |     |     |     |     |
|-----------|-----|-----|----|----|-----|-----|-----|-----|-----|-----|-----|-----|-----|-----|-----|-----|
| 06rbl.548 | 137 | 137 | 76 | 76 | 144 | 144 | 240 | 240 | 247 | 249 | 300 | 304 | 198 | 202 | 212 | 244 |
| 06rbl.551 | 137 | 137 | 76 | 76 | 144 | 158 | 212 | 224 | 241 | 247 | 300 | 302 | 198 | 204 | 220 | 242 |
| 06rbl.552 | 137 | 137 | 76 | 76 | 144 | 156 | 220 | 244 | 241 | 249 | 298 | 302 | 198 | 206 | 218 | 234 |
| 06rbl.553 | 137 | 137 | 76 | 78 | 144 | 144 | 230 | 230 | 249 | 249 | 296 | 302 | 202 | 204 | 234 | 236 |
| 06rbl.565 | 137 | 137 | 76 | 76 | 156 | 156 | 236 | 248 | 241 | 243 | 300 | 300 | 198 | 206 | 220 | 238 |
| 06rbl.568 | 137 | 137 | 76 | 76 | 144 | 162 | 228 | 238 | 241 | 249 | 300 | 306 | 202 | 202 | 218 | 232 |
| 06rbl.577 | 137 | 137 | 76 | 76 | 156 | 158 | 224 | 234 | 237 | 247 | 300 | 302 | 204 | 208 | 224 | 232 |
| 06rbl.579 | 137 | 137 | 76 | 76 | 144 | 144 | 242 | 244 | 239 | 249 | 298 | 298 | 202 | 206 | 192 | 220 |
| 06rbl.580 | 137 | 137 | 76 | 76 | 144 | 144 | 224 | 236 | 235 | 249 | 300 | 306 | 198 | 202 | 234 | 236 |
| 06rbl.581 | 137 | 137 | 76 | 78 | 176 | 176 | 214 | 226 | 251 | 251 | 302 | 304 | 202 | 212 | 226 | 252 |
| 06rbl.583 | 137 | 137 | 76 | 76 | 164 | 164 | 222 | 234 | 239 | 239 | 298 | 302 | 202 | 206 | 242 | 250 |
| 06rbl.584 | 137 | 137 | 76 | 76 | 144 | 160 | 222 | 238 | 239 | 253 | 300 | 304 | 204 | 206 | 238 | 260 |
| 06rbl.588 | 137 | 137 | 76 | 76 | 144 | 144 | 222 | 234 | 249 | 251 | 302 | 302 | 200 | 204 | 228 | 240 |
| 06rbl.590 | 137 | 137 | 76 | 76 | 158 | 158 | 224 | 230 | 247 | 249 | 296 | 306 | 198 | 200 | 236 | 250 |
| 06rbl.598 | 137 | 137 | 76 | 78 | 144 | 158 | 230 | 230 | 237 | 247 | 300 | 302 | 196 | 202 | 192 | 234 |
| 06rbl.600 | 137 | 137 | 76 | 76 | 144 | 144 | 220 | 224 | 239 | 247 | 302 | 304 | 204 | 212 | 228 | 230 |
| 06rbl.611 | 137 | 137 | 76 | 76 | 144 | 144 | 224 | 224 | 239 | 243 | 304 | 312 | 160 | 196 | 220 | 236 |
| 06rbl.623 | 137 | 137 | 76 | 76 | 144 | 156 | 220 | 224 | 241 | 245 | 298 | 306 | 206 | 208 | 222 | 238 |
| 06rbl.628 | 137 | 137 | 76 | 76 | 144 | 144 | 230 | 230 | 247 | 249 | 302 | 308 | 202 | 202 | 242 | 250 |
| 07rbl.001 | 135 | 137 | 76 | 76 | 144 | 144 | 222 | 228 | 245 | 247 | 302 | 304 | 198 | 202 | 212 | 222 |
| 07rbl.003 | 137 | 137 | 76 | 76 | 144 | 158 | 230 | 242 | 245 | 249 | 296 | 302 | 200 | 202 | 192 | 220 |
| 07rbl.007 | 137 | 137 | 76 | 76 | 156 | 156 | 222 | 248 | 247 | 249 | 292 | 300 | 202 | 206 | 224 | 238 |
| 07rbl.008 | 137 | 137 | 76 | 76 | 144 | 144 | 238 | 238 | 247 | 249 | 296 | 318 | 200 | 206 | 230 | 252 |
| 07rbl.009 | 137 | 137 | 76 | 76 | 144 | 144 | 230 | 242 | 237 | 247 | 296 | 298 | 202 | 206 | 192 | 220 |
| 07rbl.010 | 137 | 137 | 76 | 76 | 144 | 164 | 226 | 230 | 245 | 249 | 296 | 302 | 200 | 200 | 192 | 222 |
| 07rbl.014 | 137 | 137 | 76 | 76 | 144 | 156 | 224 | 224 | 237 | 249 | 292 | 298 | 196 | 198 | 238 | 238 |
| 07rbl.015 | 137 | 137 | 76 | 76 | 152 | 162 | 220 | 242 | 247 | 255 | 296 | 302 | 202 | 202 | 192 | 236 |
| 07rbl.016 | 137 | 137 | 76 | 76 | 152 | 156 | 224 | 230 | 247 | 255 | 296 | 298 | 200 | 202 | 222 | 240 |
| 07rbl.019 | 137 | 137 | 76 | 78 | 144 | 156 | 222 | 230 | 235 | 249 | 298 | 298 | 202 | 202 | 236 | 238 |
| 07rbl.021 | 137 | 137 | 76 | 76 | 152 | 156 | 220 | 224 | 241 | 245 | 294 | 298 | 198 | 200 | 222 | 234 |
| 07rbl.023 | 135 | 135 | 76 | 76 | 144 | 152 | 230 | 230 | 245 | 247 | 294 | 294 | 160 | 202 | 234 | 250 |
| 07rbl.024 | 137 | 137 | 76 | 76 | 144 | 144 | 230 | 234 | 245 | 245 | 286 | 294 | 202 | 206 | 220 | 238 |
| 07rbl.028 | 135 | 137 | 76 | 76 | 144 | 144 | 222 | 238 | 237 | 247 | 274 | 292 | 160 | 200 | 226 | 242 |
| 07rbl.029 | 137 | 137 | 76 | 76 | 152 | 156 | 222 | 242 | 239 | 245 | 300 | 300 | 200 | 202 | 192 | 216 |
| 07rbl.033 | 137 | 137 | 76 | 76 | 144 | 144 | 228 | 230 | 249 | 249 | 296 | 302 | 198 | 206 | 198 | 234 |
| 07rbl.045 | 135 | 137 | 76 | 76 | 144 | 144 | 230 | 252 | 249 | 249 | 294 | 300 | 196 | 198 | 212 | 220 |
| 07rbl.051 | 135 | 137 | 76 | 76 | 156 | 156 | 224 | 230 | 241 | 251 | 296 | 302 | 196 | 206 | 218 | 232 |

|           |     |     |    |    |     |     |     |     |     |     |     |     |     |     |     |     |
|-----------|-----|-----|----|----|-----|-----|-----|-----|-----|-----|-----|-----|-----|-----|-----|-----|
| 07rbl.054 | 137 | 137 | 76 | 76 | 144 | 160 | 212 | 238 | 243 | 247 | 294 | 298 | 200 | 200 | 220 | 232 |
| 07rbl.055 | 137 | 137 | 76 | 76 | 144 | 144 | 224 | 230 | 235 | 247 | 296 | 306 | 196 | 208 | 224 | 234 |
| 07rbl.057 | 137 | 137 | 76 | 78 | 144 | 156 | 230 | 238 | 245 | 255 | 300 | 310 | 196 | 206 | 214 | 234 |
| 07rbl.058 | 137 | 137 | 76 | 76 | 144 | 152 | 224 | 248 | 239 | 247 | 302 | 304 | 202 | 202 | 222 | 226 |
| 07rbl.060 | 135 | 137 | 76 | 76 | 144 | 158 | 228 | 230 | 237 | 249 | 298 | 304 | 196 | 202 | 236 | 258 |
| 07rbl.063 | 135 | 137 | 76 | 76 | 144 | 160 | 230 | 236 | 245 | 251 | 296 | 302 | 200 | 202 | 232 | 234 |
| 07rbl.067 | 137 | 137 | 76 | 76 | 144 | 144 | 220 | 238 | 235 | 239 | 294 | 308 | 198 | 200 | 236 | 242 |
| 07rbl.069 | 137 | 137 | 76 | 76 | 156 | 164 | 224 | 238 | 241 | 247 | 298 | 304 | 198 | 202 | 192 | 232 |
| 07rbl.070 | 135 | 137 | 76 | 76 | 144 | 160 | 222 | 224 | 245 | 255 | 298 | 302 | 196 | 204 | 240 | 240 |
| 07rbl.072 | 137 | 137 | 76 | 76 | 144 | 156 | 230 | 230 | 241 | 245 | 292 | 296 | 196 | 206 | 220 | 226 |
| 07rbl.073 | 137 | 137 | 76 | 76 | 144 | 152 | 224 | 230 | 245 | 249 | 296 | 304 | 200 | 202 | 222 | 224 |
| 07rbl.076 | 137 | 137 | 76 | 76 | 144 | 158 | 224 | 242 | 247 | 249 | 302 | 306 | 196 | 206 | 220 | 232 |
| 07rbl.078 | 137 | 137 | 76 | 76 | 144 | 156 | 226 | 226 | 249 | 251 | 296 | 302 | 160 | 200 | 234 | 238 |
| 07rbl.080 | 135 | 137 | 76 | 76 | 144 | 144 | 244 | 248 | 239 | 247 | 298 | 300 | 196 | 200 | 192 | 194 |
| 07rbl.082 | 135 | 137 | 76 | 76 | 144 | 144 | 222 | 232 | 241 | 245 | 296 | 302 | 200 | 200 | 218 | 236 |
| 07rbl.083 | 137 | 137 | 72 | 76 | 158 | 162 | 224 | 224 | 239 | 247 | 290 | 302 | 200 | 200 | 192 | 234 |
| 07rbl.085 | 137 | 137 | 74 | 76 | 144 | 154 | 224 | 240 | 249 | 253 | 300 | 300 | 196 | 200 | 220 | 228 |
| 07rbl.089 | 137 | 137 | 76 | 76 | 156 | 160 | 224 | 240 | 245 | 249 | 298 | 304 | 202 | 208 | 220 | 236 |
| 07rbl.091 | 137 | 137 | 76 | 76 | 144 | 144 | 222 | 228 | 245 | 245 | 296 | 300 | 160 | 198 | 216 | 236 |
| 07rbl.094 | 137 | 137 | 76 | 78 | 144 | 158 | 222 | 228 | 239 | 249 | 294 | 298 | 202 | 202 | 220 | 252 |
| 07rbl.095 | 137 | 137 | 76 | 76 | 144 | 164 | 226 | 240 | 239 | 251 | 288 | 300 | 202 | 204 | 216 | 236 |
| 07rbl.097 | 137 | 137 | 76 | 76 | 144 | 144 | 224 | 226 | 245 | 251 | 302 | 304 | 200 | 200 | 232 | 234 |
| 07rbl.099 | 135 | 137 | 76 | 76 | 144 | 156 | 222 | 238 | 239 | 245 | 300 | 302 | 200 | 200 | 222 | 248 |
| 07rbl.106 | 135 | 137 | 76 | 78 | 144 | 144 | 224 | 230 | 245 | 255 | 304 | 306 | 200 | 202 | 232 | 236 |
| 07rbl.110 | 135 | 137 | 76 | 78 | 144 | 156 | 222 | 230 | 241 | 249 | 298 | 306 | 200 | 210 | 238 | 238 |
| 07rbl.111 | 137 | 137 | 76 | 76 | 144 | 180 | 222 | 230 | 239 | 245 | 300 | 302 | 202 | 206 | 220 | 234 |
| 07rbl.113 | 137 | 137 | 76 | 76 | 144 | 156 | 222 | 222 | 247 | 251 | 296 | 296 | 200 | 200 | 228 | 236 |
| 07rbl.118 | 137 | 137 | 76 | 76 | 144 | 156 | 226 | 242 | 239 | 247 | 294 | 298 | 200 | 206 | 212 | 236 |
| 07rbl.122 | 137 | 137 | 76 | 78 | 144 | 156 | 224 | 230 | 235 | 241 | 300 | 300 | 196 | 200 | 220 | 240 |
| 07rbl.123 | 137 | 137 | 76 | 76 | 144 | 166 | 224 | 248 | 237 | 251 | 292 | 296 | 202 | 202 | 226 | 226 |
| 07rbl.124 | 137 | 137 | 76 | 76 | 144 | 164 | 240 | 248 | 247 | 247 | 296 | 300 | 206 | 210 | 216 | 220 |
| 07rbl.125 | 137 | 137 | 76 | 76 | 144 | 156 | 224 | 248 | 245 | 247 | 292 | 298 | 204 | 206 | 222 | 244 |
| 07rbl.130 | 137 | 137 | 76 | 76 | 144 | 156 | 242 | 242 | 237 | 247 | 298 | 298 | 196 | 200 | 244 | 246 |
| 07rbl.132 | 135 | 137 | 76 | 76 | 144 | 144 | 230 | 234 | 239 | 251 | 298 | 298 | 206 | 208 | 214 | 242 |
| 07rbl.136 | 137 | 137 | 76 | 76 | 154 | 156 | 222 | 230 | 247 | 249 | 300 | 302 | 160 | 200 | 214 | 224 |
| 07rbl.139 | 137 | 137 | 76 | 78 | 144 | 156 | 230 | 230 | 235 | 247 | 298 | 298 | 202 | 206 | 212 | 220 |
| 07rbl.144 | 137 | 137 | 76 | 76 | 144 | 144 | 222 | 230 | 239 | 249 | 300 | 302 | 200 | 202 | 236 | 238 |

|           |     |     |    |    |     |     |     |     |     |     |     |     |     |     |     |     |
|-----------|-----|-----|----|----|-----|-----|-----|-----|-----|-----|-----|-----|-----|-----|-----|-----|
| 07rbl.152 | 137 | 137 | 76 | 78 | 144 | 156 | 226 | 242 | 235 | 245 | 296 | 304 | 202 | 206 | 236 | 236 |
| 07rbl.158 | 135 | 137 | 76 | 76 | 144 | 164 | 226 | 230 | 237 | 251 | 292 | 296 | 196 | 196 | 214 | 222 |
| 07rbl.159 | 137 | 137 | 76 | 76 | 144 | 144 | 226 | 232 | 245 | 253 | 296 | 308 | 194 | 204 | 222 | 238 |
| 07rbl.164 | 137 | 137 | 76 | 76 | 144 | 144 | 222 | 232 | 237 | 239 | 296 | 298 | 200 | 200 | 212 | 236 |
| 07rbl.167 | 137 | 137 | 76 | 76 | 144 | 144 | 236 | 244 | 245 | 249 | 274 | 296 | 198 | 202 | 236 | 236 |
| 07rbl.168 | 137 | 137 | 76 | 76 | 144 | 144 | 226 | 238 | 245 | 251 | 294 | 306 | 194 | 198 | 236 | 238 |
| 07rbl.171 | 137 | 137 | 76 | 76 | 156 | 172 | 214 | 242 | 241 | 249 | 296 | 300 | 196 | 196 | 236 | 236 |
| 07rbl.179 | 137 | 137 | 76 | 76 | 144 | 152 | 240 | 244 | 245 | 245 | 296 | 300 | 200 | 202 | 238 | 254 |
| 07rbl.180 | 137 | 137 | 76 | 76 | 144 | 174 | 224 | 236 | 247 | 249 | 296 | 296 | 198 | 200 | 238 | 248 |
| 07rbl.182 | 137 | 137 | 76 | 78 | 144 | 156 | 230 | 242 | 239 | 245 | 298 | 302 | 198 | 210 | 220 | 250 |
| 07rbl.183 | 137 | 137 | 76 | 78 | 144 | 156 | 224 | 238 | 239 | 245 | 294 | 296 | 196 | 200 | 220 | 248 |
| 07rbl.186 | 137 | 137 | 76 | 76 | 144 | 144 | 222 | 244 | 241 | 249 | 302 | 302 | 204 | 204 | 202 | 220 |
| 07rbl.187 | 137 | 137 | 72 | 76 | 144 | 144 | 222 | 238 | 245 | 247 | 296 | 296 | 200 | 206 | 192 | 240 |
| 07rbl.188 | 135 | 137 | 76 | 76 | 144 | 174 | 222 | 224 | 237 | 239 | 292 | 300 | 196 | 204 | 220 | 252 |
| 07rbl.189 | 135 | 137 | 76 | 76 | 144 | 156 | 222 | 232 | 245 | 249 | 292 | 304 | 160 | 206 | 220 | 234 |
| 07rbl.192 | 137 | 137 | 76 | 76 | 156 | 174 | 232 | 234 | 237 | 247 | 294 | 300 | 196 | 204 | 242 | 244 |
| 07rbl.195 | 137 | 137 | 76 | 76 | 144 | 144 | 222 | 238 | 239 | 239 | 294 | 296 | 202 | 202 | 218 | 234 |
| 07rbl.196 | 137 | 137 | 76 | 76 | 144 | 156 | 226 | 228 | 237 | 237 | 304 | 306 | 200 | 202 | 232 | 236 |
| 07rbl.203 | 137 | 137 | 72 | 76 | 144 | 144 | 224 | 232 | 247 | 251 | 296 | 298 | 200 | 202 | 220 | 258 |
| 07rbl.205 | 137 | 137 | 76 | 76 | 144 | 144 | 240 | 240 | 247 | 249 | 296 | 296 | 198 | 200 | 220 | 234 |
| 07rbl.210 | 137 | 137 | 76 | 76 | 152 | 160 | 240 | 240 | 241 | 245 | 290 | 298 | 206 | 206 | 220 | 226 |
| 07rbl.211 | 137 | 137 | 76 | 76 | 156 | 160 | 232 | 240 | 245 | 247 | 292 | 302 | 196 | 196 | 224 | 252 |
| 07rbl.212 | 137 | 137 | 76 | 76 | 158 | 180 | 222 | 228 | 239 | 249 | 296 | 302 | 202 | 202 | 216 | 230 |
| 07rbl.213 | 137 | 137 | 76 | 76 | 144 | 156 | 232 | 248 | 247 | 249 | 298 | 300 | 196 | 202 | 234 | 270 |
| 07rbl.214 | 137 | 137 | 76 | 76 | 144 | 168 | 224 | 232 | 247 | 253 | 300 | 302 | 196 | 200 | 242 | 254 |
| 07rbl.215 | 135 | 137 | 76 | 76 | 144 | 162 | 224 | 236 | 239 | 245 | 300 | 302 | 196 | 196 | 238 | 252 |
| 07rbl.217 | 137 | 137 | 76 | 76 | 144 | 158 | 224 | 238 | 247 | 251 | 296 | 300 | 204 | 204 | 222 | 238 |
| 07rbl.219 | 137 | 137 | 76 | 76 | 156 | 164 | 230 | 232 | 245 | 245 | 296 | 298 | 202 | 202 | 212 | 238 |
| 07rbl.220 | 137 | 137 | 76 | 78 | 144 | 156 | 224 | 230 | 245 | 251 | 298 | 300 | 198 | 202 | 220 | 234 |
| 07rbl.221 | 137 | 137 | 76 | 76 | 144 | 144 | 238 | 242 | 245 | 249 | 298 | 300 | 200 | 202 | 226 | 240 |
| 07rbl.225 | 137 | 137 | 74 | 76 | 156 | 166 | 224 | 230 | 239 | 241 | 294 | 298 | 200 | 202 | 218 | 252 |
| 07rbl.229 | 137 | 137 | 76 | 76 | 144 | 176 | 224 | 240 | 247 | 249 | 294 | 298 | 198 | 202 | 212 | 218 |
| 07rbl.233 | 137 | 137 | 76 | 76 | 144 | 144 | 220 | 230 | 245 | 249 | 300 | 300 | 200 | 204 | 220 | 236 |
| 07rbl.235 | 135 | 137 | 76 | 76 | 144 | 164 | 222 | 230 | 245 | 249 | 290 | 300 | 160 | 210 | 220 | 254 |
| 07rbl.236 | 135 | 137 | 76 | 76 | 144 | 158 | 230 | 230 | 245 | 247 | 302 | 302 | 200 | 210 | 192 | 220 |
| 07rbl.238 | 137 | 137 | 76 | 76 | 144 | 156 | 222 | 238 | 239 | 239 | 296 | 296 | 202 | 202 | 220 | 250 |
| 07rbl.240 | 137 | 137 | 76 | 78 | 154 | 160 | 230 | 238 | 237 | 237 | 300 | 302 | 196 | 200 | 192 | 218 |

|           |     |     |    |    |     |     |     |     |     |     |     |     |     |     |     |     |
|-----------|-----|-----|----|----|-----|-----|-----|-----|-----|-----|-----|-----|-----|-----|-----|-----|
| 07rbl.242 | 137 | 137 | 76 | 76 | 144 | 144 | 240 | 240 | 247 | 247 | 298 | 300 | 160 | 206 | 218 | 220 |
| 07rbl.243 | 137 | 137 | 76 | 76 | 144 | 144 | 228 | 252 | 249 | 249 | 298 | 302 | 200 | 200 | 224 | 238 |
| 07rbl.245 | 137 | 137 | 76 | 76 | 144 | 156 | 234 | 240 | 253 | 253 | 300 | 304 | 204 | 204 | 220 | 220 |
| 07rbl.251 | 137 | 137 | 76 | 78 | 144 | 156 | 222 | 238 | 239 | 245 | 300 | 300 | 200 | 200 | 226 | 234 |
| 07rbl.255 | 135 | 137 | 72 | 76 | 144 | 162 | 230 | 230 | 245 | 247 | 298 | 298 | 180 | 202 | 212 | 250 |
| 07rbl.258 | 137 | 137 | 76 | 76 | 144 | 144 | 220 | 226 | 245 | 247 | 300 | 308 | 160 | 206 | 228 | 234 |
| 07rbl.259 | 137 | 137 | 76 | 78 | 144 | 144 | 222 | 230 | 239 | 251 | 300 | 304 | 200 | 202 | 240 | 252 |
| 07rbl.262 | 137 | 137 | 76 | 76 | 144 | 156 | 230 | 248 | 235 | 245 | 300 | 300 | 196 | 202 | 220 | 252 |
| 07rbl.264 | 137 | 137 | 72 | 76 | 144 | 156 | 222 | 230 | 241 | 249 | 304 | 306 | 210 | 210 | 232 | 238 |
| 07rbl.266 | 137 | 137 | 76 | 76 | 152 | 156 | 236 | 238 | 241 | 249 | 300 | 302 | 204 | 204 | 220 | 252 |
| 07rbl.269 | 137 | 137 | 72 | 76 | 144 | 144 | 226 | 232 | 241 | 249 | 302 | 302 | 160 | 202 | 218 | 238 |
| 07rbl.271 | 137 | 137 | 76 | 76 | 144 | 156 | 230 | 240 | 235 | 249 | 300 | 306 | 198 | 202 | 220 | 226 |
| 07rbl.272 | 135 | 137 | 76 | 76 | 144 | 158 | 222 | 222 | 237 | 245 | 296 | 298 | 200 | 202 | 190 | 226 |
| 07rbl.275 | 137 | 137 | 76 | 76 | 144 | 156 | 222 | 222 | 247 | 251 | 300 | 306 | 196 | 206 | 222 | 240 |
| 07rbl.278 | 137 | 137 | 76 | 76 | 144 | 156 | 224 | 248 | 247 | 249 | 302 | 304 | 200 | 202 | 216 | 238 |
| 07rbl.279 | 137 | 137 | 76 | 78 | 144 | 156 | 230 | 248 | 247 | 249 | 294 | 302 | 200 | 202 | 222 | 238 |
| 07rbl.281 | 137 | 137 | 76 | 76 | 144 | 156 | 224 | 226 | 237 | 249 | 292 | 292 | 202 | 204 | 238 | 250 |
| 07rbl.284 | 137 | 137 | 76 | 76 | 144 | 158 | 224 | 234 | 245 | 249 | 292 | 300 | 204 | 206 | 238 | 238 |
| 07rbl.286 | 137 | 137 | 76 | 78 | 144 | 152 | 222 | 230 | 247 | 249 | 296 | 300 | 200 | 200 | 234 | 260 |
| 07rbl.290 | 137 | 137 | 76 | 76 | 144 | 156 | 224 | 228 | 239 | 251 | 298 | 302 | 202 | 202 | 220 | 236 |
| 07rbl.295 | 137 | 137 | 76 | 76 | 144 | 158 | 230 | 236 | 237 | 249 | 292 | 302 | 194 | 200 | 220 | 234 |
| 07rbl.296 | 137 | 137 | 76 | 76 | 144 | 156 | 218 | 224 | 245 | 245 | 304 | 308 | 196 | 200 | 230 | 240 |
| 07rbl.300 | 137 | 137 | 76 | 76 | 144 | 176 | 222 | 232 | 237 | 247 | 298 | 300 | 202 | 204 | 234 | 234 |
| 07rbl.301 | 137 | 137 | 76 | 76 | 144 | 156 | 214 | 242 | 239 | 251 | 290 | 300 | 200 | 200 | 220 | 226 |
| 07rbl.302 | 137 | 137 | 76 | 76 | 144 | 152 | 222 | 224 | 245 | 249 | 292 | 304 | 202 | 210 | 234 | 238 |
| 07rbl.303 | 137 | 137 | 76 | 78 | 144 | 156 | 230 | 246 | 247 | 251 | 296 | 302 | 200 | 202 | 234 | 240 |
| 07rbl.304 | 135 | 137 | 76 | 76 | 144 | 156 | 220 | 230 | 241 | 251 | 296 | 304 | 196 | 202 | 212 | 254 |
| 07rbl.309 | 135 | 137 | 76 | 76 | 144 | 156 | 226 | 238 | 237 | 245 | 300 | 310 | 160 | 200 | 220 | 234 |
| 08rbl.011 | 135 | 137 | 76 | 76 | 144 | 152 | 226 | 230 | 235 | 247 | 298 | 300 | 160 | 196 | 220 | 244 |
| 08rbl.015 | 135 | 137 | 76 | 76 | 144 | 144 | 220 | 230 | 245 | 247 | 300 | 304 | 198 | 200 | 234 | 234 |
| 08rbl.020 | 135 | 137 | 76 | 76 | 144 | 144 | 222 | 238 | 235 | 249 | 298 | 300 | 202 | 208 | 220 | 240 |
| 08rbl.021 | 137 | 137 | 76 | 76 | 160 | 160 | 224 | 234 | 245 | 245 | 294 | 296 | 204 | 204 | 192 | 234 |
| 08rbl.023 | 135 | 137 | 76 | 76 | 144 | 176 | 230 | 236 | 247 | 249 | 300 | 304 | 198 | 200 | 220 | 232 |
| 08rbl.025 | 137 | 137 | 76 | 76 | 144 | 164 | 222 | 230 | 235 | 245 | 300 | 302 | 160 | 200 | 194 | 220 |
| 08rbl.027 | 137 | 137 | 76 | 76 | 144 | 144 | 222 | 230 | 241 | 251 | 300 | 300 | 202 | 206 | 232 | 240 |
| 08rbl.033 | 137 | 137 | 76 | 76 | 156 | 156 | 224 | 224 | 235 | 245 | 298 | 302 | 196 | 198 | 224 | 236 |
| 08rbl.034 | 137 | 137 | 76 | 76 | 144 | 154 | 220 | 238 | 245 | 249 | 292 | 294 | 160 | 202 | 220 | 222 |

|           |     |     |    |    |     |     |     |     |     |     |     |     |     |     |     |     |
|-----------|-----|-----|----|----|-----|-----|-----|-----|-----|-----|-----|-----|-----|-----|-----|-----|
| 08rbl.041 | 135 | 137 | 72 | 76 | 144 | 144 | 224 | 244 | 241 | 251 | 298 | 302 | 200 | 210 | 212 | 238 |
| 08rbl.045 | 137 | 137 | 76 | 76 | 144 | 156 | 230 | 240 | 245 | 245 | 296 | 306 | 196 | 196 | 220 | 238 |
| 08rbl.054 | 135 | 137 | 76 | 76 | 144 | 144 | 220 | 230 | 249 | 249 | 294 | 298 | 200 | 210 | 216 | 240 |
| 08rbl.055 | 137 | 137 | 76 | 76 | 144 | 156 | 228 | 242 | 239 | 243 | 296 | 304 | 202 | 208 | 220 | 242 |
| 08rbl.059 | 137 | 137 | 76 | 76 | 144 | 144 | 234 | 240 | 239 | 247 | 294 | 298 | 200 | 206 | 236 | 256 |
| 08rbl.061 | 135 | 137 | 72 | 76 | 150 | 154 | 214 | 234 | 241 | 251 | 294 | 298 | 200 | 202 | 238 | 238 |
| 08rbl.064 | 135 | 137 | 76 | 76 | 144 | 156 | 226 | 236 | 237 | 239 | 300 | 332 | 196 | 200 | 222 | 240 |
| 08rbl.070 | 137 | 137 | 76 | 76 | 156 | 164 | 222 | 248 | 247 | 249 | 306 | 308 | 196 | 200 | 216 | 256 |
| 08rbl.074 | 137 | 137 | 76 | 76 | 144 | 144 | 236 | 236 | 235 | 241 | 302 | 304 | 204 | 204 | 226 | 228 |
| 08rbl.079 | 137 | 137 | 76 | 76 | 144 | 144 | 232 | 242 | 249 | 251 | 294 | 302 | 202 | 204 | 238 | 252 |
| 08rbl.081 | 137 | 137 | 76 | 76 | 160 | 164 | 222 | 230 | 241 | 245 | 298 | 302 | 200 | 202 | 212 | 232 |
| 08rbl.085 | 137 | 137 | 76 | 76 | 144 | 152 | 222 | 240 | 237 | 245 | 302 | 304 | 198 | 200 | 212 | 222 |
| 08rbl.124 | 137 | 137 | 76 | 76 | 144 | 144 | 236 | 238 | 239 | 255 | 296 | 306 | 194 | 198 | 238 | 252 |
| 08rbl.129 | 137 | 137 | 76 | 76 | 144 | 156 | 230 | 230 | 239 | 239 | 286 | 294 | 200 | 202 | 238 | 252 |
| 08rbl.144 | 135 | 137 | 76 | 78 | 144 | 156 | 224 | 230 | 239 | 247 | 292 | 300 | 204 | 206 | 192 | 222 |
| 08rbl.153 | 135 | 137 | 76 | 76 | 144 | 152 | 224 | 252 | 237 | 247 | 294 | 300 | 200 | 202 | 214 | 218 |
| 08rbl.155 | 135 | 137 | 76 | 76 | 144 | 174 | 224 | 228 | 243 | 251 | 304 | 310 | 200 | 210 | 234 | 238 |
| 08rbl.156 | 137 | 137 | 76 | 78 | 144 | 144 | 230 | 230 | 243 | 245 | 298 | 304 | 200 | 202 | 212 | 236 |
| 08rbl.159 | 135 | 135 | 76 | 76 | 156 | 174 | 222 | 222 | 237 | 245 | 294 | 302 | 196 | 200 | 230 | 236 |
| 08rbl.162 | 137 | 137 | 76 | 78 | 156 | 156 | 222 | 232 | 239 | 243 | 296 | 298 | 196 | 204 | 238 | 252 |
| 08rbl.165 | 137 | 137 | 76 | 76 | 144 | 164 | 230 | 232 | 247 | 251 | 292 | 296 | 200 | 202 | 220 | 222 |
| 08rbl.167 | 137 | 137 | 76 | 78 | 144 | 180 | 232 | 232 | 241 | 245 | 298 | 308 | 200 | 204 | 214 | 220 |
| 08rbl.170 | 137 | 137 | 76 | 78 | 156 | 158 | 224 | 228 | 239 | 245 | 298 | 318 | 196 | 204 | 230 | 248 |
| 08rbl.174 | 137 | 137 | 76 | 76 | 144 | 156 | 222 | 236 | 239 | 239 | 296 | 302 | 202 | 204 | 238 | 252 |
| 08rbl.175 | 137 | 137 | 76 | 76 | 156 | 156 | 230 | 240 | 241 | 249 | 296 | 296 | 196 | 204 | 234 | 238 |
| 08rbl.176 | 137 | 137 | 76 | 76 | 156 | 176 | 224 | 226 | 247 | 247 | 298 | 298 | 196 | 202 | 222 | 238 |
| 08rbl.177 | 137 | 137 | 76 | 76 | 156 | 156 | 222 | 224 | 251 | 251 | 298 | 300 | 180 | 200 | 234 | 236 |
| 08rbl.182 | 137 | 137 | 76 | 76 | 144 | 144 | 224 | 226 | 235 | 245 | 298 | 300 | 196 | 200 | 250 | 252 |
| 08rbl.189 | 137 | 137 | 76 | 76 | 156 | 156 | 232 | 232 | 241 | 245 | 296 | 296 | 188 | 200 | 234 | 236 |
| 08rbl.196 | 135 | 137 | 76 | 76 | 144 | 156 | 226 | 230 | 249 | 249 | 296 | 302 | 198 | 202 | 224 | 234 |
| 08rbl.210 | 137 | 137 | 74 | 76 | 144 | 158 | 224 | 224 | 247 | 255 | 294 | 302 | 196 | 200 | 238 | 252 |
| 08rbl.211 | 135 | 137 | 76 | 76 | 144 | 144 | 224 | 248 | 247 | 249 | 298 | 302 | 200 | 202 | 230 | 240 |
| 08rbl.215 | 135 | 137 | 76 | 76 | 144 | 156 | 230 | 252 | 243 | 247 | 298 | 298 | 208 | 212 | 232 | 236 |
| 08rbl.225 | 137 | 137 | 76 | 76 | 144 | 156 | 224 | 232 | 245 | 249 | 302 | 302 | 160 | 200 | 230 | 236 |
| 08rbl.231 | 137 | 137 | 76 | 76 | 144 | 164 | 230 | 230 | 237 | 241 | 300 | 300 | 194 | 208 | 218 | 236 |
| 08rbl.242 | 137 | 137 | 76 | 76 | 144 | 154 | 230 | 230 | 239 | 249 | 298 | 302 | 196 | 204 | 216 | 248 |
| 08rbl.244 | 137 | 137 | 76 | 76 | 144 | 144 | 222 | 242 | 245 | 249 | 294 | 302 | 200 | 202 | 222 | 238 |

|           |     |     |    |    |     |     |     |     |     |     |     |     |     |     |     |     |
|-----------|-----|-----|----|----|-----|-----|-----|-----|-----|-----|-----|-----|-----|-----|-----|-----|
| 08rbl.245 | 137 | 137 | 76 | 76 | 144 | 156 | 222 | 236 | 239 | 247 | 292 | 300 | 202 | 202 | 236 | 236 |
| 08rbl.248 | 137 | 137 | 76 | 76 | 144 | 158 | 234 | 234 | 245 | 249 | 298 | 302 | 198 | 200 | 192 | 242 |
| 08rbl.260 | 135 | 137 | 76 | 76 | 144 | 144 | 242 | 242 | 249 | 251 | 304 | 308 | 198 | 202 | 218 | 236 |
| 08rbl.277 | 135 | 137 | 76 | 76 | 144 | 176 | 230 | 238 | 245 | 247 | 296 | 296 | 200 | 202 | 232 | 238 |
| 08rbl.284 | 137 | 137 | 76 | 76 | 144 | 156 | 222 | 250 | 237 | 245 | 294 | 302 | 202 | 202 | 232 | 236 |
| 08rbl.289 | 137 | 137 | 76 | 76 | 144 | 156 | 224 | 260 | 235 | 245 | 298 | 304 | 202 | 202 | 224 | 236 |
| 08rbl.295 | 137 | 137 | 76 | 76 | 156 | 160 | 230 | 240 | 245 | 247 | 306 | 310 | 196 | 206 | 216 | 220 |
| 08rbl.302 | 135 | 137 | 76 | 76 | 144 | 144 | 222 | 230 | 239 | 241 | 304 | 330 | 196 | 202 | 218 | 236 |
| 08rbl.303 | 137 | 137 | 74 | 76 | 144 | 156 | 228 | 230 | 237 | 241 | 302 | 302 | 200 | 206 | 230 | 240 |
| 08rbl.308 | 137 | 137 | 76 | 76 | 144 | 176 | 222 | 230 | 245 | 251 | 288 | 308 | 202 | 204 | 236 | 238 |
| 08rbl.313 | 137 | 137 | 76 | 76 | 176 | 188 | 222 | 224 | 247 | 251 | 288 | 296 | 200 | 202 | 242 | 244 |
| 08rbl.315 | 137 | 137 | 76 | 76 | 144 | 156 | 224 | 230 | 235 | 245 | 292 | 294 | 160 | 196 | 234 | 252 |
| 08rbl.318 | 135 | 137 | 76 | 76 | 144 | 144 | 240 | 248 | 251 | 253 | 304 | 306 | 204 | 208 | 220 | 238 |
| 08rbl.325 | 137 | 137 | 76 | 76 | 144 | 144 | 226 | 228 | 239 | 253 | 296 | 302 | 200 | 202 | 234 | 234 |
| 08rbl.327 | 135 | 137 | 76 | 76 | 144 | 156 | 232 | 232 | 237 | 245 | 300 | 306 | 198 | 202 | 218 | 234 |
| 08rbl.337 | 137 | 137 | 76 | 76 | 144 | 160 | 226 | 244 | 245 | 249 | 292 | 300 | 204 | 210 | 226 | 230 |
| 08rbl.347 | 137 | 137 | 76 | 76 | 144 | 154 | 230 | 256 | 235 | 249 | 302 | 302 | 160 | 204 | 192 | 230 |
| 08rbl.356 | 137 | 137 | 76 | 76 | 144 | 170 | 224 | 230 | 245 | 245 | 300 | 302 | 200 | 202 | 220 | 250 |
| 08rbl.360 | 137 | 137 | 72 | 76 | 144 | 158 | 232 | 258 | 239 | 245 | 302 | 304 | 160 | 200 | 230 | 238 |
| 08rbl.363 | 137 | 137 | 76 | 76 | 158 | 166 | 220 | 256 | 249 | 251 | 296 | 306 | 202 | 204 | 216 | 234 |
| 08rbl.368 | 135 | 137 | 76 | 76 | 144 | 158 | 230 | 238 | 237 | 239 | 296 | 302 | 196 | 200 | 234 | 240 |
| 08rbl.371 | 137 | 137 | 72 | 76 | 144 | 156 | 226 | 238 | 239 | 247 | 296 | 302 | 160 | 196 | 218 | 234 |
| 08rbl.374 | 137 | 137 | 76 | 76 | 144 | 156 | 222 | 224 | 241 | 247 | 294 | 296 | 198 | 202 | 220 | 232 |
| 08rbl.380 | 137 | 137 | 76 | 76 | 144 | 156 | 230 | 230 | 239 | 245 | 300 | 302 | 196 | 204 | 226 | 234 |
| 08rbl.384 | 137 | 137 | 76 | 76 | 144 | 144 | 232 | 232 | 247 | 249 | 304 | 306 | 194 | 200 | 234 | 236 |
| 08rbl.397 | 137 | 137 | 76 | 76 | 156 | 158 | 222 | 230 | 241 | 241 | 294 | 298 | 208 | 210 | 234 | 236 |
| 08rbl.406 | 137 | 137 | 76 | 78 | 144 | 144 | 232 | 232 | 239 | 249 | 298 | 300 | 208 | 212 | 234 | 254 |
| 08rbl.412 | 137 | 137 | 76 | 76 | 152 | 156 | 224 | 230 | 249 | 255 | 296 | 302 | 206 | 206 | 234 | 246 |
| 08rbl.415 | 137 | 137 | 76 | 76 | 144 | 144 | 232 | 240 | 249 | 249 | 294 | 302 | 196 | 202 | 236 | 236 |
| 08rbl.418 | 137 | 137 | 76 | 76 | 144 | 156 | 232 | 232 | 247 | 257 | 300 | 304 | 206 | 206 | 236 | 254 |
| 08rbl.425 | 137 | 137 | 76 | 76 | 144 | 144 | 222 | 222 | 239 | 247 | 296 | 300 | 202 | 202 | 220 | 242 |
| 08rbl.430 | 137 | 137 | 76 | 76 | 144 | 152 | 224 | 232 | 247 | 247 | 292 | 304 | 200 | 204 | 220 | 252 |
| 08rbl.442 | 137 | 137 | 72 | 76 | 144 | 144 | 232 | 234 | 241 | 249 | 300 | 302 | 202 | 204 | 238 | 254 |
| 08rbl.446 | 137 | 137 | 76 | 76 | 144 | 144 | 224 | 230 | 241 | 243 | 304 | 304 | 196 | 202 | 222 | 234 |
| 08rbl.447 | 137 | 137 | 76 | 76 | 144 | 156 | 240 | 242 | 249 | 253 | 304 | 304 | 200 | 202 | 246 | 256 |
| 08rbl.449 | 137 | 137 | 76 | 78 | 144 | 162 | 240 | 242 | 237 | 239 | 298 | 304 | 204 | 204 | 194 | 246 |
| 08rbl.450 | 137 | 137 | 76 | 76 | 144 | 144 | 240 | 242 | 239 | 241 | 294 | 300 | 204 | 204 | 196 | 222 |



|           |     |     |    |    |     |     |     |     |     |     |     |     |     |     |     |     |
|-----------|-----|-----|----|----|-----|-----|-----|-----|-----|-----|-----|-----|-----|-----|-----|-----|
| 08rbl.459 | 137 | 137 | 76 | 76 | 144 | 156 | 224 | 224 | 235 | 247 | 294 | 298 | 160 | 196 | 234 | 252 |
| 08rbl.466 | 137 | 137 | 76 | 78 | 144 | 144 | 222 | 242 | 239 | 249 | 298 | 300 | 196 | 204 | 196 | 222 |
| 08rbl.467 | 137 | 137 | 76 | 76 | 158 | 158 | 222 | 228 | 239 | 243 | 296 | 308 | 196 | 196 | 244 | 252 |
| 08rbl.470 | 137 | 137 | 76 | 76 | 144 | 144 | 226 | 240 | 247 | 249 | 296 | 304 | 198 | 212 | 220 | 246 |
| 08rbl.475 | 137 | 137 | 76 | 76 | 144 | 144 | 230 | 242 | 241 | 241 | 292 | 292 | 206 | 206 | 226 | 240 |
| 08rbl.482 | 137 | 137 | 76 | 76 | 144 | 154 | 224 | 242 | 245 | 249 | 296 | 296 | 204 | 206 | 240 | 248 |
| 08rbl.487 | 137 | 137 | 76 | 76 | 144 | 180 | 224 | 240 | 237 | 241 | 294 | 298 | 196 | 206 | 220 | 220 |
| 08rbl.493 | 137 | 137 | 76 | 78 | 144 | 144 | 212 | 240 | 239 | 247 | 294 | 298 | 196 | 206 | 220 | 238 |
| 08rbl.497 | 137 | 137 | 76 | 76 | 156 | 164 | 232 | 232 | 235 | 245 | 298 | 306 | 180 | 202 | 230 | 252 |
| 08rbl.502 | 137 | 137 | 76 | 78 | 144 | 156 | 222 | 226 | 247 | 249 | 296 | 298 | 160 | 200 | 192 | 250 |
| 08rbl.508 | 137 | 137 | 76 | 76 | 144 | 152 | 226 | 232 | 239 | 247 | 300 | 300 | 196 | 208 | 218 | 236 |
| 08rbl.509 | 137 | 137 | 76 | 76 | 144 | 144 | 224 | 238 | 241 | 245 | 300 | 302 | 180 | 200 | 238 | 242 |
| 08rbl.511 | 137 | 137 | 76 | 78 | 144 | 144 | 244 | 248 | 247 | 247 | 306 | 306 | 202 | 208 | 232 | 238 |
| 08rbl.513 | 137 | 137 | 76 | 78 | 144 | 144 | 224 | 230 | 247 | 257 | 294 | 296 | 204 | 204 | 230 | 236 |
| 08rbl.516 | 135 | 137 | 76 | 76 | 144 | 152 | 248 | 248 | 247 | 249 | 292 | 300 | 202 | 208 | 220 | 250 |
| 08rbl.523 | 135 | 137 | 76 | 78 | 144 | 144 | 230 | 252 | 247 | 249 | 304 | 310 | 204 | 204 | 192 | 232 |
| 08rbl.530 | 137 | 137 | 76 | 76 | 144 | 144 | 230 | 238 | 237 | 245 | 296 | 304 | 180 | 204 | 216 | 236 |
| 08rbl.531 | 137 | 137 | 76 | 76 | 144 | 144 | 222 | 226 | 239 | 249 | 270 | 310 | 202 | 206 | 220 | 226 |
| 08rbl.532 | 135 | 137 | 76 | 76 | 152 | 156 | 248 | 260 | 245 | 247 | 294 | 296 | 200 | 200 | 234 | 244 |
| 08rbl.534 | 137 | 137 | 76 | 76 | 144 | 144 | 224 | 230 | 247 | 249 | 296 | 300 | 198 | 204 | 220 | 236 |
| 08rbl.542 | 137 | 137 | 76 | 76 | 144 | 144 | 226 | 232 | 253 | 253 | 306 | 308 | 202 | 204 | 230 | 240 |
| 08rbl.553 | 135 | 137 | 76 | 76 | 144 | 156 | 224 | 262 | 245 | 249 | 296 | 334 | 202 | 204 | 240 | 240 |
| 08rbl.554 | 135 | 137 | 76 | 76 | 144 | 156 | 226 | 240 | 237 | 239 | 300 | 302 | 202 | 204 | 226 | 238 |
| 08rbl.565 | 135 | 137 | 76 | 76 | 156 | 184 | 226 | 242 | 239 | 245 | 304 | 308 | 200 | 202 | 220 | 232 |
| 08rbl.569 | 137 | 137 | 76 | 76 | 144 | 144 | 248 | 248 | 241 | 249 | 294 | 298 | 200 | 200 | 238 | 240 |
| 08rbl.573 | 137 | 137 | 76 | 76 | 144 | 144 | 222 | 224 | 239 | 245 | 296 | 302 | 208 | 208 | 214 | 236 |
| 08rbl.574 | 137 | 137 | 76 | 76 | 144 | 144 | 232 | 240 | 239 | 251 | 300 | 300 | 196 | 196 | 218 | 238 |
| 08rbl.608 | 137 | 137 | 76 | 76 | 144 | 144 | 224 | 240 | 243 | 245 | 304 | 318 | 160 | 198 | 228 | 232 |
| 08rbl.613 | 137 | 137 | 76 | 76 | 144 | 144 | 224 | 230 | 237 | 245 | 298 | 300 | 160 | 206 | 218 | 236 |
| 08rbl.614 | 137 | 137 | 76 | 76 | 144 | 166 | 224 | 226 | 237 | 237 | 296 | 298 | 200 | 202 | 220 | 222 |
| 08rbl.619 | 135 | 137 | 76 | 76 | 144 | 156 | 220 | 244 | 239 | 247 | 292 | 306 | 180 | 200 | 192 | 270 |
| 08rbl.620 | 135 | 137 | 76 | 76 | 144 | 144 | 240 | 240 | 243 | 245 | 292 | 292 | 204 | 204 | 222 | 238 |
| 08rbl.621 | 137 | 137 | 76 | 76 | 144 | 156 | 230 | 234 | 239 | 247 | 294 | 298 | 196 | 208 | 220 | 236 |
| 08rbl.624 | 137 | 137 | 76 | 76 | 144 | 152 | 232 | 232 | 245 | 247 | 294 | 298 | 196 | 204 | 226 | 232 |
| 08rbl.625 | 137 | 137 | 76 | 76 | 144 | 144 | 230 | 248 | 239 | 245 | 274 | 292 | 200 | 202 | 214 | 232 |
| 08rbl.628 | 135 | 137 | 76 | 76 | 156 | 158 | 222 | 230 | 241 | 245 | 292 | 296 | 196 | 200 | 236 | 240 |
| 08rbl.629 | 137 | 137 | 76 | 76 | 144 | 144 | 230 | 260 | 239 | 245 | 292 | 298 | 196 | 200 | 192 | 218 |

|           |     |     |    |    |     |     |     |     |     |     |     |     |     |     |     |     |
|-----------|-----|-----|----|----|-----|-----|-----|-----|-----|-----|-----|-----|-----|-----|-----|-----|
| 09rbl.001 | 137 | 137 | 76 | 76 | 144 | 156 | 220 | 224 | 243 | 245 | 298 | 300 | 196 | 200 | 222 | 238 |
| 09rbl.004 | 137 | 137 | 76 | 76 | 144 | 144 | 220 | 226 | 243 | 251 | 298 | 298 | 200 | 204 | 236 | 236 |
| 09rbl.005 | 137 | 137 | 72 | 76 | 144 | 144 | 212 | 230 | 247 | 251 | 284 | 298 | 196 | 200 | 192 | 244 |
| 09rbl.007 | 135 | 137 | 76 | 76 | 144 | 162 | 228 | 248 | 245 | 245 | 298 | 302 | 200 | 202 | 218 | 258 |
| 09rbl.009 | 135 | 137 | 76 | 78 | 156 | 156 | 224 | 236 | 249 | 253 | 296 | 304 | 198 | 200 | 238 | 238 |
| 09rbl.013 | 137 | 137 | 76 | 76 | 144 | 156 | 228 | 228 | 245 | 245 | 298 | 300 | 202 | 204 | 234 | 234 |
| 09rbl.014 | 135 | 137 | 76 | 76 | 144 | 144 | 240 | 260 | 241 | 251 | 292 | 294 | 196 | 202 | 218 | 234 |
| 09rbl.018 | 137 | 137 | 76 | 76 | 144 | 158 | 214 | 228 | 249 | 251 | 296 | 300 | 200 | 202 | 192 | 220 |
| 09rbl.026 | 137 | 137 | 74 | 78 | 144 | 172 | 214 | 230 | 251 | 255 | 296 | 298 | 202 | 202 | 240 | 260 |
| 09rbl.030 | 135 | 137 | 76 | 76 | 144 | 144 | 222 | 232 | 249 | 249 | 294 | 298 | 200 | 206 | 220 | 238 |
| 09rbl.031 | 137 | 137 | 76 | 78 | 144 | 156 | 230 | 240 | 245 | 249 | 292 | 298 | 206 | 208 | 220 | 252 |
| 09rbl.032 | 137 | 137 | 76 | 76 | 156 | 180 | 230 | 238 | 247 | 249 | 294 | 300 | 196 | 200 | 220 | 252 |
| 09rbl.033 | 137 | 137 | 76 | 76 | 144 | 188 | 222 | 238 | 251 | 253 | 296 | 302 | 198 | 202 | 192 | 234 |
| 09rbl.036 | 137 | 137 | 76 | 76 | 144 | 156 | 222 | 230 | 249 | 249 | 292 | 296 | 160 | 196 | 216 | 234 |
| 09rbl.040 | 135 | 137 | 76 | 76 | 144 | 156 | 234 | 244 | 249 | 251 | 302 | 302 | 196 | 200 | 234 | 240 |
| 09rbl.043 | 137 | 137 | 76 | 76 | 160 | 162 | 222 | 240 | 249 | 249 | 302 | 306 | 202 | 206 | 192 | 226 |
| 09rbl.045 | 137 | 137 | 76 | 76 | 156 | 164 | 230 | 240 | 249 | 253 | 292 | 296 | 196 | 200 | 234 | 234 |
| 09rbl.047 | 137 | 137 | 76 | 76 | 144 | 160 | 236 | 238 | 249 | 253 | 298 | 298 | 198 | 208 | 220 | 238 |
| 09rbl.048 | 137 | 137 | 76 | 76 | 144 | 144 | 224 | 238 | 249 | 251 | 302 | 306 | 206 | 208 | 226 | 238 |
| 09rbl.082 | 135 | 137 | 76 | 76 | 144 | 144 | 226 | 242 | 243 | 243 | 302 | 308 | 200 | 202 | 222 | 234 |
| 09rbl.086 | 135 | 137 | 76 | 76 | 144 | 144 | 224 | 234 | 241 | 243 | 294 | 296 | 200 | 206 | 212 | 226 |
| 09rbl.092 | 137 | 137 | 76 | 76 | 156 | 158 | 224 | 238 | 243 | 243 | 300 | 308 | 200 | 202 | 228 | 238 |
| 09rbl.105 | 135 | 135 | 76 | 76 | 144 | 156 | 234 | 240 | 249 | 251 | 296 | 298 | 198 | 206 | 222 | 240 |
| 09rbl.109 | 137 | 137 | 76 | 76 | 144 | 152 | 222 | 236 | 243 | 255 | 298 | 306 | 202 | 214 | 238 | 238 |
| 09rbl.111 | 137 | 137 | 76 | 78 | 144 | 158 | 224 | 230 | 249 | 249 | 292 | 302 | 200 | 204 | 246 | 250 |
| 09rbl.112 | 137 | 137 | 76 | 76 | 156 | 158 | 240 | 242 | 251 | 255 | 292 | 306 | 198 | 202 | 236 | 236 |
| 09rbl.113 | 137 | 137 | 76 | 76 | 144 | 156 | 224 | 230 | 249 | 249 | 294 | 298 | 198 | 198 | 222 | 238 |
| 09rbl.117 | 137 | 137 | 76 | 78 | 144 | 144 | 224 | 240 | 249 | 253 | 290 | 292 | 200 | 212 | 218 | 232 |
| 09rbl.118 | 137 | 137 | 76 | 76 | 144 | 174 | 228 | 230 | 249 | 255 | 300 | 306 | 198 | 198 | 236 | 238 |
| 09rbl.121 | 137 | 137 | 76 | 76 | 144 | 156 | 222 | 230 | 245 | 255 | 298 | 306 | 200 | 202 | 240 | 252 |
| 09rbl.123 | 137 | 137 | 76 | 76 | 144 | 144 | 236 | 238 | 251 | 255 | 294 | 320 | 210 | 214 | 218 | 252 |
| 09rbl.125 | 137 | 137 | 76 | 76 | 144 | 144 | 228 | 234 | 241 | 251 | 298 | 302 | 180 | 196 | 250 | 270 |
| 09rbl.133 | 135 | 137 | 76 | 76 | 156 | 160 | 214 | 248 | 239 | 251 | 296 | 296 | 202 | 204 | 222 | 238 |
| 09rbl.134 | 135 | 137 | 76 | 76 | 144 | 176 | 222 | 232 | 243 | 243 | 300 | 308 | 200 | 200 | 218 | 220 |
| 09rbl.137 | 137 | 137 | 76 | 76 | 154 | 158 | 226 | 248 | 249 | 249 | 294 | 300 | 198 | 206 | 236 | 242 |
| 09rbl.139 | 137 | 137 | 76 | 76 | 144 | 158 | 224 | 228 | 241 | 249 | 300 | 304 | 200 | 202 | 218 | 238 |
| 09rbl.153 | 135 | 137 | 76 | 76 | 144 | 176 | 228 | 242 | 249 | 253 | 300 | 300 | 198 | 202 | 220 | 238 |

|           |     |     |    |    |     |     |     |     |     |     |     |     |     |     |     |     |
|-----------|-----|-----|----|----|-----|-----|-----|-----|-----|-----|-----|-----|-----|-----|-----|-----|
| 09rbl.157 | 137 | 137 | 76 | 76 | 144 | 156 | 222 | 222 | 251 | 253 | 300 | 302 | 202 | 204 | 222 | 228 |
| 09rbl.159 | 137 | 137 | 76 | 78 | 156 | 164 | 222 | 230 | 249 | 251 | 300 | 302 | 200 | 200 | 216 | 240 |
| 09rbl.167 | 137 | 137 | 76 | 76 | 144 | 144 | 224 | 240 | 251 | 253 | 300 | 300 | 198 | 200 | 238 | 250 |
| 09rbl.168 | 137 | 137 | 76 | 76 | 144 | 156 | 232 | 232 | 251 | 251 | 296 | 296 | 202 | 204 | 238 | 240 |
| 09rbl.170 | 137 | 137 | 76 | 78 | 144 | 162 | 222 | 230 | 243 | 253 | 296 | 300 | 200 | 202 | 222 | 222 |
| 09rbl.171 | 137 | 137 | 76 | 76 | 156 | 168 | 224 | 230 | 249 | 249 | 298 | 298 | 200 | 212 | 238 | 240 |
| 09rbl.173 | 135 | 137 | 76 | 76 | 144 | 144 | 224 | 238 | 243 | 255 | 302 | 310 | 198 | 202 | 218 | 220 |
| 09rbl.186 | 137 | 137 | 76 | 78 | 144 | 144 | 224 | 234 | 239 | 241 | 296 | 308 | 200 | 202 | 224 | 230 |
| 09rbl.190 | 137 | 137 | 76 | 78 | 156 | 176 | 224 | 240 | 243 | 251 | 296 | 302 | 200 | 208 | 236 | 254 |
| 09rbl.203 | 135 | 137 | 76 | 76 | 156 | 158 | 232 | 240 | 253 | 253 | 294 | 294 | 200 | 202 | 214 | 246 |
| 09rbl.207 | 135 | 137 | 76 | 76 | 144 | 144 | 224 | 236 | 251 | 251 | 306 | 310 | 200 | 200 | 240 | 250 |
| 09rbl.209 | 135 | 137 | 74 | 76 | 144 | 162 | 230 | 238 | 249 | 251 | 294 | 296 | 200 | 202 | 222 | 222 |
| 09rbl.211 | 135 | 137 | 76 | 78 | 144 | 164 | 228 | 230 | 243 | 251 | 296 | 300 | 196 | 206 | 224 | 236 |
| 09rbl.214 | 137 | 137 | 76 | 76 | 144 | 158 | 222 | 222 | 241 | 243 | 298 | 310 | 198 | 200 | 236 | 236 |
| 09rbl.219 | 135 | 137 | 76 | 76 | 144 | 156 | 222 | 230 | 249 | 251 | 300 | 334 | 202 | 202 | 222 | 234 |
| 09rbl.222 | 137 | 137 | 76 | 76 | 144 | 156 | 224 | 232 | 251 | 251 | 274 | 294 | 160 | 160 | 240 | 242 |
| 09rbl.228 | 137 | 137 | 76 | 76 | 144 | 158 | 214 | 234 | 241 | 255 | 294 | 296 | 204 | 204 | 228 | 252 |
| 09rbl.232 | 135 | 137 | 76 | 76 | 144 | 188 | 222 | 262 | 241 | 245 | 298 | 298 | 200 | 200 | 220 | 220 |
| 09rbl.233 | 137 | 137 | 76 | 76 | 156 | 156 | 226 | 240 | 243 | 243 | 302 | 304 | 196 | 202 | 218 | 256 |
| 09rbl.234 | 137 | 137 | 76 | 76 | 156 | 164 | 220 | 230 | 251 | 253 | 300 | 306 | 198 | 202 | 220 | 234 |
| 09rbl.235 | 137 | 137 | 76 | 76 | 144 | 156 | 220 | 228 | 245 | 251 | 298 | 298 | 198 | 202 | 232 | 238 |
| 09rbl.244 | 137 | 137 | 76 | 78 | 144 | 144 | 220 | 234 | 251 | 255 | 298 | 324 | 200 | 202 | 234 | 234 |
| 09rbl.245 | 137 | 137 | 76 | 76 | 144 | 158 | 230 | 230 | 243 | 251 | 300 | 310 | 202 | 204 | 216 | 234 |
| 09rbl.248 | 135 | 137 | 76 | 76 | 144 | 156 | 220 | 224 | 249 | 251 | 298 | 302 | 196 | 202 | 234 | 234 |
| 09rbl.253 | 137 | 137 | 76 | 76 | 144 | 156 | 230 | 238 | 243 | 243 | 300 | 302 | 198 | 200 | 232 | 236 |
| 09rbl.254 | 137 | 137 | 76 | 78 | 144 | 156 | 224 | 228 | 243 | 251 | 298 | 300 | 196 | 200 | 222 | 240 |
| 09rbl.256 | 137 | 137 | 76 | 78 | 156 | 156 | 214 | 230 | 243 | 243 | 294 | 300 | 196 | 198 | 220 | 232 |
| 09rbl.266 | 137 | 137 | 76 | 76 | 152 | 158 | 232 | 250 | 251 | 255 | 304 | 304 | 196 | 204 | 192 | 240 |
| 09rbl.269 | 135 | 137 | 76 | 76 | 174 | 180 | 222 | 224 | 247 | 247 | 296 | 298 | 200 | 202 | 220 | 230 |
| 09rbl.270 | 135 | 137 | 76 | 76 | 144 | 156 | 238 | 242 | 245 | 253 | 298 | 298 | 198 | 200 | 220 | 224 |
| 09rbl.276 | 135 | 137 | 76 | 76 | 144 | 156 | 224 | 226 | 239 | 243 | 300 | 308 | 198 | 200 | 234 | 244 |
| 09rbl.284 | 137 | 137 | 76 | 76 | 156 | 184 | 224 | 232 | 249 | 251 | 300 | 302 | 204 | 206 | 192 | 244 |
| 09rbl.289 | 135 | 137 | 76 | 76 | 144 | 188 | 226 | 238 | 243 | 251 | 300 | 302 | 198 | 200 | 230 | 252 |
| 09rbl.295 | 135 | 137 | 76 | 76 | 144 | 152 | 226 | 234 | 237 | 249 | 302 | 302 | 198 | 200 | 228 | 234 |
| 09rbl.297 | 137 | 137 | 76 | 76 | 144 | 152 | 228 | 232 | 253 | 253 | 296 | 302 | 200 | 204 | 218 | 236 |
| 09rbl.299 | 137 | 137 | 76 | 78 | 154 | 164 | 232 | 236 | 247 | 249 | 296 | 296 | 160 | 206 | 192 | 228 |
| 09rbl.309 | 137 | 137 | 76 | 76 | 156 | 180 | 226 | 234 | 245 | 245 | 296 | 296 | 202 | 202 | 238 | 242 |

|           |     |     |    |    |     |     |     |     |     |     |     |     |     |     |     |     |
|-----------|-----|-----|----|----|-----|-----|-----|-----|-----|-----|-----|-----|-----|-----|-----|-----|
| 09rbl.314 | 135 | 137 | 76 | 78 | 144 | 144 | 234 | 236 | 243 | 243 | 300 | 300 | 200 | 200 | 212 | 218 |
| 09rbl.316 | 137 | 137 | 76 | 76 | 144 | 144 | 232 | 232 | 249 | 249 | 296 | 298 | 196 | 196 | 230 | 234 |
| 09rbl.319 | 135 | 137 | 76 | 76 | 160 | 188 | 224 | 228 | 243 | 253 | 296 | 302 | 198 | 200 | 220 | 232 |
| 09rbl.320 | 137 | 137 | 76 | 76 | 156 | 156 | 224 | 224 | 245 | 251 | 294 | 294 | 200 | 202 | 234 | 238 |
| 09rbl.321 | 135 | 135 | 74 | 76 | 144 | 180 | 228 | 252 | 245 | 249 | 300 | 300 | 198 | 198 | 220 | 238 |
| 09rbl.323 | 137 | 137 | 76 | 78 | 158 | 158 | 228 | 234 | 251 | 253 | 298 | 302 | 200 | 202 | 232 | 238 |
| 09rbl.327 | 137 | 137 | 76 | 76 | 144 | 156 | 226 | 232 | 251 | 255 | 292 | 298 | 200 | 200 | 218 | 220 |
| 09rbl.331 | 137 | 137 | 76 | 76 | 144 | 158 | 230 | 250 | 249 | 255 | 292 | 310 | 194 | 200 | 212 | 212 |
| 09rbl.333 | 137 | 137 | 76 | 76 | 144 | 154 | 224 | 224 | 251 | 251 | 298 | 304 | 200 | 202 | 224 | 250 |
| 09rbl.350 | 137 | 137 | 76 | 76 | 144 | 162 | 222 | 232 | 243 | 255 | 296 | 302 | 202 | 204 | 220 | 248 |
| 09rbl.364 | 135 | 137 | 72 | 76 | 156 | 158 | 222 | 224 | 241 | 253 | 298 | 302 | 196 | 196 | 218 | 252 |
| 09rbl.371 | 137 | 137 | 76 | 76 | 156 | 156 | 222 | 234 | 249 | 249 | 296 | 308 | 198 | 204 | 220 | 234 |
| 09rbl.372 | 137 | 137 | 76 | 76 | 144 | 156 | 230 | 238 | 249 | 255 | 294 | 306 | 204 | 208 | 230 | 238 |
| 09rbl.380 | 137 | 137 | 76 | 76 | 144 | 180 | 224 | 224 | 249 | 255 | 298 | 302 | 202 | 204 | 238 | 250 |
| 09rbl.385 | 135 | 135 | 76 | 76 | 144 | 158 | 230 | 236 | 253 | 253 | 296 | 302 | 198 | 200 | 234 | 238 |
| 09rbl.391 | 137 | 137 | 76 | 78 | 144 | 144 | 222 | 240 | 241 | 247 | 292 | 296 | 0   | 0   | 240 | 250 |
| 09rbl.394 | 135 | 135 | 76 | 78 | 144 | 144 | 226 | 228 | 239 | 243 | 296 | 298 | 202 | 204 | 220 | 220 |
| 09rbl.401 | 137 | 137 | 76 | 76 | 144 | 156 | 222 | 230 | 253 | 253 | 298 | 302 | 200 | 206 | 236 | 236 |
| 09rbl.406 | 137 | 137 | 76 | 76 | 144 | 152 | 230 | 240 | 251 | 255 | 294 | 302 | 200 | 200 | 192 | 236 |
| 09rbl.413 | 137 | 137 | 76 | 76 | 144 | 156 | 234 | 254 | 249 | 251 | 302 | 302 | 192 | 196 | 220 | 254 |
| 09rbl.415 | 137 | 137 | 76 | 76 | 144 | 152 | 214 | 230 | 243 | 255 | 300 | 304 | 204 | 206 | 192 | 238 |
| 09rbl.418 | 137 | 137 | 76 | 76 | 144 | 144 | 228 | 250 | 243 | 249 | 298 | 298 | 198 | 208 | 222 | 238 |
| 09rbl.420 | 137 | 137 | 76 | 76 | 144 | 156 | 228 | 230 | 249 | 251 | 296 | 300 | 200 | 202 | 234 | 236 |
| 09rbl.425 | 135 | 137 | 76 | 76 | 152 | 188 | 224 | 224 | 253 | 255 | 296 | 302 | 200 | 202 | 238 | 240 |
| 09rbl.434 | 137 | 137 | 76 | 76 | 160 | 180 | 220 | 234 | 249 | 251 | 298 | 302 | 198 | 206 | 214 | 214 |
| 09rbl.435 | 135 | 137 | 76 | 78 | 144 | 172 | 230 | 248 | 251 | 251 | 298 | 302 | 204 | 204 | 220 | 232 |
| 09rbl.440 | 137 | 137 | 76 | 76 | 144 | 144 | 230 | 236 | 249 | 251 | 298 | 304 | 198 | 204 | 222 | 222 |
| 09rbl.442 | 135 | 137 | 76 | 76 | 144 | 158 | 222 | 230 | 243 | 251 | 298 | 302 | 202 | 204 | 230 | 230 |
| 09rbl.447 | 135 | 135 | 76 | 76 | 144 | 160 | 230 | 238 | 251 | 255 | 296 | 312 | 196 | 196 | 218 | 222 |
| 09rbl.453 | 137 | 137 | 76 | 76 | 156 | 176 | 220 | 224 | 249 | 253 | 300 | 306 | 200 | 204 | 192 | 194 |
| 09rbl.455 | 137 | 137 | 76 | 76 | 144 | 156 | 230 | 238 | 245 | 253 | 302 | 304 | 202 | 206 | 234 | 240 |
| 09rbl.460 | 137 | 137 | 76 | 76 | 164 | 176 | 236 | 238 | 243 | 251 | 298 | 298 | 202 | 204 | 214 | 216 |
| 09rbl.462 | 135 | 137 | 76 | 76 | 144 | 144 | 220 | 260 | 251 | 251 | 302 | 302 | 202 | 202 | 220 | 236 |
| 09rbl.463 | 137 | 137 | 74 | 76 | 144 | 164 | 230 | 238 | 245 | 251 | 300 | 308 | 200 | 202 | 236 | 240 |
| 09rbl.466 | 135 | 135 | 76 | 76 | 144 | 146 | 224 | 240 | 243 | 253 | 296 | 296 | 204 | 206 | 240 | 250 |
| 09rbl.468 | 137 | 137 | 76 | 76 | 158 | 158 | 230 | 238 | 243 | 251 | 296 | 298 | 202 | 204 | 228 | 236 |
| 09rbl.476 | 135 | 137 | 76 | 76 | 144 | 144 | 230 | 248 | 247 | 253 | 296 | 306 | 198 | 206 | 212 | 232 |

|           |     |     |    |    |     |     |     |     |     |     |     |     |     |     |     |     |
|-----------|-----|-----|----|----|-----|-----|-----|-----|-----|-----|-----|-----|-----|-----|-----|-----|
| 09rbl.490 | 137 | 137 | 76 | 76 | 144 | 158 | 222 | 242 | 255 | 255 | 300 | 302 | 200 | 202 | 240 | 240 |
| 09rbl.494 | 137 | 137 | 76 | 76 | 156 | 158 | 212 | 220 | 243 | 253 | 302 | 302 | 200 | 200 | 242 | 256 |
| 09rbl.501 | 135 | 137 | 76 | 76 | 144 | 174 | 222 | 246 | 249 | 253 | 292 | 304 | 200 | 206 | 212 | 222 |
| 09rbl.503 | 137 | 137 | 76 | 76 | 150 | 180 | 230 | 238 | 243 | 249 | 302 | 304 | 202 | 206 | 228 | 236 |
| 09rbl.510 | 135 | 137 | 76 | 76 | 144 | 146 | 222 | 228 | 243 | 255 | 294 | 300 | 202 | 202 | 222 | 228 |
| 09rbl.511 | 135 | 137 | 76 | 76 | 144 | 158 | 222 | 224 | 243 | 251 | 294 | 306 | 200 | 202 | 234 | 238 |
| 09rbl.514 | 135 | 137 | 76 | 76 | 144 | 144 | 224 | 246 | 243 | 243 | 298 | 306 | 200 | 204 | 240 | 244 |
| 09rbl.516 | 135 | 137 | 76 | 76 | 154 | 158 | 228 | 230 | 249 | 251 | 294 | 310 | 200 | 206 | 224 | 240 |
| 09rbl.518 | 135 | 137 | 76 | 76 | 144 | 158 | 222 | 238 | 241 | 253 | 300 | 308 | 202 | 206 | 216 | 228 |
| 10rbl.001 | 137 | 137 | 76 | 76 | 156 | 160 | 230 | 242 | 249 | 255 | 296 | 296 | 196 | 206 | 222 | 226 |
| 10rbl.004 | 137 | 137 | 76 | 78 | 152 | 152 | 214 | 238 | 245 | 255 | 290 | 302 | 202 | 204 | 212 | 240 |
| 10rbl.006 | 137 | 137 | 76 | 78 | 144 | 144 | 214 | 236 | 253 | 255 | 300 | 300 | 198 | 210 | 236 | 240 |
| 10rbl.007 | 137 | 137 | 76 | 78 | 144 | 162 | 214 | 222 | 251 | 255 | 296 | 300 | 198 | 204 | 238 | 240 |
| 10rbl.008 | 137 | 137 | 76 | 78 | 144 | 144 | 214 | 214 | 249 | 255 | 296 | 302 | 198 | 200 | 220 | 238 |
| 10rbl.016 | 137 | 137 | 76 | 78 | 144 | 144 | 230 | 238 | 249 | 255 | 292 | 298 | 202 | 204 | 212 | 220 |
| 10rbl.017 | 137 | 137 | 76 | 78 | 162 | 162 | 214 | 222 | 251 | 253 | 296 | 308 | 202 | 202 | 192 | 238 |
| 10rbl.018 | 137 | 137 | 76 | 78 | 144 | 144 | 224 | 230 | 253 | 253 | 298 | 300 | 198 | 198 | 220 | 236 |
| 10rbl.019 | 137 | 137 | 76 | 76 | 156 | 156 | 230 | 236 | 243 | 253 | 296 | 300 | 196 | 202 | 224 | 232 |
| 10rbl.021 | 137 | 137 | 76 | 76 | 156 | 162 | 222 | 230 | 255 | 259 | 296 | 296 | 196 | 202 | 224 | 234 |
| 10rbl.028 | 137 | 137 | 72 | 78 | 144 | 156 | 232 | 240 | 251 | 251 | 298 | 304 | 202 | 202 | 230 | 234 |
| 10rbl.031 | 137 | 137 | 76 | 76 | 160 | 180 | 228 | 230 | 245 | 249 | 286 | 290 | 196 | 202 | 212 | 244 |
| 10rbl.035 | 137 | 137 | 72 | 76 | 168 | 188 | 246 | 246 | 249 | 249 | 294 | 310 | 198 | 202 | 218 | 234 |
| 10rbl.038 | 137 | 137 | 76 | 76 | 160 | 160 | 230 | 232 | 239 | 251 | 296 | 302 | 200 | 200 | 222 | 232 |
| 10rbl.049 | 137 | 137 | 72 | 76 | 156 | 168 | 224 | 230 | 241 | 253 | 300 | 300 | 202 | 206 | 236 | 244 |
| 10rbl.056 | 137 | 137 | 76 | 78 | 152 | 164 | 222 | 238 | 255 | 255 | 300 | 304 | 196 | 200 | 220 | 240 |
| 10rbl.058 | 135 | 137 | 76 | 76 | 144 | 156 | 222 | 222 | 245 | 249 | 304 | 304 | 200 | 200 | 214 | 238 |
| 10rbl.060 | 137 | 137 | 76 | 76 | 144 | 144 | 224 | 242 | 249 | 253 | 302 | 302 | 202 | 210 | 220 | 238 |
| 10rbl.064 | 137 | 137 | 76 | 76 | 144 | 144 | 230 | 236 | 243 | 243 | 298 | 302 | 200 | 204 | 212 | 240 |
| 10rbl.065 | 137 | 137 | 76 | 76 | 144 | 158 | 224 | 230 | 249 | 249 | 294 | 296 | 196 | 198 | 220 | 238 |
| 10rbl.066 | 137 | 137 | 76 | 76 | 144 | 144 | 224 | 234 | 241 | 249 | 294 | 302 | 196 | 204 | 220 | 236 |
| 10rbl.067 | 137 | 137 | 76 | 76 | 144 | 156 | 222 | 230 | 251 | 251 | 296 | 304 | 196 | 196 | 234 | 250 |
| 10rbl.081 | 137 | 137 | 76 | 76 | 156 | 160 | 222 | 242 | 249 | 249 | 296 | 306 | 196 | 202 | 230 | 236 |
| 10rbl.082 | 137 | 137 | 76 | 76 | 144 | 194 | 214 | 224 | 243 | 249 | 296 | 296 | 198 | 200 | 212 | 212 |
| 10rbl.083 | 137 | 137 | 76 | 76 | 158 | 182 | 222 | 238 | 241 | 251 | 302 | 316 | 160 | 196 | 226 | 236 |
| 10rbl.084 | 137 | 137 | 76 | 76 | 144 | 156 | 224 | 238 | 245 | 249 | 300 | 300 | 198 | 200 | 238 | 242 |
| 10rbl.088 | 137 | 137 | 76 | 76 | 144 | 158 | 224 | 224 | 251 | 259 | 296 | 302 | 160 | 202 | 214 | 238 |
| 10rbl.091 | 137 | 137 | 76 | 76 | 152 | 156 | 224 | 230 | 251 | 255 | 296 | 300 | 202 | 202 | 232 | 240 |

|           |     |     |    |    |     |     |     |     |     |     |     |     |     |     |     |     |
|-----------|-----|-----|----|----|-----|-----|-----|-----|-----|-----|-----|-----|-----|-----|-----|-----|
| 10rbl.095 | 137 | 137 | 76 | 76 | 144 | 144 | 220 | 222 | 251 | 251 | 298 | 298 | 202 | 202 | 236 | 238 |
| 10rbl.099 | 137 | 137 | 76 | 76 | 144 | 144 | 220 | 222 | 249 | 253 | 300 | 300 | 196 | 200 | 238 | 248 |
| 10rbl.112 | 137 | 137 | 76 | 76 | 164 | 164 | 220 | 230 | 245 | 249 | 302 | 302 | 198 | 200 | 194 | 236 |
| 10rbl.115 | 135 | 137 | 76 | 76 | 156 | 156 | 222 | 234 | 239 | 249 | 300 | 300 | 196 | 202 | 220 | 240 |
| 10rbl.117 | 137 | 137 | 76 | 78 | 144 | 144 | 230 | 256 | 249 | 253 | 296 | 302 | 200 | 202 | 212 | 236 |
| 10rbl.122 | 137 | 137 | 76 | 76 | 156 | 156 | 224 | 238 | 249 | 253 | 302 | 302 | 200 | 206 | 236 | 240 |
| 10rbl.131 | 137 | 137 | 76 | 76 | 144 | 152 | 220 | 222 | 243 | 255 | 298 | 302 | 160 | 202 | 234 | 234 |
| 10rbl.133 | 137 | 137 | 76 | 78 | 144 | 156 | 222 | 230 | 243 | 253 | 296 | 296 | 200 | 202 | 234 | 240 |
| 10rbl.139 | 137 | 137 | 76 | 76 | 156 | 184 | 224 | 224 | 243 | 251 | 298 | 302 | 200 | 202 | 222 | 236 |
| 10rbl.141 | 137 | 137 | 76 | 76 | 138 | 144 | 230 | 238 | 245 | 249 | 300 | 300 | 202 | 202 | 228 | 234 |
| 10rbl.144 | 137 | 137 | 72 | 76 | 156 | 156 | 238 | 240 | 249 | 253 | 296 | 302 | 200 | 200 | 212 | 234 |
| 10rbl.150 | 135 | 137 | 76 | 78 | 144 | 156 | 222 | 238 | 251 | 251 | 296 | 304 | 196 | 196 | 238 | 252 |
| 10rbl.151 | 135 | 137 | 76 | 76 | 144 | 144 | 220 | 224 | 239 | 249 | 294 | 300 | 200 | 200 | 192 | 234 |
| 10rbl.155 | 135 | 137 | 76 | 76 | 156 | 156 | 222 | 232 | 247 | 247 | 294 | 296 | 202 | 204 | 234 | 270 |
| 10rbl.156 | 137 | 137 | 76 | 76 | 144 | 162 | 230 | 250 | 249 | 249 | 292 | 310 | 200 | 202 | 222 | 226 |
| 10rbl.159 | 137 | 137 | 76 | 76 | 144 | 152 | 222 | 224 | 243 | 249 | 296 | 296 | 202 | 202 | 240 | 240 |
| 10rbl.161 | 137 | 137 | 76 | 76 | 144 | 176 | 224 | 224 | 243 | 253 | 300 | 300 | 180 | 200 | 218 | 250 |
| 10rbl.162 | 137 | 137 | 76 | 76 | 144 | 144 | 230 | 240 | 247 | 247 | 292 | 298 | 160 | 198 | 232 | 252 |
| 10rbl.166 | 137 | 137 | 76 | 78 | 144 | 170 | 220 | 230 | 249 | 251 | 296 | 296 | 200 | 202 | 226 | 226 |
| 10rbl.168 | 135 | 137 | 76 | 76 | 156 | 156 | 228 | 228 | 239 | 253 | 298 | 302 | 200 | 202 | 224 | 240 |
| 10rbl.171 | 137 | 137 | 76 | 76 | 144 | 158 | 230 | 236 | 243 | 249 | 298 | 310 | 202 | 202 | 224 | 234 |
| 10rbl.172 | 135 | 137 | 76 | 76 | 144 | 156 | 240 | 264 | 251 | 259 | 298 | 304 | 160 | 196 | 238 | 242 |
| 10rbl.179 | 135 | 135 | 76 | 76 | 144 | 144 | 222 | 238 | 249 | 249 | 302 | 302 | 202 | 210 | 218 | 252 |
| 10rbl.182 | 137 | 137 | 76 | 76 | 156 | 194 | 214 | 226 | 243 | 255 | 298 | 298 | 206 | 210 | 230 | 248 |
| 10rbl.192 | 137 | 137 | 76 | 76 | 144 | 156 | 212 | 230 | 251 | 253 | 286 | 300 | 200 | 206 | 250 | 250 |
| 10rbl.200 | 137 | 137 | 76 | 78 | 144 | 152 | 222 | 238 | 243 | 249 | 300 | 300 | 196 | 200 | 216 | 220 |
| 10rbl.203 | 135 | 135 | 76 | 78 | 144 | 144 | 234 | 238 | 253 | 253 | 298 | 298 | 200 | 202 | 232 | 244 |
| 10rbl.208 | 137 | 137 | 76 | 76 | 144 | 164 | 224 | 230 | 241 | 249 | 300 | 300 | 200 | 210 | 220 | 230 |
| 10rbl.214 | 137 | 137 | 76 | 78 | 144 | 156 | 222 | 230 | 253 | 253 | 300 | 320 | 196 | 204 | 226 | 250 |
| 10rbl.215 | 137 | 137 | 76 | 76 | 150 | 188 | 228 | 238 | 249 | 253 | 296 | 302 | 194 | 206 | 222 | 264 |
| 10rbl.216 | 137 | 137 | 76 | 76 | 144 | 144 | 222 | 230 | 249 | 249 | 298 | 302 | 200 | 204 | 212 | 220 |
| 10rbl.220 | 135 | 137 | 76 | 76 | 156 | 162 | 222 | 224 | 243 | 249 | 296 | 298 | 196 | 198 | 228 | 238 |
| 10rbl.221 | 137 | 137 | 76 | 76 | 144 | 144 | 236 | 236 | 249 | 249 | 294 | 294 | 196 | 210 | 222 | 238 |
| 10rbl.224 | 137 | 137 | 76 | 76 | 144 | 158 | 222 | 222 | 243 | 249 | 304 | 308 | 198 | 202 | 192 | 220 |
| 10rbl.225 | 137 | 137 | 76 | 76 | 152 | 156 | 224 | 224 | 253 | 253 | 298 | 308 | 196 | 200 | 218 | 238 |
| 10rbl.227 | 137 | 137 | 76 | 76 | 144 | 144 | 242 | 260 | 243 | 255 | 292 | 300 | 200 | 202 | 234 | 234 |
| 10rbl.232 | 137 | 137 | 76 | 76 | 144 | 156 | 230 | 238 | 243 | 243 | 300 | 302 | 202 | 204 | 234 | 238 |

|           |     |     |    |    |     |     |     |     |     |     |     |     |     |     |     |     |
|-----------|-----|-----|----|----|-----|-----|-----|-----|-----|-----|-----|-----|-----|-----|-----|-----|
| 10rbl.233 | 135 | 137 | 72 | 76 | 156 | 158 | 224 | 226 | 243 | 243 | 300 | 302 | 196 | 200 | 236 | 238 |
| 10rbl.238 | 135 | 137 | 74 | 76 | 144 | 158 | 226 | 230 | 243 | 249 | 296 | 298 | 200 | 200 | 238 | 248 |
| 10rbl.240 | 135 | 137 | 76 | 76 | 144 | 146 | 214 | 224 | 239 | 249 | 292 | 302 | 196 | 200 | 222 | 238 |
| 10rbl.241 | 135 | 137 | 76 | 76 | 144 | 162 | 230 | 238 | 249 | 249 | 300 | 310 | 180 | 200 | 234 | 234 |
| 10rbl.242 | 135 | 137 | 76 | 76 | 146 | 180 | 226 | 230 | 247 | 247 | 298 | 302 | 200 | 202 | 220 | 248 |
| 10rbl.244 | 135 | 137 | 76 | 76 | 144 | 180 | 228 | 230 | 249 | 249 | 298 | 300 | 198 | 202 | 220 | 234 |
| 10rbl.246 | 137 | 137 | 76 | 76 | 144 | 176 | 236 | 240 | 241 | 255 | 294 | 318 | 196 | 196 | 218 | 222 |
| 10rbl.253 | 137 | 137 | 76 | 78 | 144 | 188 | 232 | 240 | 245 | 249 | 292 | 294 | 198 | 204 | 238 | 240 |
| 10rbl.257 | 135 | 137 | 76 | 76 | 158 | 162 | 222 | 222 | 253 | 255 | 296 | 296 | 198 | 198 | 222 | 224 |
| 10rbl.258 | 137 | 137 | 76 | 76 | 144 | 156 | 224 | 230 | 243 | 253 | 298 | 298 | 204 | 206 | 232 | 236 |
| 10rbl.265 | 135 | 135 | 76 | 76 | 144 | 156 | 230 | 230 | 249 | 249 | 298 | 298 | 196 | 202 | 238 | 242 |
| 10rbl.267 | 137 | 137 | 76 | 76 | 144 | 144 | 224 | 230 | 243 | 243 | 296 | 302 | 202 | 202 | 232 | 238 |
| 10rbl.276 | 135 | 137 | 76 | 76 | 158 | 158 | 222 | 224 | 239 | 245 | 294 | 294 | 200 | 200 | 226 | 226 |
| 10rbl.278 | 135 | 137 | 76 | 76 | 156 | 162 | 230 | 230 | 243 | 251 | 300 | 302 | 200 | 202 | 220 | 242 |
| 10rbl.282 | 137 | 137 | 76 | 76 | 144 | 158 | 230 | 230 | 245 | 251 | 294 | 294 | 202 | 202 | 224 | 244 |
| 10rbl.283 | 137 | 137 | 76 | 76 | 144 | 144 | 224 | 240 | 251 | 251 | 296 | 302 | 200 | 202 | 218 | 218 |
| 10rbl.284 | 137 | 137 | 76 | 76 | 0   | 0   | 234 | 238 | 245 | 245 | 298 | 298 | 198 | 206 | 220 | 236 |
| 10rbl.288 | 137 | 137 | 76 | 76 | 144 | 144 | 224 | 230 | 251 | 259 | 302 | 302 | 202 | 202 | 220 | 236 |
| 10rbl.297 | 137 | 137 | 76 | 76 | 144 | 144 | 224 | 242 | 239 | 253 | 302 | 328 | 202 | 202 | 220 | 236 |
| 10rbl.311 | 137 | 137 | 76 | 76 | 146 | 188 | 222 | 228 | 239 | 249 | 292 | 292 | 202 | 204 | 234 | 234 |
| 10rbl.316 | 137 | 137 | 74 | 76 | 144 | 144 | 220 | 258 | 243 | 243 | 296 | 306 | 200 | 202 | 192 | 230 |
| 10rbl.321 | 137 | 137 | 76 | 78 | 162 | 188 | 220 | 228 | 249 | 249 | 292 | 300 | 198 | 202 | 234 | 252 |
| 10rbl.324 | 137 | 137 | 76 | 76 | 144 | 144 | 226 | 238 | 239 | 243 | 296 | 296 | 202 | 202 | 218 | 234 |
| 10rbl.325 | 137 | 137 | 72 | 76 | 144 | 156 | 230 | 230 | 245 | 253 | 300 | 300 | 196 | 202 | 198 | 234 |
| 10rbl.326 | 137 | 137 | 76 | 76 | 144 | 156 | 224 | 230 | 251 | 251 | 294 | 302 | 196 | 200 | 216 | 230 |
| 10rbl.327 | 137 | 137 | 76 | 76 | 144 | 144 | 222 | 230 | 251 | 257 | 292 | 300 | 160 | 200 | 220 | 254 |
| 10rbl.330 | 137 | 137 | 76 | 76 | 144 | 144 | 232 | 234 | 251 | 251 | 296 | 304 | 160 | 160 | 216 | 220 |
| 10rbl.339 | 137 | 137 | 76 | 76 | 144 | 156 | 224 | 250 | 251 | 255 | 298 | 302 | 196 | 198 | 234 | 234 |
| 10rbl.340 | 135 | 137 | 76 | 78 | 144 | 156 | 224 | 230 | 243 | 251 | 302 | 302 | 200 | 204 | 222 | 238 |
| 10rbl.348 | 137 | 137 | 76 | 76 | 144 | 156 | 230 | 240 | 243 | 249 | 296 | 296 | 200 | 200 | 240 | 248 |
| 10rbl.350 | 137 | 137 | 76 | 78 | 144 | 144 | 224 | 230 | 249 | 249 | 292 | 298 | 202 | 202 | 218 | 222 |
| 10rbl.352 | 137 | 137 | 76 | 76 | 144 | 152 | 224 | 246 | 251 | 251 | 296 | 304 | 196 | 202 | 194 | 250 |
| 10rbl.358 | 137 | 137 | 76 | 76 | 156 | 168 | 222 | 230 | 241 | 241 | 296 | 296 | 202 | 202 | 192 | 244 |
| 10rbl.360 | 135 | 135 | 76 | 76 | 144 | 144 | 222 | 236 | 249 | 249 | 288 | 302 | 200 | 202 | 232 | 238 |
| 10rbl.361 | 135 | 137 | 76 | 76 | 138 | 138 | 228 | 236 | 251 | 255 | 294 | 302 | 200 | 202 | 220 | 240 |
| 10rbl.363 | 137 | 137 | 76 | 76 | 144 | 158 | 212 | 246 | 241 | 253 | 302 | 302 | 200 | 202 | 236 | 238 |
| 10rbl.365 | 135 | 137 | 76 | 78 | 144 | 184 | 230 | 240 | 251 | 255 | 298 | 298 | 200 | 206 | 218 | 232 |

|           |     |     |    |    |     |     |     |     |     |     |     |     |     |     |     |     |
|-----------|-----|-----|----|----|-----|-----|-----|-----|-----|-----|-----|-----|-----|-----|-----|-----|
| 10rbl.366 | 135 | 137 | 76 | 76 | 144 | 156 | 230 | 234 | 243 | 243 | 296 | 296 | 204 | 206 | 234 | 234 |
| 10rbl.367 | 135 | 137 | 76 | 76 | 144 | 144 | 230 | 238 | 249 | 251 | 302 | 306 | 198 | 206 | 228 | 238 |
| 10rbl.376 | 135 | 135 | 76 | 76 | 144 | 156 | 224 | 230 | 239 | 251 | 292 | 300 | 160 | 206 | 240 | 248 |
| 10rbl.382 | 135 | 137 | 76 | 76 | 156 | 156 | 230 | 242 | 251 | 255 | 302 | 302 | 200 | 204 | 212 | 234 |
| 10rbl.387 | 137 | 137 | 76 | 76 | 144 | 156 | 214 | 224 | 239 | 253 | 296 | 298 | 200 | 202 | 234 | 234 |
| 10rbl.393 | 137 | 137 | 76 | 76 | 158 | 158 | 224 | 246 | 243 | 249 | 292 | 294 | 200 | 200 | 234 | 248 |
| 10rbl.398 | 137 | 137 | 76 | 76 | 158 | 158 | 224 | 230 | 239 | 255 | 296 | 300 | 200 | 200 | 212 | 250 |
| 10rbl.424 | 137 | 137 | 76 | 76 | 144 | 156 | 222 | 230 | 243 | 255 | 294 | 300 | 204 | 206 | 214 | 238 |
| 10rbl.425 | 137 | 137 | 76 | 76 | 144 | 156 | 214 | 224 | 243 | 253 | 292 | 292 | 196 | 202 | 236 | 248 |
| 10rbl.427 | 135 | 137 | 76 | 76 | 144 | 160 | 222 | 226 | 239 | 253 | 298 | 298 | 160 | 202 | 220 | 242 |
| 10rbl.438 | 135 | 137 | 76 | 78 | 144 | 164 | 222 | 238 | 241 | 249 | 296 | 296 | 202 | 202 | 214 | 238 |
| 10rbl.442 | 135 | 135 | 76 | 76 | 144 | 156 | 224 | 232 | 249 | 249 | 292 | 302 | 196 | 196 | 222 | 238 |
| 10rbl.444 | 135 | 135 | 76 | 76 | 156 | 158 | 228 | 238 | 249 | 249 | 296 | 298 | 202 | 202 | 234 | 236 |
| 10rbl.450 | 137 | 137 | 76 | 76 | 144 | 156 | 222 | 230 | 251 | 251 | 302 | 302 | 196 | 202 | 232 | 236 |
| 10rbl.453 | 137 | 137 | 76 | 76 | 144 | 182 | 226 | 240 | 241 | 249 | 296 | 296 | 200 | 204 | 234 | 236 |
| 10rbl.456 | 137 | 137 | 76 | 76 | 152 | 164 | 228 | 250 | 243 | 243 | 298 | 306 | 200 | 202 | 236 | 250 |
| 10rbl.477 | 135 | 137 | 76 | 76 | 158 | 158 | 226 | 240 | 243 | 243 | 298 | 298 | 196 | 200 | 226 | 236 |
| 10rbl.478 | 137 | 137 | 76 | 76 | 144 | 188 | 222 | 236 | 249 | 255 | 294 | 296 | 160 | 202 | 240 | 250 |
| 11rbl.002 | 137 | 137 | 76 | 76 | 144 | 144 | 226 | 226 | 241 | 243 | 294 | 298 | 196 | 204 | 218 | 226 |
| 11rbl.004 | 137 | 137 | 76 | 76 | 156 | 188 | 224 | 224 | 249 | 251 | 0   | 0   | 0   | 0   | 212 | 230 |
| 11rbl.011 | 137 | 137 | 76 | 76 | 144 | 158 | 222 | 264 | 239 | 243 | 294 | 318 | 200 | 202 | 228 | 238 |
| 11rbl.021 | 137 | 137 | 76 | 76 | 144 | 156 | 230 | 240 | 239 | 239 | 296 | 300 | 200 | 202 | 192 | 238 |
| 11rbl.022 | 135 | 137 | 76 | 76 | 144 | 144 | 226 | 252 | 249 | 253 | 294 | 308 | 196 | 202 | 214 | 248 |
| 11rbl.030 | 137 | 137 | 76 | 76 | 156 | 160 | 222 | 228 | 243 | 253 | 296 | 296 | 196 | 196 | 192 | 216 |
| 11rbl.033 | 137 | 137 | 76 | 76 | 144 | 184 | 212 | 224 | 243 | 251 | 296 | 306 | 198 | 200 | 222 | 238 |
| 11rbl.034 | 137 | 137 | 76 | 76 | 156 | 156 | 222 | 230 | 251 | 253 | 296 | 296 | 202 | 202 | 212 | 240 |
| 11rbl.035 | 135 | 137 | 72 | 76 | 144 | 156 | 230 | 246 | 251 | 251 | 300 | 306 | 202 | 202 | 246 | 260 |
| 11rbl.036 | 137 | 137 | 76 | 76 | 144 | 144 | 230 | 236 | 243 | 255 | 294 | 300 | 160 | 180 | 240 | 244 |
| 11rbl.040 | 137 | 137 | 76 | 76 | 144 | 144 | 222 | 242 | 249 | 255 | 298 | 302 | 200 | 202 | 228 | 238 |
| 11rbl.041 | 137 | 137 | 76 | 76 | 156 | 160 | 230 | 230 | 245 | 249 | 296 | 310 | 200 | 200 | 240 | 240 |
| 11rbl.045 | 137 | 137 | 76 | 76 | 144 | 156 | 222 | 230 | 249 | 251 | 298 | 302 | 204 | 204 | 238 | 260 |
| 11rbl.046 | 137 | 137 | 76 | 76 | 156 | 160 | 222 | 230 | 245 | 253 | 296 | 306 | 196 | 204 | 248 | 256 |
| 11rbl.049 | 135 | 137 | 76 | 76 | 152 | 162 | 222 | 222 | 241 | 249 | 296 | 296 | 198 | 202 | 224 | 232 |
| 11rbl.055 | 137 | 137 | 76 | 76 | 144 | 156 | 230 | 230 | 243 | 249 | 292 | 300 | 196 | 210 | 246 | 254 |
| 11rbl.060 | 137 | 137 | 76 | 76 | 152 | 164 | 214 | 224 | 249 | 253 | 302 | 302 | 204 | 206 | 212 | 236 |
| 11rbl.064 | 135 | 137 | 76 | 76 | 144 | 156 | 222 | 236 | 249 | 249 | 294 | 300 | 196 | 204 | 220 | 220 |
| 11rbl.067 | 137 | 137 | 76 | 76 | 144 | 174 | 230 | 238 | 239 | 249 | 298 | 302 | 194 | 202 | 226 | 250 |



|           |     |     |    |    |     |     |     |     |     |     |     |     |     |     |     |     |
|-----------|-----|-----|----|----|-----|-----|-----|-----|-----|-----|-----|-----|-----|-----|-----|-----|
| 11rbl.076 | 137 | 137 | 76 | 76 | 144 | 156 | 220 | 240 | 251 | 259 | 296 | 302 | 200 | 206 | 220 | 250 |
| 11rbl.077 | 137 | 137 | 76 | 78 | 144 | 156 | 224 | 230 | 241 | 243 | 292 | 296 | 196 | 200 | 222 | 240 |
| 11rbl.086 | 137 | 137 | 76 | 76 | 144 | 156 | 224 | 230 | 251 | 255 | 296 | 300 | 200 | 200 | 240 | 240 |
| 11rbl.087 | 137 | 137 | 76 | 76 | 144 | 156 | 222 | 238 | 241 | 243 | 298 | 308 | 200 | 206 | 234 | 252 |
| 11rbl.094 | 137 | 137 | 76 | 76 | 144 | 144 | 230 | 240 | 251 | 253 | 298 | 298 | 196 | 208 | 238 | 252 |
| 11rbl.101 | 137 | 137 | 76 | 76 | 156 | 156 | 226 | 230 | 251 | 251 | 288 | 294 | 196 | 202 | 230 | 234 |
| 11rbl.105 | 135 | 137 | 76 | 76 | 144 | 144 | 230 | 246 | 241 | 251 | 302 | 310 | 200 | 202 | 216 | 240 |
| 11rbl.115 | 135 | 137 | 76 | 76 | 144 | 158 | 228 | 228 | 249 | 253 | 292 | 296 | 202 | 202 | 238 | 262 |
| 11rbl.119 | 135 | 137 | 76 | 76 | 144 | 156 | 222 | 224 | 251 | 251 | 294 | 294 | 200 | 206 | 200 | 238 |
| 11rbl.138 | 137 | 137 | 76 | 76 | 144 | 144 | 238 | 238 | 253 | 259 | 302 | 302 | 196 | 202 | 224 | 240 |
| 11rbl.147 | 137 | 137 | 76 | 78 | 144 | 144 | 222 | 230 | 245 | 249 | 300 | 304 | 196 | 200 | 212 | 238 |
| 11rbl.151 | 137 | 137 | 76 | 76 | 144 | 144 | 224 | 236 | 249 | 249 | 300 | 302 | 196 | 202 | 222 | 230 |
| 11rbl.158 | 137 | 137 | 74 | 76 | 150 | 156 | 212 | 224 | 249 | 251 | 296 | 296 | 202 | 206 | 240 | 240 |
| 11rbl.159 | 137 | 137 | 76 | 76 | 144 | 188 | 238 | 240 | 249 | 255 | 300 | 300 | 200 | 202 | 240 | 254 |
| 11rbl.163 | 135 | 137 | 76 | 76 | 144 | 144 | 236 | 238 | 243 | 259 | 310 | 318 | 200 | 204 | 214 | 250 |
| 11rbl.164 | 137 | 137 | 76 | 76 | 144 | 156 | 222 | 230 | 243 | 253 | 296 | 310 | 200 | 202 | 230 | 254 |
| 11rbl.171 | 137 | 137 | 76 | 76 | 144 | 156 | 230 | 230 | 249 | 253 | 296 | 300 | 200 | 204 | 220 | 234 |
| 11rbl.176 | 137 | 137 | 76 | 78 | 144 | 174 | 228 | 236 | 251 | 255 | 302 | 302 | 200 | 206 | 216 | 238 |
| 11rbl.178 | 135 | 137 | 76 | 76 | 160 | 160 | 230 | 240 | 243 | 259 | 292 | 302 | 160 | 202 | 218 | 234 |
| 11rbl.182 | 137 | 137 | 76 | 76 | 144 | 156 | 222 | 248 | 251 | 255 | 302 | 304 | 196 | 202 | 234 | 234 |
| 11rbl.185 | 135 | 137 | 76 | 76 | 158 | 158 | 222 | 230 | 245 | 249 | 296 | 302 | 202 | 210 | 236 | 240 |
| 11rbl.187 | 135 | 137 | 76 | 76 | 144 | 152 | 226 | 244 | 243 | 251 | 296 | 302 | 200 | 202 | 234 | 238 |
| 11rbl.189 | 135 | 135 | 76 | 78 | 156 | 156 | 230 | 240 | 239 | 255 | 294 | 298 | 200 | 206 | 194 | 236 |
| 11rbl.194 | 137 | 137 | 76 | 76 | 144 | 174 | 224 | 224 | 245 | 253 | 300 | 304 | 198 | 200 | 226 | 240 |
| 11rbl.195 | 137 | 137 | 76 | 76 | 144 | 164 | 212 | 222 | 243 | 251 | 294 | 304 | 200 | 200 | 218 | 240 |
| 11rbl.211 | 137 | 137 | 76 | 76 | 144 | 156 | 224 | 240 | 239 | 255 | 296 | 300 | 196 | 198 | 238 | 244 |
| 11rbl.212 | 137 | 137 | 76 | 76 | 144 | 156 | 222 | 240 | 241 | 249 | 294 | 294 | 198 | 200 | 236 | 238 |
| 11rbl.213 | 137 | 137 | 76 | 76 | 156 | 162 | 226 | 234 | 251 | 255 | 294 | 302 | 160 | 204 | 196 | 220 |
| 11rbl.215 | 135 | 137 | 76 | 76 | 156 | 158 | 224 | 238 | 253 | 259 | 294 | 302 | 196 | 200 | 220 | 232 |
| 11rbl.216 | 137 | 137 | 76 | 76 | 152 | 198 | 224 | 240 | 249 | 251 | 296 | 296 | 198 | 204 | 234 | 234 |
| 11rbl.217 | 137 | 137 | 76 | 76 | 156 | 164 | 222 | 238 | 239 | 249 | 296 | 302 | 160 | 198 | 220 | 230 |
| 11rbl.223 | 137 | 137 | 76 | 76 | 144 | 156 | 214 | 230 | 253 | 253 | 296 | 300 | 194 | 210 | 236 | 242 |
| 11rbl.225 | 137 | 137 | 76 | 76 | 156 | 164 | 222 | 230 | 241 | 243 | 296 | 302 | 200 | 202 | 214 | 224 |
| 11rbl.230 | 135 | 137 | 76 | 76 | 144 | 156 | 224 | 232 | 243 | 255 | 296 | 310 | 202 | 202 | 212 | 232 |
| 11rbl.233 | 135 | 137 | 76 | 76 | 144 | 184 | 226 | 240 | 239 | 253 | 300 | 300 | 202 | 206 | 220 | 236 |
| 11rbl.238 | 135 | 137 | 76 | 76 | 144 | 198 | 230 | 230 | 249 | 249 | 296 | 302 | 200 | 202 | 214 | 218 |
| 11rbl.245 | 135 | 135 | 76 | 76 | 144 | 182 | 226 | 246 | 249 | 251 | 296 | 302 | 180 | 198 | 222 | 222 |

|           |     |     |    |    |     |     |     |     |     |     |     |     |     |     |     |     |
|-----------|-----|-----|----|----|-----|-----|-----|-----|-----|-----|-----|-----|-----|-----|-----|-----|
| 11rbl.247 | 137 | 137 | 76 | 76 | 144 | 164 | 230 | 248 | 251 | 253 | 298 | 298 | 160 | 196 | 220 | 232 |
| 11rbl.252 | 135 | 137 | 76 | 76 | 144 | 156 | 222 | 246 | 249 | 255 | 296 | 304 | 196 | 202 | 220 | 242 |
| 11rbl.261 | 135 | 137 | 76 | 76 | 144 | 144 | 230 | 230 | 249 | 259 | 296 | 300 | 196 | 214 | 216 | 228 |
| 11rbl.263 | 135 | 137 | 76 | 78 | 144 | 176 | 230 | 260 | 243 | 243 | 300 | 300 | 200 | 210 | 220 | 234 |
| 11rbl.265 | 137 | 137 | 76 | 94 | 144 | 144 | 222 | 244 | 251 | 253 | 296 | 302 | 196 | 202 | 238 | 238 |
| 11rbl.271 | 135 | 137 | 76 | 76 | 144 | 156 | 238 | 240 | 239 | 249 | 296 | 300 | 180 | 200 | 220 | 234 |
| 11rbl.282 | 135 | 137 | 76 | 76 | 144 | 144 | 230 | 246 | 249 | 251 | 302 | 310 | 200 | 202 | 246 | 258 |
| 11rbl.287 | 137 | 137 | 76 | 76 | 172 | 192 | 222 | 222 | 249 | 253 | 300 | 300 | 160 | 196 | 240 | 248 |
| 11rbl.290 | 137 | 137 | 76 | 76 | 144 | 144 | 228 | 232 | 249 | 251 | 304 | 304 | 198 | 198 | 220 | 240 |
| 11rbl.293 | 135 | 137 | 76 | 76 | 144 | 156 | 226 | 260 | 243 | 243 | 292 | 302 | 202 | 206 | 234 | 234 |
| 11rbl.299 | 135 | 137 | 76 | 76 | 156 | 164 | 230 | 238 | 251 | 257 | 298 | 298 | 204 | 210 | 232 | 246 |
| 11rbl.302 | 135 | 137 | 76 | 76 | 144 | 160 | 232 | 252 | 249 | 251 | 298 | 300 | 196 | 200 | 226 | 252 |
| 11rbl.303 | 135 | 137 | 76 | 76 | 144 | 156 | 222 | 250 | 243 | 251 | 286 | 298 | 200 | 202 | 220 | 236 |
| 11rbl.309 | 137 | 137 | 76 | 76 | 156 | 176 | 224 | 224 | 251 | 253 | 296 | 300 | 200 | 204 | 212 | 240 |
| 11rbl.310 | 137 | 137 | 76 | 76 | 144 | 144 | 214 | 238 | 251 | 253 | 292 | 302 | 200 | 202 | 192 | 236 |
| 11rbl.312 | 135 | 137 | 76 | 76 | 144 | 144 | 230 | 244 | 243 | 253 | 292 | 298 | 196 | 202 | 220 | 236 |
| 11rbl.313 | 137 | 137 | 76 | 78 | 156 | 162 | 224 | 236 | 245 | 257 | 296 | 298 | 196 | 210 | 222 | 254 |
| 11rbl.317 | 137 | 137 | 76 | 76 | 144 | 144 | 230 | 234 | 243 | 251 | 292 | 298 | 202 | 202 | 228 | 234 |
| 11rbl.318 | 137 | 137 | 76 | 78 | 144 | 146 | 214 | 224 | 243 | 255 | 292 | 296 | 202 | 206 | 220 | 236 |
| 11rbl.320 | 137 | 137 | 76 | 76 | 144 | 156 | 230 | 248 | 245 | 249 | 294 | 300 | 202 | 206 | 192 | 234 |
| 11rbl.321 | 137 | 137 | 76 | 78 | 144 | 156 | 214 | 222 | 243 | 251 | 274 | 300 | 200 | 200 | 234 | 240 |
| 11rbl.331 | 137 | 137 | 76 | 76 | 156 | 176 | 230 | 242 | 253 | 255 | 306 | 310 | 196 | 202 | 220 | 236 |
| 11rbl.338 | 135 | 137 | 76 | 76 | 144 | 188 | 226 | 248 | 251 | 261 | 298 | 298 | 196 | 196 | 234 | 234 |
| 11rbl.341 | 137 | 137 | 76 | 76 | 144 | 180 | 234 | 238 | 243 | 249 | 292 | 306 | 202 | 202 | 234 | 250 |
| 11rbl.345 | 137 | 137 | 76 | 76 | 144 | 144 | 224 | 224 | 239 | 241 | 296 | 302 | 196 | 200 | 218 | 238 |
| 11rbl.346 | 135 | 137 | 76 | 76 | 146 | 152 | 220 | 228 | 253 | 253 | 294 | 302 | 202 | 202 | 218 | 238 |
| 11rbl.352 | 137 | 137 | 76 | 76 | 156 | 156 | 236 | 246 | 249 | 251 | 302 | 302 | 202 | 202 | 220 | 234 |
| 11rbl.354 | 137 | 137 | 76 | 76 | 144 | 162 | 222 | 224 | 251 | 253 | 296 | 300 | 196 | 200 | 234 | 258 |
| 11rbl.356 | 137 | 137 | 76 | 76 | 152 | 184 | 228 | 230 | 245 | 249 | 300 | 300 | 200 | 202 | 200 | 236 |
| 11rbl.360 | 137 | 137 | 76 | 78 | 144 | 176 | 230 | 232 | 249 | 251 | 296 | 302 | 196 | 196 | 220 | 250 |
| 11rbl.361 | 137 | 137 | 76 | 76 | 144 | 156 | 224 | 230 | 243 | 249 | 298 | 302 | 180 | 196 | 220 | 262 |
| 11rbl.367 | 137 | 137 | 76 | 76 | 144 | 144 | 224 | 238 | 259 | 259 | 294 | 310 | 196 | 200 | 220 | 252 |
| 11rbl.368 | 135 | 137 | 76 | 76 | 144 | 144 | 224 | 230 | 255 | 259 | 300 | 300 | 196 | 200 | 226 | 242 |
| 11rbl.375 | 135 | 137 | 76 | 76 | 144 | 144 | 224 | 230 | 249 | 251 | 298 | 304 | 200 | 202 | 222 | 228 |
| 11rbl.376 | 135 | 135 | 76 | 76 | 144 | 146 | 212 | 246 | 249 | 251 | 302 | 302 | 160 | 204 | 216 | 240 |
| 11rbl.390 | 137 | 137 | 76 | 78 | 144 | 156 | 228 | 246 | 245 | 249 | 302 | 302 | 200 | 206 | 212 | 230 |
| 11rbl.400 | 137 | 137 | 72 | 76 | 150 | 156 | 212 | 220 | 245 | 251 | 298 | 298 | 200 | 200 | 192 | 212 |

|           |     |     |    |    |     |     |     |     |     |     |     |     |     |     |     |     |
|-----------|-----|-----|----|----|-----|-----|-----|-----|-----|-----|-----|-----|-----|-----|-----|-----|
| 11rbl.404 | 135 | 137 | 76 | 76 | 144 | 174 | 224 | 254 | 249 | 249 | 310 | 310 | 200 | 200 | 222 | 234 |
| 11rbl.406 | 135 | 137 | 76 | 76 | 158 | 158 | 228 | 240 | 251 | 253 | 296 | 296 | 192 | 200 | 236 | 240 |
| 11rbl.411 | 137 | 137 | 76 | 76 | 144 | 144 | 224 | 226 | 249 | 255 | 298 | 298 | 198 | 202 | 228 | 230 |
| 11rbl.415 | 137 | 137 | 76 | 76 | 156 | 156 | 222 | 238 | 249 | 253 | 300 | 300 | 196 | 196 | 218 | 238 |
| 11rbl.421 | 135 | 137 | 76 | 76 | 158 | 180 | 222 | 260 | 249 | 249 | 302 | 302 | 200 | 202 | 216 | 234 |
| 11rbl.422 | 135 | 137 | 76 | 76 | 144 | 156 | 222 | 230 | 249 | 259 | 292 | 298 | 192 | 204 | 240 | 252 |
| 11rbl.429 | 137 | 137 | 72 | 76 | 144 | 144 | 224 | 240 | 249 | 255 | 300 | 304 | 160 | 206 | 220 | 234 |
| 11rbl.436 | 135 | 137 | 76 | 76 | 156 | 176 | 220 | 230 | 243 | 255 | 296 | 306 | 196 | 200 | 222 | 236 |
| 11rbl.441 | 137 | 137 | 76 | 78 | 144 | 158 | 222 | 226 | 243 | 259 | 302 | 302 | 196 | 204 | 220 | 236 |
| 11rbl.442 | 137 | 137 | 76 | 76 | 158 | 184 | 224 | 228 | 243 | 249 | 302 | 302 | 202 | 202 | 234 | 236 |
| 11rbl.448 | 137 | 137 | 76 | 94 | 156 | 156 | 230 | 238 | 251 | 253 | 300 | 300 | 196 | 206 | 226 | 238 |
| 11rbl.451 | 137 | 137 | 76 | 76 | 146 | 156 | 222 | 238 | 249 | 251 | 294 | 300 | 196 | 206 | 220 | 226 |
| 11rbl.452 | 137 | 137 | 76 | 76 | 144 | 194 | 224 | 230 | 249 | 253 | 302 | 306 | 200 | 206 | 240 | 240 |
| 11rbl.454 | 137 | 137 | 76 | 76 | 144 | 152 | 230 | 246 | 249 | 249 | 300 | 306 | 180 | 200 | 192 | 236 |
| 11rbl.463 | 137 | 137 | 76 | 76 | 0   | 0   | 224 | 240 | 243 | 249 | 304 | 308 | 178 | 200 | 238 | 238 |
| 11rbl.466 | 135 | 137 | 76 | 76 | 156 | 164 | 222 | 238 | 241 | 253 | 308 | 308 | 200 | 204 | 218 | 220 |
| 11rbl.469 | 135 | 137 | 76 | 76 | 150 | 166 | 220 | 230 | 243 | 259 | 300 | 302 | 200 | 200 | 222 | 250 |
| 11rbl.482 | 137 | 137 | 76 | 76 | 144 | 158 | 224 | 230 | 241 | 253 | 302 | 318 | 202 | 204 | 212 | 270 |
| 11rbl.491 | 135 | 137 | 76 | 76 | 144 | 158 | 224 | 226 | 243 | 251 | 296 | 304 | 198 | 202 | 234 | 238 |
| 11rbl.501 | 137 | 137 | 76 | 78 | 156 | 156 | 224 | 230 | 243 | 249 | 294 | 304 | 200 | 202 | 224 | 238 |
| 11rbl.502 | 137 | 137 | 76 | 78 | 144 | 144 | 234 | 238 | 249 | 251 | 302 | 302 | 202 | 204 | 212 | 232 |
| 11rbl.507 | 137 | 137 | 74 | 76 | 144 | 144 | 238 | 238 | 243 | 255 | 294 | 304 | 196 | 200 | 214 | 240 |
| 11rbl.510 | 137 | 137 | 76 | 76 | 144 | 156 | 212 | 230 | 255 | 255 | 300 | 302 | 200 | 200 | 192 | 232 |
| 11rbl.516 | 137 | 137 | 76 | 76 | 144 | 152 | 224 | 246 | 243 | 251 | 298 | 304 | 196 | 202 | 234 | 252 |
| 11rbl.521 | 137 | 137 | 76 | 76 | 144 | 144 | 214 | 220 | 243 | 245 | 298 | 300 | 196 | 200 | 212 | 254 |
| 11rbl.522 | 135 | 137 | 76 | 76 | 144 | 176 | 222 | 222 | 241 | 241 | 294 | 300 | 196 | 206 | 220 | 224 |
| 11rbl.529 | 137 | 137 | 72 | 76 | 144 | 144 | 222 | 230 | 243 | 243 | 302 | 302 | 202 | 206 | 234 | 238 |

| Sample ID | Xte17 | Xte17 | Xte18 | Xte18 | Xte19 | Xte19 | Xte20 | Xte20 | Xte22 | Xte22 | Xte24 | Xte24 | Xte25 | Xte25 |
|-----------|-------|-------|-------|-------|-------|-------|-------|-------|-------|-------|-------|-------|-------|-------|
| 97rbl.002 | 214   | 232   | 282   | 290   | 210   | 220   | 274   | 274   | 174   | 204   | 272   | 284   | 110   | 110   |
| 97rbl.008 | 216   | 224   | 290   | 290   | 202   | 218   | 298   | 308   | 160   | 160   | 266   | 270   | 110   | 110   |
| 97rbl.009 | 226   | 226   | 282   | 282   | 218   | 222   | 298   | 298   | 188   | 196   | 286   | 298   | 110   | 110   |
| 97rbl.010 | 224   | 224   | 282   | 286   | 202   | 220   | 280   | 280   | 150   | 168   | 274   | 274   | 110   | 112   |
| 97rbl.011 | 212   | 224   | 282   | 288   | 214   | 218   | 280   | 298   | 174   | 186   | 274   | 288   | 110   | 110   |
| 97rbl.018 | 214   | 254   | 282   | 290   | 212   | 214   | 284   | 298   | 174   | 174   | 266   | 288   | 110   | 112   |
| 97rbl.021 | 214   | 222   | 292   | 292   | 214   | 214   | 268   | 298   | 174   | 174   | 268   | 286   | 110   | 112   |
| 97rbl.029 | 214   | 218   | 282   | 292   | 214   | 216   | 282   | 296   | 170   | 170   | 262   | 302   | 110   | 110   |
| 97rbl.031 | 224   | 226   | 290   | 290   | 216   | 222   | 284   | 284   | 192   | 212   | 262   | 284   | 110   | 110   |
| 97rbl.032 | 214   | 214   | 286   | 290   | 214   | 218   | 278   | 298   | 188   | 202   | 276   | 298   | 110   | 110   |
| 97rbl.034 | 224   | 234   | 290   | 290   | 202   | 218   | 270   | 294   | 194   | 200   | 272   | 306   | 110   | 110   |
| 97rbl.040 | 224   | 230   | 284   | 286   | 206   | 216   | 280   | 308   | 166   | 204   | 276   | 282   | 110   | 110   |
| 97rbl.041 | 222   | 230   | 282   | 282   | 212   | 214   | 254   | 294   | 174   | 192   | 282   | 288   | 110   | 112   |
| 97rbl.043 | 222   | 226   | 288   | 294   | 218   | 218   | 306   | 308   | 170   | 202   | 282   | 292   | 110   | 110   |
| 97rbl.045 | 216   | 216   | 286   | 290   | 214   | 214   | 256   | 272   | 166   | 168   | 288   | 298   | 110   | 112   |
| 97rbl.048 | 228   | 250   | 286   | 286   | 212   | 214   | 220   | 270   | 206   | 208   | 276   | 288   | 110   | 110   |
| 97rbl.051 | 224   | 226   | 288   | 292   | 214   | 232   | 272   | 300   | 200   | 200   | 284   | 294   | 110   | 112   |
| 97rbl.055 | 212   | 224   | 282   | 282   | 214   | 214   | 294   | 296   | 168   | 212   | 284   | 288   | 110   | 112   |
| 97rbl.062 | 224   | 226   | 286   | 290   | 214   | 216   | 280   | 304   | 168   | 168   | 284   | 300   | 110   | 110   |
| 97rbl.068 | 224   | 238   | 282   | 286   | 212   | 216   | 292   | 292   | 182   | 182   | 288   | 294   | 110   | 112   |
| 97rbl.070 | 224   | 234   | 0     | 0     | 216   | 218   | 268   | 270   | 150   | 166   | 292   | 296   | 110   | 110   |
| 97rbl.072 | 212   | 224   | 282   | 290   | 210   | 214   | 252   | 288   | 170   | 170   | 270   | 286   | 110   | 110   |
| 97rbl.076 | 212   | 224   | 282   | 286   | 214   | 218   | 270   | 300   | 150   | 170   | 288   | 290   | 110   | 110   |
| 97rbl.077 | 222   | 226   | 282   | 284   | 214   | 214   | 268   | 282   | 182   | 182   | 276   | 288   | 110   | 110   |
| 97rbl.080 | 214   | 248   | 282   | 284   | 210   | 216   | 272   | 272   | 210   | 210   | 264   | 270   | 110   | 110   |
| 97rbl.082 | 212   | 218   | 286   | 290   | 202   | 214   | 288   | 296   | 198   | 214   | 278   | 296   | 110   | 110   |
| 97rbl.084 | 214   | 222   | 282   | 286   | 214   | 214   | 254   | 298   | 180   | 180   | 294   | 298   | 110   | 110   |
| 97rbl.085 | 238   | 244   | 288   | 292   | 204   | 228   | 276   | 300   | 170   | 172   | 264   | 270   | 110   | 110   |
| 97rbl.095 | 218   | 224   | 282   | 284   | 214   | 230   | 280   | 280   | 150   | 150   | 268   | 292   | 110   | 110   |
| 97rbl.102 | 214   | 222   | 282   | 284   | 214   | 214   | 280   | 296   | 188   | 188   | 268   | 274   | 110   | 110   |
| 97rbl.105 | 226   | 226   | 282   | 286   | 214   | 214   | 272   | 276   | 170   | 170   | 286   | 292   | 114   | 114   |
| 97rbl.106 | 214   | 244   | 282   | 282   | 208   | 218   | 270   | 294   | 194   | 194   | 264   | 282   | 110   | 110   |
| 97rbl.107 | 214   | 214   | 280   | 284   | 204   | 204   | 288   | 288   | 168   | 168   | 286   | 298   | 110   | 112   |
| 97rbl.108 | 226   | 226   | 288   | 290   | 216   | 224   | 258   | 282   | 204   | 206   | 280   | 294   | 110   | 110   |
| 97rbl.110 | 214   | 224   | 282   | 290   | 210   | 218   | 264   | 294   | 168   | 168   | 286   | 298   | 110   | 114   |
| 97rbl.111 | 214   | 224   | 286   | 290   | 212   | 236   | 268   | 274   | 196   | 196   | 290   | 300   | 110   | 112   |

|           |     |     |     |     |     |     |     |     |     |     |     |     |     |     |
|-----------|-----|-----|-----|-----|-----|-----|-----|-----|-----|-----|-----|-----|-----|-----|
| 97rbl.112 | 212 | 224 | 290 | 290 | 202 | 208 | 286 | 298 | 192 | 210 | 280 | 296 | 112 | 112 |
| 97rbl.113 | 224 | 226 | 292 | 292 | 214 | 222 | 304 | 322 | 200 | 202 | 284 | 302 | 110 | 110 |
| 97rbl.117 | 220 | 222 | 282 | 292 | 212 | 222 | 290 | 290 | 202 | 204 | 284 | 292 | 110 | 110 |
| 97rbl.120 | 214 | 218 | 286 | 286 | 216 | 222 | 256 | 288 | 168 | 194 | 278 | 294 | 110 | 112 |
| 97rbl.122 | 224 | 224 | 284 | 290 | 214 | 218 | 282 | 292 | 204 | 218 | 282 | 294 | 110 | 110 |
| 97rbl.125 | 244 | 252 | 284 | 286 | 214 | 218 | 296 | 298 | 204 | 208 | 292 | 294 | 110 | 110 |
| 97rbl.130 | 226 | 228 | 292 | 294 | 214 | 216 | 252 | 296 | 178 | 178 | 278 | 300 | 110 | 110 |
| 97rbl.132 | 226 | 246 | 284 | 284 | 214 | 222 | 282 | 298 | 172 | 190 | 288 | 294 | 110 | 112 |
| 97rbl.133 | 224 | 224 | 290 | 290 | 212 | 218 | 264 | 304 | 194 | 194 | 282 | 284 | 110 | 114 |
| 97rbl.138 | 226 | 226 | 282 | 284 | 210 | 230 | 296 | 300 | 210 | 210 | 274 | 284 | 110 | 114 |
| 97rbl.141 | 214 | 224 | 282 | 282 | 208 | 218 | 284 | 298 | 180 | 208 | 266 | 284 | 106 | 110 |
| 97rbl.143 | 220 | 226 | 282 | 286 | 210 | 210 | 270 | 276 | 150 | 166 | 262 | 290 | 110 | 110 |
| 97rbl.144 | 220 | 246 | 282 | 286 | 218 | 226 | 272 | 298 | 174 | 216 | 300 | 300 | 110 | 110 |
| 97rbl.145 | 220 | 226 | 282 | 282 | 218 | 220 | 298 | 304 | 166 | 194 | 280 | 298 | 110 | 112 |
| 97rbl.146 | 224 | 244 | 284 | 284 | 212 | 222 | 254 | 284 | 150 | 150 | 286 | 300 | 110 | 110 |
| 97rbl.150 | 218 | 222 | 282 | 286 | 216 | 218 | 284 | 292 | 194 | 216 | 284 | 298 | 110 | 110 |
| 97rbl.160 | 226 | 232 | 286 | 292 | 218 | 218 | 252 | 284 | 178 | 198 | 286 | 290 | 110 | 110 |
| 97rbl.163 | 224 | 228 | 284 | 284 | 202 | 218 | 292 | 294 | 150 | 150 | 278 | 290 | 110 | 110 |
| 97rbl.166 | 214 | 224 | 288 | 290 | 214 | 218 | 258 | 286 | 150 | 150 | 284 | 286 | 110 | 112 |
| 97rbl.168 | 222 | 226 | 286 | 290 | 214 | 218 | 290 | 304 | 150 | 156 | 284 | 292 | 110 | 114 |
| 97rbl.169 | 216 | 220 | 282 | 286 | 214 | 218 | 266 | 272 | 166 | 188 | 292 | 296 | 110 | 110 |
| 97rbl.170 | 226 | 230 | 290 | 290 | 208 | 210 | 286 | 286 | 168 | 208 | 284 | 296 | 110 | 110 |
| 97rbl.174 | 216 | 228 | 290 | 290 | 214 | 222 | 292 | 304 | 224 | 224 | 268 | 288 | 110 | 110 |
| 97rbl.175 | 212 | 232 | 290 | 290 | 210 | 210 | 270 | 272 | 170 | 216 | 290 | 296 | 110 | 110 |
| 97rbl.177 | 226 | 228 | 282 | 282 | 214 | 222 | 298 | 304 | 170 | 228 | 268 | 276 | 110 | 110 |
| 97rbl.185 | 224 | 228 | 286 | 290 | 214 | 222 | 286 | 290 | 168 | 188 | 284 | 284 | 110 | 110 |
| 97rbl.187 | 212 | 226 | 286 | 290 | 202 | 220 | 272 | 298 | 210 | 210 | 278 | 296 | 110 | 110 |
| 97rbl.193 | 212 | 224 | 286 | 286 | 208 | 214 | 288 | 294 | 170 | 210 | 276 | 294 | 110 | 110 |
| 97rbl.194 | 224 | 226 | 282 | 288 | 214 | 220 | 252 | 270 | 150 | 204 | 268 | 300 | 110 | 114 |
| 97rbl.195 | 222 | 226 | 282 | 288 | 212 | 214 | 284 | 306 | 150 | 190 | 282 | 282 | 110 | 112 |
| 97rbl.196 | 226 | 228 | 282 | 282 | 208 | 214 | 274 | 302 | 150 | 216 | 288 | 296 | 110 | 110 |
| 97rbl.199 | 222 | 226 | 284 | 290 | 210 | 212 | 292 | 292 | 174 | 226 | 268 | 302 | 110 | 110 |
| 97rbl.200 | 212 | 224 | 282 | 290 | 210 | 214 | 272 | 304 | 218 | 218 | 284 | 290 | 110 | 112 |
| 97rbl.208 | 214 | 224 | 290 | 290 | 218 | 222 | 282 | 300 | 168 | 170 | 286 | 292 | 110 | 110 |
| 97rbl.209 | 216 | 222 | 290 | 290 | 202 | 232 | 286 | 300 | 172 | 172 | 274 | 278 | 110 | 112 |
| 97rbl.211 | 214 | 224 | 282 | 286 | 212 | 232 | 272 | 294 | 150 | 172 | 274 | 276 | 110 | 112 |
| 97rbl.213 | 216 | 224 | 292 | 292 | 212 | 232 | 272 | 292 | 198 | 214 | 270 | 270 | 110 | 112 |

|           |     |     |     |     |     |     |     |     |     |     |     |     |     |     |
|-----------|-----|-----|-----|-----|-----|-----|-----|-----|-----|-----|-----|-----|-----|-----|
| 97rbl.215 | 224 | 226 | 286 | 290 | 214 | 232 | 292 | 292 | 172 | 172 | 288 | 300 | 110 | 110 |
| 97rbl.216 | 222 | 224 | 280 | 290 | 202 | 208 | 280 | 284 | 168 | 194 | 274 | 274 | 110 | 110 |
| 97rbl.221 | 222 | 224 | 280 | 290 | 202 | 208 | 280 | 284 | 168 | 214 | 276 | 276 | 110 | 110 |
| 97rbl.224 | 228 | 256 | 280 | 290 | 212 | 218 | 282 | 282 | 186 | 202 | 274 | 278 | 110 | 110 |
| 97rbl.226 | 214 | 224 | 284 | 286 | 222 | 232 | 290 | 300 | 170 | 188 | 270 | 290 | 112 | 112 |
| 97rbl.228 | 224 | 228 | 282 | 290 | 212 | 222 | 292 | 300 | 150 | 182 | 288 | 290 | 110 | 112 |
| 97rbl.232 | 224 | 224 | 284 | 292 | 216 | 220 | 306 | 306 | 160 | 184 | 278 | 284 | 110 | 110 |
| 97rbl.235 | 218 | 224 | 282 | 290 | 210 | 218 | 292 | 296 | 202 | 204 | 284 | 288 | 110 | 110 |
| 97rbl.237 | 212 | 224 | 280 | 290 | 216 | 218 | 286 | 286 | 190 | 202 | 284 | 284 | 110 | 110 |
| 97rbl.238 | 228 | 246 | 282 | 286 | 218 | 234 | 286 | 286 | 184 | 190 | 282 | 282 | 110 | 112 |
| 97rbl.239 | 218 | 232 | 282 | 284 | 212 | 216 | 294 | 296 | 170 | 204 | 278 | 278 | 110 | 110 |
| 97rbl.241 | 212 | 242 | 282 | 284 | 218 | 220 | 286 | 286 | 188 | 190 | 286 | 286 | 110 | 112 |
| 97rbl.243 | 212 | 226 | 286 | 286 | 206 | 226 | 220 | 292 | 198 | 198 | 298 | 306 | 110 | 112 |
| 97rbl.246 | 214 | 224 | 286 | 292 | 212 | 218 | 292 | 296 | 150 | 150 | 274 | 280 | 110 | 110 |
| 97rbl.251 | 224 | 224 | 286 | 288 | 210 | 216 | 288 | 290 | 178 | 182 | 278 | 278 | 110 | 110 |
| 97rbl.252 | 214 | 228 | 288 | 290 | 220 | 220 | 286 | 290 | 150 | 170 | 278 | 278 | 110 | 110 |
| 97rbl.255 | 224 | 228 | 290 | 290 | 208 | 212 | 280 | 308 | 186 | 188 | 296 | 298 | 110 | 110 |
| 97rbl.260 | 214 | 222 | 288 | 290 | 210 | 214 | 288 | 294 | 166 | 182 | 286 | 286 | 110 | 110 |
| 97rbl.269 | 214 | 214 | 282 | 290 | 210 | 214 | 264 | 264 | 172 | 172 | 280 | 282 | 110 | 110 |
| 97rbl.272 | 222 | 228 | 284 | 290 | 212 | 212 | 272 | 274 | 190 | 190 | 280 | 296 | 110 | 114 |
| 97rbl.280 | 224 | 226 | 282 | 282 | 202 | 208 | 272 | 288 | 174 | 174 | 274 | 284 | 112 | 112 |
| 97rbl.283 | 232 | 232 | 284 | 284 | 210 | 218 | 302 | 306 | 168 | 182 | 282 | 288 | 110 | 110 |
| 97rbl.289 | 214 | 224 | 286 | 290 | 208 | 232 | 290 | 298 | 170 | 192 | 290 | 290 | 110 | 110 |
| 97rbl.294 | 224 | 224 | 282 | 290 | 214 | 214 | 298 | 308 | 150 | 176 | 266 | 288 | 110 | 110 |
| 97rbl.295 | 212 | 232 | 282 | 288 | 216 | 220 | 272 | 308 | 202 | 222 | 276 | 298 | 110 | 110 |
| 97rbl.297 | 222 | 232 | 282 | 292 | 202 | 218 | 268 | 304 | 150 | 172 | 284 | 284 | 110 | 110 |
| 97rbl.303 | 214 | 224 | 282 | 282 | 202 | 214 | 254 | 306 | 196 | 196 | 284 | 284 | 110 | 110 |
| 97rbl.305 | 228 | 242 | 280 | 284 | 202 | 218 | 288 | 298 | 198 | 210 | 294 | 298 | 110 | 110 |
| 97rbl.308 | 224 | 224 | 282 | 286 | 212 | 214 | 268 | 268 | 150 | 176 | 268 | 300 | 110 | 112 |
| 97rbl.312 | 224 | 224 | 282 | 292 | 210 | 212 | 272 | 286 | 168 | 200 | 262 | 294 | 110 | 110 |
| 97rbl.318 | 226 | 226 | 282 | 286 | 214 | 214 | 270 | 282 | 206 | 218 | 284 | 294 | 110 | 110 |
| 97rbl.324 | 224 | 226 | 282 | 286 | 214 | 216 | 270 | 296 | 176 | 184 | 290 | 300 | 110 | 110 |
| 97rbl.328 | 218 | 224 | 282 | 290 | 214 | 218 | 284 | 310 | 194 | 204 | 292 | 298 | 110 | 112 |
| 97rbl.331 | 212 | 224 | 282 | 282 | 212 | 222 | 292 | 302 | 176 | 200 | 280 | 302 | 110 | 110 |
| 97rbl.333 | 218 | 226 | 284 | 290 | 214 | 214 | 288 | 308 | 168 | 170 | 262 | 286 | 110 | 112 |
| 97rbl.335 | 214 | 228 | 282 | 286 | 202 | 218 | 272 | 274 | 172 | 202 | 282 | 296 | 110 | 112 |
| 97rbl.336 | 214 | 246 | 290 | 298 | 208 | 214 | 280 | 286 | 202 | 202 | 280 | 284 | 110 | 112 |

|           |     |     |     |     |     |     |     |     |     |     |     |     |     |     |
|-----------|-----|-----|-----|-----|-----|-----|-----|-----|-----|-----|-----|-----|-----|-----|
| 97rbl.339 | 224 | 236 | 284 | 286 | 210 | 218 | 270 | 292 | 170 | 192 | 286 | 290 | 112 | 112 |
| 97rbl.347 | 224 | 224 | 282 | 286 | 216 | 218 | 272 | 298 | 180 | 216 | 276 | 284 | 110 | 114 |
| 97rbl.349 | 220 | 224 | 282 | 290 | 202 | 214 | 278 | 290 | 0   | 0   | 300 | 300 | 110 | 112 |
| 97rbl.351 | 218 | 218 | 286 | 290 | 210 | 214 | 290 | 302 | 168 | 170 | 280 | 292 | 110 | 112 |
| 97rbl.357 | 224 | 226 | 282 | 282 | 212 | 214 | 270 | 290 | 166 | 174 | 280 | 292 | 110 | 112 |
| 97rbl.359 | 226 | 250 | 282 | 290 | 210 | 222 | 280 | 282 | 150 | 162 | 268 | 280 | 110 | 110 |
| 97rbl.364 | 226 | 228 | 282 | 286 | 214 | 214 | 284 | 288 | 168 | 198 | 274 | 274 | 110 | 112 |
| 97rbl.365 | 212 | 218 | 288 | 290 | 210 | 222 | 284 | 290 | 206 | 206 | 270 | 286 | 110 | 112 |
| 97rbl.368 | 214 | 224 | 282 | 290 | 214 | 218 | 258 | 298 | 150 | 150 | 284 | 288 | 110 | 110 |
| 97rbl.370 | 212 | 214 | 286 | 286 | 208 | 222 | 292 | 292 | 170 | 196 | 282 | 288 | 110 | 116 |
| 98rbl.001 | 224 | 228 | 282 | 290 | 202 | 216 | 276 | 300 | 208 | 208 | 276 | 280 | 110 | 110 |
| 98rbl.002 | 224 | 226 | 286 | 286 | 210 | 214 | 272 | 294 | 192 | 200 | 264 | 286 | 110 | 110 |
| 98rbl.007 | 228 | 228 | 282 | 290 | 210 | 212 | 274 | 292 | 174 | 200 | 276 | 306 | 110 | 110 |
| 98rbl.008 | 214 | 222 | 282 | 286 | 208 | 212 | 298 | 306 | 192 | 196 | 274 | 274 | 110 | 110 |
| 98rbl.010 | 214 | 238 | 282 | 282 | 212 | 218 | 278 | 292 | 168 | 218 | 284 | 288 | 110 | 110 |
| 98rbl.020 | 232 | 252 | 282 | 282 | 214 | 214 | 276 | 280 | 188 | 192 | 280 | 280 | 112 | 114 |
| 98rbl.021 | 230 | 232 | 286 | 290 | 210 | 216 | 280 | 312 | 190 | 192 | 288 | 300 | 110 | 112 |
| 98rbl.026 | 224 | 250 | 284 | 288 | 214 | 232 | 284 | 290 | 174 | 178 | 292 | 292 | 110 | 110 |
| 98rbl.031 | 224 | 232 | 282 | 284 | 212 | 214 | 252 | 294 | 204 | 204 | 284 | 290 | 110 | 110 |
| 98rbl.034 | 212 | 220 | 286 | 286 | 208 | 222 | 284 | 292 | 202 | 202 | 278 | 284 | 110 | 112 |
| 98rbl.041 | 212 | 216 | 284 | 290 | 216 | 216 | 268 | 286 | 150 | 176 | 292 | 302 | 110 | 110 |
| 98rbl.042 | 220 | 230 | 282 | 282 | 214 | 220 | 270 | 300 | 150 | 176 | 274 | 296 | 110 | 112 |
| 98rbl.045 | 230 | 230 | 284 | 288 | 212 | 214 | 274 | 312 | 166 | 202 | 292 | 294 | 110 | 110 |
| 98rbl.048 | 216 | 224 | 282 | 294 | 212 | 214 | 284 | 294 | 150 | 150 | 290 | 298 | 110 | 110 |
| 98rbl.049 | 222 | 232 | 284 | 292 | 208 | 228 | 286 | 292 | 150 | 202 | 284 | 296 | 110 | 110 |
| 98rbl.066 | 218 | 222 | 282 | 282 | 212 | 212 | 244 | 246 | 190 | 216 | 288 | 298 | 110 | 112 |
| 98rbl.072 | 224 | 254 | 284 | 286 | 212 | 214 | 286 | 294 | 190 | 196 | 278 | 284 | 112 | 114 |
| 98rbl.073 | 214 | 216 | 282 | 292 | 210 | 222 | 308 | 310 | 150 | 216 | 288 | 288 | 110 | 112 |
| 98rbl.082 | 222 | 222 | 282 | 288 | 212 | 214 | 270 | 288 | 192 | 192 | 266 | 286 | 110 | 110 |
| 98rbl.086 | 214 | 222 | 282 | 286 | 212 | 236 | 254 | 254 | 150 | 194 | 284 | 296 | 110 | 110 |
| 98rbl.088 | 220 | 220 | 282 | 282 | 214 | 216 | 266 | 298 | 172 | 192 | 286 | 300 | 110 | 110 |
| 98rbl.090 | 224 | 238 | 282 | 288 | 204 | 210 | 264 | 278 | 170 | 192 | 284 | 290 | 110 | 110 |
| 98rbl.098 | 222 | 244 | 280 | 284 | 212 | 214 | 272 | 288 | 168 | 188 | 286 | 290 | 110 | 110 |
| 98rbl.100 | 226 | 244 | 282 | 292 | 210 | 214 | 256 | 278 | 166 | 176 | 288 | 300 | 110 | 110 |
| 98rbl.102 | 214 | 224 | 284 | 290 | 212 | 214 | 286 | 290 | 168 | 170 | 272 | 288 | 110 | 110 |
| 98rbl.104 | 224 | 232 | 282 | 292 | 214 | 218 | 272 | 286 | 168 | 168 | 282 | 286 | 110 | 110 |
| 98rbl.114 | 214 | 224 | 280 | 282 | 212 | 214 | 286 | 290 | 168 | 188 | 268 | 268 | 110 | 110 |

|           |     |     |     |     |     |     |     |     |     |     |     |     |     |     |
|-----------|-----|-----|-----|-----|-----|-----|-----|-----|-----|-----|-----|-----|-----|-----|
| 98rbl.120 | 222 | 224 | 284 | 286 | 210 | 222 | 272 | 272 | 214 | 226 | 286 | 290 | 110 | 110 |
| 98rbl.122 | 232 | 252 | 282 | 290 | 208 | 214 | 252 | 274 | 168 | 168 | 278 | 286 | 110 | 112 |
| 98rbl.127 | 216 | 224 | 282 | 290 | 218 | 222 | 272 | 272 | 150 | 170 | 296 | 298 | 110 | 112 |
| 98rbl.128 | 220 | 226 | 286 | 288 | 208 | 230 | 290 | 300 | 192 | 202 | 282 | 286 | 112 | 114 |
| 98rbl.131 | 224 | 232 | 282 | 282 | 208 | 222 | 254 | 286 | 168 | 192 | 280 | 284 | 110 | 110 |
| 98rbl.137 | 212 | 224 | 282 | 288 | 214 | 222 | 280 | 290 | 190 | 208 | 300 | 304 | 110 | 114 |
| 98rbl.140 | 226 | 254 | 284 | 284 | 214 | 214 | 274 | 282 | 168 | 192 | 280 | 290 | 110 | 112 |
| 98rbl.150 | 216 | 226 | 286 | 294 | 210 | 218 | 252 | 308 | 208 | 218 | 262 | 270 | 110 | 114 |
| 98rbl.151 | 214 | 222 | 282 | 284 | 202 | 214 | 272 | 304 | 196 | 202 | 282 | 294 | 110 | 110 |
| 98rbl.153 | 226 | 230 | 284 | 288 | 210 | 212 | 286 | 304 | 192 | 196 | 276 | 294 | 110 | 112 |
| 98rbl.156 | 220 | 220 | 284 | 286 | 214 | 214 | 270 | 290 | 204 | 204 | 290 | 294 | 110 | 112 |
| 98rbl.158 | 216 | 216 | 286 | 290 | 214 | 216 | 286 | 286 | 170 | 226 | 296 | 298 | 110 | 112 |
| 98rbl.160 | 216 | 220 | 282 | 290 | 214 | 214 | 272 | 290 | 178 | 178 | 270 | 290 | 110 | 112 |
| 98rbl.164 | 214 | 218 | 282 | 284 | 214 | 214 | 270 | 296 | 176 | 176 | 270 | 296 | 110 | 112 |
| 98rbl.165 | 214 | 226 | 284 | 290 | 202 | 218 | 286 | 312 | 196 | 200 | 276 | 282 | 112 | 114 |
| 98rbl.169 | 218 | 226 | 282 | 290 | 216 | 218 | 252 | 290 | 166 | 200 | 262 | 282 | 110 | 110 |
| 98rbl.173 | 218 | 226 | 282 | 286 | 214 | 216 | 252 | 290 | 166 | 182 | 262 | 284 | 110 | 110 |
| 98rbl.175 | 216 | 228 | 282 | 282 | 214 | 214 | 262 | 280 | 200 | 202 | 278 | 288 | 110 | 110 |
| 98rbl.183 | 212 | 216 | 288 | 292 | 210 | 214 | 250 | 290 | 182 | 198 | 280 | 302 | 110 | 110 |
| 98rbl.188 | 228 | 228 | 284 | 292 | 222 | 232 | 266 | 308 | 192 | 220 | 292 | 296 | 110 | 110 |
| 98rbl.190 | 226 | 226 | 284 | 300 | 208 | 218 | 276 | 292 | 224 | 224 | 266 | 288 | 110 | 110 |
| 98rbl.194 | 214 | 218 | 290 | 290 | 208 | 214 | 286 | 294 | 172 | 208 | 280 | 288 | 110 | 112 |
| 98rbl.196 | 216 | 224 | 292 | 292 | 208 | 214 | 284 | 298 | 170 | 176 | 268 | 288 | 110 | 110 |
| 98rbl.197 | 222 | 230 | 280 | 288 | 214 | 222 | 256 | 308 | 150 | 176 | 284 | 284 | 110 | 110 |
| 98rbl.205 | 224 | 224 | 282 | 288 | 208 | 214 | 266 | 290 | 198 | 208 | 280 | 290 | 110 | 110 |
| 98rbl.207 | 226 | 232 | 282 | 294 | 212 | 222 | 282 | 290 | 168 | 188 | 272 | 290 | 110 | 110 |
| 98rbl.215 | 222 | 224 | 282 | 292 | 202 | 208 | 292 | 302 | 192 | 202 | 262 | 284 | 110 | 114 |
| 98rbl.218 | 212 | 214 | 282 | 292 | 208 | 214 | 290 | 294 | 202 | 202 | 284 | 284 | 110 | 112 |
| 98rbl.219 | 224 | 252 | 288 | 288 | 216 | 222 | 272 | 274 | 168 | 208 | 288 | 288 | 110 | 110 |
| 98rbl.221 | 222 | 226 | 282 | 288 | 210 | 210 | 286 | 302 | 170 | 202 | 280 | 286 | 110 | 110 |
| 98rbl.224 | 214 | 216 | 290 | 290 | 214 | 214 | 272 | 288 | 162 | 204 | 274 | 302 | 110 | 110 |
| 98rbl.228 | 224 | 226 | 282 | 288 | 210 | 214 | 274 | 292 | 172 | 188 | 288 | 290 | 110 | 112 |
| 98rbl.233 | 222 | 226 | 282 | 290 | 218 | 222 | 274 | 286 | 150 | 166 | 274 | 286 | 110 | 110 |
| 98rbl.235 | 222 | 222 | 282 | 288 | 204 | 208 | 300 | 308 | 174 | 204 | 286 | 298 | 110 | 110 |
| 98rbl.244 | 214 | 218 | 290 | 290 | 204 | 214 | 290 | 312 | 166 | 224 | 284 | 290 | 110 | 110 |
| 98rbl.245 | 222 | 224 | 282 | 290 | 214 | 216 | 260 | 272 | 198 | 202 | 286 | 288 | 110 | 110 |
| 98rbl.249 | 214 | 228 | 286 | 290 | 218 | 220 | 300 | 310 | 204 | 204 | 268 | 296 | 110 | 110 |



|           |     |     |     |     |     |     |     |     |     |     |     |     |     |     |
|-----------|-----|-----|-----|-----|-----|-----|-----|-----|-----|-----|-----|-----|-----|-----|
| 98rbl.252 | 222 | 226 | 282 | 286 | 212 | 218 | 266 | 298 | 216 | 222 | 286 | 296 | 110 | 112 |
| 98rbl.254 | 214 | 220 | 282 | 290 | 218 | 226 | 286 | 286 | 210 | 210 | 266 | 278 | 112 | 112 |
| 98rbl.261 | 212 | 252 | 286 | 290 | 212 | 214 | 286 | 294 | 170 | 202 | 288 | 292 | 110 | 110 |
| 98rbl.267 | 218 | 224 | 282 | 282 | 206 | 208 | 292 | 298 | 170 | 176 | 286 | 286 | 110 | 110 |
| 98rbl.271 | 214 | 226 | 286 | 290 | 208 | 218 | 274 | 290 | 0   | 0   | 280 | 290 | 110 | 114 |
| 98rbl.274 | 222 | 228 | 282 | 286 | 210 | 216 | 282 | 290 | 170 | 178 | 288 | 290 | 110 | 112 |
| 98rbl.276 | 214 | 224 | 286 | 290 | 210 | 212 | 282 | 290 | 194 | 208 | 288 | 288 | 110 | 112 |
| 98rbl.282 | 222 | 224 | 282 | 282 | 206 | 214 | 300 | 304 | 180 | 190 | 280 | 284 | 110 | 112 |
| 98rbl.286 | 222 | 224 | 282 | 282 | 204 | 230 | 290 | 304 | 150 | 192 | 270 | 282 | 110 | 112 |
| 98rbl.289 | 214 | 214 | 290 | 290 | 214 | 216 | 294 | 304 | 168 | 206 | 266 | 290 | 110 | 110 |
| 98rbl.293 | 214 | 224 | 290 | 290 | 214 | 214 | 300 | 304 | 166 | 206 | 266 | 280 | 110 | 110 |
| 98rbl.298 | 226 | 234 | 284 | 284 | 204 | 208 | 274 | 284 | 202 | 214 | 284 | 288 | 110 | 110 |
| 98rbl.302 | 222 | 232 | 282 | 282 | 208 | 218 | 272 | 280 | 150 | 174 | 280 | 290 | 110 | 110 |
| 98rbl.309 | 214 | 214 | 286 | 288 | 210 | 216 | 290 | 308 | 176 | 222 | 288 | 288 | 110 | 110 |
| 98rbl.310 | 214 | 226 | 284 | 286 | 206 | 214 | 276 | 282 | 162 | 198 | 282 | 290 | 110 | 110 |
| 98rbl.311 | 214 | 230 | 284 | 286 | 206 | 214 | 0   | 0   | 170 | 170 | 280 | 284 | 110 | 110 |
| 98rbl.323 | 214 | 224 | 290 | 290 | 210 | 216 | 280 | 312 | 150 | 150 | 276 | 278 | 110 | 116 |
| 98rbl.326 | 224 | 228 | 288 | 290 | 214 | 216 | 282 | 284 | 190 | 204 | 286 | 302 | 110 | 112 |
| 98rbl.327 | 222 | 226 | 284 | 286 | 212 | 222 | 270 | 276 | 176 | 196 | 284 | 298 | 110 | 112 |
| 98rbl.335 | 226 | 236 | 282 | 290 | 210 | 218 | 274 | 290 | 190 | 222 | 296 | 296 | 110 | 112 |
| 98rbl.342 | 228 | 236 | 286 | 288 | 212 | 214 | 284 | 290 | 168 | 192 | 286 | 286 | 110 | 112 |
| 98rbl.346 | 214 | 218 | 286 | 288 | 218 | 222 | 298 | 310 | 0   | 0   | 268 | 296 | 110 | 110 |
| 98rbl.357 | 224 | 228 | 282 | 290 | 212 | 218 | 264 | 282 | 172 | 174 | 284 | 290 | 110 | 110 |
| 98rbl.361 | 212 | 220 | 290 | 292 | 214 | 218 | 270 | 294 | 192 | 194 | 272 | 290 | 110 | 110 |
| 98rbl.363 | 224 | 246 | 286 | 286 | 214 | 214 | 264 | 268 | 172 | 196 | 268 | 290 | 110 | 112 |
| 98rbl.369 | 224 | 248 | 282 | 290 | 214 | 214 | 272 | 298 | 198 | 198 | 288 | 292 | 110 | 110 |
| 98rbl.372 | 212 | 226 | 282 | 290 | 204 | 216 | 272 | 280 | 170 | 174 | 272 | 300 | 110 | 112 |
| 98rbl.374 | 222 | 236 | 282 | 290 | 210 | 230 | 264 | 282 | 170 | 172 | 288 | 288 | 110 | 110 |
| 98rbl.375 | 212 | 214 | 282 | 288 | 214 | 214 | 286 | 288 | 190 | 214 | 290 | 292 | 110 | 112 |
| 98rbl.380 | 222 | 224 | 282 | 290 | 204 | 218 | 294 | 296 | 170 | 214 | 262 | 286 | 110 | 110 |
| 98rbl.388 | 222 | 224 | 282 | 290 | 214 | 214 | 272 | 286 | 190 | 190 | 288 | 298 | 110 | 112 |
| 98rbl.391 | 214 | 224 | 284 | 288 | 204 | 214 | 280 | 302 | 172 | 182 | 272 | 290 | 110 | 114 |
| 98rbl.392 | 222 | 250 | 282 | 286 | 210 | 212 | 282 | 292 | 168 | 202 | 280 | 296 | 110 | 112 |
| 98rbl.393 | 224 | 248 | 286 | 290 | 210 | 214 | 272 | 272 | 200 | 210 | 280 | 298 | 110 | 110 |
| 98rbl.395 | 232 | 232 | 282 | 282 | 210 | 214 | 286 | 296 | 192 | 200 | 266 | 292 | 110 | 112 |
| 98rbl.396 | 224 | 226 | 282 | 286 | 210 | 218 | 262 | 298 | 166 | 182 | 284 | 286 | 110 | 112 |
| 98rbl.397 | 226 | 232 | 282 | 290 | 216 | 220 | 296 | 298 | 188 | 188 | 284 | 294 | 110 | 110 |

|           |     |     |     |     |     |     |     |     |     |     |     |     |     |     |
|-----------|-----|-----|-----|-----|-----|-----|-----|-----|-----|-----|-----|-----|-----|-----|
| 98rbl.400 | 214 | 218 | 282 | 286 | 204 | 214 | 286 | 296 | 182 | 200 | 284 | 292 | 110 | 112 |
| 98rbl.402 | 222 | 236 | 282 | 290 | 218 | 218 | 300 | 300 | 222 | 222 | 284 | 288 | 110 | 110 |
| 98rbl.403 | 214 | 222 | 282 | 290 | 214 | 214 | 272 | 298 | 168 | 212 | 274 | 282 | 110 | 110 |
| 98rbl.408 | 224 | 226 | 282 | 282 | 210 | 214 | 258 | 292 | 212 | 212 | 272 | 278 | 110 | 110 |
| 98rbl.410 | 222 | 224 | 282 | 290 | 216 | 218 | 284 | 292 | 190 | 216 | 276 | 284 | 110 | 110 |
| 98rbl.417 | 218 | 224 | 284 | 290 | 212 | 214 | 270 | 290 | 170 | 174 | 292 | 304 | 110 | 110 |
| 98rbl.420 | 214 | 214 | 282 | 292 | 210 | 210 | 268 | 282 | 150 | 188 | 276 | 282 | 110 | 110 |
| 98rbl.428 | 212 | 218 | 284 | 286 | 212 | 214 | 292 | 292 | 170 | 188 | 282 | 300 | 110 | 110 |
| 98rbl.431 | 224 | 226 | 282 | 282 | 218 | 222 | 286 | 296 | 184 | 210 | 282 | 282 | 110 | 112 |
| 98rbl.434 | 226 | 226 | 284 | 290 | 208 | 218 | 274 | 284 | 216 | 218 | 276 | 296 | 110 | 110 |
| 98rbl.437 | 218 | 226 | 282 | 286 | 212 | 212 | 290 | 300 | 172 | 208 | 274 | 304 | 110 | 112 |
| 98rbl.439 | 224 | 224 | 282 | 286 | 214 | 214 | 272 | 298 | 210 | 210 | 278 | 296 | 110 | 110 |
| 98rbl.440 | 224 | 230 | 284 | 290 | 204 | 212 | 274 | 280 | 178 | 194 | 280 | 298 | 110 | 110 |
| 98rbl.456 | 222 | 224 | 282 | 286 | 204 | 214 | 264 | 266 | 150 | 196 | 286 | 290 | 110 | 110 |
| 98rbl.458 | 214 | 232 | 282 | 286 | 208 | 214 | 272 | 272 | 206 | 206 | 286 | 286 | 110 | 110 |
| 98rbl.464 | 224 | 224 | 282 | 284 | 208 | 218 | 280 | 282 | 166 | 170 | 284 | 294 | 110 | 110 |
| 98rbl.474 | 222 | 224 | 284 | 286 | 206 | 210 | 272 | 288 | 170 | 170 | 288 | 288 | 110 | 112 |
| 98rbl.477 | 224 | 224 | 286 | 290 | 210 | 212 | 292 | 300 | 210 | 212 | 268 | 280 | 110 | 110 |
| 98rbl.488 | 224 | 228 | 282 | 290 | 214 | 214 | 260 | 268 | 192 | 216 | 288 | 290 | 110 | 110 |
| 99rbl.005 | 212 | 232 | 282 | 286 | 210 | 218 | 266 | 300 | 170 | 170 | 262 | 288 | 110 | 110 |
| 99rbl.007 | 228 | 228 | 282 | 290 | 204 | 212 | 248 | 292 | 194 | 194 | 280 | 284 | 110 | 110 |
| 99rbl.008 | 226 | 226 | 282 | 288 | 210 | 218 | 280 | 288 | 170 | 202 | 274 | 288 | 110 | 110 |
| 99rbl.012 | 214 | 232 | 282 | 284 | 216 | 236 | 256 | 270 | 170 | 204 | 286 | 294 | 110 | 110 |
| 99rbl.019 | 212 | 224 | 286 | 290 | 212 | 222 | 302 | 302 | 200 | 204 | 288 | 298 | 110 | 110 |
| 99rbl.023 | 214 | 222 | 286 | 286 | 214 | 236 | 278 | 292 | 196 | 196 | 274 | 294 | 110 | 110 |
| 99rbl.025 | 226 | 226 | 284 | 290 | 216 | 220 | 268 | 286 | 174 | 174 | 282 | 298 | 110 | 110 |
| 99rbl.026 | 218 | 224 | 282 | 286 | 216 | 218 | 254 | 292 | 196 | 208 | 290 | 294 | 110 | 110 |
| 99rbl.027 | 218 | 244 | 290 | 290 | 218 | 218 | 252 | 300 | 208 | 230 | 280 | 288 | 110 | 110 |
| 99rbl.029 | 222 | 232 | 284 | 286 | 210 | 212 | 270 | 280 | 170 | 198 | 274 | 284 | 110 | 110 |
| 99rbl.031 | 218 | 224 | 284 | 286 | 218 | 222 | 280 | 312 | 166 | 172 | 272 | 296 | 110 | 110 |
| 99rbl.034 | 232 | 238 | 286 | 286 | 204 | 212 | 296 | 302 | 188 | 192 | 276 | 288 | 110 | 112 |
| 99rbl.036 | 214 | 224 | 290 | 290 | 208 | 218 | 256 | 292 | 192 | 216 | 270 | 276 | 110 | 110 |
| 99rbl.037 | 228 | 232 | 282 | 290 | 214 | 218 | 300 | 304 | 170 | 196 | 292 | 304 | 110 | 110 |
| 99rbl.041 | 222 | 226 | 282 | 286 | 208 | 236 | 272 | 306 | 176 | 196 | 294 | 294 | 110 | 110 |
| 99rbl.044 | 222 | 226 | 284 | 284 | 208 | 236 | 272 | 292 | 170 | 176 | 288 | 296 | 110 | 110 |
| 99rbl.046 | 214 | 224 | 286 | 290 | 208 | 236 | 252 | 256 | 192 | 196 | 276 | 288 | 110 | 110 |
| 99rbl.050 | 212 | 254 | 282 | 290 | 204 | 218 | 264 | 286 | 196 | 200 | 278 | 280 | 110 | 110 |

|           |     |     |     |     |     |     |     |     |     |     |     |     |     |     |
|-----------|-----|-----|-----|-----|-----|-----|-----|-----|-----|-----|-----|-----|-----|-----|
| 99rbl.051 | 216 | 226 | 284 | 290 | 214 | 218 | 290 | 296 | 174 | 176 | 266 | 290 | 110 | 112 |
| 99rbl.053 | 212 | 224 | 282 | 290 | 214 | 218 | 266 | 292 | 196 | 196 | 270 | 270 | 110 | 110 |
| 99rbl.054 | 214 | 222 | 286 | 290 | 208 | 236 | 252 | 256 | 192 | 216 | 270 | 276 | 110 | 110 |
| 99rbl.058 | 220 | 228 | 288 | 288 | 216 | 218 | 286 | 298 | 192 | 206 | 284 | 286 | 110 | 110 |
| 99rbl.060 | 224 | 224 | 286 | 290 | 216 | 216 | 286 | 296 | 176 | 190 | 262 | 274 | 110 | 110 |
| 99rbl.063 | 214 | 218 | 282 | 288 | 214 | 214 | 270 | 296 | 190 | 190 | 266 | 266 | 110 | 114 |
| 99rbl.066 | 222 | 222 | 282 | 286 | 208 | 226 | 254 | 286 | 150 | 150 | 272 | 288 | 112 | 114 |
| 99rbl.067 | 226 | 230 | 282 | 282 | 210 | 214 | 270 | 298 | 190 | 190 | 284 | 302 | 110 | 114 |
| 99rbl.068 | 222 | 248 | 286 | 286 | 214 | 216 | 292 | 318 | 170 | 170 | 272 | 284 | 110 | 112 |
| 99rbl.069 | 212 | 224 | 284 | 286 | 214 | 222 | 290 | 292 | 208 | 208 | 282 | 288 | 110 | 112 |
| 99rbl.072 | 212 | 220 | 282 | 282 | 212 | 216 | 292 | 296 | 170 | 214 | 286 | 298 | 110 | 110 |
| 99rbl.075 | 224 | 224 | 282 | 286 | 214 | 218 | 284 | 284 | 188 | 192 | 294 | 298 | 110 | 110 |
| 99rbl.076 | 214 | 214 | 282 | 290 | 214 | 214 | 282 | 282 | 194 | 202 | 282 | 282 | 110 | 110 |
| 99rbl.077 | 222 | 224 | 286 | 292 | 204 | 214 | 254 | 306 | 172 | 192 | 284 | 300 | 110 | 110 |
| 99rbl.078 | 222 | 236 | 280 | 286 | 208 | 212 | 260 | 276 | 170 | 202 | 284 | 288 | 110 | 110 |
| 99rbl.079 | 218 | 224 | 284 | 288 | 214 | 220 | 272 | 294 | 172 | 178 | 274 | 288 | 110 | 110 |
| 99rbl.083 | 224 | 228 | 282 | 282 | 208 | 218 | 290 | 290 | 168 | 168 | 288 | 288 | 112 | 112 |
| 99rbl.084 | 224 | 228 | 290 | 292 | 210 | 214 | 272 | 296 | 200 | 222 | 262 | 292 | 110 | 112 |
| 99rbl.088 | 224 | 226 | 282 | 290 | 212 | 222 | 294 | 310 | 150 | 184 | 274 | 288 | 112 | 114 |
| 99rbl.089 | 214 | 238 | 282 | 282 | 202 | 208 | 252 | 294 | 168 | 198 | 280 | 300 | 110 | 110 |
| 99rbl.090 | 214 | 232 | 286 | 290 | 222 | 232 | 272 | 296 | 170 | 192 | 274 | 292 | 110 | 110 |
| 99rbl.092 | 214 | 224 | 282 | 290 | 212 | 222 | 296 | 298 | 196 | 196 | 288 | 288 | 110 | 110 |
| 99rbl.098 | 214 | 228 | 286 | 286 | 222 | 222 | 268 | 294 | 150 | 168 | 288 | 288 | 110 | 112 |
| 99rbl.099 | 214 | 228 | 282 | 290 | 208 | 214 | 290 | 298 | 168 | 170 | 268 | 280 | 112 | 112 |
| 99rbl.104 | 224 | 236 | 284 | 290 | 212 | 214 | 262 | 268 | 168 | 168 | 288 | 296 | 110 | 112 |
| 99rbl.111 | 222 | 224 | 288 | 288 | 214 | 218 | 264 | 286 | 190 | 196 | 286 | 294 | 110 | 110 |
| 99rbl.112 | 232 | 248 | 282 | 286 | 202 | 214 | 246 | 270 | 170 | 170 | 270 | 298 | 110 | 110 |
| 99rbl.115 | 212 | 226 | 290 | 290 | 216 | 232 | 286 | 296 | 166 | 192 | 280 | 286 | 110 | 110 |
| 99rbl.119 | 226 | 248 | 282 | 284 | 210 | 222 | 286 | 304 | 188 | 206 | 270 | 282 | 112 | 114 |
| 99rbl.120 | 212 | 222 | 290 | 290 | 216 | 216 | 254 | 286 | 166 | 172 | 268 | 288 | 110 | 112 |
| 99rbl.123 | 224 | 232 | 284 | 302 | 214 | 216 | 298 | 304 | 168 | 170 | 284 | 284 | 110 | 110 |
| 99rbl.126 | 224 | 244 | 282 | 290 | 216 | 218 | 282 | 284 | 166 | 200 | 290 | 300 | 112 | 112 |
| 99rbl.127 | 218 | 224 | 290 | 290 | 210 | 218 | 284 | 292 | 150 | 166 | 270 | 286 | 110 | 110 |
| 99rbl.128 | 218 | 248 | 286 | 292 | 214 | 216 | 288 | 304 | 172 | 178 | 268 | 302 | 110 | 112 |
| 99rbl.129 | 214 | 222 | 286 | 286 | 216 | 236 | 292 | 304 | 192 | 196 | 284 | 298 | 110 | 110 |
| 99rbl.130 | 214 | 222 | 290 | 290 | 214 | 236 | 252 | 292 | 150 | 196 | 272 | 286 | 110 | 110 |
| 99rbl.131 | 254 | 254 | 282 | 288 | 214 | 214 | 270 | 296 | 212 | 216 | 266 | 278 | 110 | 110 |

|           |     |     |     |     |     |     |     |     |     |     |     |     |     |     |
|-----------|-----|-----|-----|-----|-----|-----|-----|-----|-----|-----|-----|-----|-----|-----|
| 99rbl.133 | 224 | 248 | 282 | 282 | 216 | 216 | 286 | 286 | 168 | 172 | 268 | 286 | 110 | 110 |
| 99rbl.135 | 212 | 212 | 282 | 290 | 216 | 216 | 290 | 292 | 174 | 178 | 274 | 274 | 110 | 110 |
| 99rbl.136 | 224 | 232 | 284 | 284 | 212 | 214 | 286 | 290 | 174 | 182 | 276 | 276 | 110 | 112 |
| 99rbl.137 | 212 | 212 | 280 | 286 | 212 | 214 | 274 | 300 | 216 | 216 | 284 | 286 | 110 | 110 |
| 99rbl.138 | 226 | 236 | 282 | 290 | 216 | 216 | 290 | 292 | 192 | 200 | 268 | 296 | 110 | 114 |
| 99rbl.140 | 214 | 226 | 282 | 288 | 212 | 218 | 264 | 290 | 168 | 170 | 294 | 294 | 110 | 112 |
| 99rbl.147 | 214 | 230 | 292 | 292 | 210 | 218 | 270 | 278 | 172 | 216 | 272 | 288 | 110 | 110 |
| 99rbl.149 | 214 | 232 | 282 | 288 | 204 | 218 | 290 | 292 | 172 | 172 | 292 | 300 | 110 | 112 |
| 99rbl.150 | 214 | 250 | 282 | 290 | 214 | 214 | 254 | 272 | 168 | 214 | 278 | 284 | 110 | 110 |
| 99rbl.156 | 224 | 226 | 282 | 282 | 210 | 214 | 266 | 272 | 150 | 174 | 300 | 306 | 110 | 110 |
| 99rbl.157 | 226 | 226 | 282 | 292 | 212 | 216 | 270 | 280 | 194 | 208 | 284 | 300 | 110 | 112 |
| 99rbl.158 | 228 | 250 | 290 | 292 | 214 | 214 | 284 | 294 | 170 | 170 | 270 | 270 | 110 | 110 |
| 99rbl.164 | 214 | 214 | 282 | 288 | 218 | 218 | 268 | 292 | 168 | 206 | 284 | 290 | 110 | 110 |
| 99rbl.166 | 224 | 232 | 282 | 290 | 204 | 210 | 252 | 282 | 150 | 182 | 274 | 296 | 110 | 112 |
| 99rbl.167 | 224 | 232 | 284 | 292 | 216 | 218 | 270 | 308 | 170 | 192 | 276 | 288 | 110 | 110 |
| 99rbl.168 | 224 | 224 | 286 | 290 | 222 | 224 | 288 | 292 | 150 | 170 | 278 | 292 | 110 | 110 |
| 99rbl.170 | 218 | 232 | 288 | 292 | 216 | 232 | 286 | 286 | 168 | 168 | 288 | 288 | 110 | 110 |
| 99rbl.172 | 224 | 230 | 282 | 294 | 216 | 220 | 280 | 290 | 178 | 192 | 286 | 302 | 110 | 110 |
| 99rbl.174 | 216 | 228 | 282 | 282 | 220 | 230 | 282 | 282 | 192 | 192 | 282 | 288 | 110 | 110 |
| 99rbl.177 | 226 | 228 | 282 | 282 | 210 | 214 | 256 | 286 | 166 | 168 | 268 | 284 | 110 | 114 |
| 99rbl.180 | 224 | 224 | 280 | 282 | 216 | 216 | 296 | 300 | 168 | 202 | 286 | 302 | 110 | 110 |
| 99rbl.182 | 212 | 226 | 286 | 288 | 208 | 218 | 302 | 310 | 170 | 194 | 266 | 290 | 110 | 110 |
| 99rbl.190 | 220 | 220 | 286 | 292 | 210 | 218 | 280 | 304 | 166 | 200 | 274 | 274 | 110 | 110 |
| 99rbl.191 | 226 | 234 | 288 | 292 | 202 | 216 | 274 | 290 | 162 | 176 | 290 | 296 | 110 | 110 |
| 99rbl.194 | 224 | 224 | 286 | 292 | 210 | 212 | 256 | 282 | 168 | 204 | 276 | 302 | 110 | 110 |
| 99rbl.195 | 218 | 232 | 282 | 286 | 212 | 216 | 290 | 294 | 176 | 204 | 278 | 296 | 110 | 110 |
| 99rbl.196 | 220 | 224 | 286 | 292 | 214 | 236 | 272 | 308 | 182 | 222 | 274 | 282 | 110 | 112 |
| 99rbl.207 | 238 | 238 | 282 | 286 | 202 | 214 | 254 | 284 | 196 | 204 | 276 | 278 | 110 | 110 |
| 99rbl.208 | 218 | 218 | 280 | 288 | 216 | 222 | 268 | 288 | 170 | 190 | 274 | 280 | 110 | 110 |
| 99rbl.209 | 214 | 224 | 282 | 290 | 214 | 230 | 290 | 298 | 192 | 202 | 288 | 296 | 110 | 112 |
| 99rbl.215 | 224 | 226 | 282 | 282 | 218 | 222 | 284 | 290 | 168 | 192 | 284 | 288 | 110 | 110 |
| 99rbl.219 | 218 | 228 | 286 | 288 | 210 | 214 | 286 | 308 | 192 | 194 | 278 | 280 | 110 | 112 |
| 99rbl.220 | 224 | 224 | 282 | 288 | 208 | 210 | 290 | 290 | 170 | 192 | 274 | 286 | 110 | 110 |
| 99rbl.222 | 212 | 228 | 282 | 286 | 216 | 220 | 286 | 308 | 170 | 196 | 276 | 294 | 110 | 110 |
| 99rbl.223 | 222 | 232 | 284 | 290 | 212 | 214 | 272 | 298 | 172 | 188 | 294 | 296 | 110 | 112 |
| 99rbl.224 | 212 | 226 | 286 | 286 | 214 | 234 | 276 | 304 | 170 | 170 | 274 | 284 | 110 | 114 |
| 99rbl.225 | 214 | 224 | 282 | 292 | 210 | 210 | 286 | 302 | 178 | 186 | 274 | 274 | 110 | 114 |

|           |     |     |     |     |     |     |     |     |     |     |     |     |     |     |
|-----------|-----|-----|-----|-----|-----|-----|-----|-----|-----|-----|-----|-----|-----|-----|
| 99rbl.227 | 224 | 232 | 292 | 292 | 214 | 218 | 274 | 274 | 168 | 170 | 272 | 276 | 110 | 110 |
| 99rbl.229 | 214 | 224 | 282 | 282 | 214 | 230 | 258 | 280 | 168 | 168 | 264 | 278 | 110 | 110 |
| 99rbl.230 | 224 | 228 | 284 | 286 | 204 | 218 | 270 | 304 | 178 | 184 | 282 | 292 | 110 | 112 |
| 99rbl.231 | 226 | 252 | 282 | 286 | 212 | 218 | 278 | 282 | 186 | 202 | 272 | 282 | 110 | 110 |
| 99rbl.233 | 214 | 226 | 286 | 288 | 216 | 222 | 270 | 270 | 172 | 186 | 284 | 298 | 112 | 114 |
| 99rbl.234 | 232 | 232 | 282 | 282 | 208 | 212 | 278 | 284 | 170 | 182 | 284 | 292 | 110 | 110 |
| 99rbl.239 | 224 | 232 | 290 | 292 | 214 | 214 | 272 | 292 | 150 | 168 | 266 | 298 | 110 | 110 |
| 99rbl.242 | 214 | 254 | 286 | 290 | 214 | 218 | 250 | 288 | 168 | 194 | 274 | 292 | 110 | 112 |
| 99rbl.243 | 222 | 224 | 286 | 292 | 208 | 216 | 278 | 308 | 202 | 210 | 294 | 310 | 110 | 112 |
| 99rbl.246 | 212 | 228 | 282 | 290 | 210 | 218 | 286 | 288 | 166 | 170 | 294 | 298 | 110 | 110 |
| 99rbl.248 | 212 | 214 | 282 | 282 | 208 | 214 | 268 | 268 | 170 | 172 | 274 | 282 | 110 | 110 |
| 99rbl.249 | 224 | 224 | 282 | 290 | 208 | 222 | 282 | 290 | 202 | 202 | 288 | 290 | 110 | 110 |
| 99rbl.256 | 212 | 214 | 282 | 282 | 208 | 216 | 256 | 290 | 168 | 168 | 282 | 300 | 110 | 110 |
| 99rbl.258 | 218 | 222 | 290 | 292 | 204 | 236 | 284 | 290 | 196 | 216 | 286 | 290 | 110 | 110 |
| 99rbl.259 | 224 | 226 | 282 | 282 | 222 | 230 | 266 | 272 | 214 | 216 | 280 | 284 | 110 | 110 |
| 99rbl.263 | 214 | 248 | 282 | 284 | 214 | 218 | 284 | 300 | 172 | 172 | 262 | 298 | 110 | 110 |
| 99rbl.267 | 218 | 222 | 282 | 290 | 214 | 218 | 296 | 298 | 168 | 172 | 288 | 298 | 110 | 110 |
| 99rbl.268 | 218 | 224 | 282 | 290 | 212 | 218 | 286 | 304 | 170 | 174 | 288 | 288 | 110 | 110 |
| 99rbl.274 | 222 | 222 | 282 | 282 | 216 | 216 | 260 | 284 | 172 | 216 | 288 | 288 | 110 | 112 |
| 99rbl.278 | 214 | 216 | 282 | 282 | 214 | 218 | 292 | 298 | 150 | 150 | 282 | 298 | 110 | 112 |
| 99rbl.281 | 224 | 240 | 284 | 292 | 214 | 222 | 300 | 322 | 188 | 192 | 280 | 284 | 112 | 112 |
| 99rbl.287 | 224 | 238 | 286 | 290 | 220 | 220 | 290 | 298 | 188 | 204 | 0   | 0   | 110 | 112 |
| 99rbl.289 | 214 | 230 | 280 | 288 | 216 | 218 | 282 | 306 | 170 | 170 | 280 | 290 | 110 | 112 |
| 99rbl.290 | 224 | 224 | 282 | 286 | 218 | 222 | 264 | 286 | 168 | 184 | 290 | 292 | 110 | 112 |
| 99rbl.292 | 224 | 238 | 286 | 290 | 218 | 236 | 290 | 310 | 206 | 216 | 272 | 278 | 110 | 110 |
| 99rbl.294 | 214 | 224 | 282 | 290 | 202 | 214 | 282 | 288 | 166 | 174 | 278 | 288 | 110 | 110 |
| 99rbl.295 | 214 | 214 | 282 | 284 | 214 | 214 | 254 | 254 | 170 | 170 | 278 | 284 | 110 | 112 |
| 99rbl.298 | 232 | 232 | 282 | 290 | 216 | 218 | 292 | 310 | 150 | 168 | 284 | 284 | 110 | 110 |
| 00rbl.001 | 224 | 228 | 290 | 292 | 214 | 222 | 284 | 298 | 194 | 194 | 274 | 288 | 110 | 112 |
| 00rbl.002 | 216 | 232 | 282 | 292 | 216 | 218 | 272 | 288 | 192 | 192 | 284 | 290 | 110 | 110 |
| 00rbl.005 | 224 | 232 | 282 | 288 | 214 | 218 | 270 | 270 | 192 | 210 | 286 | 292 | 110 | 114 |
| 00rbl.006 | 226 | 226 | 282 | 286 | 214 | 218 | 280 | 288 | 184 | 220 | 288 | 292 | 110 | 110 |
| 00rbl.007 | 222 | 228 | 284 | 286 | 218 | 218 | 264 | 268 | 204 | 210 | 274 | 284 | 110 | 110 |
| 00rbl.009 | 224 | 232 | 282 | 286 | 208 | 210 | 282 | 282 | 200 | 210 | 274 | 286 | 110 | 110 |
| 00rbl.010 | 218 | 218 | 286 | 294 | 214 | 222 | 286 | 286 | 178 | 192 | 274 | 280 | 110 | 112 |
| 00rbl.011 | 224 | 224 | 286 | 294 | 214 | 214 | 278 | 298 | 170 | 222 | 288 | 292 | 110 | 110 |
| 00rbl.012 | 226 | 228 | 284 | 290 | 214 | 218 | 268 | 292 | 178 | 196 | 282 | 290 | 110 | 110 |

|           |     |     |     |     |     |     |     |     |     |     |     |     |     |     |
|-----------|-----|-----|-----|-----|-----|-----|-----|-----|-----|-----|-----|-----|-----|-----|
| 00rbl.016 | 224 | 254 | 290 | 292 | 216 | 218 | 274 | 274 | 170 | 194 | 276 | 302 | 110 | 112 |
| 00rbl.022 | 228 | 254 | 284 | 290 | 214 | 214 | 272 | 290 | 150 | 170 | 266 | 272 | 110 | 110 |
| 00rbl.023 | 212 | 254 | 282 | 290 | 202 | 214 | 284 | 284 | 168 | 168 | 284 | 302 | 110 | 112 |
| 00rbl.025 | 226 | 230 | 284 | 284 | 228 | 228 | 284 | 298 | 170 | 170 | 278 | 284 | 110 | 110 |
| 00rbl.028 | 230 | 232 | 284 | 288 | 214 | 214 | 298 | 298 | 168 | 170 | 266 | 288 | 110 | 110 |
| 00rbl.040 | 228 | 232 | 284 | 292 | 214 | 218 | 0   | 0   | 150 | 168 | 266 | 286 | 110 | 110 |
| 00rbl.043 | 228 | 238 | 284 | 292 | 214 | 218 | 256 | 266 | 192 | 192 | 270 | 294 | 110 | 110 |
| 00rbl.048 | 224 | 228 | 290 | 290 | 212 | 216 | 256 | 302 | 198 | 218 | 270 | 294 | 110 | 110 |
| 00rbl.064 | 224 | 224 | 282 | 286 | 208 | 214 | 262 | 292 | 172 | 192 | 280 | 286 | 112 | 112 |
| 00rbl.065 | 222 | 250 | 286 | 286 | 214 | 218 | 294 | 296 | 190 | 198 | 270 | 288 | 110 | 112 |
| 00rbl.066 | 224 | 224 | 280 | 282 | 212 | 212 | 250 | 296 | 168 | 186 | 270 | 274 | 110 | 110 |
| 00rbl.069 | 218 | 222 | 280 | 282 | 218 | 224 | 292 | 302 | 170 | 170 | 284 | 292 | 110 | 110 |
| 00rbl.070 | 224 | 224 | 282 | 286 | 214 | 214 | 286 | 294 | 178 | 190 | 292 | 304 | 110 | 110 |
| 00rbl.073 | 224 | 224 | 282 | 288 | 214 | 218 | 262 | 280 | 194 | 216 | 276 | 280 | 110 | 114 |
| 00rbl.075 | 212 | 218 | 290 | 290 | 212 | 214 | 296 | 296 | 162 | 196 | 266 | 282 | 110 | 110 |
| 00rbl.077 | 218 | 218 | 282 | 282 | 212 | 222 | 272 | 284 | 174 | 186 | 282 | 304 | 110 | 110 |
| 00rbl.082 | 224 | 230 | 280 | 282 | 212 | 212 | 302 | 302 | 170 | 176 | 286 | 288 | 110 | 110 |
| 00rbl.085 | 214 | 222 | 282 | 282 | 210 | 218 | 264 | 290 | 190 | 204 | 274 | 274 | 110 | 110 |
| 00rbl.089 | 226 | 226 | 284 | 284 | 212 | 220 | 284 | 308 | 170 | 200 | 266 | 284 | 110 | 112 |
| 00rbl.096 | 218 | 224 | 286 | 290 | 202 | 202 | 250 | 252 | 196 | 196 | 290 | 302 | 110 | 110 |
| 00rbl.097 | 224 | 226 | 284 | 288 | 214 | 218 | 288 | 296 | 166 | 204 | 280 | 280 | 110 | 110 |
| 00rbl.099 | 214 | 226 | 286 | 290 | 202 | 218 | 256 | 288 | 168 | 182 | 286 | 294 | 110 | 110 |
| 00rbl.104 | 226 | 232 | 284 | 286 | 214 | 218 | 280 | 308 | 196 | 202 | 268 | 296 | 110 | 110 |
| 00rbl.107 | 222 | 232 | 290 | 290 | 214 | 222 | 214 | 274 | 198 | 198 | 282 | 304 | 110 | 112 |
| 00rbl.108 | 216 | 224 | 282 | 290 | 216 | 220 | 264 | 312 | 160 | 170 | 266 | 298 | 110 | 112 |
| 00rbl.111 | 240 | 240 | 282 | 290 | 214 | 218 | 270 | 274 | 150 | 170 | 290 | 290 | 110 | 110 |
| 00rbl.118 | 216 | 232 | 282 | 290 | 214 | 218 | 250 | 272 | 198 | 202 | 276 | 280 | 110 | 110 |
| 00rbl.120 | 220 | 228 | 288 | 290 | 214 | 218 | 284 | 284 | 192 | 206 | 282 | 302 | 110 | 110 |
| 00rbl.122 | 224 | 228 | 282 | 282 | 222 | 222 | 220 | 300 | 194 | 226 | 268 | 276 | 110 | 110 |
| 00rbl.123 | 218 | 258 | 282 | 290 | 212 | 212 | 284 | 310 | 168 | 170 | 292 | 294 | 112 | 116 |
| 00rbl.124 | 218 | 232 | 282 | 290 | 214 | 214 | 214 | 274 | 198 | 198 | 272 | 280 | 110 | 112 |
| 00rbl.126 | 222 | 224 | 290 | 290 | 204 | 236 | 270 | 292 | 166 | 216 | 272 | 282 | 110 | 114 |
| 00rbl.135 | 224 | 252 | 288 | 294 | 214 | 214 | 286 | 300 | 182 | 182 | 274 | 286 | 110 | 110 |
| 00rbl.137 | 218 | 228 | 284 | 290 | 214 | 220 | 298 | 306 | 150 | 200 | 290 | 296 | 110 | 110 |
| 00rbl.154 | 216 | 258 | 284 | 286 | 214 | 228 | 286 | 292 | 172 | 224 | 298 | 304 | 110 | 110 |
| 00rbl.155 | 218 | 244 | 288 | 292 | 214 | 224 | 286 | 294 | 208 | 208 | 276 | 284 | 110 | 110 |
| 00rbl.158 | 226 | 226 | 284 | 292 | 214 | 222 | 254 | 294 | 170 | 182 | 274 | 284 | 110 | 110 |

|           |     |     |     |     |     |     |     |     |     |     |     |     |     |     |
|-----------|-----|-----|-----|-----|-----|-----|-----|-----|-----|-----|-----|-----|-----|-----|
| 00rbl.160 | 226 | 230 | 288 | 292 | 216 | 220 | 266 | 302 | 162 | 220 | 278 | 292 | 110 | 110 |
| 00rbl.163 | 226 | 226 | 286 | 292 | 214 | 218 | 256 | 302 | 180 | 180 | 276 | 308 | 110 | 110 |
| 00rbl.164 | 232 | 232 | 282 | 290 | 210 | 214 | 282 | 290 | 150 | 196 | 280 | 284 | 110 | 116 |
| 00rbl.169 | 214 | 226 | 282 | 288 | 202 | 208 | 258 | 286 | 150 | 150 | 282 | 296 | 110 | 110 |
| 00rbl.176 | 220 | 226 | 292 | 292 | 212 | 214 | 252 | 308 | 150 | 194 | 276 | 292 | 110 | 110 |
| 00rbl.178 | 226 | 232 | 282 | 290 | 208 | 216 | 272 | 304 | 168 | 212 | 294 | 298 | 110 | 110 |
| 00rbl.179 | 222 | 222 | 286 | 286 | 214 | 218 | 270 | 308 | 170 | 170 | 286 | 298 | 110 | 110 |
| 00rbl.180 | 224 | 224 | 282 | 288 | 208 | 214 | 292 | 308 | 168 | 202 | 274 | 284 | 110 | 112 |
| 00rbl.183 | 212 | 232 | 282 | 282 | 222 | 232 | 272 | 284 | 150 | 170 | 284 | 288 | 110 | 110 |
| 00rbl.186 | 216 | 224 | 292 | 292 | 214 | 214 | 278 | 286 | 194 | 194 | 276 | 286 | 110 | 110 |
| 00rbl.191 | 220 | 220 | 286 | 292 | 216 | 218 | 292 | 300 | 178 | 178 | 266 | 282 | 110 | 110 |
| 00rbl.194 | 218 | 238 | 290 | 292 | 212 | 218 | 264 | 286 | 168 | 196 | 270 | 288 | 110 | 110 |
| 00rbl.196 | 228 | 234 | 286 | 286 | 218 | 230 | 266 | 312 | 198 | 202 | 276 | 282 | 110 | 110 |
| 00rbl.198 | 224 | 228 | 282 | 290 | 210 | 220 | 272 | 290 | 174 | 196 | 288 | 294 | 110 | 110 |
| 00rbl.202 | 224 | 226 | 284 | 290 | 202 | 214 | 220 | 220 | 162 | 170 | 270 | 286 | 110 | 110 |
| 00rbl.203 | 226 | 228 | 286 | 286 | 212 | 214 | 276 | 300 | 166 | 166 | 266 | 266 | 110 | 110 |
| 00rbl.204 | 228 | 228 | 282 | 282 | 212 | 216 | 252 | 270 | 176 | 200 | 284 | 284 | 110 | 110 |
| 00rbl.206 | 220 | 232 | 286 | 292 | 212 | 218 | 288 | 300 | 188 | 210 | 302 | 310 | 110 | 112 |
| 00rbl.212 | 214 | 214 | 282 | 282 | 212 | 224 | 292 | 298 | 176 | 208 | 284 | 298 | 110 | 110 |
| 00rbl.217 | 224 | 226 | 282 | 284 | 214 | 218 | 290 | 290 | 166 | 170 | 262 | 290 | 110 | 110 |
| 00rbl.223 | 220 | 226 | 286 | 292 | 214 | 214 | 264 | 286 | 174 | 180 | 276 | 282 | 110 | 110 |
| 00rbl.225 | 0   | 0   | 288 | 290 | 214 | 218 | 268 | 276 | 170 | 202 | 274 | 280 | 110 | 110 |
| 00rbl.227 | 234 | 234 | 288 | 294 | 212 | 218 | 272 | 300 | 150 | 192 | 284 | 284 | 110 | 110 |
| 00rbl.228 | 214 | 232 | 282 | 288 | 212 | 214 | 284 | 300 | 184 | 216 | 266 | 276 | 110 | 110 |
| 00rbl.232 | 226 | 234 | 284 | 294 | 212 | 214 | 272 | 288 | 170 | 186 | 286 | 290 | 110 | 114 |
| 00rbl.236 | 222 | 224 | 288 | 294 | 212 | 222 | 300 | 310 | 182 | 198 | 286 | 300 | 110 | 110 |
| 00rbl.239 | 212 | 226 | 284 | 292 | 212 | 212 | 282 | 292 | 178 | 202 | 284 | 288 | 110 | 110 |
| 00rbl.240 | 224 | 252 | 290 | 292 | 212 | 218 | 258 | 312 | 150 | 170 | 274 | 286 | 110 | 114 |
| 00rbl.242 | 212 | 224 | 286 | 290 | 214 | 226 | 258 | 308 | 170 | 204 | 290 | 296 | 110 | 110 |
| 00rbl.244 | 214 | 228 | 286 | 292 | 212 | 212 | 294 | 310 | 170 | 174 | 276 | 278 | 110 | 114 |
| 00rbl.245 | 218 | 228 | 282 | 286 | 204 | 214 | 258 | 272 | 168 | 168 | 292 | 292 | 110 | 110 |
| 00rbl.249 | 222 | 232 | 292 | 294 | 212 | 222 | 300 | 308 | 180 | 198 | 294 | 302 | 110 | 110 |
| 00rbl.257 | 218 | 224 | 284 | 288 | 218 | 226 | 274 | 274 | 170 | 170 | 282 | 282 | 110 | 112 |
| 00rbl.258 | 224 | 224 | 282 | 284 | 216 | 220 | 300 | 300 | 198 | 202 | 276 | 292 | 110 | 112 |
| 00rbl.263 | 228 | 228 | 284 | 288 | 216 | 220 | 284 | 300 | 168 | 198 | 278 | 288 | 110 | 110 |
| 00rbl.267 | 230 | 232 | 282 | 286 | 218 | 222 | 256 | 282 | 150 | 208 | 268 | 270 | 110 | 110 |
| 00rbl.268 | 226 | 232 | 282 | 284 | 218 | 220 | 304 | 312 | 168 | 168 | 286 | 298 | 110 | 110 |

|           |     |     |     |     |     |     |     |     |     |     |     |     |     |     |
|-----------|-----|-----|-----|-----|-----|-----|-----|-----|-----|-----|-----|-----|-----|-----|
| 00rbl.271 | 216 | 218 | 286 | 290 | 214 | 214 | 272 | 290 | 172 | 214 | 276 | 286 | 110 | 110 |
| 00rbl.273 | 224 | 226 | 282 | 288 | 208 | 236 | 256 | 312 | 168 | 170 | 286 | 288 | 110 | 112 |
| 00rbl.277 | 232 | 232 | 282 | 286 | 214 | 222 | 270 | 288 | 172 | 200 | 274 | 282 | 110 | 110 |
| 00rbl.278 | 228 | 228 | 288 | 292 | 210 | 212 | 256 | 284 | 172 | 178 | 278 | 278 | 110 | 110 |
| 00rbl.282 | 228 | 228 | 284 | 290 | 214 | 218 | 254 | 272 | 150 | 204 | 286 | 294 | 110 | 112 |
| 00rbl.284 | 218 | 218 | 286 | 286 | 210 | 218 | 280 | 290 | 200 | 208 | 298 | 298 | 110 | 112 |
| 00rbl.288 | 222 | 244 | 282 | 284 | 214 | 218 | 264 | 298 | 150 | 150 | 286 | 290 | 110 | 110 |
| 00rbl.290 | 224 | 228 | 284 | 286 | 214 | 218 | 300 | 310 | 170 | 172 | 274 | 274 | 110 | 110 |
| 00rbl.294 | 222 | 222 | 282 | 290 | 214 | 218 | 282 | 304 | 202 | 206 | 276 | 290 | 110 | 112 |
| 00rbl.295 | 226 | 228 | 282 | 288 | 218 | 218 | 286 | 304 | 166 | 170 | 280 | 290 | 110 | 112 |
| 00rbl.299 | 214 | 228 | 282 | 286 | 222 | 232 | 266 | 298 | 208 | 208 | 276 | 284 | 110 | 114 |
| 00rbl.301 | 232 | 232 | 284 | 292 | 216 | 220 | 286 | 286 | 172 | 198 | 276 | 288 | 110 | 112 |
| 00rbl.302 | 224 | 256 | 286 | 286 | 204 | 212 | 290 | 300 | 196 | 204 | 284 | 302 | 110 | 110 |
| 00rbl.304 | 216 | 228 | 288 | 292 | 214 | 218 | 304 | 304 | 168 | 174 | 284 | 302 | 110 | 112 |
| 00rbl.306 | 224 | 230 | 284 | 290 | 204 | 212 | 0   | 0   | 168 | 174 | 268 | 276 | 110 | 110 |
| 00rbl.307 | 224 | 230 | 284 | 292 | 214 | 218 | 238 | 312 | 150 | 164 | 264 | 282 | 110 | 110 |
| 00rbl.309 | 226 | 228 | 288 | 292 | 212 | 218 | 278 | 278 | 150 | 216 | 276 | 290 | 110 | 110 |
| 00rbl.312 | 224 | 224 | 284 | 292 | 214 | 218 | 270 | 300 | 0   | 0   | 0   | 0   | 110 | 110 |
| 00rbl.320 | 216 | 224 | 284 | 292 | 210 | 218 | 280 | 280 | 150 | 150 | 268 | 282 | 110 | 112 |
| 00rbl.321 | 224 | 226 | 286 | 290 | 202 | 218 | 286 | 304 | 196 | 206 | 282 | 292 | 110 | 110 |
| 00rbl.324 | 232 | 238 | 288 | 292 | 216 | 218 | 246 | 290 | 172 | 182 | 270 | 294 | 110 | 110 |
| 00rbl.325 | 226 | 228 | 282 | 292 | 214 | 222 | 286 | 294 | 168 | 168 | 264 | 276 | 110 | 112 |
| 00rbl.326 | 224 | 228 | 282 | 290 | 212 | 218 | 284 | 298 | 168 | 168 | 262 | 290 | 110 | 110 |
| 00rbl.327 | 226 | 228 | 284 | 286 | 202 | 214 | 292 | 310 | 176 | 192 | 288 | 304 | 110 | 110 |
| 00rbl.328 | 226 | 228 | 284 | 292 | 214 | 222 | 286 | 294 | 150 | 168 | 264 | 278 | 112 | 112 |
| 00rbl.335 | 230 | 232 | 282 | 290 | 210 | 210 | 300 | 300 | 170 | 170 | 270 | 284 | 110 | 110 |
| 00rbl.336 | 226 | 228 | 284 | 286 | 204 | 212 | 290 | 310 | 150 | 192 | 264 | 290 | 110 | 110 |
| 00rbl.337 | 216 | 218 | 286 | 288 | 214 | 214 | 272 | 286 | 190 | 214 | 268 | 274 | 110 | 112 |
| 00rbl.344 | 218 | 238 | 284 | 290 | 220 | 224 | 274 | 294 | 168 | 194 | 266 | 290 | 110 | 110 |
| 00rbl.347 | 216 | 226 | 288 | 288 | 216 | 220 | 224 | 274 | 190 | 214 | 282 | 282 | 110 | 112 |
| 00rbl.351 | 216 | 224 | 290 | 292 | 214 | 218 | 290 | 296 | 150 | 166 | 288 | 288 | 110 | 110 |
| 00rbl.354 | 228 | 228 | 284 | 290 | 214 | 218 | 288 | 294 | 214 | 214 | 266 | 296 | 110 | 110 |
| 00rbl.355 | 224 | 226 | 288 | 290 | 214 | 218 | 300 | 300 | 200 | 200 | 274 | 286 | 110 | 110 |
| 00rbl.357 | 224 | 230 | 286 | 290 | 214 | 218 | 278 | 280 | 150 | 170 | 278 | 282 | 110 | 114 |
| 00rbl.359 | 222 | 224 | 290 | 292 | 214 | 214 | 280 | 300 | 168 | 192 | 272 | 298 | 110 | 110 |
| 00rbl.364 | 216 | 254 | 286 | 292 | 214 | 214 | 274 | 274 | 150 | 172 | 0   | 0   | 110 | 110 |
| 00rbl.372 | 224 | 226 | 282 | 290 | 214 | 222 | 268 | 298 | 178 | 200 | 276 | 284 | 110 | 110 |



|           |     |     |     |     |     |     |     |     |     |     |     |     |     |     |
|-----------|-----|-----|-----|-----|-----|-----|-----|-----|-----|-----|-----|-----|-----|-----|
| 01rbl.002 | 224 | 250 | 280 | 290 | 214 | 222 | 282 | 288 | 168 | 168 | 272 | 288 | 110 | 110 |
| 01rbl.003 | 212 | 216 | 282 | 284 | 220 | 222 | 282 | 304 | 192 | 216 | 272 | 280 | 110 | 114 |
| 01rbl.004 | 226 | 250 | 286 | 292 | 216 | 222 | 282 | 294 | 178 | 194 | 274 | 284 | 110 | 110 |
| 01rbl.005 | 226 | 254 | 282 | 290 | 216 | 216 | 274 | 298 | 210 | 210 | 286 | 288 | 110 | 110 |
| 01rbl.009 | 250 | 254 | 286 | 286 | 212 | 222 | 260 | 282 | 218 | 218 | 274 | 290 | 110 | 110 |
| 01rbl.010 | 218 | 258 | 282 | 284 | 204 | 222 | 258 | 278 | 150 | 218 | 292 | 304 | 110 | 114 |
| 01rbl.013 | 218 | 254 | 282 | 282 | 224 | 232 | 260 | 260 | 218 | 218 | 274 | 290 | 110 | 110 |
| 01rbl.015 | 214 | 218 | 284 | 286 | 220 | 222 | 284 | 284 | 194 | 218 | 272 | 274 | 110 | 110 |
| 01rbl.017 | 218 | 252 | 282 | 292 | 214 | 224 | 282 | 290 | 170 | 218 | 272 | 288 | 110 | 110 |
| 01rbl.021 | 216 | 224 | 284 | 292 | 216 | 222 | 260 | 300 | 168 | 176 | 288 | 310 | 112 | 112 |
| 01rbl.022 | 226 | 250 | 284 | 286 | 224 | 228 | 278 | 282 | 150 | 196 | 274 | 304 | 110 | 114 |
| 01rbl.023 | 228 | 230 | 288 | 292 | 212 | 216 | 260 | 298 | 200 | 202 | 292 | 294 | 110 | 114 |
| 01rbl.024 | 250 | 252 | 282 | 286 | 214 | 222 | 282 | 308 | 196 | 224 | 290 | 290 | 110 | 110 |
| 01rbl.025 | 218 | 218 | 286 | 286 | 204 | 222 | 260 | 292 | 174 | 218 | 290 | 292 | 110 | 110 |
| 01rbl.026 | 224 | 230 | 284 | 290 | 212 | 218 | 252 | 292 | 168 | 178 | 288 | 288 | 110 | 112 |
| 01rbl.027 | 226 | 234 | 286 | 294 | 204 | 210 | 274 | 290 | 168 | 224 | 290 | 300 | 110 | 110 |
| 01rbl.030 | 224 | 224 | 290 | 290 | 214 | 216 | 280 | 298 | 158 | 220 | 274 | 298 | 110 | 112 |
| 01rbl.031 | 222 | 222 | 282 | 282 | 216 | 218 | 282 | 296 | 176 | 206 | 290 | 290 | 110 | 112 |
| 01rbl.032 | 226 | 226 | 290 | 290 | 214 | 224 | 264 | 298 | 150 | 150 | 268 | 294 | 110 | 110 |
| 01rbl.035 | 224 | 224 | 282 | 288 | 208 | 218 | 260 | 276 | 150 | 166 | 282 | 300 | 110 | 110 |
| 01rbl.037 | 216 | 222 | 288 | 288 | 212 | 218 | 298 | 300 | 176 | 188 | 280 | 298 | 110 | 110 |
| 01rbl.038 | 230 | 230 | 284 | 284 | 212 | 222 | 250 | 270 | 162 | 162 | 294 | 304 | 110 | 110 |
| 01rbl.042 | 224 | 232 | 292 | 292 | 214 | 222 | 272 | 274 | 170 | 170 | 268 | 272 | 110 | 112 |
| 01rbl.044 | 224 | 224 | 288 | 290 | 216 | 220 | 214 | 214 | 174 | 208 | 276 | 286 | 110 | 112 |
| 01rbl.046 | 214 | 244 | 284 | 286 | 208 | 214 | 268 | 286 | 178 | 178 | 274 | 292 | 110 | 110 |
| 01rbl.049 | 224 | 230 | 288 | 292 | 218 | 222 | 272 | 274 | 194 | 194 | 266 | 288 | 110 | 110 |
| 01rbl.050 | 214 | 250 | 288 | 288 | 216 | 220 | 268 | 292 | 196 | 206 | 286 | 296 | 110 | 110 |
| 01rbl.051 | 226 | 226 | 282 | 286 | 214 | 218 | 256 | 276 | 170 | 206 | 276 | 288 | 110 | 110 |
| 01rbl.053 | 214 | 230 | 284 | 284 | 214 | 214 | 282 | 298 | 150 | 150 | 274 | 294 | 110 | 112 |
| 01rbl.054 | 230 | 238 | 284 | 290 | 214 | 218 | 280 | 282 | 150 | 168 | 280 | 294 | 110 | 110 |
| 01rbl.057 | 224 | 230 | 284 | 286 | 214 | 214 | 282 | 284 | 196 | 210 | 284 | 294 | 110 | 110 |
| 01rbl.060 | 232 | 238 | 290 | 290 | 206 | 216 | 252 | 312 | 198 | 208 | 280 | 298 | 110 | 110 |
| 01rbl.061 | 226 | 230 | 282 | 290 | 228 | 232 | 268 | 278 | 200 | 212 | 270 | 278 | 110 | 110 |
| 01rbl.063 | 214 | 214 | 282 | 286 | 214 | 216 | 266 | 270 | 198 | 202 | 284 | 298 | 110 | 110 |
| 01rbl.067 | 216 | 216 | 282 | 292 | 214 | 214 | 280 | 290 | 196 | 220 | 266 | 280 | 110 | 110 |
| 01rbl.069 | 212 | 216 | 290 | 290 | 218 | 218 | 252 | 292 | 170 | 198 | 280 | 290 | 110 | 112 |
| 01rbl.073 | 224 | 232 | 282 | 290 | 218 | 228 | 286 | 294 | 198 | 214 | 266 | 270 | 110 | 110 |

|           |     |     |     |     |     |     |     |     |     |     |     |     |     |     |
|-----------|-----|-----|-----|-----|-----|-----|-----|-----|-----|-----|-----|-----|-----|-----|
| 01rbl.074 | 216 | 224 | 290 | 290 | 212 | 232 | 280 | 288 | 170 | 170 | 292 | 302 | 110 | 110 |
| 01rbl.078 | 216 | 254 | 282 | 292 | 214 | 218 | 214 | 292 | 196 | 196 | 284 | 288 | 110 | 110 |
| 01rbl.079 | 226 | 226 | 282 | 286 | 210 | 218 | 300 | 304 | 194 | 194 | 288 | 288 | 110 | 112 |
| 01rbl.083 | 226 | 230 | 290 | 290 | 212 | 222 | 272 | 308 | 174 | 192 | 268 | 284 | 110 | 112 |
| 01rbl.086 | 226 | 228 | 280 | 290 | 212 | 220 | 288 | 288 | 150 | 174 | 274 | 284 | 110 | 110 |
| 01rbl.087 | 218 | 224 | 284 | 284 | 216 | 230 | 270 | 286 | 178 | 208 | 282 | 294 | 110 | 110 |
| 01rbl.088 | 216 | 224 | 284 | 290 | 208 | 214 | 284 | 292 | 172 | 172 | 284 | 294 | 110 | 110 |
| 01rbl.090 | 216 | 222 | 284 | 284 | 204 | 214 | 288 | 288 | 168 | 190 | 282 | 286 | 110 | 110 |
| 01rbl.091 | 220 | 226 | 280 | 292 | 216 | 218 | 280 | 288 | 162 | 188 | 282 | 284 | 110 | 110 |
| 01rbl.093 | 214 | 226 | 284 | 286 | 214 | 236 | 256 | 294 | 162 | 204 | 292 | 294 | 110 | 110 |
| 01rbl.094 | 222 | 224 | 290 | 290 | 214 | 214 | 286 | 292 | 178 | 186 | 278 | 284 | 110 | 110 |
| 01rbl.096 | 224 | 242 | 282 | 290 | 210 | 214 | 220 | 288 | 150 | 150 | 270 | 292 | 110 | 110 |
| 01rbl.099 | 226 | 228 | 288 | 290 | 204 | 220 | 220 | 288 | 150 | 196 | 294 | 298 | 110 | 112 |
| 01rbl.104 | 226 | 228 | 282 | 286 | 218 | 218 | 266 | 288 | 196 | 222 | 278 | 302 | 110 | 110 |
| 01rbl.105 | 228 | 228 | 284 | 288 | 220 | 230 | 260 | 312 | 198 | 216 | 276 | 290 | 110 | 112 |
| 01rbl.107 | 214 | 224 | 284 | 292 | 216 | 216 | 298 | 298 | 168 | 190 | 272 | 300 | 110 | 110 |
| 01rbl.108 | 230 | 254 | 284 | 288 | 214 | 222 | 254 | 300 | 176 | 192 | 278 | 286 | 110 | 110 |
| 01rbl.109 | 218 | 228 | 286 | 288 | 214 | 222 | 284 | 292 | 198 | 218 | 274 | 288 | 110 | 110 |
| 01rbl.110 | 226 | 248 | 282 | 290 | 204 | 218 | 214 | 284 | 192 | 192 | 268 | 292 | 112 | 114 |
| 01rbl.113 | 216 | 234 | 282 | 282 | 214 | 214 | 290 | 300 | 184 | 198 | 294 | 304 | 110 | 112 |
| 01rbl.114 | 224 | 254 | 286 | 288 | 216 | 218 | 276 | 300 | 198 | 198 | 276 | 290 | 110 | 110 |
| 01rbl.118 | 244 | 254 | 284 | 286 | 214 | 214 | 308 | 312 | 178 | 186 | 276 | 290 | 110 | 110 |
| 01rbl.119 | 216 | 226 | 288 | 288 | 222 | 236 | 256 | 306 | 192 | 196 | 284 | 294 | 110 | 110 |
| 01rbl.121 | 220 | 224 | 284 | 290 | 212 | 214 | 286 | 298 | 150 | 196 | 280 | 286 | 110 | 112 |
| 01rbl.122 | 232 | 234 | 286 | 286 | 212 | 236 | 276 | 298 | 200 | 216 | 264 | 288 | 110 | 110 |
| 01rbl.124 | 218 | 222 | 288 | 292 | 212 | 214 | 280 | 288 | 200 | 202 | 288 | 296 | 110 | 114 |
| 01rbl.125 | 224 | 224 | 286 | 290 | 214 | 214 | 270 | 286 | 166 | 214 | 280 | 288 | 110 | 110 |
| 01rbl.126 | 214 | 224 | 282 | 284 | 218 | 220 | 264 | 264 | 178 | 190 | 276 | 294 | 110 | 110 |
| 01rbl.128 | 226 | 226 | 282 | 286 | 214 | 218 | 256 | 296 | 192 | 194 | 280 | 294 | 110 | 110 |
| 01rbl.133 | 214 | 222 | 282 | 290 | 212 | 214 | 252 | 284 | 174 | 184 | 288 | 292 | 110 | 112 |
| 01rbl.135 | 222 | 226 | 282 | 288 | 214 | 220 | 280 | 312 | 150 | 200 | 276 | 288 | 110 | 110 |
| 01rbl.139 | 224 | 224 | 284 | 290 | 216 | 220 | 290 | 290 | 192 | 214 | 282 | 292 | 110 | 110 |
| 01rbl.140 | 214 | 254 | 284 | 292 | 212 | 216 | 270 | 286 | 168 | 168 | 280 | 286 | 110 | 110 |
| 01rbl.142 | 226 | 228 | 282 | 288 | 214 | 214 | 292 | 292 | 150 | 170 | 290 | 296 | 110 | 110 |
| 01rbl.143 | 218 | 252 | 284 | 286 | 214 | 216 | 296 | 296 | 180 | 180 | 288 | 290 | 110 | 110 |
| 01rbl.144 | 214 | 218 | 282 | 290 | 214 | 220 | 280 | 290 | 200 | 206 | 276 | 286 | 110 | 114 |
| 01rbl.149 | 214 | 214 | 282 | 290 | 214 | 220 | 290 | 312 | 168 | 192 | 276 | 286 | 110 | 114 |

|           |     |     |     |     |     |     |     |     |     |     |     |     |     |     |
|-----------|-----|-----|-----|-----|-----|-----|-----|-----|-----|-----|-----|-----|-----|-----|
| 01rbl.150 | 218 | 224 | 282 | 282 | 216 | 232 | 256 | 306 | 166 | 174 | 276 | 288 | 110 | 110 |
| 01rbl.153 | 226 | 228 | 284 | 290 | 216 | 216 | 270 | 278 | 150 | 168 | 286 | 288 | 110 | 110 |
| 01rbl.158 | 212 | 214 | 286 | 292 | 218 | 220 | 284 | 298 | 202 | 222 | 284 | 298 | 110 | 112 |
| 01rbl.159 | 214 | 250 | 282 | 290 | 210 | 216 | 288 | 306 | 150 | 192 | 278 | 290 | 110 | 110 |
| 01rbl.160 | 230 | 232 | 282 | 290 | 212 | 214 | 282 | 290 | 168 | 174 | 274 | 280 | 110 | 112 |
| 01rbl.161 | 218 | 224 | 290 | 290 | 214 | 216 | 294 | 306 | 168 | 168 | 268 | 276 | 110 | 110 |
| 01rbl.162 | 224 | 248 | 282 | 286 | 208 | 214 | 272 | 290 | 168 | 170 | 286 | 298 | 110 | 110 |
| 01rbl.163 | 228 | 232 | 282 | 286 | 210 | 222 | 272 | 288 | 200 | 210 | 280 | 280 | 110 | 112 |
| 01rbl.164 | 218 | 224 | 286 | 292 | 214 | 216 | 260 | 272 | 168 | 196 | 266 | 296 | 110 | 112 |
| 01rbl.165 | 218 | 224 | 286 | 292 | 202 | 218 | 306 | 308 | 192 | 192 | 284 | 290 | 110 | 112 |
| 01rbl.167 | 224 | 226 | 282 | 284 | 214 | 230 | 266 | 288 | 196 | 210 | 282 | 284 | 110 | 112 |
| 01rbl.168 | 232 | 248 | 290 | 290 | 216 | 218 | 292 | 292 | 150 | 168 | 276 | 288 | 110 | 114 |
| 01rbl.169 | 214 | 226 | 288 | 290 | 212 | 214 | 290 | 298 | 186 | 214 | 280 | 286 | 110 | 110 |
| 01rbl.170 | 222 | 232 | 282 | 290 | 210 | 212 | 294 | 298 | 170 | 200 | 274 | 278 | 110 | 110 |
| 01rbl.171 | 212 | 214 | 286 | 290 | 212 | 214 | 292 | 302 | 170 | 178 | 276 | 290 | 110 | 110 |
| 01rbl.172 | 214 | 234 | 282 | 290 | 214 | 214 | 290 | 302 | 178 | 200 | 290 | 298 | 110 | 110 |
| 01rbl.174 | 224 | 248 | 290 | 290 | 216 | 230 | 304 | 308 | 150 | 202 | 276 | 290 | 110 | 110 |
| 01rbl.175 | 212 | 222 | 282 | 284 | 212 | 232 | 252 | 284 | 170 | 198 | 266 | 288 | 110 | 110 |
| 01rbl.179 | 224 | 228 | 282 | 286 | 218 | 226 | 272 | 288 | 174 | 210 | 278 | 280 | 110 | 112 |
| 01rbl.180 | 212 | 228 | 282 | 290 | 214 | 222 | 282 | 302 | 224 | 224 | 268 | 282 | 112 | 112 |
| 01rbl.185 | 226 | 232 | 290 | 290 | 204 | 214 | 250 | 308 | 188 | 218 | 284 | 292 | 110 | 110 |
| 01rbl.188 | 226 | 228 | 286 | 290 | 214 | 222 | 290 | 290 | 166 | 200 | 276 | 290 | 110 | 112 |
| 01rbl.189 | 214 | 214 | 282 | 290 | 212 | 218 | 272 | 298 | 168 | 214 | 268 | 304 | 110 | 110 |
| 01rbl.191 | 222 | 224 | 284 | 290 | 212 | 214 | 270 | 288 | 192 | 198 | 288 | 300 | 110 | 110 |
| 01rbl.193 | 212 | 230 | 282 | 282 | 214 | 218 | 288 | 304 | 182 | 202 | 270 | 284 | 110 | 110 |
| 01rbl.194 | 212 | 214 | 282 | 286 | 210 | 222 | 264 | 272 | 204 | 204 | 288 | 296 | 110 | 112 |
| 01rbl.195 | 226 | 232 | 282 | 292 | 216 | 218 | 284 | 294 | 192 | 202 | 284 | 288 | 110 | 110 |
| 01rbl.196 | 218 | 254 | 282 | 290 | 212 | 220 | 278 | 278 | 150 | 170 | 280 | 286 | 110 | 112 |
| 01rbl.197 | 214 | 224 | 282 | 288 | 214 | 216 | 288 | 288 | 150 | 150 | 274 | 286 | 110 | 110 |
| 01rbl.198 | 214 | 214 | 290 | 292 | 204 | 236 | 280 | 308 | 170 | 172 | 278 | 288 | 110 | 110 |
| 01rbl.207 | 220 | 226 | 286 | 288 | 214 | 216 | 284 | 304 | 182 | 182 | 292 | 292 | 110 | 110 |
| 01rbl.209 | 226 | 238 | 282 | 290 | 204 | 218 | 272 | 284 | 170 | 178 | 276 | 282 | 110 | 110 |
| 01rbl.211 | 238 | 244 | 282 | 284 | 216 | 216 | 272 | 282 | 150 | 214 | 282 | 292 | 110 | 110 |
| 01rbl.212 | 224 | 244 | 286 | 292 | 214 | 214 | 272 | 298 | 150 | 168 | 264 | 288 | 110 | 110 |
| 01rbl.213 | 216 | 228 | 282 | 282 | 214 | 218 | 252 | 306 | 170 | 170 | 294 | 306 | 110 | 114 |
| 01rbl.214 | 214 | 224 | 280 | 292 | 214 | 218 | 286 | 306 | 168 | 206 | 272 | 278 | 110 | 112 |
| 01rbl.215 | 224 | 232 | 282 | 290 | 214 | 214 | 298 | 298 | 166 | 194 | 282 | 288 | 110 | 110 |

|           |     |     |     |     |     |     |     |     |     |     |     |     |     |     |
|-----------|-----|-----|-----|-----|-----|-----|-----|-----|-----|-----|-----|-----|-----|-----|
| 01rbl.216 | 214 | 248 | 282 | 290 | 204 | 218 | 286 | 286 | 196 | 208 | 282 | 284 | 110 | 112 |
| 01rbl.217 | 222 | 224 | 288 | 290 | 212 | 218 | 292 | 296 | 174 | 202 | 286 | 288 | 110 | 112 |
| 01rbl.218 | 224 | 244 | 282 | 286 | 210 | 214 | 252 | 270 | 178 | 178 | 282 | 292 | 110 | 110 |
| 01rbl.220 | 224 | 226 | 290 | 290 | 222 | 222 | 274 | 292 | 194 | 210 | 284 | 288 | 110 | 112 |
| 01rbl.221 | 218 | 218 | 284 | 290 | 220 | 224 | 272 | 272 | 196 | 214 | 292 | 300 | 110 | 110 |
| 01rbl.223 | 222 | 224 | 284 | 286 | 214 | 222 | 260 | 270 | 204 | 204 | 280 | 298 | 110 | 110 |
| 01rbl.224 | 222 | 232 | 286 | 290 | 214 | 216 | 286 | 298 | 168 | 168 | 268 | 280 | 110 | 110 |
| 01rbl.225 | 214 | 228 | 282 | 284 | 206 | 220 | 282 | 308 | 170 | 170 | 284 | 300 | 110 | 112 |
| 01rbl.232 | 222 | 224 | 282 | 290 | 214 | 226 | 290 | 312 | 180 | 182 | 284 | 292 | 110 | 110 |
| 02rbl.002 | 214 | 232 | 284 | 286 | 218 | 222 | 284 | 294 | 190 | 208 | 270 | 276 | 110 | 110 |
| 02rbl.003 | 224 | 226 | 286 | 290 | 208 | 210 | 270 | 274 | 168 | 176 | 290 | 294 | 112 | 112 |
| 02rbl.004 | 222 | 228 | 282 | 282 | 208 | 210 | 266 | 272 | 182 | 184 | 276 | 294 | 110 | 112 |
| 02rbl.008 | 226 | 230 | 286 | 292 | 214 | 218 | 268 | 312 | 186 | 204 | 284 | 310 | 110 | 110 |
| 02rbl.011 | 218 | 222 | 282 | 292 | 212 | 214 | 254 | 270 | 170 | 176 | 274 | 294 | 110 | 112 |
| 02rbl.012 | 216 | 226 | 284 | 288 | 214 | 218 | 272 | 286 | 174 | 208 | 262 | 288 | 110 | 112 |
| 02rbl.014 | 228 | 228 | 286 | 294 | 212 | 218 | 272 | 280 | 160 | 208 | 276 | 286 | 110 | 110 |
| 02rbl.016 | 226 | 230 | 284 | 290 | 208 | 218 | 264 | 312 | 170 | 202 | 270 | 274 | 110 | 110 |
| 02rbl.018 | 224 | 226 | 284 | 294 | 214 | 214 | 290 | 290 | 170 | 192 | 270 | 296 | 110 | 112 |
| 02rbl.019 | 226 | 226 | 288 | 292 | 216 | 218 | 278 | 286 | 150 | 172 | 270 | 288 | 110 | 110 |
| 02rbl.020 | 216 | 254 | 288 | 288 | 208 | 218 | 252 | 286 | 170 | 174 | 274 | 288 | 110 | 110 |
| 02rbl.024 | 218 | 232 | 282 | 286 | 212 | 214 | 272 | 282 | 150 | 216 | 286 | 288 | 110 | 112 |
| 02rbl.025 | 224 | 224 | 282 | 282 | 212 | 214 | 270 | 304 | 174 | 184 | 274 | 288 | 110 | 112 |
| 02rbl.030 | 230 | 238 | 282 | 282 | 218 | 218 | 278 | 312 | 200 | 202 | 274 | 288 | 110 | 110 |
| 02rbl.032 | 218 | 234 | 282 | 290 | 212 | 216 | 254 | 270 | 206 | 226 | 270 | 284 | 110 | 110 |
| 02rbl.033 | 222 | 254 | 282 | 290 | 218 | 222 | 284 | 288 | 192 | 198 | 286 | 286 | 110 | 110 |
| 02rbl.038 | 228 | 228 | 286 | 292 | 212 | 218 | 268 | 270 | 210 | 210 | 294 | 294 | 110 | 110 |
| 02rbl.039 | 232 | 238 | 282 | 282 | 214 | 214 | 272 | 304 | 178 | 218 | 276 | 288 | 110 | 110 |
| 02rbl.043 | 226 | 252 | 286 | 290 | 210 | 216 | 308 | 308 | 172 | 202 | 262 | 296 | 110 | 110 |
| 02rbl.048 | 214 | 232 | 282 | 284 | 208 | 214 | 254 | 300 | 168 | 192 | 280 | 294 | 110 | 110 |
| 02rbl.053 | 230 | 248 | 282 | 292 | 212 | 222 | 270 | 290 | 190 | 192 | 274 | 300 | 110 | 110 |
| 02rbl.061 | 222 | 224 | 282 | 286 | 214 | 236 | 258 | 288 | 150 | 166 | 282 | 290 | 110 | 112 |
| 02rbl.062 | 214 | 238 | 286 | 292 | 214 | 222 | 256 | 304 | 166 | 192 | 266 | 278 | 112 | 112 |
| 02rbl.067 | 214 | 224 | 284 | 292 | 214 | 218 | 290 | 300 | 150 | 186 | 296 | 298 | 110 | 110 |
| 02rbl.068 | 214 | 224 | 290 | 292 | 210 | 214 | 264 | 290 | 192 | 192 | 290 | 292 | 110 | 110 |
| 02rbl.071 | 212 | 224 | 284 | 292 | 204 | 208 | 270 | 294 | 194 | 200 | 274 | 290 | 110 | 110 |
| 02rbl.072 | 216 | 224 | 284 | 290 | 214 | 214 | 264 | 290 | 192 | 192 | 284 | 296 | 110 | 110 |
| 02rbl.078 | 212 | 214 | 282 | 282 | 204 | 204 | 254 | 288 | 174 | 202 | 284 | 290 | 110 | 110 |

|           |     |     |     |     |     |     |     |     |     |     |     |     |     |     |
|-----------|-----|-----|-----|-----|-----|-----|-----|-----|-----|-----|-----|-----|-----|-----|
| 02rbl.083 | 214 | 226 | 282 | 288 | 218 | 222 | 298 | 304 | 196 | 204 | 274 | 288 | 110 | 110 |
| 02rbl.086 | 216 | 220 | 286 | 290 | 214 | 222 | 270 | 288 | 174 | 192 | 282 | 288 | 110 | 112 |
| 02rbl.088 | 224 | 224 | 286 | 290 | 216 | 222 | 264 | 290 | 202 | 222 | 278 | 288 | 110 | 112 |
| 02rbl.093 | 224 | 224 | 284 | 290 | 210 | 232 | 278 | 290 | 192 | 196 | 290 | 296 | 110 | 110 |
| 02rbl.095 | 224 | 226 | 288 | 290 | 208 | 214 | 266 | 312 | 170 | 198 | 282 | 284 | 110 | 110 |
| 02rbl.100 | 226 | 244 | 284 | 292 | 214 | 218 | 298 | 304 | 170 | 196 | 282 | 290 | 110 | 110 |
| 02rbl.102 | 218 | 224 | 282 | 286 | 220 | 222 | 266 | 294 | 206 | 208 | 278 | 288 | 110 | 110 |
| 02rbl.107 | 224 | 232 | 282 | 286 | 214 | 230 | 290 | 300 | 192 | 216 | 282 | 284 | 110 | 110 |
| 02rbl.108 | 224 | 228 | 284 | 284 | 212 | 214 | 274 | 292 | 192 | 192 | 286 | 288 | 110 | 110 |
| 02rbl.114 | 222 | 236 | 288 | 290 | 214 | 224 | 266 | 292 | 150 | 170 | 278 | 282 | 114 | 114 |
| 02rbl.117 | 216 | 218 | 284 | 288 | 214 | 222 | 214 | 312 | 162 | 226 | 286 | 300 | 110 | 110 |
| 02rbl.121 | 228 | 254 | 286 | 286 | 220 | 222 | 254 | 284 | 192 | 198 | 284 | 286 | 110 | 110 |
| 02rbl.126 | 214 | 214 | 282 | 290 | 212 | 214 | 272 | 274 | 162 | 200 | 274 | 282 | 110 | 112 |
| 02rbl.128 | 224 | 256 | 284 | 290 | 214 | 218 | 270 | 290 | 170 | 176 | 294 | 298 | 110 | 112 |
| 02rbl.132 | 228 | 244 | 284 | 290 | 214 | 214 | 262 | 314 | 170 | 202 | 284 | 296 | 110 | 114 |
| 02rbl.133 | 222 | 222 | 290 | 290 | 214 | 220 | 214 | 296 | 196 | 200 | 270 | 286 | 110 | 112 |
| 02rbl.137 | 214 | 214 | 288 | 288 | 216 | 216 | 292 | 298 | 192 | 194 | 286 | 294 | 110 | 112 |
| 02rbl.140 | 224 | 226 | 284 | 288 | 208 | 216 | 286 | 296 | 202 | 222 | 280 | 298 | 110 | 110 |
| 02rbl.142 | 228 | 228 | 282 | 286 | 214 | 236 | 304 | 306 | 196 | 196 | 268 | 294 | 110 | 110 |
| 02rbl.146 | 224 | 224 | 282 | 292 | 214 | 214 | 286 | 304 | 150 | 168 | 282 | 294 | 112 | 112 |
| 02rbl.149 | 230 | 232 | 282 | 290 | 218 | 230 | 296 | 304 | 170 | 174 | 272 | 300 | 110 | 114 |
| 02rbl.152 | 212 | 244 | 282 | 282 | 218 | 230 | 294 | 298 | 168 | 192 | 282 | 284 | 110 | 110 |
| 02rbl.153 | 226 | 232 | 286 | 288 | 218 | 228 | 264 | 268 | 174 | 174 | 270 | 276 | 110 | 110 |
| 02rbl.157 | 226 | 232 | 282 | 286 | 214 | 214 | 260 | 294 | 188 | 196 | 276 | 284 | 110 | 110 |
| 02rbl.159 | 216 | 244 | 284 | 286 | 222 | 232 | 272 | 278 | 210 | 210 | 274 | 288 | 110 | 112 |
| 02rbl.161 | 0   | 0   | 280 | 286 | 218 | 218 | 288 | 298 | 198 | 202 | 286 | 300 | 110 | 110 |
| 02rbl.163 | 224 | 228 | 286 | 294 | 218 | 222 | 220 | 270 | 208 | 210 | 284 | 294 | 110 | 110 |
| 02rbl.164 | 214 | 222 | 286 | 292 | 214 | 218 | 278 | 298 | 186 | 206 | 280 | 284 | 110 | 110 |
| 02rbl.165 | 212 | 228 | 286 | 292 | 216 | 236 | 258 | 260 | 182 | 196 | 274 | 300 | 110 | 110 |
| 02rbl.172 | 216 | 230 | 284 | 286 | 214 | 220 | 252 | 314 | 202 | 202 | 276 | 278 | 112 | 114 |
| 02rbl.173 | 222 | 222 | 286 | 290 | 208 | 216 | 272 | 280 | 190 | 200 | 276 | 284 | 110 | 110 |
| 02rbl.180 | 214 | 226 | 282 | 282 | 210 | 216 | 272 | 286 | 206 | 212 | 298 | 306 | 110 | 112 |
| 02rbl.184 | 214 | 224 | 282 | 286 | 210 | 214 | 268 | 282 | 166 | 196 | 284 | 286 | 110 | 110 |
| 02rbl.185 | 222 | 244 | 282 | 292 | 214 | 214 | 272 | 272 | 150 | 190 | 284 | 296 | 110 | 110 |
| 02rbl.186 | 216 | 246 | 286 | 288 | 208 | 214 | 278 | 308 | 150 | 170 | 276 | 284 | 110 | 110 |
| 02rbl.188 | 222 | 232 | 282 | 284 | 204 | 208 | 254 | 272 | 168 | 168 | 282 | 296 | 110 | 110 |
| 02rbl.192 | 228 | 232 | 286 | 286 | 212 | 222 | 272 | 290 | 192 | 192 | 284 | 284 | 110 | 110 |

|           |     |     |     |     |     |     |     |     |     |     |     |     |     |     |
|-----------|-----|-----|-----|-----|-----|-----|-----|-----|-----|-----|-----|-----|-----|-----|
| 02rbl.197 | 224 | 248 | 286 | 290 | 212 | 214 | 286 | 298 | 166 | 202 | 284 | 300 | 110 | 110 |
| 02rbl.201 | 214 | 214 | 284 | 284 | 212 | 212 | 222 | 292 | 190 | 220 | 274 | 288 | 110 | 110 |
| 02rbl.210 | 226 | 230 | 284 | 284 | 204 | 218 | 268 | 292 | 188 | 216 | 274 | 292 | 110 | 110 |
| 02rbl.212 | 234 | 248 | 284 | 288 | 212 | 212 | 282 | 290 | 174 | 200 | 270 | 286 | 110 | 112 |
| 02rbl.214 | 212 | 226 | 284 | 292 | 214 | 218 | 298 | 298 | 150 | 212 | 270 | 288 | 110 | 110 |
| 02rbl.215 | 224 | 226 | 284 | 292 | 204 | 216 | 260 | 284 | 196 | 196 | 270 | 292 | 110 | 110 |
| 02rbl.216 | 212 | 228 | 288 | 288 | 218 | 220 | 264 | 276 | 168 | 196 | 288 | 288 | 110 | 110 |
| 02rbl.217 | 214 | 226 | 284 | 284 | 204 | 222 | 292 | 296 | 168 | 174 | 272 | 296 | 110 | 110 |
| 02rbl.223 | 216 | 224 | 290 | 292 | 202 | 214 | 284 | 286 | 178 | 196 | 286 | 286 | 110 | 110 |
| 02rbl.226 | 218 | 220 | 284 | 286 | 214 | 214 | 278 | 288 | 168 | 190 | 278 | 288 | 110 | 110 |
| 02rbl.229 | 224 | 250 | 286 | 292 | 210 | 216 | 260 | 290 | 172 | 172 | 266 | 288 | 112 | 112 |
| 02rbl.230 | 250 | 250 | 292 | 294 | 212 | 214 | 270 | 274 | 170 | 192 | 284 | 286 | 110 | 110 |
| 02rbl.235 | 216 | 218 | 286 | 288 | 212 | 214 | 252 | 292 | 168 | 188 | 262 | 274 | 110 | 110 |
| 02rbl.236 | 218 | 218 | 286 | 286 | 208 | 214 | 286 | 294 | 172 | 210 | 266 | 288 | 110 | 112 |
| 02rbl.237 | 222 | 224 | 284 | 286 | 210 | 214 | 288 | 288 | 202 | 216 | 266 | 274 | 110 | 110 |
| 02rbl.242 | 254 | 258 | 282 | 292 | 214 | 218 | 256 | 276 | 170 | 200 | 270 | 274 | 110 | 110 |
| 02rbl.243 | 218 | 218 | 282 | 282 | 208 | 218 | 272 | 288 | 206 | 222 | 270 | 282 | 110 | 110 |
| 02rbl.246 | 228 | 228 | 282 | 292 | 202 | 214 | 256 | 312 | 190 | 192 | 270 | 284 | 110 | 110 |
| 02rbl.252 | 212 | 224 | 288 | 292 | 210 | 214 | 288 | 302 | 168 | 196 | 272 | 288 | 110 | 110 |
| 02rbl.253 | 222 | 222 | 282 | 282 | 216 | 218 | 286 | 290 | 202 | 208 | 284 | 286 | 110 | 112 |
| 02rbl.254 | 214 | 224 | 286 | 290 | 214 | 218 | 256 | 302 | 190 | 200 | 282 | 296 | 110 | 112 |
| 02rbl.255 | 222 | 248 | 286 | 290 | 214 | 218 | 284 | 288 | 190 | 190 | 290 | 294 | 110 | 110 |
| 02rbl.260 | 224 | 238 | 282 | 290 | 204 | 212 | 264 | 264 | 190 | 202 | 284 | 300 | 110 | 110 |
| 02rbl.261 | 226 | 248 | 284 | 290 | 212 | 222 | 278 | 282 | 168 | 200 | 266 | 304 | 110 | 110 |
| 02rbl.264 | 212 | 224 | 288 | 290 | 214 | 222 | 250 | 312 | 168 | 200 | 284 | 304 | 110 | 110 |
| 02rbl.265 | 224 | 230 | 282 | 284 | 204 | 212 | 270 | 294 | 196 | 214 | 292 | 294 | 110 | 110 |
| 02rbl.267 | 214 | 224 | 290 | 290 | 214 | 218 | 280 | 290 | 180 | 182 | 282 | 284 | 110 | 110 |
| 02rbl.268 | 222 | 224 | 282 | 286 | 212 | 222 | 272 | 282 | 172 | 208 | 282 | 284 | 110 | 112 |
| 02rbl.271 | 214 | 228 | 284 | 286 | 214 | 236 | 278 | 308 | 170 | 170 | 274 | 284 | 110 | 110 |
| 02rbl.274 | 224 | 230 | 284 | 286 | 214 | 218 | 250 | 254 | 186 | 190 | 270 | 282 | 110 | 110 |
| 02rbl.277 | 226 | 226 | 282 | 286 | 210 | 218 | 256 | 292 | 170 | 170 | 276 | 284 | 110 | 110 |
| 02rbl.278 | 254 | 254 | 286 | 292 | 208 | 214 | 274 | 288 | 178 | 184 | 286 | 286 | 110 | 110 |
| 02rbl.279 | 218 | 230 | 286 | 290 | 214 | 218 | 220 | 298 | 194 | 202 | 274 | 286 | 110 | 110 |
| 02rbl.291 | 218 | 224 | 286 | 290 | 214 | 218 | 308 | 308 | 194 | 202 | 274 | 284 | 110 | 112 |
| 02rbl.295 | 214 | 224 | 286 | 290 | 204 | 214 | 288 | 308 | 150 | 178 | 274 | 274 | 110 | 112 |
| 02rbl.300 | 218 | 224 | 282 | 290 | 202 | 214 | 220 | 308 | 150 | 210 | 278 | 286 | 110 | 112 |
| 02rbl.304 | 214 | 224 | 282 | 292 | 212 | 214 | 254 | 278 | 198 | 202 | 262 | 290 | 110 | 110 |

|           |     |     |     |     |     |     |     |     |     |     |     |     |     |     |
|-----------|-----|-----|-----|-----|-----|-----|-----|-----|-----|-----|-----|-----|-----|-----|
| 02rbl.306 | 220 | 228 | 282 | 282 | 222 | 236 | 220 | 252 | 202 | 208 | 270 | 274 | 110 | 110 |
| 02rbl.307 | 214 | 226 | 290 | 290 | 204 | 236 | 256 | 282 | 170 | 178 | 284 | 294 | 110 | 110 |
| 02rbl.311 | 218 | 218 | 282 | 288 | 214 | 214 | 282 | 294 | 202 | 204 | 270 | 274 | 110 | 112 |
| 02rbl.319 | 224 | 226 | 286 | 286 | 214 | 216 | 270 | 272 | 166 | 168 | 288 | 288 | 110 | 112 |
| 02rbl.323 | 222 | 222 | 288 | 290 | 204 | 212 | 256 | 312 | 170 | 202 | 290 | 298 | 110 | 110 |
| 02rbl.327 | 238 | 246 | 286 | 290 | 208 | 210 | 282 | 286 | 190 | 196 | 282 | 286 | 110 | 110 |
| 02rbl.328 | 212 | 216 | 282 | 282 | 202 | 216 | 280 | 292 | 150 | 202 | 286 | 288 | 110 | 110 |
| 02rbl.330 | 222 | 232 | 282 | 286 | 202 | 214 | 290 | 298 | 162 | 190 | 278 | 288 | 112 | 114 |
| 02rbl.335 | 218 | 224 | 282 | 282 | 216 | 232 | 288 | 288 | 170 | 170 | 274 | 290 | 110 | 110 |
| 02rbl.337 | 212 | 214 | 284 | 290 | 212 | 218 | 214 | 268 | 202 | 202 | 288 | 288 | 110 | 110 |
| 02rbl.338 | 216 | 226 | 282 | 290 | 208 | 210 | 278 | 284 | 168 | 174 | 286 | 288 | 110 | 110 |
| 02rbl.339 | 214 | 226 | 288 | 290 | 216 | 218 | 264 | 272 | 208 | 208 | 286 | 288 | 110 | 114 |
| 02rbl.340 | 224 | 224 | 286 | 290 | 208 | 210 | 260 | 272 | 170 | 190 | 264 | 288 | 110 | 112 |
| 02rbl.341 | 224 | 224 | 282 | 286 | 214 | 222 | 274 | 300 | 162 | 192 | 276 | 308 | 110 | 114 |
| 02rbl.345 | 224 | 252 | 282 | 282 | 210 | 218 | 270 | 270 | 176 | 176 | 276 | 292 | 110 | 110 |
| 02rbl.350 | 222 | 224 | 282 | 282 | 204 | 216 | 304 | 304 | 166 | 168 | 286 | 298 | 110 | 110 |
| 02rbl.351 | 214 | 224 | 290 | 290 | 216 | 218 | 272 | 272 | 170 | 208 | 280 | 284 | 110 | 110 |
| 02rbl.353 | 212 | 214 | 284 | 290 | 210 | 216 | 272 | 272 | 196 | 196 | 282 | 294 | 110 | 110 |
| 03rbl.001 | 228 | 232 | 290 | 290 | 212 | 222 | 274 | 274 | 150 | 150 | 276 | 288 | 112 | 112 |
| 03rbl.005 | 218 | 224 | 284 | 292 | 216 | 220 | 254 | 290 | 150 | 150 | 272 | 298 | 110 | 110 |
| 03rbl.006 | 222 | 224 | 280 | 290 | 214 | 218 | 290 | 298 | 174 | 174 | 266 | 292 | 110 | 112 |
| 03rbl.015 | 214 | 226 | 284 | 286 | 214 | 218 | 252 | 292 | 170 | 170 | 274 | 284 | 112 | 112 |
| 03rbl.016 | 214 | 232 | 280 | 290 | 208 | 222 | 254 | 312 | 150 | 208 | 268 | 286 | 110 | 110 |
| 03rbl.019 | 214 | 216 | 284 | 288 | 216 | 218 | 256 | 292 | 208 | 208 | 276 | 276 | 110 | 112 |
| 03rbl.023 | 228 | 248 | 282 | 284 | 210 | 222 | 292 | 306 | 170 | 170 | 286 | 296 | 110 | 110 |
| 03rbl.026 | 214 | 216 | 282 | 284 | 214 | 222 | 272 | 276 | 166 | 200 | 282 | 298 | 110 | 110 |
| 03rbl.027 | 226 | 228 | 282 | 286 | 224 | 232 | 294 | 312 | 198 | 208 | 272 | 288 | 110 | 110 |
| 03rbl.029 | 232 | 252 | 288 | 290 | 220 | 228 | 254 | 254 | 174 | 178 | 288 | 290 | 110 | 112 |
| 03rbl.030 | 214 | 214 | 290 | 290 | 220 | 222 | 264 | 278 | 168 | 194 | 292 | 294 | 110 | 110 |
| 03rbl.031 | 214 | 226 | 282 | 288 | 210 | 214 | 278 | 278 | 168 | 228 | 286 | 288 | 110 | 110 |
| 03rbl.032 | 214 | 244 | 282 | 290 | 214 | 220 | 282 | 282 | 150 | 166 | 284 | 300 | 110 | 110 |
| 03rbl.033 | 226 | 250 | 286 | 288 | 218 | 220 | 286 | 294 | 168 | 206 | 278 | 284 | 110 | 112 |
| 03rbl.034 | 212 | 224 | 282 | 290 | 214 | 214 | 286 | 286 | 162 | 196 | 288 | 298 | 110 | 110 |
| 03rbl.035 | 214 | 248 | 290 | 290 | 216 | 218 | 276 | 280 | 170 | 178 | 268 | 286 | 110 | 110 |
| 03rbl.038 | 218 | 232 | 282 | 290 | 214 | 218 | 290 | 298 | 170 | 200 | 280 | 280 | 110 | 110 |
| 03rbl.039 | 218 | 218 | 284 | 290 | 214 | 214 | 280 | 288 | 168 | 206 | 286 | 288 | 110 | 110 |
| 03rbl.041 | 214 | 228 | 284 | 290 | 208 | 208 | 296 | 296 | 172 | 172 | 282 | 298 | 110 | 112 |

|           |     |     |     |     |     |     |     |     |     |     |     |     |     |     |
|-----------|-----|-----|-----|-----|-----|-----|-----|-----|-----|-----|-----|-----|-----|-----|
| 03rbl.042 | 214 | 222 | 282 | 284 | 218 | 222 | 272 | 280 | 184 | 196 | 276 | 282 | 110 | 110 |
| 03rbl.043 | 222 | 224 | 282 | 284 | 212 | 218 | 248 | 274 | 168 | 176 | 288 | 288 | 110 | 110 |
| 03rbl.044 | 214 | 244 | 282 | 286 | 214 | 218 | 272 | 306 | 166 | 172 | 284 | 288 | 110 | 110 |
| 03rbl.046 | 218 | 238 | 282 | 290 | 214 | 218 | 288 | 296 | 170 | 170 | 266 | 268 | 110 | 110 |
| 03rbl.049 | 228 | 232 | 282 | 286 | 228 | 234 | 268 | 292 | 170 | 198 | 270 | 294 | 110 | 110 |
| 03rbl.050 | 224 | 224 | 286 | 288 | 204 | 216 | 256 | 304 | 194 | 214 | 270 | 280 | 110 | 110 |
| 03rbl.053 | 214 | 230 | 290 | 290 | 208 | 218 | 214 | 254 | 168 | 192 | 264 | 292 | 110 | 110 |
| 03rbl.054 | 226 | 248 | 286 | 290 | 218 | 230 | 272 | 286 | 168 | 194 | 276 | 292 | 110 | 110 |
| 03rbl.057 | 222 | 224 | 282 | 282 | 214 | 214 | 268 | 300 | 170 | 176 | 282 | 300 | 110 | 110 |
| 03rbl.058 | 214 | 218 | 284 | 286 | 212 | 214 | 264 | 284 | 170 | 174 | 284 | 292 | 110 | 110 |
| 03rbl.059 | 222 | 232 | 284 | 290 | 210 | 214 | 272 | 272 | 196 | 196 | 280 | 288 | 112 | 112 |
| 03rbl.063 | 222 | 224 | 282 | 286 | 212 | 218 | 294 | 294 | 188 | 206 | 264 | 280 | 110 | 112 |
| 03rbl.069 | 214 | 222 | 282 | 282 | 212 | 214 | 272 | 286 | 168 | 182 | 282 | 284 | 110 | 110 |
| 03rbl.070 | 214 | 222 | 284 | 286 | 220 | 222 | 256 | 312 | 162 | 168 | 266 | 288 | 110 | 110 |
| 03rbl.071 | 228 | 228 | 282 | 284 | 212 | 218 | 278 | 284 | 186 | 202 | 278 | 292 | 110 | 110 |
| 03rbl.072 | 214 | 222 | 282 | 284 | 210 | 218 | 278 | 282 | 186 | 186 | 278 | 292 | 110 | 110 |
| 03rbl.076 | 224 | 224 | 280 | 290 | 202 | 218 | 284 | 284 | 194 | 202 | 284 | 288 | 110 | 110 |
| 03rbl.082 | 214 | 254 | 286 | 286 | 214 | 218 | 282 | 298 | 170 | 170 | 266 | 284 | 110 | 112 |
| 03rbl.086 | 224 | 224 | 284 | 290 | 204 | 214 | 270 | 284 | 150 | 190 | 288 | 304 | 110 | 110 |
| 03rbl.089 | 214 | 226 | 282 | 284 | 210 | 214 | 258 | 266 | 190 | 206 | 264 | 280 | 110 | 110 |
| 03rbl.091 | 226 | 228 | 284 | 290 | 208 | 214 | 264 | 310 | 180 | 204 | 280 | 288 | 110 | 110 |
| 03rbl.093 | 218 | 244 | 282 | 292 | 212 | 222 | 264 | 272 | 166 | 192 | 270 | 282 | 110 | 110 |
| 03rbl.105 | 222 | 224 | 282 | 286 | 214 | 216 | 282 | 286 | 166 | 204 | 276 | 288 | 110 | 112 |
| 03rbl.106 | 214 | 216 | 284 | 286 | 216 | 220 | 272 | 284 | 170 | 186 | 284 | 284 | 110 | 110 |
| 03rbl.108 | 224 | 224 | 286 | 290 | 204 | 216 | 286 | 292 | 194 | 204 | 286 | 286 | 110 | 112 |
| 03rbl.112 | 226 | 228 | 282 | 286 | 204 | 214 | 282 | 292 | 166 | 196 | 278 | 286 | 110 | 110 |
| 03rbl.114 | 224 | 250 | 282 | 286 | 204 | 210 | 270 | 290 | 170 | 170 | 276 | 288 | 110 | 110 |
| 03rbl.115 | 222 | 226 | 282 | 286 | 202 | 214 | 270 | 286 | 180 | 204 | 288 | 290 | 110 | 112 |
| 03rbl.116 | 226 | 228 | 282 | 284 | 204 | 220 | 274 | 288 | 170 | 196 | 284 | 286 | 110 | 112 |
| 03rbl.122 | 224 | 226 | 286 | 286 | 202 | 212 | 272 | 290 | 186 | 204 | 276 | 284 | 110 | 110 |
| 03rbl.124 | 224 | 252 | 286 | 288 | 202 | 210 | 288 | 288 | 150 | 204 | 276 | 284 | 112 | 112 |
| 03rbl.137 | 224 | 232 | 282 | 282 | 216 | 228 | 284 | 296 | 210 | 210 | 270 | 270 | 110 | 110 |
| 03rbl.138 | 212 | 224 | 282 | 290 | 214 | 218 | 266 | 282 | 202 | 204 | 270 | 288 | 110 | 110 |
| 03rbl.140 | 212 | 238 | 282 | 290 | 216 | 218 | 308 | 308 | 176 | 220 | 286 | 290 | 110 | 110 |
| 03rbl.142 | 222 | 226 | 284 | 292 | 210 | 216 | 268 | 284 | 174 | 190 | 298 | 302 | 110 | 112 |
| 03rbl.145 | 224 | 224 | 282 | 286 | 208 | 208 | 298 | 308 | 208 | 208 | 270 | 276 | 110 | 112 |
| 03rbl.146 | 228 | 232 | 290 | 290 | 218 | 218 | 292 | 312 | 194 | 208 | 268 | 272 | 110 | 110 |



|           |     |     |     |     |     |     |     |     |     |     |     |     |     |     |
|-----------|-----|-----|-----|-----|-----|-----|-----|-----|-----|-----|-----|-----|-----|-----|
| 03rbl.149 | 224 | 232 | 290 | 292 | 218 | 218 | 220 | 292 | 170 | 194 | 268 | 290 | 110 | 110 |
| 03rbl.150 | 218 | 218 | 282 | 290 | 212 | 214 | 262 | 278 | 168 | 170 | 286 | 292 | 110 | 110 |
| 03rbl.156 | 228 | 244 | 282 | 286 | 218 | 222 | 284 | 300 | 182 | 208 | 266 | 290 | 110 | 110 |
| 03rbl.157 | 222 | 224 | 292 | 292 | 202 | 208 | 282 | 282 | 190 | 202 | 272 | 276 | 110 | 110 |
| 03rbl.159 | 228 | 244 | 284 | 290 | 214 | 216 | 270 | 294 | 150 | 170 | 278 | 284 | 110 | 112 |
| 03rbl.160 | 222 | 224 | 282 | 290 | 218 | 234 | 254 | 290 | 168 | 174 | 280 | 284 | 110 | 110 |
| 03rbl.165 | 214 | 222 | 286 | 286 | 218 | 218 | 284 | 290 | 150 | 192 | 284 | 284 | 110 | 112 |
| 03rbl.167 | 214 | 214 | 286 | 286 | 210 | 214 | 250 | 260 | 170 | 202 | 276 | 288 | 110 | 112 |
| 03rbl.171 | 214 | 226 | 282 | 288 | 210 | 210 | 272 | 308 | 166 | 194 | 284 | 284 | 110 | 114 |
| 03rbl.173 | 222 | 226 | 282 | 282 | 212 | 214 | 274 | 274 | 150 | 198 | 276 | 286 | 110 | 114 |
| 03rbl.174 | 214 | 244 | 282 | 290 | 216 | 218 | 272 | 298 | 170 | 198 | 286 | 302 | 110 | 110 |
| 03rbl.176 | 224 | 248 | 282 | 286 | 210 | 212 | 280 | 284 | 182 | 186 | 290 | 296 | 110 | 110 |
| 03rbl.178 | 218 | 228 | 288 | 290 | 212 | 214 | 268 | 286 | 150 | 150 | 278 | 282 | 112 | 112 |
| 03rbl.179 | 224 | 226 | 290 | 290 | 212 | 216 | 292 | 306 | 196 | 204 | 296 | 300 | 110 | 110 |
| 03rbl.181 | 226 | 228 | 282 | 284 | 208 | 218 | 288 | 288 | 174 | 226 | 268 | 286 | 110 | 112 |
| 03rbl.185 | 214 | 214 | 286 | 290 | 216 | 222 | 288 | 290 | 150 | 168 | 288 | 294 | 110 | 110 |
| 03rbl.190 | 224 | 224 | 282 | 286 | 210 | 220 | 272 | 274 | 178 | 196 | 288 | 296 | 110 | 110 |
| 03rbl.192 | 222 | 224 | 282 | 290 | 212 | 216 | 272 | 294 | 168 | 202 | 268 | 302 | 110 | 110 |
| 03rbl.194 | 218 | 222 | 290 | 292 | 204 | 222 | 290 | 312 | 178 | 178 | 286 | 302 | 110 | 110 |
| 03rbl.196 | 224 | 248 | 282 | 282 | 212 | 212 | 260 | 288 | 184 | 216 | 276 | 296 | 110 | 110 |
| 03rbl.199 | 222 | 232 | 282 | 282 | 212 | 228 | 264 | 300 | 192 | 210 | 276 | 280 | 110 | 112 |
| 03rbl.209 | 214 | 224 | 290 | 292 | 212 | 216 | 288 | 300 | 170 | 178 | 282 | 288 | 110 | 110 |
| 03rbl.218 | 224 | 228 | 282 | 290 | 210 | 214 | 290 | 292 | 196 | 228 | 272 | 282 | 110 | 110 |
| 03rbl.220 | 214 | 214 | 282 | 286 | 210 | 218 | 272 | 300 | 222 | 222 | 296 | 296 | 110 | 112 |
| 03rbl.222 | 226 | 226 | 290 | 292 | 214 | 214 | 288 | 298 | 168 | 192 | 288 | 298 | 110 | 116 |
| 03rbl.224 | 218 | 226 | 290 | 292 | 214 | 214 | 286 | 302 | 186 | 216 | 282 | 290 | 110 | 112 |
| 03rbl.231 | 214 | 226 | 290 | 290 | 214 | 236 | 250 | 304 | 196 | 204 | 282 | 288 | 110 | 110 |
| 03rbl.232 | 214 | 226 | 282 | 290 | 210 | 214 | 286 | 298 | 168 | 190 | 290 | 298 | 110 | 116 |
| 03rbl.235 | 224 | 228 | 290 | 292 | 218 | 222 | 254 | 294 | 174 | 178 | 286 | 288 | 110 | 110 |
| 03rbl.236 | 226 | 226 | 282 | 288 | 212 | 220 | 290 | 298 | 196 | 208 | 262 | 294 | 110 | 110 |
| 03rbl.244 | 214 | 230 | 284 | 290 | 218 | 222 | 272 | 272 | 196 | 220 | 270 | 286 | 110 | 110 |
| 03rbl.250 | 214 | 214 | 282 | 290 | 212 | 220 | 256 | 278 | 196 | 216 | 294 | 306 | 110 | 110 |
| 03rbl.258 | 222 | 226 | 286 | 286 | 208 | 218 | 272 | 312 | 172 | 190 | 278 | 284 | 110 | 112 |
| 03rbl.259 | 214 | 222 | 282 | 290 | 214 | 218 | 286 | 292 | 190 | 208 | 276 | 286 | 110 | 110 |
| 03rbl.262 | 218 | 228 | 282 | 286 | 204 | 210 | 256 | 284 | 182 | 208 | 268 | 284 | 110 | 112 |
| 03rbl.264 | 214 | 224 | 290 | 290 | 214 | 222 | 252 | 272 | 190 | 192 | 272 | 278 | 110 | 110 |
| 03rbl.272 | 214 | 228 | 288 | 290 | 214 | 236 | 264 | 304 | 150 | 190 | 286 | 296 | 110 | 110 |

|           |     |     |     |     |     |     |     |     |     |     |     |     |     |     |
|-----------|-----|-----|-----|-----|-----|-----|-----|-----|-----|-----|-----|-----|-----|-----|
| 03rbl.273 | 226 | 226 | 282 | 288 | 202 | 222 | 250 | 274 | 186 | 200 | 270 | 274 | 110 | 112 |
| 03rbl.283 | 230 | 232 | 280 | 282 | 214 | 214 | 274 | 274 | 194 | 210 | 272 | 286 | 110 | 110 |
| 03rbl.284 | 224 | 224 | 288 | 290 | 202 | 210 | 252 | 292 | 170 | 186 | 286 | 298 | 110 | 114 |
| 03rbl.285 | 224 | 254 | 282 | 290 | 202 | 210 | 270 | 290 | 150 | 196 | 282 | 288 | 110 | 110 |
| 03rbl.294 | 224 | 232 | 282 | 284 | 214 | 214 | 254 | 270 | 172 | 204 | 282 | 282 | 110 | 110 |
| 03rbl.297 | 212 | 214 | 284 | 290 | 218 | 222 | 282 | 284 | 194 | 214 | 276 | 284 | 110 | 114 |
| 03rbl.298 | 232 | 240 | 286 | 290 | 214 | 216 | 272 | 286 | 0   | 0   | 278 | 282 | 110 | 110 |
| 03rbl.299 | 214 | 224 | 282 | 290 | 210 | 218 | 292 | 298 | 166 | 168 | 286 | 300 | 110 | 110 |
| 03rbl.305 | 230 | 238 | 282 | 284 | 214 | 220 | 274 | 290 | 194 | 216 | 274 | 286 | 110 | 112 |
| 03rbl.306 | 218 | 218 | 284 | 286 | 222 | 232 | 252 | 256 | 192 | 194 | 288 | 298 | 110 | 112 |
| 03rbl.307 | 214 | 214 | 282 | 286 | 218 | 222 | 254 | 258 | 188 | 198 | 280 | 288 | 110 | 110 |
| 03rbl.312 | 214 | 222 | 282 | 282 | 214 | 214 | 288 | 306 | 170 | 182 | 288 | 310 | 110 | 110 |
| 03rbl.316 | 212 | 222 | 286 | 290 | 222 | 236 | 280 | 292 | 178 | 180 | 272 | 288 | 110 | 110 |
| 03rbl.322 | 214 | 224 | 282 | 290 | 222 | 230 | 268 | 294 | 166 | 168 | 288 | 298 | 110 | 112 |
| 03rbl.325 | 214 | 214 | 282 | 290 | 220 | 222 | 252 | 288 | 158 | 208 | 276 | 298 | 110 | 110 |
| 03rbl.326 | 212 | 226 | 290 | 290 | 212 | 222 | 286 | 288 | 222 | 224 | 288 | 298 | 110 | 110 |
| 03rbl.327 | 214 | 224 | 282 | 288 | 204 | 218 | 272 | 288 | 196 | 208 | 268 | 282 | 112 | 114 |
| 03rbl.333 | 248 | 254 | 284 | 288 | 216 | 218 | 292 | 306 | 202 | 202 | 272 | 288 | 110 | 110 |
| 03rbl.334 | 222 | 230 | 282 | 288 | 210 | 218 | 272 | 272 | 166 | 166 | 288 | 294 | 110 | 112 |
| 03rbl.335 | 214 | 224 | 288 | 288 | 202 | 216 | 270 | 290 | 208 | 224 | 282 | 298 | 110 | 110 |
| 03rbl.337 | 224 | 226 | 282 | 292 | 214 | 218 | 302 | 312 | 168 | 202 | 288 | 300 | 110 | 110 |
| 03rbl.338 | 226 | 248 | 286 | 288 | 208 | 222 | 252 | 284 | 196 | 196 | 286 | 288 | 110 | 110 |
| 03rbl.340 | 218 | 226 | 286 | 290 | 216 | 222 | 258 | 282 | 194 | 200 | 278 | 284 | 110 | 110 |
| 03rbl.343 | 224 | 228 | 282 | 282 | 212 | 212 | 272 | 286 | 182 | 182 | 268 | 296 | 110 | 110 |
| 03rbl.349 | 224 | 226 | 284 | 286 | 218 | 230 | 272 | 282 | 192 | 204 | 270 | 278 | 110 | 112 |
| 03rbl.359 | 224 | 228 | 288 | 290 | 214 | 214 | 264 | 302 | 204 | 208 | 288 | 288 | 110 | 110 |
| 03rbl.372 | 218 | 222 | 282 | 290 | 214 | 214 | 288 | 290 | 168 | 168 | 290 | 290 | 110 | 110 |
| 04rbl.003 | 226 | 242 | 282 | 290 | 230 | 232 | 294 | 294 | 168 | 194 | 262 | 276 | 110 | 112 |
| 04rbl.005 | 214 | 228 | 290 | 292 | 212 | 214 | 272 | 286 | 202 | 220 | 270 | 292 | 110 | 110 |
| 04rbl.012 | 224 | 252 | 290 | 290 | 202 | 214 | 222 | 288 | 194 | 196 | 286 | 288 | 110 | 110 |
| 04rbl.017 | 214 | 224 | 286 | 290 | 212 | 218 | 286 | 304 | 170 | 218 | 264 | 286 | 110 | 110 |
| 04rbl.019 | 218 | 224 | 282 | 286 | 208 | 212 | 300 | 308 | 176 | 192 | 266 | 288 | 110 | 114 |
| 04rbl.028 | 226 | 242 | 282 | 286 | 214 | 232 | 256 | 274 | 172 | 204 | 282 | 286 | 110 | 112 |
| 04rbl.029 | 224 | 256 | 286 | 288 | 202 | 216 | 270 | 286 | 168 | 202 | 270 | 284 | 110 | 112 |
| 04rbl.031 | 224 | 250 | 286 | 286 | 214 | 218 | 280 | 286 | 170 | 208 | 284 | 286 | 110 | 110 |
| 04rbl.042 | 224 | 224 | 282 | 290 | 216 | 236 | 274 | 282 | 170 | 200 | 266 | 278 | 110 | 112 |
| 04rbl.047 | 224 | 224 | 290 | 290 | 214 | 218 | 260 | 294 | 168 | 170 | 272 | 294 | 110 | 110 |

|           |     |     |     |     |     |     |     |     |     |     |     |     |     |     |
|-----------|-----|-----|-----|-----|-----|-----|-----|-----|-----|-----|-----|-----|-----|-----|
| 04rbl.054 | 218 | 224 | 282 | 292 | 216 | 218 | 296 | 308 | 216 | 216 | 266 | 274 | 110 | 110 |
| 04rbl.060 | 224 | 226 | 288 | 288 | 218 | 236 | 286 | 304 | 168 | 202 | 278 | 296 | 110 | 110 |
| 04rbl.061 | 214 | 226 | 284 | 284 | 210 | 214 | 278 | 286 | 204 | 204 | 288 | 292 | 110 | 112 |
| 04rbl.064 | 214 | 224 | 288 | 288 | 214 | 218 | 264 | 292 | 172 | 174 | 276 | 288 | 112 | 112 |
| 04rbl.065 | 212 | 224 | 286 | 292 | 218 | 232 | 264 | 272 | 174 | 220 | 276 | 280 | 110 | 112 |
| 04rbl.066 | 218 | 222 | 290 | 290 | 210 | 212 | 274 | 276 | 168 | 170 | 284 | 288 | 110 | 110 |
| 04rbl.068 | 212 | 226 | 286 | 292 | 218 | 222 | 288 | 312 | 198 | 202 | 290 | 292 | 110 | 112 |
| 04rbl.081 | 218 | 228 | 282 | 292 | 212 | 216 | 264 | 288 | 166 | 184 | 270 | 280 | 110 | 110 |
| 04rbl.086 | 212 | 226 | 290 | 290 | 202 | 214 | 272 | 286 | 178 | 208 | 266 | 278 | 110 | 110 |
| 04rbl.088 | 214 | 224 | 282 | 284 | 210 | 214 | 266 | 290 | 170 | 192 | 274 | 296 | 110 | 110 |
| 04rbl.091 | 222 | 224 | 282 | 292 | 216 | 218 | 274 | 312 | 190 | 190 | 272 | 276 | 110 | 110 |
| 04rbl.094 | 222 | 222 | 282 | 286 | 214 | 220 | 252 | 288 | 150 | 194 | 290 | 292 | 110 | 112 |
| 04rbl.097 | 222 | 224 | 280 | 282 | 212 | 218 | 286 | 292 | 150 | 174 | 286 | 288 | 110 | 110 |
| 04rbl.100 | 224 | 226 | 282 | 286 | 210 | 216 | 284 | 288 | 224 | 226 | 264 | 286 | 112 | 114 |
| 04rbl.107 | 218 | 226 | 282 | 282 | 212 | 216 | 264 | 294 | 170 | 170 | 276 | 294 | 110 | 110 |
| 04rbl.118 | 224 | 230 | 286 | 290 | 218 | 218 | 290 | 310 | 194 | 210 | 284 | 288 | 110 | 110 |
| 04rbl.121 | 224 | 224 | 290 | 290 | 214 | 218 | 264 | 284 | 166 | 176 | 270 | 278 | 110 | 110 |
| 04rbl.126 | 212 | 212 | 280 | 280 | 210 | 214 | 296 | 302 | 170 | 218 | 266 | 270 | 110 | 110 |
| 04rbl.132 | 224 | 234 | 286 | 290 | 202 | 210 | 280 | 282 | 170 | 200 | 288 | 290 | 110 | 110 |
| 04rbl.137 | 222 | 228 | 282 | 290 | 212 | 214 | 298 | 300 | 168 | 212 | 274 | 282 | 110 | 110 |
| 04rbl.151 | 226 | 230 | 284 | 286 | 218 | 232 | 270 | 288 | 196 | 196 | 284 | 286 | 110 | 112 |
| 04rbl.152 | 224 | 254 | 284 | 290 | 210 | 214 | 260 | 286 | 168 | 212 | 282 | 286 | 110 | 110 |
| 04rbl.154 | 224 | 230 | 284 | 292 | 218 | 230 | 222 | 288 | 190 | 214 | 270 | 282 | 110 | 110 |
| 04rbl.160 | 214 | 224 | 282 | 292 | 222 | 222 | 252 | 262 | 176 | 206 | 288 | 290 | 110 | 112 |
| 04rbl.161 | 214 | 224 | 286 | 290 | 214 | 214 | 260 | 314 | 170 | 172 | 276 | 296 | 110 | 112 |
| 04rbl.164 | 222 | 224 | 282 | 282 | 210 | 214 | 276 | 296 | 174 | 176 | 284 | 290 | 110 | 110 |
| 04rbl.176 | 226 | 244 | 284 | 284 | 218 | 218 | 258 | 288 | 150 | 174 | 284 | 284 | 110 | 110 |
| 04rbl.177 | 214 | 226 | 286 | 288 | 216 | 218 | 274 | 292 | 196 | 206 | 284 | 284 | 110 | 112 |
| 04rbl.186 | 224 | 226 | 280 | 280 | 218 | 218 | 280 | 292 | 190 | 198 | 270 | 286 | 110 | 110 |
| 04rbl.190 | 244 | 244 | 282 | 290 | 212 | 214 | 256 | 264 | 170 | 192 | 284 | 294 | 110 | 110 |
| 04rbl.195 | 214 | 214 | 288 | 288 | 222 | 222 | 292 | 292 | 176 | 210 | 286 | 300 | 110 | 112 |
| 04rbl.201 | 226 | 228 | 282 | 286 | 218 | 228 | 252 | 290 | 150 | 150 | 284 | 296 | 110 | 110 |
| 04rbl.202 | 224 | 224 | 282 | 288 | 214 | 222 | 254 | 304 | 170 | 204 | 262 | 278 | 110 | 110 |
| 04rbl.205 | 214 | 222 | 286 | 288 | 218 | 218 | 296 | 302 | 170 | 224 | 288 | 296 | 110 | 112 |
| 04rbl.209 | 214 | 224 | 282 | 286 | 214 | 222 | 254 | 284 | 170 | 204 | 286 | 296 | 110 | 110 |
| 04rbl.210 | 228 | 244 | 290 | 292 | 208 | 222 | 274 | 276 | 178 | 196 | 282 | 282 | 110 | 112 |
| 04rbl.216 | 222 | 224 | 292 | 292 | 214 | 222 | 254 | 304 | 204 | 210 | 280 | 288 | 110 | 110 |

|           |     |     |     |     |     |     |     |     |     |     |     |     |     |     |
|-----------|-----|-----|-----|-----|-----|-----|-----|-----|-----|-----|-----|-----|-----|-----|
| 04rbl.220 | 224 | 228 | 282 | 282 | 212 | 218 | 290 | 300 | 216 | 218 | 264 | 276 | 110 | 112 |
| 04rbl.221 | 214 | 226 | 282 | 284 | 212 | 214 | 286 | 286 | 170 | 190 | 282 | 288 | 110 | 110 |
| 04rbl.224 | 212 | 228 | 284 | 286 | 222 | 228 | 268 | 286 | 200 | 204 | 270 | 270 | 110 | 110 |
| 04rbl.226 | 222 | 232 | 286 | 286 | 218 | 222 | 266 | 290 | 150 | 172 | 278 | 286 | 110 | 110 |
| 04rbl.228 | 220 | 224 | 282 | 288 | 210 | 214 | 272 | 298 | 192 | 202 | 272 | 288 | 110 | 110 |
| 04rbl.233 | 222 | 246 | 286 | 288 | 210 | 214 | 274 | 300 | 170 | 172 | 262 | 288 | 110 | 112 |
| 04rbl.237 | 224 | 230 | 282 | 286 | 212 | 214 | 290 | 304 | 202 | 202 | 268 | 270 | 110 | 110 |
| 04rbl.246 | 214 | 222 | 286 | 290 | 202 | 218 | 280 | 288 | 174 | 180 | 290 | 302 | 110 | 114 |
| 04rbl.249 | 212 | 254 | 282 | 290 | 212 | 214 | 280 | 282 | 192 | 210 | 300 | 302 | 110 | 110 |
| 04rbl.255 | 214 | 224 | 286 | 292 | 208 | 218 | 298 | 314 | 176 | 204 | 286 | 288 | 110 | 114 |
| 04rbl.266 | 236 | 242 | 286 | 286 | 222 | 232 | 276 | 300 | 178 | 184 | 278 | 284 | 110 | 114 |
| 04rbl.267 | 212 | 222 | 288 | 290 | 214 | 214 | 288 | 312 | 170 | 222 | 290 | 300 | 110 | 112 |
| 04rbl.272 | 228 | 228 | 282 | 286 | 212 | 222 | 274 | 292 | 150 | 192 | 300 | 304 | 110 | 112 |
| 04rbl.277 | 216 | 224 | 286 | 290 | 204 | 222 | 274 | 292 | 176 | 206 | 286 | 294 | 110 | 110 |
| 04rbl.279 | 216 | 224 | 290 | 290 | 212 | 232 | 292 | 298 | 194 | 194 | 276 | 298 | 110 | 112 |
| 04rbl.294 | 224 | 232 | 282 | 282 | 210 | 230 | 262 | 300 | 168 | 206 | 276 | 284 | 110 | 110 |
| 04rbl.297 | 224 | 226 | 282 | 282 | 214 | 214 | 298 | 308 | 196 | 214 | 296 | 300 | 110 | 114 |
| 04rbl.298 | 224 | 224 | 282 | 284 | 214 | 214 | 260 | 274 | 196 | 216 | 264 | 302 | 110 | 110 |
| 04rbl.300 | 224 | 230 | 280 | 288 | 214 | 230 | 296 | 300 | 150 | 150 | 276 | 294 | 110 | 112 |
| 04rbl.303 | 214 | 226 | 290 | 290 | 214 | 222 | 292 | 308 | 150 | 214 | 282 | 286 | 110 | 110 |
| 04rbl.306 | 224 | 226 | 282 | 284 | 214 | 214 | 260 | 308 | 174 | 214 | 264 | 290 | 110 | 114 |
| 04rbl.307 | 224 | 224 | 284 | 290 | 214 | 218 | 258 | 260 | 194 | 216 | 262 | 274 | 110 | 110 |
| 04rbl.312 | 224 | 232 | 290 | 290 | 208 | 218 | 284 | 294 | 168 | 170 | 280 | 298 | 110 | 112 |
| 04rbl.313 | 214 | 224 | 282 | 284 | 204 | 214 | 272 | 286 | 168 | 204 | 280 | 286 | 110 | 110 |
| 04rbl.316 | 212 | 224 | 282 | 290 | 214 | 222 | 290 | 304 | 150 | 222 | 272 | 274 | 110 | 114 |
| 04rbl.317 | 218 | 224 | 280 | 288 | 212 | 214 | 288 | 290 | 168 | 168 | 274 | 292 | 112 | 114 |
| 04rbl.330 | 224 | 226 | 280 | 284 | 212 | 218 | 284 | 294 | 162 | 172 | 280 | 288 | 110 | 110 |
| 04rbl.339 | 218 | 224 | 280 | 280 | 210 | 212 | 252 | 254 | 190 | 202 | 288 | 290 | 110 | 110 |
| 04rbl.345 | 214 | 224 | 282 | 286 | 210 | 218 | 252 | 280 | 172 | 212 | 282 | 292 | 110 | 110 |
| 04rbl.346 | 212 | 224 | 282 | 282 | 210 | 212 | 250 | 274 | 192 | 212 | 290 | 294 | 110 | 112 |
| 04rbl.348 | 224 | 226 | 282 | 292 | 208 | 214 | 264 | 288 | 204 | 204 | 280 | 288 | 110 | 110 |
| 04rbl.355 | 214 | 226 | 282 | 282 | 202 | 214 | 276 | 286 | 204 | 208 | 288 | 292 | 110 | 110 |
| 04rbl.358 | 214 | 224 | 286 | 290 | 210 | 214 | 284 | 290 | 198 | 224 | 284 | 286 | 110 | 110 |
| 04rbl.368 | 224 | 226 | 288 | 288 | 214 | 220 | 252 | 254 | 210 | 210 | 282 | 296 | 110 | 110 |
| 04rbl.371 | 226 | 254 | 282 | 284 | 216 | 220 | 260 | 276 | 184 | 206 | 266 | 292 | 110 | 112 |
| 04rbl.383 | 214 | 226 | 280 | 280 | 202 | 208 | 256 | 274 | 150 | 176 | 288 | 292 | 110 | 110 |
| 04rbl.384 | 224 | 226 | 280 | 288 | 214 | 222 | 292 | 300 | 170 | 214 | 266 | 276 | 110 | 110 |

|           |     |     |     |     |     |     |     |     |     |     |     |     |     |     |
|-----------|-----|-----|-----|-----|-----|-----|-----|-----|-----|-----|-----|-----|-----|-----|
| 04rbl.388 | 224 | 236 | 282 | 284 | 208 | 214 | 274 | 308 | 170 | 210 | 284 | 286 | 110 | 112 |
| 04rbl.390 | 220 | 252 | 280 | 286 | 212 | 214 | 272 | 276 | 170 | 194 | 266 | 288 | 110 | 112 |
| 04rbl.400 | 222 | 226 | 282 | 286 | 214 | 236 | 272 | 296 | 150 | 208 | 288 | 300 | 110 | 110 |
| 04rbl.404 | 242 | 258 | 284 | 284 | 212 | 214 | 272 | 286 | 162 | 198 | 276 | 298 | 110 | 112 |
| 04rbl.409 | 236 | 236 | 286 | 288 | 212 | 222 | 254 | 292 | 150 | 188 | 272 | 280 | 110 | 114 |
| 04rbl.425 | 212 | 232 | 286 | 288 | 202 | 204 | 278 | 310 | 196 | 224 | 274 | 274 | 110 | 110 |
| 04rbl.433 | 214 | 242 | 280 | 280 | 216 | 216 | 292 | 296 | 170 | 202 | 266 | 284 | 110 | 112 |
| 04rbl.441 | 224 | 250 | 280 | 288 | 216 | 222 | 274 | 288 | 170 | 172 | 286 | 288 | 110 | 112 |
| 04rbl.443 | 224 | 236 | 288 | 288 | 214 | 218 | 286 | 296 | 192 | 216 | 276 | 282 | 110 | 110 |
| 04rbl.446 | 214 | 222 | 280 | 286 | 214 | 216 | 272 | 272 | 170 | 208 | 268 | 286 | 110 | 110 |
| 04rbl.463 | 214 | 214 | 280 | 288 | 214 | 220 | 274 | 282 | 196 | 196 | 288 | 294 | 110 | 110 |
| 04rbl.464 | 218 | 224 | 290 | 290 | 208 | 214 | 214 | 214 | 200 | 200 | 284 | 300 | 112 | 112 |
| 04rbl.471 | 212 | 216 | 282 | 282 | 210 | 216 | 272 | 276 | 170 | 204 | 300 | 300 | 112 | 114 |
| 04rbl.472 | 214 | 222 | 282 | 288 | 214 | 214 | 272 | 272 | 172 | 226 | 268 | 276 | 110 | 110 |
| 04rbl.473 | 224 | 226 | 282 | 286 | 212 | 214 | 288 | 300 | 178 | 178 | 286 | 308 | 110 | 110 |
| 04rbl.474 | 214 | 224 | 286 | 290 | 212 | 222 | 288 | 302 | 206 | 216 | 274 | 288 | 110 | 110 |
| 04rbl.477 | 214 | 224 | 282 | 282 | 208 | 214 | 216 | 292 | 162 | 214 | 278 | 284 | 110 | 110 |
| 04rbl.480 | 214 | 224 | 290 | 290 | 208 | 210 | 270 | 298 | 168 | 196 | 284 | 294 | 110 | 112 |
| 04rbl.483 | 214 | 222 | 290 | 290 | 210 | 214 | 296 | 298 | 192 | 202 | 280 | 290 | 110 | 112 |
| 04rbl.484 | 226 | 226 | 284 | 288 | 220 | 222 | 256 | 284 | 166 | 170 | 284 | 298 | 110 | 110 |
| 04rbl.485 | 212 | 228 | 290 | 290 | 208 | 214 | 264 | 274 | 168 | 192 | 280 | 292 | 110 | 110 |
| 04rbl.491 | 214 | 246 | 282 | 286 | 212 | 220 | 286 | 286 | 150 | 186 | 286 | 296 | 110 | 112 |
| 04rbl.492 | 214 | 224 | 282 | 282 | 214 | 216 | 274 | 276 | 184 | 194 | 276 | 290 | 110 | 110 |
| 04rbl.493 | 214 | 232 | 282 | 290 | 222 | 236 | 270 | 282 | 188 | 192 | 282 | 284 | 110 | 110 |
| 04rbl.494 | 222 | 226 | 280 | 280 | 204 | 210 | 298 | 300 | 168 | 192 | 266 | 282 | 110 | 112 |
| 04rbl.495 | 224 | 228 | 288 | 290 | 212 | 214 | 256 | 288 | 170 | 204 | 292 | 296 | 110 | 112 |
| 04rbl.499 | 214 | 232 | 282 | 292 | 214 | 214 | 260 | 274 | 170 | 176 | 286 | 286 | 110 | 110 |
| 04rbl.502 | 224 | 224 | 280 | 280 | 218 | 226 | 286 | 292 | 178 | 178 | 282 | 290 | 110 | 110 |
| 04rbl.506 | 224 | 244 | 286 | 286 | 216 | 218 | 284 | 288 | 202 | 202 | 300 | 300 | 110 | 110 |
| 04rbl.519 | 218 | 226 | 290 | 290 | 214 | 218 | 286 | 288 | 196 | 216 | 274 | 284 | 110 | 110 |
| 04rbl.539 | 218 | 228 | 282 | 286 | 214 | 218 | 252 | 274 | 202 | 204 | 270 | 278 | 110 | 112 |
| 04rbl.545 | 212 | 224 | 282 | 282 | 214 | 222 | 280 | 294 | 196 | 208 | 286 | 290 | 110 | 110 |
| 04rbl.546 | 226 | 246 | 282 | 286 | 218 | 236 | 294 | 310 | 206 | 210 | 288 | 296 | 110 | 110 |
| 04rbl.550 | 224 | 228 | 282 | 286 | 210 | 218 | 290 | 296 | 170 | 202 | 270 | 288 | 110 | 110 |
| 04rbl.551 | 228 | 248 | 286 | 286 | 218 | 218 | 268 | 268 | 204 | 210 | 272 | 304 | 110 | 110 |
| 04rbl.556 | 214 | 246 | 282 | 282 | 214 | 218 | 286 | 296 | 198 | 204 | 284 | 288 | 110 | 110 |
| 05rbl.005 | 224 | 254 | 290 | 290 | 214 | 230 | 250 | 296 | 150 | 170 | 276 | 298 | 110 | 110 |

|           |     |     |     |     |     |     |     |     |     |     |     |     |     |     |
|-----------|-----|-----|-----|-----|-----|-----|-----|-----|-----|-----|-----|-----|-----|-----|
| 05rbl.009 | 214 | 224 | 290 | 290 | 214 | 218 | 258 | 280 | 168 | 176 | 270 | 294 | 112 | 112 |
| 05rbl.014 | 218 | 222 | 286 | 288 | 212 | 216 | 274 | 294 | 190 | 202 | 280 | 290 | 110 | 112 |
| 05rbl.022 | 218 | 224 | 282 | 290 | 212 | 218 | 254 | 278 | 196 | 196 | 274 | 292 | 110 | 110 |
| 05rbl.030 | 222 | 226 | 282 | 282 | 208 | 214 | 250 | 278 | 170 | 216 | 276 | 288 | 110 | 110 |
| 05rbl.033 | 230 | 232 | 282 | 284 | 218 | 222 | 288 | 304 | 150 | 202 | 298 | 304 | 110 | 114 |
| 05rbl.043 | 212 | 224 | 288 | 290 | 212 | 214 | 282 | 300 | 204 | 204 | 274 | 298 | 110 | 110 |
| 05rbl.044 | 214 | 224 | 280 | 292 | 204 | 214 | 290 | 290 | 150 | 216 | 280 | 284 | 110 | 110 |
| 05rbl.045 | 226 | 232 | 284 | 286 | 202 | 222 | 298 | 300 | 204 | 212 | 276 | 296 | 110 | 114 |
| 05rbl.053 | 230 | 232 | 282 | 282 | 208 | 218 | 288 | 304 | 150 | 202 | 296 | 302 | 110 | 114 |
| 05rbl.056 | 212 | 246 | 284 | 292 | 208 | 210 | 274 | 310 | 188 | 202 | 282 | 306 | 110 | 110 |
| 05rbl.058 | 224 | 254 | 280 | 286 | 214 | 214 | 264 | 284 | 170 | 178 | 272 | 280 | 110 | 110 |
| 05rbl.059 | 220 | 226 | 284 | 290 | 210 | 212 | 286 | 312 | 190 | 200 | 284 | 288 | 110 | 110 |
| 05rbl.061 | 214 | 232 | 284 | 292 | 212 | 214 | 252 | 296 | 174 | 174 | 280 | 294 | 110 | 114 |
| 05rbl.063 | 214 | 232 | 282 | 286 | 214 | 216 | 220 | 304 | 170 | 200 | 286 | 292 | 110 | 110 |
| 05rbl.065 | 228 | 228 | 290 | 292 | 216 | 218 | 272 | 282 | 172 | 200 | 286 | 294 | 110 | 110 |
| 05rbl.073 | 224 | 224 | 282 | 286 | 216 | 218 | 272 | 294 | 216 | 218 | 298 | 302 | 110 | 110 |
| 05rbl.078 | 222 | 224 | 280 | 286 | 202 | 214 | 266 | 274 | 194 | 204 | 288 | 294 | 110 | 110 |
| 05rbl.080 | 222 | 222 | 282 | 284 | 212 | 214 | 264 | 284 | 194 | 194 | 292 | 304 | 110 | 110 |
| 05rbl.081 | 222 | 252 | 282 | 288 | 218 | 218 | 262 | 290 | 188 | 212 | 276 | 286 | 110 | 110 |
| 05rbl.082 | 224 | 236 | 282 | 286 | 212 | 214 | 270 | 286 | 150 | 196 | 282 | 286 | 110 | 110 |
| 05rbl.083 | 224 | 224 | 286 | 286 | 210 | 212 | 272 | 274 | 150 | 202 | 280 | 280 | 110 | 110 |
| 05rbl.086 | 226 | 252 | 282 | 284 | 214 | 218 | 286 | 304 | 204 | 204 | 268 | 292 | 110 | 110 |
| 05rbl.090 | 224 | 244 | 284 | 290 | 214 | 214 | 282 | 294 | 168 | 216 | 268 | 288 | 110 | 110 |
| 05rbl.096 | 224 | 226 | 288 | 288 | 208 | 214 | 286 | 292 | 170 | 192 | 266 | 282 | 110 | 112 |
| 05rbl.099 | 224 | 228 | 282 | 284 | 214 | 236 | 286 | 296 | 170 | 196 | 280 | 282 | 110 | 110 |
| 05rbl.102 | 222 | 244 | 284 | 290 | 214 | 222 | 248 | 272 | 162 | 194 | 276 | 286 | 112 | 112 |
| 05rbl.108 | 214 | 226 | 284 | 292 | 212 | 218 | 260 | 288 | 208 | 208 | 298 | 304 | 110 | 110 |
| 05rbl.109 | 226 | 232 | 280 | 282 | 208 | 218 | 286 | 300 | 208 | 224 | 286 | 292 | 110 | 110 |
| 05rbl.117 | 212 | 218 | 286 | 290 | 202 | 214 | 294 | 294 | 150 | 162 | 290 | 296 | 110 | 110 |
| 05rbl.120 | 212 | 248 | 284 | 290 | 210 | 214 | 274 | 304 | 170 | 170 | 270 | 276 | 110 | 110 |
| 05rbl.121 | 218 | 224 | 290 | 290 | 216 | 226 | 268 | 298 | 200 | 208 | 274 | 288 | 110 | 110 |
| 05rbl.122 | 212 | 236 | 282 | 284 | 202 | 216 | 286 | 298 | 150 | 196 | 282 | 282 | 110 | 110 |
| 05rbl.123 | 212 | 214 | 282 | 284 | 212 | 216 | 272 | 300 | 170 | 170 | 288 | 290 | 110 | 110 |
| 05rbl.128 | 224 | 248 | 282 | 284 | 216 | 222 | 280 | 288 | 168 | 204 | 278 | 294 | 110 | 112 |
| 05rbl.134 | 214 | 248 | 286 | 290 | 214 | 216 | 300 | 300 | 150 | 198 | 266 | 286 | 110 | 110 |
| 05rbl.140 | 222 | 224 | 282 | 284 | 212 | 222 | 252 | 288 | 198 | 224 | 266 | 266 | 110 | 110 |
| 05rbl.144 | 214 | 258 | 282 | 290 | 212 | 214 | 274 | 292 | 214 | 214 | 282 | 296 | 110 | 110 |

|           |     |     |     |     |     |     |     |     |     |     |     |     |     |     |
|-----------|-----|-----|-----|-----|-----|-----|-----|-----|-----|-----|-----|-----|-----|-----|
| 05rbl.146 | 226 | 248 | 282 | 290 | 210 | 214 | 246 | 260 | 192 | 206 | 288 | 296 | 110 | 110 |
| 05rbl.147 | 214 | 224 | 286 | 286 | 214 | 218 | 266 | 294 | 208 | 220 | 284 | 286 | 110 | 112 |
| 05rbl.148 | 214 | 224 | 280 | 288 | 210 | 212 | 284 | 292 | 168 | 192 | 294 | 300 | 110 | 110 |
| 05rbl.149 | 214 | 224 | 282 | 290 | 214 | 214 | 272 | 298 | 194 | 196 | 288 | 290 | 110 | 110 |
| 05rbl.152 | 224 | 232 | 280 | 282 | 218 | 236 | 256 | 258 | 216 | 216 | 278 | 298 | 110 | 110 |
| 05rbl.154 | 216 | 226 | 282 | 290 | 210 | 212 | 298 | 304 | 190 | 202 | 266 | 278 | 110 | 110 |
| 05rbl.155 | 218 | 222 | 282 | 292 | 204 | 212 | 264 | 300 | 200 | 200 | 296 | 298 | 110 | 110 |
| 05rbl.156 | 212 | 220 | 290 | 292 | 212 | 214 | 264 | 300 | 180 | 208 | 284 | 300 | 110 | 110 |
| 05rbl.163 | 224 | 230 | 284 | 290 | 218 | 232 | 268 | 312 | 194 | 212 | 284 | 290 | 110 | 110 |
| 05rbl.164 | 252 | 258 | 290 | 292 | 218 | 222 | 256 | 304 | 208 | 212 | 284 | 286 | 110 | 110 |
| 05rbl.175 | 214 | 230 | 284 | 288 | 214 | 218 | 286 | 290 | 196 | 202 | 288 | 288 | 110 | 112 |
| 05rbl.180 | 212 | 224 | 282 | 286 | 214 | 214 | 280 | 298 | 182 | 196 | 272 | 272 | 110 | 110 |
| 05rbl.181 | 216 | 216 | 290 | 290 | 236 | 236 | 292 | 310 | 194 | 204 | 284 | 284 | 110 | 112 |
| 05rbl.183 | 226 | 254 | 282 | 288 | 210 | 232 | 270 | 282 | 212 | 212 | 284 | 288 | 110 | 110 |
| 05rbl.187 | 226 | 226 | 282 | 290 | 218 | 230 | 256 | 314 | 184 | 192 | 274 | 284 | 110 | 110 |
| 05rbl.190 | 224 | 244 | 286 | 286 | 210 | 214 | 256 | 282 | 172 | 216 | 284 | 286 | 110 | 110 |
| 05rbl.192 | 224 | 226 | 286 | 302 | 208 | 222 | 274 | 284 | 180 | 196 | 272 | 284 | 110 | 110 |
| 05rbl.198 | 218 | 224 | 284 | 292 | 208 | 218 | 268 | 314 | 194 | 204 | 266 | 270 | 110 | 110 |
| 05rbl.200 | 224 | 246 | 282 | 286 | 214 | 218 | 256 | 300 | 192 | 192 | 268 | 294 | 110 | 110 |
| 05rbl.201 | 226 | 226 | 284 | 286 | 216 | 218 | 310 | 312 | 192 | 216 | 274 | 284 | 110 | 110 |
| 05rbl.202 | 218 | 222 | 290 | 290 | 214 | 216 | 288 | 296 | 192 | 196 | 294 | 296 | 110 | 110 |
| 05rbl.206 | 224 | 228 | 284 | 292 | 214 | 214 | 296 | 300 | 184 | 196 | 290 | 296 | 110 | 110 |
| 05rbl.210 | 214 | 222 | 282 | 282 | 204 | 218 | 286 | 304 | 170 | 202 | 266 | 292 | 110 | 112 |
| 05rbl.211 | 218 | 248 | 284 | 286 | 214 | 222 | 258 | 292 | 150 | 214 | 288 | 290 | 110 | 114 |
| 05rbl.212 | 222 | 224 | 290 | 290 | 212 | 214 | 254 | 304 | 174 | 178 | 266 | 288 | 110 | 114 |
| 05rbl.215 | 222 | 232 | 282 | 282 | 210 | 218 | 254 | 274 | 170 | 198 | 268 | 276 | 110 | 112 |
| 05rbl.216 | 214 | 252 | 282 | 290 | 214 | 222 | 288 | 298 | 166 | 204 | 282 | 286 | 110 | 110 |
| 05rbl.220 | 212 | 218 | 288 | 290 | 212 | 218 | 266 | 286 | 170 | 196 | 290 | 294 | 110 | 112 |
| 05rbl.222 | 214 | 224 | 288 | 288 | 222 | 230 | 288 | 290 | 202 | 204 | 270 | 280 | 110 | 110 |
| 05rbl.223 | 214 | 224 | 282 | 286 | 202 | 218 | 286 | 286 | 190 | 202 | 268 | 280 | 110 | 112 |
| 05rbl.226 | 238 | 238 | 288 | 290 | 214 | 214 | 286 | 298 | 170 | 170 | 274 | 290 | 110 | 114 |
| 05rbl.233 | 222 | 224 | 280 | 280 | 222 | 228 | 266 | 278 | 198 | 214 | 286 | 286 | 110 | 112 |
| 05rbl.241 | 216 | 218 | 282 | 282 | 204 | 204 | 272 | 286 | 192 | 202 | 284 | 284 | 110 | 112 |
| 05rbl.242 | 214 | 224 | 286 | 290 | 210 | 214 | 300 | 310 | 180 | 204 | 280 | 292 | 110 | 110 |
| 05rbl.268 | 224 | 228 | 284 | 290 | 214 | 214 | 286 | 298 | 216 | 216 | 294 | 300 | 110 | 110 |
| 05rbl.270 | 224 | 230 | 282 | 286 | 212 | 214 | 286 | 288 | 170 | 192 | 286 | 308 | 110 | 110 |
| 05rbl.272 | 214 | 232 | 288 | 288 | 214 | 222 | 270 | 292 | 178 | 196 | 270 | 274 | 110 | 110 |

|           |     |     |     |     |     |     |     |     |     |     |     |     |     |     |
|-----------|-----|-----|-----|-----|-----|-----|-----|-----|-----|-----|-----|-----|-----|-----|
| 05rbl.273 | 224 | 228 | 282 | 286 | 210 | 214 | 270 | 296 | 206 | 206 | 276 | 294 | 110 | 114 |
| 05rbl.275 | 226 | 232 | 282 | 290 | 208 | 218 | 286 | 294 | 150 | 162 | 276 | 290 | 110 | 114 |
| 05rbl.284 | 224 | 224 | 284 | 290 | 214 | 218 | 256 | 260 | 150 | 214 | 262 | 276 | 110 | 110 |
| 05rbl.297 | 214 | 230 | 284 | 284 | 212 | 218 | 286 | 286 | 192 | 202 | 282 | 284 | 110 | 110 |
| 05rbl.298 | 216 | 224 | 284 | 284 | 210 | 216 | 280 | 294 | 208 | 208 | 288 | 288 | 114 | 114 |
| 05rbl.301 | 214 | 226 | 282 | 288 | 214 | 220 | 280 | 298 | 204 | 212 | 274 | 282 | 110 | 110 |
| 05rbl.302 | 222 | 222 | 286 | 290 | 214 | 236 | 282 | 292 | 170 | 192 | 282 | 298 | 110 | 110 |
| 05rbl.305 | 214 | 242 | 284 | 292 | 222 | 222 | 274 | 294 | 170 | 170 | 274 | 286 | 110 | 110 |
| 05rbl.306 | 222 | 228 | 284 | 286 | 204 | 214 | 272 | 294 | 194 | 202 | 268 | 296 | 110 | 110 |
| 05rbl.313 | 224 | 232 | 280 | 290 | 214 | 230 | 272 | 294 | 190 | 198 | 276 | 300 | 110 | 112 |
| 05rbl.314 | 226 | 250 | 284 | 290 | 214 | 218 | 274 | 294 | 150 | 170 | 270 | 274 | 110 | 110 |
| 05rbl.316 | 0   | 0   | 280 | 280 | 210 | 216 | 280 | 310 | 192 | 194 | 268 | 288 | 110 | 110 |
| 05rbl.320 | 222 | 230 | 284 | 286 | 214 | 216 | 254 | 284 | 168 | 170 | 274 | 292 | 110 | 112 |
| 05rbl.322 | 222 | 222 | 282 | 286 | 210 | 212 | 272 | 290 | 202 | 202 | 272 | 288 | 110 | 110 |
| 05rbl.324 | 212 | 214 | 284 | 286 | 214 | 222 | 272 | 314 | 0   | 0   | 274 | 284 | 110 | 114 |
| 05rbl.329 | 220 | 254 | 282 | 282 | 212 | 218 | 288 | 288 | 168 | 168 | 278 | 286 | 110 | 112 |
| 05rbl.331 | 214 | 238 | 290 | 290 | 202 | 214 | 272 | 282 | 170 | 222 | 286 | 288 | 110 | 110 |
| 05rbl.334 | 214 | 222 | 286 | 292 | 214 | 218 | 282 | 308 | 198 | 198 | 274 | 286 | 110 | 110 |
| 05rbl.343 | 226 | 248 | 284 | 286 | 214 | 218 | 294 | 306 | 168 | 176 | 266 | 288 | 110 | 110 |
| 05rbl.345 | 224 | 226 | 292 | 292 | 212 | 212 | 278 | 288 | 172 | 174 | 284 | 296 | 110 | 114 |
| 05rbl.349 | 224 | 226 | 288 | 290 | 204 | 212 | 274 | 298 | 198 | 198 | 290 | 298 | 110 | 112 |
| 05rbl.350 | 214 | 214 | 284 | 294 | 214 | 222 | 288 | 300 | 168 | 194 | 280 | 292 | 110 | 114 |
| 05rbl.351 | 214 | 232 | 284 | 284 | 218 | 218 | 278 | 296 | 170 | 170 | 280 | 298 | 110 | 110 |
| 05rbl.357 | 224 | 228 | 288 | 292 | 214 | 236 | 256 | 260 | 168 | 196 | 284 | 294 | 110 | 112 |
| 05rbl.362 | 222 | 224 | 288 | 288 | 210 | 222 | 282 | 290 | 196 | 196 | 288 | 292 | 110 | 110 |
| 05rbl.366 | 212 | 244 | 288 | 290 | 214 | 216 | 286 | 312 | 170 | 214 | 266 | 276 | 110 | 110 |
| 05rbl.367 | 216 | 226 | 284 | 288 | 214 | 216 | 290 | 314 | 176 | 202 | 282 | 284 | 114 | 114 |
| 05rbl.369 | 214 | 224 | 282 | 290 | 206 | 212 | 282 | 296 | 192 | 200 | 280 | 284 | 110 | 110 |
| 05rbl.370 | 224 | 230 | 282 | 286 | 204 | 208 | 252 | 294 | 190 | 226 | 280 | 284 | 110 | 110 |
| 05rbl.373 | 224 | 248 | 286 | 290 | 208 | 214 | 272 | 290 | 190 | 196 | 280 | 286 | 110 | 110 |
| 05rbl.377 | 214 | 214 | 282 | 288 | 214 | 214 | 254 | 276 | 150 | 170 | 288 | 292 | 110 | 110 |
| 05rbl.387 | 222 | 224 | 284 | 286 | 208 | 210 | 274 | 296 | 196 | 224 | 280 | 286 | 110 | 110 |
| 05rbl.390 | 226 | 226 | 290 | 290 | 214 | 222 | 274 | 274 | 196 | 196 | 276 | 282 | 110 | 112 |
| 05rbl.395 | 218 | 232 | 284 | 294 | 214 | 218 | 270 | 306 | 170 | 202 | 288 | 292 | 110 | 110 |
| 05rbl.398 | 224 | 224 | 290 | 290 | 218 | 230 | 278 | 296 | 174 | 174 | 282 | 282 | 112 | 112 |
| 05rbl.407 | 224 | 224 | 282 | 290 | 214 | 236 | 276 | 282 | 200 | 202 | 268 | 304 | 110 | 110 |
| 05rbl.408 | 214 | 218 | 288 | 288 | 210 | 226 | 284 | 300 | 178 | 204 | 286 | 300 | 110 | 110 |



|           |     |     |     |     |     |     |     |     |     |     |     |     |     |     |
|-----------|-----|-----|-----|-----|-----|-----|-----|-----|-----|-----|-----|-----|-----|-----|
| 05rbl.409 | 214 | 216 | 282 | 282 | 218 | 218 | 272 | 282 | 168 | 168 | 284 | 288 | 110 | 112 |
| 05rbl.414 | 220 | 224 | 282 | 282 | 214 | 218 | 286 | 286 | 168 | 204 | 288 | 290 | 110 | 112 |
| 05rbl.415 | 214 | 214 | 286 | 290 | 214 | 216 | 284 | 298 | 202 | 220 | 274 | 278 | 110 | 110 |
| 05rbl.416 | 224 | 224 | 284 | 288 | 212 | 214 | 274 | 274 | 166 | 170 | 288 | 290 | 110 | 112 |
| 05rbl.419 | 222 | 252 | 284 | 290 | 212 | 232 | 286 | 294 | 166 | 214 | 282 | 288 | 110 | 112 |
| 05rbl.421 | 214 | 224 | 282 | 282 | 214 | 218 | 280 | 298 | 168 | 182 | 276 | 300 | 110 | 110 |
| 05rbl.427 | 222 | 224 | 284 | 286 | 212 | 236 | 254 | 310 | 170 | 188 | 280 | 284 | 110 | 110 |
| 05rbl.429 | 212 | 212 | 284 | 292 | 210 | 218 | 220 | 284 | 170 | 208 | 284 | 310 | 110 | 110 |
| 06rbl.037 | 224 | 224 | 282 | 286 | 208 | 214 | 288 | 288 | 168 | 168 | 274 | 278 | 110 | 110 |
| 06rbl.043 | 224 | 254 | 282 | 292 | 212 | 212 | 286 | 290 | 170 | 208 | 280 | 296 | 110 | 112 |
| 06rbl.056 | 222 | 228 | 290 | 292 | 216 | 218 | 296 | 314 | 176 | 190 | 288 | 298 | 110 | 110 |
| 06rbl.057 | 224 | 224 | 284 | 290 | 210 | 214 | 292 | 296 | 170 | 170 | 296 | 296 | 110 | 112 |
| 06rbl.059 | 214 | 224 | 282 | 290 | 214 | 230 | 280 | 290 | 170 | 170 | 270 | 286 | 110 | 112 |
| 06rbl.061 | 226 | 228 | 290 | 292 | 216 | 218 | 294 | 296 | 194 | 194 | 270 | 290 | 110 | 112 |
| 06rbl.064 | 228 | 232 | 290 | 292 | 204 | 216 | 286 | 298 | 196 | 196 | 280 | 290 | 110 | 112 |
| 06rbl.075 | 214 | 224 | 284 | 284 | 212 | 214 | 274 | 290 | 150 | 172 | 272 | 300 | 110 | 110 |
| 06rbl.083 | 226 | 242 | 282 | 290 | 214 | 218 | 254 | 296 | 172 | 230 | 284 | 284 | 110 | 110 |
| 06rbl.087 | 214 | 226 | 282 | 286 | 208 | 214 | 292 | 296 | 168 | 172 | 278 | 296 | 110 | 112 |
| 06rbl.089 | 216 | 224 | 282 | 282 | 214 | 214 | 286 | 296 | 162 | 176 | 270 | 290 | 110 | 112 |
| 06rbl.090 | 212 | 224 | 282 | 282 | 210 | 222 | 280 | 282 | 150 | 200 | 284 | 302 | 110 | 110 |
| 06rbl.094 | 214 | 224 | 284 | 292 | 214 | 218 | 250 | 306 | 170 | 222 | 284 | 296 | 110 | 112 |
| 06rbl.095 | 232 | 232 | 280 | 286 | 208 | 216 | 270 | 276 | 150 | 220 | 276 | 284 | 110 | 110 |
| 06rbl.098 | 214 | 214 | 286 | 290 | 216 | 218 | 256 | 272 | 192 | 220 | 294 | 298 | 110 | 110 |
| 06rbl.103 | 226 | 226 | 282 | 290 | 214 | 214 | 284 | 308 | 168 | 172 | 286 | 292 | 110 | 112 |
| 06rbl.107 | 228 | 228 | 282 | 292 | 208 | 214 | 272 | 274 | 200 | 200 | 270 | 284 | 110 | 110 |
| 06rbl.109 | 224 | 224 | 280 | 286 | 218 | 218 | 282 | 290 | 190 | 206 | 274 | 284 | 110 | 110 |
| 06rbl.110 | 218 | 256 | 282 | 284 | 214 | 214 | 272 | 296 | 172 | 172 | 284 | 302 | 110 | 110 |
| 06rbl.119 | 224 | 228 | 282 | 288 | 214 | 214 | 256 | 284 | 170 | 194 | 280 | 286 | 110 | 110 |
| 06rbl.122 | 214 | 214 | 282 | 282 | 214 | 214 | 268 | 296 | 194 | 210 | 292 | 302 | 110 | 112 |
| 06rbl.127 | 224 | 252 | 284 | 286 | 214 | 214 | 272 | 286 | 204 | 204 | 280 | 282 | 110 | 112 |
| 06rbl.130 | 214 | 226 | 290 | 290 | 204 | 218 | 268 | 298 | 170 | 170 | 274 | 296 | 110 | 112 |
| 06rbl.133 | 232 | 232 | 290 | 290 | 216 | 222 | 286 | 292 | 168 | 212 | 276 | 282 | 110 | 112 |
| 06rbl.141 | 214 | 248 | 282 | 290 | 210 | 212 | 244 | 254 | 170 | 214 | 284 | 300 | 110 | 110 |
| 06rbl.144 | 226 | 228 | 286 | 290 | 214 | 214 | 284 | 288 | 192 | 200 | 266 | 290 | 110 | 110 |
| 06rbl.147 | 214 | 222 | 286 | 290 | 220 | 226 | 298 | 304 | 180 | 204 | 264 | 300 | 110 | 112 |
| 06rbl.158 | 220 | 226 | 282 | 284 | 204 | 210 | 270 | 290 | 176 | 200 | 280 | 290 | 110 | 112 |
| 06rbl.159 | 222 | 228 | 282 | 284 | 212 | 220 | 220 | 256 | 170 | 208 | 276 | 294 | 110 | 110 |

|           |     |     |     |     |     |     |     |     |     |     |     |     |     |     |
|-----------|-----|-----|-----|-----|-----|-----|-----|-----|-----|-----|-----|-----|-----|-----|
| 06rbl.161 | 214 | 234 | 282 | 290 | 214 | 214 | 294 | 298 | 178 | 200 | 262 | 288 | 110 | 112 |
| 06rbl.162 | 214 | 222 | 284 | 284 | 210 | 212 | 256 | 282 | 170 | 170 | 278 | 294 | 110 | 110 |
| 06rbl.163 | 222 | 234 | 284 | 290 | 204 | 214 | 270 | 284 | 150 | 204 | 288 | 290 | 110 | 112 |
| 06rbl.167 | 214 | 222 | 284 | 284 | 218 | 220 | 266 | 290 | 178 | 220 | 294 | 296 | 110 | 110 |
| 06rbl.168 | 214 | 222 | 284 | 290 | 210 | 220 | 256 | 270 | 166 | 176 | 278 | 294 | 110 | 112 |
| 06rbl.180 | 222 | 224 | 282 | 288 | 214 | 214 | 290 | 312 | 166 | 202 | 284 | 286 | 110 | 110 |
| 06rbl.187 | 214 | 214 | 284 | 290 | 220 | 222 | 282 | 286 | 200 | 204 | 274 | 298 | 110 | 110 |
| 06rbl.191 | 218 | 232 | 282 | 290 | 214 | 218 | 294 | 294 | 170 | 174 | 276 | 290 | 110 | 112 |
| 06rbl.201 | 226 | 226 | 282 | 286 | 214 | 218 | 286 | 292 | 192 | 212 | 268 | 290 | 110 | 114 |
| 06rbl.203 | 214 | 222 | 282 | 290 | 220 | 230 | 252 | 270 | 188 | 204 | 274 | 286 | 110 | 112 |
| 06rbl.206 | 224 | 252 | 286 | 290 | 214 | 222 | 252 | 290 | 168 | 192 | 290 | 310 | 110 | 110 |
| 06rbl.211 | 212 | 214 | 282 | 286 | 218 | 218 | 274 | 308 | 172 | 188 | 280 | 284 | 110 | 110 |
| 06rbl.231 | 224 | 230 | 290 | 290 | 216 | 220 | 286 | 286 | 168 | 194 | 294 | 294 | 110 | 110 |
| 06rbl.245 | 216 | 232 | 284 | 286 | 216 | 216 | 286 | 286 | 192 | 202 | 290 | 292 | 110 | 110 |
| 06rbl.247 | 218 | 218 | 282 | 290 | 204 | 236 | 300 | 304 | 172 | 172 | 288 | 292 | 110 | 110 |
| 06rbl.251 | 224 | 224 | 282 | 282 | 214 | 222 | 278 | 282 | 196 | 196 | 282 | 286 | 110 | 110 |
| 06rbl.252 | 212 | 224 | 282 | 286 | 214 | 218 | 274 | 284 | 198 | 198 | 270 | 302 | 110 | 110 |
| 06rbl.257 | 222 | 224 | 282 | 286 | 212 | 214 | 294 | 294 | 176 | 208 | 290 | 298 | 110 | 110 |
| 06rbl.258 | 222 | 226 | 282 | 286 | 212 | 218 | 278 | 300 | 170 | 198 | 286 | 304 | 110 | 110 |
| 06rbl.271 | 222 | 228 | 290 | 290 | 202 | 212 | 292 | 310 | 174 | 194 | 270 | 284 | 110 | 114 |
| 06rbl.273 | 222 | 226 | 286 | 290 | 204 | 214 | 252 | 274 | 184 | 198 | 272 | 286 | 110 | 112 |
| 06rbl.278 | 214 | 232 | 282 | 286 | 208 | 216 | 286 | 300 | 176 | 228 | 284 | 284 | 110 | 110 |
| 06rbl.283 | 220 | 222 | 282 | 290 | 212 | 216 | 274 | 274 | 170 | 194 | 286 | 294 | 110 | 110 |
| 06rbl.286 | 218 | 224 | 284 | 290 | 208 | 214 | 288 | 310 | 168 | 210 | 290 | 290 | 112 | 112 |
| 06rbl.288 | 228 | 232 | 282 | 284 | 216 | 222 | 282 | 298 | 170 | 202 | 278 | 284 | 110 | 110 |
| 06rbl.295 | 224 | 228 | 282 | 290 | 218 | 222 | 282 | 312 | 172 | 194 | 270 | 278 | 110 | 110 |
| 06rbl.301 | 234 | 252 | 284 | 284 | 210 | 212 | 284 | 292 | 170 | 192 | 268 | 276 | 110 | 110 |
| 06rbl.315 | 228 | 228 | 282 | 282 | 214 | 214 | 300 | 304 | 204 | 216 | 278 | 286 | 110 | 110 |
| 06rbl.317 | 216 | 224 | 290 | 290 | 210 | 210 | 256 | 274 | 202 | 214 | 292 | 302 | 110 | 112 |
| 06rbl.319 | 224 | 224 | 282 | 292 | 218 | 218 | 286 | 294 | 194 | 206 | 272 | 276 | 110 | 110 |
| 06rbl.320 | 218 | 232 | 282 | 282 | 212 | 214 | 272 | 306 | 216 | 226 | 272 | 282 | 110 | 110 |
| 06rbl.321 | 214 | 250 | 284 | 286 | 212 | 220 | 292 | 306 | 168 | 204 | 264 | 268 | 110 | 112 |
| 06rbl.322 | 218 | 230 | 282 | 286 | 214 | 214 | 290 | 300 | 170 | 196 | 276 | 282 | 110 | 110 |
| 06rbl.329 | 224 | 232 | 284 | 294 | 210 | 212 | 286 | 286 | 166 | 222 | 278 | 278 | 110 | 112 |
| 06rbl.336 | 214 | 226 | 284 | 286 | 210 | 214 | 272 | 284 | 190 | 202 | 276 | 280 | 110 | 112 |
| 06rbl.339 | 218 | 232 | 282 | 288 | 212 | 214 | 256 | 296 | 166 | 168 | 270 | 278 | 110 | 112 |
| 06rbl.341 | 214 | 224 | 282 | 286 | 216 | 218 | 252 | 296 | 166 | 174 | 278 | 298 | 110 | 112 |

|           |     |     |     |     |     |     |     |     |     |     |     |     |     |     |
|-----------|-----|-----|-----|-----|-----|-----|-----|-----|-----|-----|-----|-----|-----|-----|
| 06rbl.349 | 222 | 226 | 282 | 282 | 202 | 214 | 278 | 294 | 186 | 186 | 286 | 300 | 110 | 114 |
| 06rbl.355 | 224 | 224 | 282 | 282 | 210 | 228 | 272 | 284 | 198 | 226 | 280 | 292 | 110 | 114 |
| 06rbl.356 | 222 | 230 | 282 | 290 | 214 | 216 | 300 | 300 | 212 | 212 | 278 | 282 | 110 | 112 |
| 06rbl.372 | 226 | 230 | 286 | 286 | 212 | 214 | 298 | 298 | 214 | 214 | 282 | 296 | 110 | 112 |
| 06rbl.375 | 216 | 218 | 282 | 290 | 216 | 216 | 286 | 306 | 150 | 196 | 276 | 284 | 110 | 110 |
| 06rbl.382 | 228 | 248 | 290 | 290 | 208 | 210 | 312 | 314 | 150 | 150 | 276 | 278 | 114 | 114 |
| 06rbl.383 | 220 | 222 | 282 | 290 | 210 | 218 | 288 | 296 | 150 | 170 | 276 | 284 | 110 | 110 |
| 06rbl.386 | 220 | 222 | 286 | 286 | 208 | 214 | 296 | 296 | 168 | 196 | 284 | 292 | 110 | 116 |
| 06rbl.388 | 224 | 248 | 282 | 286 | 214 | 218 | 288 | 290 | 188 | 196 | 280 | 284 | 110 | 110 |
| 06rbl.389 | 224 | 226 | 282 | 282 | 214 | 230 | 304 | 308 | 172 | 172 | 300 | 300 | 110 | 114 |
| 06rbl.390 | 214 | 224 | 282 | 286 | 212 | 216 | 272 | 288 | 174 | 174 | 290 | 308 | 110 | 110 |
| 06rbl.391 | 222 | 226 | 282 | 290 | 214 | 214 | 288 | 288 | 188 | 200 | 284 | 292 | 110 | 112 |
| 06rbl.395 | 218 | 220 | 290 | 290 | 208 | 210 | 296 | 314 | 150 | 150 | 276 | 286 | 110 | 114 |
| 06rbl.397 | 220 | 222 | 284 | 288 | 210 | 216 | 288 | 314 | 196 | 212 | 278 | 280 | 110 | 116 |
| 06rbl.420 | 222 | 224 | 286 | 290 | 208 | 214 | 290 | 294 | 162 | 202 | 276 | 300 | 110 | 110 |
| 06rbl.421 | 224 | 226 | 282 | 282 | 208 | 214 | 246 | 282 | 170 | 206 | 286 | 290 | 110 | 112 |
| 06rbl.424 | 222 | 224 | 292 | 292 | 210 | 212 | 266 | 272 | 170 | 196 | 282 | 288 | 110 | 112 |
| 06rbl.452 | 214 | 222 | 282 | 284 | 214 | 218 | 274 | 292 | 166 | 214 | 276 | 280 | 110 | 110 |
| 06rbl.460 | 212 | 232 | 282 | 292 | 210 | 218 | 294 | 298 | 168 | 178 | 270 | 280 | 110 | 110 |
| 06rbl.469 | 222 | 222 | 286 | 292 | 216 | 230 | 260 | 274 | 168 | 200 | 284 | 302 | 110 | 110 |
| 06rbl.471 | 224 | 246 | 284 | 284 | 214 | 232 | 254 | 290 | 178 | 212 | 296 | 296 | 110 | 110 |
| 06rbl.475 | 228 | 228 | 282 | 282 | 214 | 218 | 272 | 292 | 170 | 170 | 268 | 292 | 110 | 110 |
| 06rbl.478 | 214 | 220 | 282 | 292 | 204 | 218 | 290 | 294 | 182 | 182 | 284 | 306 | 110 | 112 |
| 06rbl.481 | 246 | 246 | 282 | 282 | 216 | 232 | 272 | 282 | 150 | 170 | 276 | 298 | 110 | 110 |
| 06rbl.488 | 216 | 222 | 284 | 284 | 216 | 228 | 292 | 312 | 170 | 170 | 262 | 276 | 110 | 110 |
| 06rbl.495 | 214 | 226 | 284 | 286 | 212 | 218 | 282 | 288 | 168 | 202 | 292 | 308 | 110 | 110 |
| 06rbl.501 | 214 | 238 | 282 | 282 | 214 | 216 | 264 | 286 | 202 | 202 | 266 | 290 | 110 | 110 |
| 06rbl.508 | 226 | 232 | 282 | 290 | 210 | 218 | 290 | 304 | 172 | 172 | 282 | 294 | 110 | 114 |
| 06rbl.509 | 214 | 218 | 286 | 290 | 214 | 218 | 286 | 292 | 196 | 196 | 284 | 288 | 110 | 110 |
| 06rbl.515 | 222 | 222 | 292 | 292 | 216 | 218 | 254 | 292 | 190 | 190 | 274 | 290 | 110 | 110 |
| 06rbl.522 | 224 | 224 | 282 | 282 | 214 | 218 | 284 | 286 | 170 | 192 | 282 | 294 | 110 | 110 |
| 06rbl.526 | 212 | 216 | 284 | 292 | 206 | 214 | 284 | 288 | 194 | 194 | 276 | 288 | 110 | 110 |
| 06rbl.534 | 220 | 238 | 282 | 290 | 214 | 218 | 284 | 290 | 172 | 196 | 290 | 292 | 110 | 110 |
| 06rbl.536 | 214 | 224 | 282 | 290 | 216 | 220 | 292 | 306 | 168 | 200 | 288 | 290 | 110 | 110 |
| 06rbl.545 | 212 | 214 | 282 | 290 | 212 | 218 | 294 | 306 | 168 | 196 | 280 | 286 | 110 | 110 |
| 06rbl.548 | 224 | 224 | 282 | 290 | 212 | 212 | 294 | 306 | 202 | 202 | 284 | 286 | 110 | 110 |
| 06rbl.551 | 218 | 224 | 286 | 286 | 218 | 220 | 274 | 274 | 194 | 196 | 272 | 286 | 110 | 110 |

|           |     |     |     |     |     |     |     |     |     |     |     |     |     |     |
|-----------|-----|-----|-----|-----|-----|-----|-----|-----|-----|-----|-----|-----|-----|-----|
| 06rbl.552 | 214 | 226 | 288 | 290 | 210 | 214 | 286 | 292 | 168 | 206 | 268 | 306 | 110 | 112 |
| 06rbl.553 | 224 | 224 | 282 | 286 | 212 | 218 | 214 | 288 | 170 | 178 | 282 | 282 | 110 | 112 |
| 06rbl.565 | 216 | 222 | 284 | 290 | 214 | 214 | 264 | 286 | 202 | 208 | 280 | 304 | 110 | 112 |
| 06rbl.568 | 222 | 222 | 282 | 284 | 214 | 216 | 254 | 278 | 166 | 202 | 274 | 288 | 110 | 112 |
| 06rbl.577 | 214 | 224 | 282 | 290 | 214 | 218 | 288 | 288 | 202 | 206 | 274 | 282 | 110 | 110 |
| 06rbl.579 | 212 | 218 | 282 | 286 | 214 | 214 | 290 | 298 | 190 | 190 | 272 | 290 | 110 | 112 |
| 06rbl.580 | 218 | 224 | 282 | 286 | 214 | 232 | 272 | 306 | 186 | 188 | 286 | 294 | 110 | 114 |
| 06rbl.581 | 224 | 224 | 284 | 294 | 214 | 230 | 292 | 294 | 166 | 166 | 272 | 276 | 110 | 110 |
| 06rbl.583 | 222 | 226 | 282 | 282 | 214 | 214 | 280 | 282 | 216 | 216 | 286 | 292 | 110 | 110 |
| 06rbl.584 | 226 | 230 | 288 | 292 | 208 | 236 | 286 | 310 | 150 | 150 | 284 | 294 | 110 | 112 |
| 06rbl.588 | 246 | 256 | 286 | 286 | 210 | 214 | 288 | 290 | 150 | 194 | 282 | 296 | 110 | 110 |
| 06rbl.590 | 228 | 250 | 286 | 292 | 214 | 220 | 304 | 304 | 174 | 196 | 272 | 288 | 110 | 110 |
| 06rbl.598 | 224 | 224 | 282 | 282 | 214 | 218 | 272 | 294 | 196 | 214 | 284 | 286 | 110 | 110 |
| 06rbl.600 | 224 | 224 | 284 | 290 | 214 | 222 | 266 | 294 | 150 | 210 | 276 | 276 | 110 | 110 |
| 06rbl.611 | 214 | 222 | 282 | 286 | 214 | 216 | 252 | 298 | 174 | 174 | 280 | 298 | 110 | 112 |
| 06rbl.623 | 218 | 226 | 282 | 290 | 210 | 218 | 274 | 290 | 200 | 200 | 266 | 282 | 110 | 112 |
| 06rbl.628 | 214 | 224 | 282 | 292 | 216 | 218 | 250 | 264 | 174 | 216 | 266 | 266 | 110 | 112 |
| 07rbl.001 | 212 | 224 | 282 | 292 | 216 | 218 | 290 | 298 | 178 | 220 | 274 | 288 | 110 | 110 |
| 07rbl.003 | 224 | 226 | 282 | 288 | 202 | 202 | 252 | 292 | 174 | 202 | 270 | 288 | 110 | 112 |
| 07rbl.007 | 214 | 228 | 282 | 290 | 214 | 220 | 266 | 282 | 170 | 186 | 268 | 282 | 110 | 110 |
| 07rbl.008 | 214 | 226 | 286 | 292 | 218 | 236 | 256 | 276 | 150 | 192 | 292 | 294 | 110 | 110 |
| 07rbl.009 | 224 | 224 | 282 | 288 | 208 | 214 | 288 | 300 | 150 | 200 | 288 | 300 | 110 | 110 |
| 07rbl.010 | 218 | 224 | 286 | 290 | 212 | 212 | 300 | 304 | 150 | 216 | 266 | 294 | 110 | 112 |
| 07rbl.014 | 226 | 244 | 286 | 286 | 214 | 218 | 268 | 272 | 188 | 200 | 284 | 286 | 110 | 112 |
| 07rbl.015 | 224 | 224 | 282 | 284 | 214 | 236 | 272 | 304 | 180 | 196 | 272 | 300 | 110 | 112 |
| 07rbl.016 | 224 | 224 | 284 | 286 | 202 | 234 | 258 | 292 | 170 | 210 | 294 | 298 | 110 | 110 |
| 07rbl.019 | 216 | 228 | 286 | 290 | 210 | 216 | 220 | 300 | 170 | 210 | 286 | 288 | 110 | 110 |
| 07rbl.021 | 224 | 232 | 282 | 282 | 214 | 214 | 272 | 304 | 196 | 196 | 278 | 294 | 110 | 110 |
| 07rbl.023 | 224 | 226 | 284 | 288 | 214 | 216 | 272 | 284 | 196 | 208 | 282 | 286 | 112 | 112 |
| 07rbl.024 | 214 | 216 | 286 | 290 | 214 | 218 | 272 | 286 | 200 | 212 | 274 | 296 | 110 | 110 |
| 07rbl.028 | 214 | 226 | 286 | 290 | 212 | 212 | 296 | 298 | 172 | 172 | 284 | 292 | 110 | 110 |
| 07rbl.029 | 224 | 226 | 286 | 286 | 210 | 224 | 312 | 312 | 172 | 196 | 286 | 294 | 110 | 112 |
| 07rbl.033 | 214 | 238 | 282 | 290 | 212 | 214 | 286 | 290 | 168 | 212 | 274 | 282 | 110 | 110 |
| 07rbl.045 | 214 | 218 | 282 | 290 | 214 | 214 | 280 | 294 | 166 | 174 | 280 | 286 | 110 | 112 |
| 07rbl.051 | 214 | 226 | 282 | 284 | 212 | 212 | 252 | 268 | 188 | 208 | 272 | 286 | 112 | 112 |
| 07rbl.054 | 214 | 226 | 288 | 290 | 212 | 218 | 254 | 254 | 150 | 150 | 284 | 298 | 110 | 112 |
| 07rbl.055 | 212 | 224 | 286 | 286 | 210 | 214 | 250 | 290 | 150 | 170 | 282 | 284 | 110 | 110 |

|           |     |     |     |     |     |     |     |     |     |     |     |     |     |     |
|-----------|-----|-----|-----|-----|-----|-----|-----|-----|-----|-----|-----|-----|-----|-----|
| 07rbl.057 | 212 | 228 | 292 | 292 | 208 | 222 | 252 | 286 | 170 | 170 | 270 | 286 | 110 | 114 |
| 07rbl.058 | 214 | 214 | 290 | 290 | 212 | 214 | 278 | 292 | 176 | 196 | 274 | 296 | 110 | 112 |
| 07rbl.060 | 222 | 248 | 282 | 282 | 214 | 218 | 272 | 304 | 182 | 208 | 286 | 294 | 110 | 112 |
| 07rbl.063 | 212 | 222 | 286 | 290 | 208 | 214 | 256 | 290 | 150 | 160 | 262 | 290 | 110 | 112 |
| 07rbl.067 | 222 | 222 | 282 | 286 | 202 | 212 | 284 | 302 | 150 | 206 | 272 | 278 | 110 | 110 |
| 07rbl.069 | 212 | 218 | 288 | 290 | 218 | 222 | 256 | 280 | 208 | 214 | 272 | 288 | 110 | 112 |
| 07rbl.070 | 222 | 222 | 282 | 282 | 212 | 222 | 256 | 302 | 170 | 180 | 278 | 288 | 112 | 112 |
| 07rbl.072 | 222 | 228 | 282 | 286 | 212 | 214 | 306 | 306 | 172 | 196 | 286 | 310 | 110 | 110 |
| 07rbl.073 | 214 | 230 | 288 | 290 | 214 | 236 | 292 | 292 | 186 | 214 | 262 | 296 | 110 | 112 |
| 07rbl.076 | 224 | 236 | 282 | 290 | 214 | 214 | 272 | 288 | 166 | 172 | 298 | 310 | 110 | 110 |
| 07rbl.078 | 212 | 224 | 286 | 290 | 212 | 228 | 286 | 300 | 150 | 214 | 266 | 282 | 110 | 110 |
| 07rbl.080 | 214 | 218 | 282 | 282 | 208 | 214 | 292 | 300 | 172 | 212 | 274 | 302 | 110 | 110 |
| 07rbl.082 | 224 | 226 | 282 | 286 | 208 | 222 | 260 | 286 | 174 | 196 | 266 | 286 | 110 | 112 |
| 07rbl.083 | 232 | 232 | 282 | 290 | 218 | 222 | 278 | 312 | 198 | 206 | 274 | 284 | 110 | 110 |
| 07rbl.085 | 224 | 228 | 282 | 292 | 202 | 214 | 252 | 298 | 150 | 170 | 292 | 298 | 110 | 110 |
| 07rbl.089 | 224 | 224 | 290 | 290 | 222 | 222 | 268 | 288 | 150 | 204 | 270 | 298 | 110 | 112 |
| 07rbl.091 | 214 | 214 | 286 | 288 | 218 | 218 | 292 | 304 | 200 | 212 | 270 | 280 | 110 | 114 |
| 07rbl.094 | 228 | 228 | 282 | 286 | 214 | 214 | 256 | 270 | 190 | 204 | 270 | 280 | 110 | 110 |
| 07rbl.095 | 222 | 224 | 284 | 290 | 210 | 222 | 288 | 306 | 178 | 216 | 272 | 292 | 112 | 112 |
| 07rbl.097 | 222 | 226 | 286 | 294 | 208 | 214 | 288 | 292 | 194 | 202 | 290 | 294 | 110 | 110 |
| 07rbl.099 | 212 | 214 | 282 | 290 | 214 | 220 | 290 | 300 | 150 | 168 | 282 | 300 | 110 | 112 |
| 07rbl.106 | 226 | 226 | 288 | 294 | 214 | 216 | 288 | 292 | 168 | 198 | 290 | 298 | 110 | 110 |
| 07rbl.110 | 212 | 224 | 282 | 286 | 214 | 218 | 256 | 270 | 206 | 208 | 274 | 292 | 110 | 110 |
| 07rbl.111 | 212 | 218 | 284 | 286 | 212 | 214 | 286 | 290 | 202 | 206 | 292 | 300 | 110 | 110 |
| 07rbl.113 | 214 | 228 | 290 | 292 | 210 | 218 | 280 | 300 | 172 | 208 | 270 | 286 | 110 | 110 |
| 07rbl.118 | 214 | 224 | 282 | 292 | 214 | 220 | 288 | 304 | 150 | 184 | 288 | 294 | 110 | 112 |
| 07rbl.122 | 226 | 226 | 290 | 292 | 202 | 214 | 274 | 290 | 194 | 206 | 280 | 294 | 110 | 110 |
| 07rbl.123 | 224 | 232 | 282 | 298 | 210 | 212 | 286 | 294 | 174 | 202 | 282 | 290 | 112 | 112 |
| 07rbl.124 | 214 | 226 | 282 | 284 | 208 | 214 | 272 | 294 | 166 | 178 | 262 | 280 | 110 | 112 |
| 07rbl.125 | 212 | 232 | 282 | 284 | 212 | 214 | 290 | 298 | 212 | 216 | 280 | 296 | 110 | 110 |
| 07rbl.130 | 218 | 226 | 286 | 292 | 214 | 214 | 214 | 308 | 196 | 200 | 272 | 282 | 110 | 110 |
| 07rbl.132 | 214 | 224 | 282 | 286 | 214 | 214 | 298 | 302 | 168 | 192 | 284 | 296 | 110 | 110 |
| 07rbl.136 | 214 | 224 | 280 | 290 | 210 | 212 | 256 | 286 | 168 | 204 | 266 | 266 | 110 | 110 |
| 07rbl.139 | 224 | 230 | 284 | 284 | 214 | 218 | 256 | 286 | 192 | 192 | 280 | 294 | 110 | 110 |
| 07rbl.144 | 220 | 224 | 282 | 290 | 210 | 218 | 292 | 304 | 172 | 204 | 266 | 292 | 110 | 110 |
| 07rbl.152 | 224 | 224 | 282 | 290 | 214 | 216 | 220 | 272 | 190 | 208 | 268 | 278 | 110 | 110 |
| 07rbl.158 | 224 | 224 | 282 | 292 | 210 | 218 | 282 | 298 | 192 | 202 | 288 | 296 | 110 | 110 |

|           |     |     |     |     |     |     |     |     |     |     |     |     |     |     |
|-----------|-----|-----|-----|-----|-----|-----|-----|-----|-----|-----|-----|-----|-----|-----|
| 07rbl.159 | 222 | 232 | 282 | 290 | 208 | 214 | 278 | 280 | 188 | 202 | 270 | 272 | 110 | 110 |
| 07rbl.164 | 212 | 238 | 290 | 290 | 216 | 216 | 276 | 308 | 150 | 190 | 286 | 288 | 112 | 114 |
| 07rbl.167 | 222 | 224 | 288 | 290 | 214 | 218 | 274 | 286 | 166 | 192 | 280 | 306 | 110 | 112 |
| 07rbl.168 | 222 | 224 | 290 | 292 | 214 | 218 | 258 | 312 | 150 | 170 | 280 | 282 | 110 | 110 |
| 07rbl.171 | 214 | 224 | 288 | 292 | 210 | 226 | 286 | 298 | 178 | 200 | 278 | 286 | 110 | 110 |
| 07rbl.179 | 224 | 248 | 288 | 288 | 214 | 214 | 276 | 290 | 168 | 208 | 266 | 276 | 110 | 110 |
| 07rbl.180 | 222 | 226 | 286 | 286 | 218 | 230 | 280 | 286 | 174 | 188 | 288 | 298 | 110 | 112 |
| 07rbl.182 | 214 | 226 | 286 | 286 | 218 | 222 | 274 | 290 | 170 | 214 | 284 | 286 | 110 | 112 |
| 07rbl.183 | 228 | 232 | 282 | 286 | 210 | 212 | 262 | 286 | 168 | 216 | 280 | 290 | 110 | 110 |
| 07rbl.186 | 220 | 222 | 282 | 290 | 212 | 228 | 274 | 300 | 176 | 192 | 280 | 292 | 110 | 110 |
| 07rbl.187 | 226 | 230 | 282 | 288 | 218 | 232 | 268 | 278 | 196 | 212 | 284 | 286 | 110 | 110 |
| 07rbl.188 | 214 | 224 | 282 | 286 | 214 | 218 | 298 | 298 | 198 | 204 | 268 | 286 | 110 | 110 |
| 07rbl.189 | 226 | 228 | 284 | 286 | 214 | 214 | 306 | 314 | 194 | 202 | 290 | 296 | 110 | 114 |
| 07rbl.192 | 216 | 226 | 284 | 292 | 204 | 214 | 250 | 304 | 198 | 214 | 288 | 288 | 110 | 112 |
| 07rbl.195 | 222 | 224 | 282 | 288 | 212 | 212 | 256 | 294 | 170 | 174 | 278 | 284 | 110 | 110 |
| 07rbl.196 | 214 | 232 | 290 | 296 | 210 | 214 | 256 | 282 | 190 | 198 | 284 | 290 | 110 | 110 |
| 07rbl.203 | 246 | 254 | 290 | 292 | 216 | 232 | 262 | 284 | 170 | 196 | 282 | 286 | 110 | 110 |
| 07rbl.205 | 228 | 254 | 282 | 290 | 218 | 218 | 266 | 284 | 212 | 212 | 282 | 288 | 110 | 110 |
| 07rbl.210 | 216 | 224 | 284 | 292 | 236 | 236 | 256 | 258 | 174 | 196 | 272 | 290 | 110 | 112 |
| 07rbl.211 | 224 | 244 | 286 | 292 | 214 | 220 | 252 | 314 | 150 | 178 | 298 | 298 | 110 | 114 |
| 07rbl.212 | 222 | 226 | 286 | 292 | 214 | 216 | 272 | 290 | 150 | 166 | 288 | 298 | 110 | 110 |
| 07rbl.213 | 224 | 224 | 284 | 286 | 210 | 214 | 286 | 288 | 150 | 168 | 282 | 296 | 112 | 114 |
| 07rbl.214 | 224 | 228 | 282 | 286 | 204 | 214 | 292 | 298 | 182 | 204 | 268 | 280 | 110 | 110 |
| 07rbl.215 | 218 | 228 | 286 | 292 | 214 | 218 | 290 | 302 | 174 | 174 | 290 | 290 | 110 | 112 |
| 07rbl.217 | 224 | 224 | 288 | 290 | 214 | 222 | 284 | 302 | 168 | 198 | 280 | 302 | 110 | 112 |
| 07rbl.219 | 224 | 252 | 282 | 292 | 216 | 222 | 282 | 304 | 208 | 208 | 280 | 282 | 110 | 110 |
| 07rbl.220 | 224 | 226 | 288 | 290 | 202 | 218 | 292 | 312 | 194 | 206 | 270 | 276 | 110 | 112 |
| 07rbl.221 | 214 | 222 | 282 | 282 | 210 | 230 | 254 | 288 | 174 | 174 | 288 | 300 | 110 | 110 |
| 07rbl.225 | 224 | 230 | 282 | 282 | 216 | 222 | 272 | 306 | 176 | 186 | 288 | 296 | 110 | 110 |
| 07rbl.229 | 224 | 226 | 284 | 286 | 218 | 218 | 262 | 266 | 150 | 198 | 278 | 288 | 110 | 110 |
| 07rbl.233 | 224 | 226 | 286 | 292 | 214 | 222 | 290 | 300 | 170 | 182 | 274 | 294 | 110 | 110 |
| 07rbl.235 | 224 | 228 | 286 | 290 | 208 | 218 | 270 | 284 | 150 | 190 | 284 | 296 | 110 | 112 |
| 07rbl.236 | 228 | 232 | 282 | 286 | 208 | 218 | 268 | 294 | 168 | 202 | 284 | 292 | 110 | 112 |
| 07rbl.238 | 222 | 226 | 282 | 284 | 214 | 222 | 274 | 274 | 200 | 216 | 284 | 288 | 110 | 110 |
| 07rbl.240 | 222 | 234 | 286 | 286 | 216 | 218 | 294 | 304 | 150 | 178 | 282 | 286 | 110 | 112 |
| 07rbl.242 | 224 | 230 | 284 | 290 | 212 | 218 | 286 | 312 | 198 | 210 | 274 | 284 | 110 | 110 |
| 07rbl.243 | 222 | 224 | 280 | 282 | 214 | 218 | 282 | 304 | 150 | 168 | 290 | 290 | 110 | 112 |

|           |     |     |     |     |     |     |     |     |     |     |     |     |     |     |
|-----------|-----|-----|-----|-----|-----|-----|-----|-----|-----|-----|-----|-----|-----|-----|
| 07rbl.245 | 214 | 224 | 290 | 292 | 214 | 218 | 216 | 272 | 150 | 168 | 266 | 286 | 110 | 110 |
| 07rbl.251 | 224 | 224 | 282 | 286 | 216 | 218 | 258 | 286 | 150 | 178 | 266 | 276 | 110 | 110 |
| 07rbl.255 | 226 | 230 | 282 | 286 | 210 | 212 | 298 | 298 | 186 | 192 | 272 | 272 | 110 | 112 |
| 07rbl.258 | 224 | 224 | 280 | 280 | 202 | 202 | 296 | 304 | 170 | 190 | 274 | 274 | 110 | 112 |
| 07rbl.259 | 226 | 226 | 284 | 284 | 210 | 234 | 250 | 286 | 168 | 210 | 288 | 294 | 110 | 110 |
| 07rbl.262 | 222 | 226 | 290 | 290 | 216 | 220 | 268 | 302 | 172 | 178 | 294 | 300 | 110 | 110 |
| 07rbl.264 | 224 | 224 | 282 | 282 | 214 | 218 | 284 | 288 | 168 | 210 | 296 | 300 | 110 | 114 |
| 07rbl.266 | 222 | 230 | 284 | 286 | 208 | 218 | 294 | 296 | 174 | 196 | 280 | 286 | 110 | 112 |
| 07rbl.269 | 222 | 230 | 282 | 282 | 216 | 222 | 252 | 296 | 204 | 222 | 274 | 298 | 110 | 112 |
| 07rbl.271 | 224 | 228 | 290 | 298 | 208 | 210 | 252 | 292 | 174 | 174 | 266 | 280 | 112 | 112 |
| 07rbl.272 | 214 | 218 | 282 | 286 | 210 | 214 | 270 | 290 | 170 | 176 | 286 | 286 | 110 | 110 |
| 07rbl.275 | 220 | 224 | 290 | 290 | 218 | 218 | 284 | 284 | 160 | 170 | 280 | 290 | 110 | 110 |
| 07rbl.278 | 212 | 218 | 290 | 290 | 202 | 218 | 252 | 272 | 186 | 202 | 262 | 284 | 110 | 110 |
| 07rbl.279 | 224 | 224 | 284 | 284 | 220 | 228 | 252 | 294 | 198 | 198 | 276 | 280 | 110 | 112 |
| 07rbl.281 | 214 | 222 | 290 | 290 | 214 | 218 | 272 | 312 | 168 | 198 | 290 | 292 | 110 | 110 |
| 07rbl.284 | 224 | 248 | 290 | 292 | 218 | 236 | 252 | 272 | 206 | 206 | 288 | 302 | 110 | 110 |
| 07rbl.286 | 218 | 222 | 282 | 292 | 204 | 218 | 264 | 304 | 172 | 194 | 268 | 286 | 110 | 112 |
| 07rbl.290 | 212 | 224 | 282 | 282 | 206 | 218 | 260 | 274 | 200 | 212 | 284 | 308 | 110 | 110 |
| 07rbl.295 | 218 | 226 | 286 | 290 | 212 | 214 | 288 | 298 | 194 | 220 | 270 | 276 | 110 | 110 |
| 07rbl.296 | 212 | 228 | 286 | 286 | 212 | 214 | 220 | 290 | 188 | 208 | 290 | 302 | 110 | 110 |
| 07rbl.300 | 222 | 224 | 286 | 290 | 208 | 214 | 282 | 290 | 150 | 160 | 276 | 284 | 110 | 110 |
| 07rbl.301 | 222 | 224 | 290 | 290 | 214 | 230 | 280 | 282 | 150 | 160 | 264 | 276 | 110 | 110 |
| 07rbl.302 | 226 | 228 | 282 | 288 | 214 | 222 | 286 | 290 | 206 | 208 | 288 | 292 | 110 | 112 |
| 07rbl.303 | 218 | 224 | 282 | 290 | 216 | 222 | 248 | 272 | 162 | 168 | 270 | 288 | 110 | 112 |
| 07rbl.304 | 216 | 226 | 284 | 292 | 218 | 218 | 288 | 300 | 168 | 190 | 284 | 284 | 110 | 110 |
| 07rbl.309 | 214 | 224 | 290 | 290 | 212 | 214 | 250 | 302 | 202 | 204 | 284 | 288 | 110 | 110 |
| 08rbl.011 | 214 | 228 | 284 | 288 | 208 | 210 | 256 | 304 | 150 | 192 | 282 | 300 | 110 | 112 |
| 08rbl.015 | 226 | 246 | 282 | 284 | 212 | 214 | 270 | 298 | 182 | 200 | 268 | 282 | 110 | 110 |
| 08rbl.020 | 214 | 228 | 282 | 286 | 208 | 226 | 256 | 256 | 194 | 220 | 276 | 294 | 112 | 112 |
| 08rbl.021 | 222 | 224 | 282 | 288 | 214 | 218 | 276 | 314 | 170 | 196 | 280 | 284 | 110 | 110 |
| 08rbl.023 | 214 | 218 | 282 | 290 | 214 | 220 | 252 | 294 | 174 | 178 | 280 | 296 | 110 | 110 |
| 08rbl.025 | 222 | 224 | 282 | 290 | 212 | 214 | 284 | 304 | 220 | 220 | 276 | 278 | 110 | 110 |
| 08rbl.027 | 224 | 232 | 282 | 288 | 214 | 218 | 276 | 284 | 170 | 190 | 290 | 294 | 110 | 110 |
| 08rbl.033 | 228 | 228 | 282 | 284 | 210 | 220 | 282 | 306 | 170 | 200 | 276 | 294 | 110 | 110 |
| 08rbl.034 | 232 | 232 | 284 | 292 | 212 | 212 | 298 | 310 | 174 | 182 | 272 | 278 | 110 | 110 |
| 08rbl.041 | 216 | 224 | 284 | 292 | 214 | 220 | 252 | 298 | 170 | 174 | 274 | 278 | 110 | 110 |
| 08rbl.045 | 224 | 228 | 284 | 286 | 214 | 220 | 268 | 292 | 170 | 210 | 286 | 296 | 110 | 110 |

|           |     |     |     |     |     |     |     |     |     |     |     |     |     |     |
|-----------|-----|-----|-----|-----|-----|-----|-----|-----|-----|-----|-----|-----|-----|-----|
| 08rbl.054 | 226 | 228 | 282 | 282 | 212 | 230 | 254 | 312 | 168 | 174 | 276 | 300 | 110 | 110 |
| 08rbl.055 | 218 | 226 | 288 | 292 | 212 | 218 | 278 | 290 | 162 | 192 | 270 | 282 | 110 | 110 |
| 08rbl.059 | 226 | 248 | 290 | 292 | 212 | 214 | 260 | 294 | 168 | 182 | 266 | 296 | 110 | 110 |
| 08rbl.061 | 212 | 218 | 284 | 284 | 208 | 208 | 268 | 300 | 150 | 198 | 274 | 292 | 110 | 112 |
| 08rbl.064 | 226 | 228 | 286 | 286 | 214 | 224 | 252 | 264 | 168 | 192 | 286 | 286 | 112 | 112 |
| 08rbl.070 | 226 | 254 | 292 | 292 | 208 | 214 | 268 | 282 | 188 | 198 | 276 | 300 | 110 | 110 |
| 08rbl.074 | 214 | 226 | 286 | 292 | 210 | 216 | 280 | 288 | 170 | 200 | 274 | 296 | 110 | 110 |
| 08rbl.079 | 226 | 230 | 284 | 284 | 214 | 218 | 284 | 306 | 0   | 0   | 294 | 302 | 110 | 110 |
| 08rbl.081 | 214 | 224 | 288 | 290 | 216 | 220 | 284 | 298 | 194 | 202 | 282 | 288 | 110 | 110 |
| 08rbl.085 | 228 | 258 | 284 | 284 | 210 | 216 | 270 | 304 | 168 | 224 | 276 | 290 | 110 | 114 |
| 08rbl.124 | 224 | 252 | 286 | 288 | 212 | 218 | 286 | 286 | 166 | 186 | 298 | 300 | 110 | 112 |
| 08rbl.129 | 224 | 228 | 290 | 302 | 208 | 212 | 272 | 298 | 178 | 180 | 270 | 290 | 110 | 112 |
| 08rbl.144 | 222 | 224 | 282 | 290 | 214 | 218 | 264 | 274 | 172 | 228 | 266 | 296 | 110 | 114 |
| 08rbl.153 | 226 | 248 | 282 | 282 | 208 | 214 | 304 | 304 | 174 | 182 | 284 | 284 | 110 | 110 |
| 08rbl.155 | 224 | 232 | 280 | 292 | 222 | 222 | 276 | 276 | 204 | 216 | 282 | 284 | 110 | 110 |
| 08rbl.156 | 212 | 230 | 282 | 290 | 214 | 214 | 256 | 294 | 200 | 224 | 270 | 282 | 110 | 110 |
| 08rbl.159 | 218 | 224 | 286 | 290 | 202 | 214 | 268 | 298 | 170 | 174 | 284 | 294 | 110 | 112 |
| 08rbl.162 | 224 | 224 | 282 | 288 | 212 | 216 | 284 | 298 | 170 | 174 | 268 | 286 | 110 | 114 |
| 08rbl.165 | 212 | 224 | 284 | 284 | 208 | 214 | 272 | 274 | 170 | 194 | 280 | 280 | 110 | 110 |
| 08rbl.167 | 224 | 230 | 284 | 302 | 218 | 220 | 288 | 290 | 184 | 200 | 276 | 280 | 110 | 110 |
| 08rbl.170 | 218 | 226 | 284 | 284 | 216 | 222 | 294 | 294 | 174 | 204 | 286 | 286 | 110 | 110 |
| 08rbl.174 | 218 | 226 | 284 | 288 | 218 | 222 | 286 | 298 | 170 | 186 | 280 | 284 | 110 | 112 |
| 08rbl.175 | 216 | 228 | 284 | 288 | 212 | 236 | 286 | 292 | 170 | 200 | 270 | 298 | 110 | 110 |
| 08rbl.176 | 218 | 228 | 282 | 292 | 204 | 218 | 268 | 300 | 196 | 202 | 266 | 266 | 110 | 110 |
| 08rbl.177 | 224 | 226 | 290 | 302 | 208 | 214 | 272 | 300 | 170 | 178 | 296 | 296 | 110 | 110 |
| 08rbl.182 | 214 | 258 | 290 | 290 | 202 | 214 | 286 | 292 | 176 | 212 | 264 | 264 | 110 | 110 |
| 08rbl.189 | 222 | 228 | 282 | 284 | 212 | 218 | 286 | 288 | 208 | 226 | 286 | 294 | 110 | 112 |
| 08rbl.196 | 224 | 224 | 284 | 284 | 214 | 222 | 282 | 306 | 150 | 202 | 292 | 292 | 110 | 112 |
| 08rbl.210 | 224 | 224 | 284 | 290 | 202 | 214 | 266 | 304 | 162 | 216 | 286 | 286 | 112 | 112 |
| 08rbl.211 | 232 | 246 | 282 | 286 | 210 | 218 | 252 | 306 | 170 | 202 | 266 | 278 | 110 | 110 |
| 08rbl.215 | 222 | 224 | 282 | 290 | 212 | 214 | 268 | 304 | 202 | 212 | 292 | 298 | 110 | 110 |
| 08rbl.225 | 212 | 224 | 284 | 284 | 206 | 232 | 290 | 294 | 202 | 212 | 266 | 298 | 110 | 112 |
| 08rbl.231 | 224 | 230 | 282 | 284 | 212 | 220 | 298 | 304 | 174 | 176 | 288 | 288 | 110 | 110 |
| 08rbl.242 | 226 | 226 | 284 | 286 | 214 | 218 | 272 | 274 | 178 | 220 | 262 | 296 | 110 | 110 |
| 08rbl.244 | 214 | 226 | 284 | 286 | 204 | 214 | 282 | 292 | 178 | 216 | 274 | 286 | 110 | 110 |
| 08rbl.245 | 212 | 224 | 282 | 292 | 208 | 214 | 294 | 296 | 170 | 194 | 276 | 276 | 110 | 114 |
| 08rbl.248 | 214 | 214 | 286 | 290 | 202 | 218 | 268 | 300 | 178 | 178 | 282 | 286 | 110 | 110 |



|           |     |     |     |     |     |     |     |     |     |     |     |     |     |     |
|-----------|-----|-----|-----|-----|-----|-----|-----|-----|-----|-----|-----|-----|-----|-----|
| 08rbl.260 | 222 | 224 | 284 | 292 | 208 | 214 | 292 | 292 | 168 | 170 | 294 | 294 | 112 | 112 |
| 08rbl.277 | 224 | 232 | 284 | 284 | 204 | 214 | 256 | 262 | 174 | 192 | 288 | 290 | 110 | 110 |
| 08rbl.284 | 224 | 224 | 282 | 282 | 212 | 226 | 260 | 260 | 150 | 196 | 282 | 288 | 110 | 110 |
| 08rbl.289 | 214 | 218 | 282 | 284 | 214 | 224 | 266 | 292 | 192 | 202 | 280 | 296 | 110 | 110 |
| 08rbl.295 | 214 | 228 | 284 | 292 | 218 | 218 | 220 | 294 | 190 | 190 | 274 | 288 | 110 | 110 |
| 08rbl.302 | 224 | 248 | 286 | 290 | 216 | 222 | 220 | 288 | 172 | 202 | 268 | 290 | 110 | 110 |
| 08rbl.303 | 224 | 226 | 284 | 288 | 216 | 236 | 282 | 298 | 174 | 202 | 270 | 282 | 110 | 110 |
| 08rbl.308 | 226 | 228 | 282 | 288 | 212 | 222 | 284 | 284 | 166 | 214 | 280 | 306 | 110 | 114 |
| 08rbl.313 | 212 | 216 | 286 | 292 | 212 | 222 | 270 | 282 | 174 | 214 | 266 | 306 | 110 | 114 |
| 08rbl.315 | 224 | 224 | 288 | 290 | 210 | 216 | 278 | 282 | 200 | 202 | 270 | 284 | 110 | 110 |
| 08rbl.318 | 216 | 226 | 292 | 292 | 218 | 220 | 300 | 300 | 150 | 194 | 282 | 298 | 110 | 110 |
| 08rbl.325 | 224 | 248 | 284 | 284 | 214 | 214 | 252 | 274 | 150 | 184 | 286 | 298 | 110 | 110 |
| 08rbl.327 | 226 | 226 | 286 | 286 | 212 | 212 | 252 | 290 | 194 | 202 | 266 | 290 | 110 | 112 |
| 08rbl.337 | 224 | 228 | 286 | 286 | 214 | 216 | 286 | 290 | 166 | 202 | 278 | 288 | 110 | 112 |
| 08rbl.347 | 224 | 238 | 282 | 290 | 204 | 214 | 288 | 288 | 168 | 170 | 278 | 284 | 110 | 110 |
| 08rbl.356 | 222 | 224 | 282 | 282 | 218 | 218 | 282 | 300 | 194 | 200 | 268 | 286 | 110 | 110 |
| 08rbl.360 | 236 | 254 | 300 | 300 | 214 | 214 | 286 | 286 | 186 | 200 | 262 | 274 | 110 | 112 |
| 08rbl.363 | 218 | 226 | 282 | 284 | 216 | 222 | 274 | 286 | 172 | 182 | 266 | 286 | 110 | 110 |
| 08rbl.368 | 226 | 254 | 288 | 292 | 204 | 218 | 286 | 286 | 170 | 192 | 266 | 274 | 110 | 112 |
| 08rbl.371 | 226 | 254 | 284 | 290 | 212 | 222 | 214 | 214 | 170 | 206 | 274 | 286 | 110 | 112 |
| 08rbl.374 | 224 | 228 | 284 | 290 | 214 | 214 | 272 | 276 | 168 | 190 | 278 | 292 | 110 | 110 |
| 08rbl.380 | 214 | 228 | 284 | 290 | 216 | 218 | 272 | 288 | 198 | 214 | 280 | 288 | 110 | 112 |
| 08rbl.384 | 214 | 216 | 286 | 292 | 216 | 220 | 278 | 278 | 168 | 170 | 264 | 270 | 110 | 110 |
| 08rbl.397 | 214 | 224 | 284 | 292 | 212 | 218 | 290 | 304 | 188 | 190 | 286 | 290 | 110 | 110 |
| 08rbl.406 | 214 | 226 | 286 | 292 | 218 | 218 | 290 | 290 | 168 | 198 | 288 | 304 | 110 | 110 |
| 08rbl.412 | 222 | 226 | 288 | 290 | 214 | 218 | 256 | 290 | 204 | 204 | 284 | 286 | 110 | 110 |
| 08rbl.415 | 228 | 228 | 288 | 288 | 220 | 220 | 0   | 0   | 168 | 168 | 272 | 276 | 110 | 110 |
| 08rbl.418 | 224 | 228 | 286 | 292 | 216 | 222 | 290 | 290 | 200 | 200 | 278 | 288 | 110 | 110 |
| 08rbl.425 | 218 | 222 | 282 | 292 | 214 | 218 | 274 | 308 | 150 | 194 | 284 | 290 | 110 | 110 |
| 08rbl.430 | 222 | 224 | 286 | 292 | 216 | 220 | 250 | 250 | 168 | 202 | 270 | 302 | 110 | 110 |
| 08rbl.442 | 216 | 216 | 282 | 292 | 206 | 218 | 256 | 290 | 170 | 178 | 272 | 272 | 110 | 110 |
| 08rbl.446 | 218 | 232 | 284 | 286 | 214 | 224 | 270 | 292 | 204 | 206 | 286 | 302 | 110 | 110 |
| 08rbl.447 | 226 | 234 | 284 | 294 | 212 | 222 | 284 | 304 | 184 | 220 | 282 | 292 | 110 | 110 |
| 08rbl.449 | 216 | 246 | 286 | 286 | 214 | 220 | 280 | 300 | 192 | 198 | 268 | 282 | 110 | 110 |
| 08rbl.450 | 246 | 252 | 286 | 292 | 212 | 214 | 294 | 298 | 168 | 198 | 270 | 296 | 110 | 110 |
| 08rbl.459 | 216 | 216 | 284 | 294 | 202 | 222 | 286 | 312 | 204 | 206 | 284 | 300 | 110 | 110 |
| 08rbl.466 | 216 | 246 | 284 | 292 | 214 | 218 | 286 | 294 | 168 | 208 | 270 | 296 | 110 | 112 |

|           |     |     |     |     |     |     |     |     |     |     |     |     |     |     |
|-----------|-----|-----|-----|-----|-----|-----|-----|-----|-----|-----|-----|-----|-----|-----|
| 08rbl.467 | 220 | 224 | 286 | 290 | 204 | 222 | 278 | 284 | 170 | 170 | 266 | 288 | 110 | 110 |
| 08rbl.470 | 222 | 224 | 282 | 292 | 214 | 236 | 286 | 294 | 190 | 190 | 298 | 306 | 110 | 110 |
| 08rbl.475 | 224 | 224 | 288 | 292 | 214 | 218 | 290 | 298 | 150 | 208 | 270 | 298 | 110 | 110 |
| 08rbl.482 | 224 | 224 | 282 | 282 | 216 | 218 | 300 | 304 | 192 | 216 | 292 | 300 | 110 | 110 |
| 08rbl.487 | 212 | 224 | 286 | 288 | 228 | 230 | 290 | 296 | 150 | 202 | 276 | 296 | 110 | 110 |
| 08rbl.493 | 212 | 224 | 292 | 292 | 228 | 230 | 290 | 296 | 208 | 216 | 290 | 294 | 110 | 110 |
| 08rbl.497 | 226 | 254 | 288 | 294 | 214 | 236 | 288 | 292 | 162 | 196 | 276 | 304 | 110 | 110 |
| 08rbl.502 | 212 | 228 | 282 | 284 | 214 | 220 | 268 | 282 | 170 | 192 | 282 | 288 | 110 | 110 |
| 08rbl.508 | 224 | 224 | 284 | 288 | 214 | 234 | 270 | 290 | 208 | 210 | 288 | 304 | 110 | 114 |
| 08rbl.509 | 212 | 224 | 282 | 290 | 208 | 214 | 292 | 294 | 208 | 212 | 274 | 288 | 110 | 110 |
| 08rbl.511 | 216 | 238 | 292 | 292 | 214 | 218 | 244 | 298 | 172 | 172 | 290 | 298 | 110 | 110 |
| 08rbl.513 | 224 | 234 | 282 | 290 | 216 | 216 | 282 | 292 | 0   | 0   | 280 | 300 | 110 | 112 |
| 08rbl.516 | 224 | 228 | 284 | 292 | 216 | 236 | 258 | 286 | 168 | 176 | 288 | 296 | 110 | 110 |
| 08rbl.523 | 226 | 228 | 284 | 284 | 216 | 236 | 288 | 294 | 170 | 192 | 280 | 298 | 110 | 110 |
| 08rbl.530 | 214 | 226 | 284 | 292 | 212 | 214 | 298 | 298 | 178 | 188 | 284 | 284 | 110 | 110 |
| 08rbl.531 | 238 | 254 | 286 | 290 | 210 | 210 | 266 | 270 | 172 | 196 | 292 | 302 | 110 | 110 |
| 08rbl.532 | 218 | 236 | 282 | 284 | 214 | 222 | 270 | 300 | 198 | 206 | 276 | 290 | 110 | 112 |
| 08rbl.534 | 216 | 228 | 282 | 282 | 208 | 208 | 258 | 284 | 186 | 194 | 290 | 302 | 110 | 110 |
| 08rbl.542 | 214 | 218 | 284 | 290 | 202 | 204 | 276 | 298 | 196 | 228 | 280 | 302 | 110 | 110 |
| 08rbl.553 | 218 | 232 | 290 | 292 | 214 | 230 | 256 | 290 | 150 | 206 | 300 | 302 | 110 | 110 |
| 08rbl.554 | 224 | 224 | 288 | 292 | 216 | 218 | 252 | 282 | 150 | 168 | 270 | 278 | 110 | 112 |
| 08rbl.565 | 224 | 250 | 286 | 286 | 204 | 232 | 292 | 308 | 170 | 170 | 290 | 310 | 110 | 112 |
| 08rbl.569 | 228 | 232 | 284 | 284 | 214 | 216 | 266 | 284 | 174 | 196 | 262 | 278 | 110 | 112 |
| 08rbl.573 | 212 | 214 | 284 | 286 | 204 | 210 | 270 | 286 | 170 | 190 | 282 | 282 | 110 | 110 |
| 08rbl.574 | 216 | 226 | 282 | 286 | 210 | 210 | 272 | 272 | 170 | 190 | 290 | 304 | 110 | 110 |
| 08rbl.608 | 216 | 226 | 286 | 288 | 218 | 222 | 272 | 274 | 170 | 170 | 288 | 290 | 110 | 110 |
| 08rbl.613 | 214 | 222 | 280 | 286 | 212 | 220 | 292 | 304 | 170 | 176 | 294 | 310 | 110 | 110 |
| 08rbl.614 | 214 | 222 | 288 | 292 | 218 | 230 | 296 | 304 | 170 | 202 | 274 | 294 | 110 | 110 |
| 08rbl.619 | 218 | 224 | 280 | 286 | 214 | 214 | 272 | 296 | 168 | 202 | 276 | 302 | 110 | 110 |
| 08rbl.620 | 214 | 220 | 290 | 292 | 204 | 222 | 286 | 292 | 188 | 190 | 282 | 282 | 110 | 112 |
| 08rbl.621 | 238 | 252 | 282 | 286 | 210 | 212 | 298 | 302 | 196 | 206 | 282 | 282 | 110 | 112 |
| 08rbl.624 | 214 | 224 | 286 | 292 | 212 | 214 | 310 | 310 | 150 | 222 | 266 | 290 | 110 | 110 |
| 08rbl.625 | 224 | 224 | 286 | 290 | 208 | 208 | 298 | 298 | 150 | 170 | 268 | 276 | 110 | 110 |
| 08rbl.628 | 212 | 218 | 286 | 286 | 202 | 214 | 288 | 292 | 170 | 208 | 276 | 284 | 110 | 110 |
| 08rbl.629 | 214 | 218 | 282 | 290 | 214 | 214 | 272 | 290 | 170 | 196 | 288 | 302 | 110 | 110 |
| 09rbl.001 | 212 | 212 | 290 | 290 | 218 | 222 | 256 | 264 | 200 | 208 | 274 | 282 | 110 | 110 |
| 09rbl.004 | 218 | 224 | 282 | 290 | 214 | 216 | 272 | 288 | 150 | 170 | 270 | 280 | 110 | 112 |

|           |     |     |     |     |     |     |     |     |     |     |     |     |     |     |
|-----------|-----|-----|-----|-----|-----|-----|-----|-----|-----|-----|-----|-----|-----|-----|
| 09rbl.005 | 214 | 228 | 282 | 286 | 212 | 236 | 298 | 310 | 170 | 196 | 278 | 290 | 110 | 110 |
| 09rbl.007 | 218 | 224 | 280 | 290 | 212 | 218 | 280 | 298 | 178 | 214 | 284 | 290 | 112 | 112 |
| 09rbl.009 | 228 | 228 | 284 | 286 | 210 | 218 | 220 | 284 | 198 | 208 | 284 | 288 | 110 | 110 |
| 09rbl.013 | 224 | 224 | 282 | 284 | 214 | 216 | 262 | 314 | 150 | 200 | 284 | 296 | 110 | 114 |
| 09rbl.014 | 214 | 226 | 284 | 284 | 210 | 222 | 300 | 300 | 150 | 150 | 296 | 300 | 110 | 110 |
| 09rbl.018 | 226 | 228 | 284 | 284 | 214 | 218 | 254 | 298 | 150 | 172 | 266 | 274 | 110 | 110 |
| 09rbl.026 | 226 | 226 | 288 | 290 | 214 | 232 | 262 | 294 | 170 | 194 | 276 | 284 | 110 | 112 |
| 09rbl.030 | 218 | 228 | 286 | 290 | 212 | 218 | 282 | 294 | 150 | 214 | 276 | 294 | 110 | 110 |
| 09rbl.031 | 228 | 228 | 284 | 288 | 214 | 218 | 260 | 294 | 168 | 202 | 278 | 300 | 110 | 112 |
| 09rbl.032 | 224 | 224 | 284 | 290 | 214 | 230 | 260 | 314 | 150 | 182 | 282 | 296 | 110 | 114 |
| 09rbl.033 | 224 | 226 | 286 | 288 | 212 | 214 | 256 | 276 | 170 | 192 | 286 | 300 | 110 | 110 |
| 09rbl.036 | 224 | 224 | 282 | 284 | 214 | 218 | 294 | 298 | 150 | 150 | 276 | 300 | 110 | 112 |
| 09rbl.040 | 224 | 224 | 282 | 282 | 208 | 208 | 278 | 300 | 192 | 214 | 264 | 276 | 110 | 110 |
| 09rbl.043 | 216 | 226 | 282 | 286 | 218 | 218 | 254 | 288 | 174 | 196 | 288 | 294 | 112 | 112 |
| 09rbl.045 | 224 | 228 | 282 | 284 | 214 | 228 | 286 | 314 | 200 | 202 | 280 | 298 | 110 | 114 |
| 09rbl.047 | 214 | 226 | 286 | 286 | 210 | 218 | 254 | 298 | 174 | 186 | 288 | 298 | 110 | 110 |
| 09rbl.048 | 214 | 224 | 282 | 282 | 218 | 218 | 260 | 288 | 174 | 196 | 286 | 294 | 112 | 112 |
| 09rbl.082 | 214 | 252 | 282 | 282 | 216 | 222 | 262 | 298 | 166 | 168 | 292 | 296 | 110 | 110 |
| 09rbl.086 | 222 | 222 | 282 | 298 | 214 | 214 | 282 | 286 | 174 | 206 | 276 | 304 | 110 | 112 |
| 09rbl.092 | 228 | 228 | 286 | 290 | 210 | 212 | 282 | 298 | 170 | 190 | 272 | 276 | 110 | 110 |
| 09rbl.105 | 224 | 232 | 290 | 290 | 214 | 214 | 288 | 298 | 170 | 200 | 274 | 296 | 110 | 110 |
| 09rbl.109 | 222 | 224 | 282 | 286 | 214 | 218 | 296 | 296 | 150 | 186 | 278 | 282 | 110 | 110 |
| 09rbl.111 | 214 | 232 | 282 | 282 | 210 | 212 | 290 | 294 | 170 | 200 | 278 | 294 | 110 | 110 |
| 09rbl.112 | 228 | 252 | 282 | 292 | 218 | 218 | 266 | 288 | 172 | 182 | 276 | 292 | 110 | 112 |
| 09rbl.113 | 224 | 252 | 290 | 290 | 218 | 218 | 288 | 312 | 168 | 194 | 288 | 290 | 110 | 110 |
| 09rbl.117 | 228 | 228 | 282 | 282 | 214 | 236 | 276 | 310 | 192 | 214 | 284 | 300 | 110 | 110 |
| 09rbl.118 | 222 | 228 | 290 | 290 | 214 | 218 | 256 | 288 | 168 | 172 | 284 | 302 | 110 | 110 |
| 09rbl.121 | 214 | 214 | 282 | 286 | 214 | 216 | 272 | 282 | 150 | 178 | 262 | 268 | 110 | 110 |
| 09rbl.123 | 222 | 228 | 282 | 282 | 214 | 218 | 276 | 282 | 214 | 216 | 266 | 282 | 110 | 110 |
| 09rbl.125 | 214 | 224 | 280 | 282 | 214 | 216 | 284 | 296 | 168 | 202 | 280 | 300 | 110 | 110 |
| 09rbl.133 | 224 | 224 | 286 | 290 | 210 | 218 | 282 | 294 | 188 | 190 | 274 | 296 | 110 | 110 |
| 09rbl.134 | 218 | 224 | 286 | 288 | 212 | 216 | 260 | 308 | 150 | 194 | 276 | 288 | 110 | 112 |
| 09rbl.137 | 214 | 214 | 282 | 292 | 214 | 218 | 252 | 298 | 202 | 224 | 294 | 302 | 112 | 114 |
| 09rbl.139 | 224 | 226 | 286 | 290 | 214 | 216 | 252 | 278 | 206 | 212 | 272 | 278 | 110 | 110 |
| 09rbl.153 | 214 | 226 | 286 | 290 | 214 | 214 | 272 | 272 | 168 | 214 | 280 | 302 | 110 | 112 |
| 09rbl.157 | 212 | 228 | 282 | 290 | 214 | 214 | 272 | 282 | 190 | 206 | 266 | 286 | 110 | 110 |
| 09rbl.159 | 222 | 226 | 282 | 284 | 202 | 212 | 288 | 290 | 194 | 206 | 274 | 284 | 110 | 112 |

|           |     |     |     |     |     |     |     |     |     |     |     |     |     |     |
|-----------|-----|-----|-----|-----|-----|-----|-----|-----|-----|-----|-----|-----|-----|-----|
| 09rbl.167 | 214 | 226 | 286 | 290 | 218 | 230 | 282 | 298 | 170 | 222 | 276 | 278 | 110 | 112 |
| 09rbl.168 | 214 | 226 | 286 | 288 | 214 | 218 | 256 | 288 | 168 | 204 | 284 | 294 | 110 | 112 |
| 09rbl.170 | 228 | 238 | 284 | 290 | 214 | 214 | 284 | 292 | 166 | 206 | 272 | 286 | 110 | 110 |
| 09rbl.171 | 224 | 226 | 284 | 292 | 210 | 218 | 286 | 312 | 150 | 190 | 288 | 294 | 110 | 110 |
| 09rbl.173 | 224 | 238 | 282 | 284 | 208 | 218 | 296 | 310 | 172 | 222 | 274 | 288 | 110 | 110 |
| 09rbl.186 | 224 | 232 | 284 | 286 | 212 | 218 | 252 | 296 | 196 | 220 | 274 | 292 | 110 | 112 |
| 09rbl.190 | 214 | 238 | 282 | 290 | 218 | 222 | 274 | 284 | 168 | 210 | 282 | 292 | 112 | 112 |
| 09rbl.203 | 224 | 224 | 282 | 290 | 218 | 220 | 252 | 264 | 174 | 198 | 292 | 294 | 110 | 110 |
| 09rbl.207 | 222 | 226 | 282 | 286 | 204 | 212 | 272 | 310 | 166 | 172 | 266 | 288 | 110 | 110 |
| 09rbl.209 | 224 | 224 | 284 | 286 | 212 | 224 | 280 | 286 | 168 | 168 | 262 | 288 | 110 | 110 |
| 09rbl.211 | 212 | 252 | 290 | 292 | 212 | 214 | 264 | 284 | 208 | 224 | 278 | 296 | 110 | 110 |
| 09rbl.214 | 224 | 226 | 282 | 284 | 202 | 212 | 274 | 288 | 170 | 192 | 276 | 280 | 110 | 110 |
| 09rbl.219 | 214 | 224 | 282 | 288 | 214 | 214 | 274 | 308 | 192 | 222 | 274 | 310 | 112 | 112 |
| 09rbl.222 | 224 | 224 | 284 | 286 | 212 | 214 | 300 | 300 | 186 | 206 | 286 | 286 | 110 | 110 |
| 09rbl.228 | 214 | 224 | 282 | 288 | 212 | 214 | 304 | 314 | 170 | 184 | 274 | 274 | 110 | 110 |
| 09rbl.232 | 224 | 226 | 282 | 286 | 212 | 218 | 288 | 298 | 166 | 194 | 268 | 276 | 110 | 110 |
| 09rbl.233 | 222 | 222 | 282 | 288 | 204 | 210 | 292 | 300 | 168 | 194 | 288 | 288 | 110 | 110 |
| 09rbl.234 | 224 | 224 | 284 | 290 | 210 | 222 | 274 | 304 | 172 | 214 | 302 | 302 | 110 | 110 |
| 09rbl.235 | 222 | 224 | 282 | 284 | 214 | 222 | 248 | 284 | 162 | 198 | 270 | 284 | 110 | 112 |
| 09rbl.244 | 214 | 246 | 290 | 290 | 214 | 218 | 248 | 294 | 162 | 166 | 270 | 282 | 110 | 112 |
| 09rbl.245 | 224 | 228 | 290 | 290 | 212 | 230 | 288 | 294 | 196 | 216 | 262 | 300 | 110 | 110 |
| 09rbl.248 | 214 | 224 | 284 | 290 | 210 | 214 | 272 | 300 | 172 | 190 | 282 | 294 | 110 | 110 |
| 09rbl.253 | 214 | 230 | 282 | 284 | 202 | 218 | 286 | 292 | 168 | 196 | 280 | 290 | 110 | 112 |
| 09rbl.254 | 224 | 248 | 282 | 286 | 214 | 230 | 274 | 294 | 166 | 210 | 274 | 276 | 110 | 110 |
| 09rbl.256 | 222 | 224 | 282 | 282 | 216 | 216 | 272 | 300 | 170 | 194 | 274 | 276 | 110 | 110 |
| 09rbl.266 | 212 | 238 | 284 | 288 | 212 | 214 | 254 | 290 | 170 | 178 | 280 | 288 | 110 | 112 |
| 09rbl.269 | 218 | 228 | 282 | 290 | 216 | 220 | 284 | 302 | 180 | 198 | 270 | 270 | 110 | 110 |
| 09rbl.270 | 228 | 244 | 282 | 284 | 208 | 214 | 298 | 298 | 168 | 204 | 266 | 284 | 110 | 112 |
| 09rbl.276 | 224 | 224 | 286 | 288 | 218 | 218 | 270 | 270 | 186 | 196 | 268 | 268 | 110 | 110 |
| 09rbl.284 | 214 | 248 | 282 | 290 | 210 | 214 | 256 | 262 | 168 | 170 | 284 | 286 | 110 | 112 |
| 09rbl.289 | 218 | 224 | 284 | 290 | 218 | 218 | 268 | 284 | 172 | 172 | 276 | 288 | 110 | 110 |
| 09rbl.295 | 214 | 222 | 282 | 290 | 210 | 218 | 288 | 302 | 204 | 204 | 284 | 286 | 110 | 112 |
| 09rbl.297 | 222 | 238 | 282 | 284 | 210 | 212 | 286 | 286 | 190 | 214 | 274 | 286 | 110 | 110 |
| 09rbl.299 | 216 | 232 | 286 | 290 | 214 | 216 | 294 | 302 | 196 | 224 | 286 | 286 | 110 | 112 |
| 09rbl.309 | 218 | 228 | 286 | 286 | 216 | 236 | 272 | 290 | 166 | 196 | 286 | 298 | 110 | 110 |
| 09rbl.314 | 222 | 224 | 282 | 282 | 212 | 232 | 272 | 284 | 188 | 206 | 282 | 298 | 110 | 112 |
| 09rbl.316 | 212 | 224 | 284 | 292 | 214 | 232 | 282 | 290 | 180 | 202 | 280 | 292 | 110 | 110 |

|           |     |     |     |     |     |     |     |     |     |     |     |     |     |     |
|-----------|-----|-----|-----|-----|-----|-----|-----|-----|-----|-----|-----|-----|-----|-----|
| 09rbl.319 | 222 | 224 | 286 | 290 | 210 | 218 | 272 | 294 | 150 | 172 | 276 | 298 | 110 | 110 |
| 09rbl.320 | 222 | 226 | 286 | 288 | 214 | 222 | 266 | 308 | 176 | 196 | 282 | 292 | 110 | 110 |
| 09rbl.321 | 222 | 224 | 282 | 282 | 214 | 222 | 254 | 254 | 196 | 208 | 274 | 286 | 110 | 110 |
| 09rbl.323 | 212 | 226 | 282 | 290 | 218 | 222 | 290 | 304 | 172 | 200 | 266 | 286 | 110 | 110 |
| 09rbl.327 | 214 | 238 | 286 | 288 | 210 | 212 | 272 | 288 | 168 | 226 | 268 | 284 | 110 | 110 |
| 09rbl.331 | 242 | 244 | 282 | 284 | 208 | 232 | 272 | 292 | 166 | 170 | 282 | 288 | 110 | 112 |
| 09rbl.333 | 218 | 224 | 282 | 290 | 204 | 218 | 278 | 286 | 174 | 192 | 262 | 292 | 110 | 112 |
| 09rbl.350 | 224 | 256 | 282 | 288 | 212 | 226 | 290 | 306 | 170 | 178 | 274 | 288 | 110 | 110 |
| 09rbl.364 | 214 | 226 | 282 | 284 | 212 | 214 | 280 | 280 | 202 | 206 | 284 | 290 | 110 | 112 |
| 09rbl.371 | 214 | 224 | 286 | 290 | 218 | 230 | 268 | 294 | 192 | 196 | 268 | 300 | 110 | 110 |
| 09rbl.372 | 222 | 222 | 284 | 288 | 214 | 222 | 252 | 274 | 168 | 186 | 288 | 300 | 110 | 112 |
| 09rbl.380 | 212 | 236 | 282 | 286 | 212 | 214 | 256 | 272 | 170 | 172 | 278 | 282 | 110 | 110 |
| 09rbl.385 | 214 | 222 | 284 | 288 | 212 | 218 | 294 | 304 | 166 | 204 | 278 | 302 | 110 | 110 |
| 09rbl.391 | 214 | 218 | 282 | 286 | 216 | 222 | 304 | 312 | 180 | 194 | 266 | 300 | 110 | 110 |
| 09rbl.394 | 232 | 242 | 286 | 288 | 212 | 214 | 272 | 292 | 150 | 196 | 266 | 282 | 110 | 112 |
| 09rbl.401 | 214 | 224 | 286 | 286 | 214 | 214 | 284 | 284 | 204 | 204 | 274 | 300 | 110 | 112 |
| 09rbl.406 | 212 | 232 | 282 | 292 | 214 | 218 | 252 | 300 | 170 | 204 | 276 | 288 | 110 | 112 |
| 09rbl.413 | 228 | 238 | 290 | 290 | 216 | 218 | 256 | 300 | 162 | 190 | 284 | 296 | 110 | 110 |
| 09rbl.415 | 212 | 228 | 282 | 284 | 214 | 218 | 296 | 302 | 168 | 202 | 290 | 298 | 110 | 110 |
| 09rbl.418 | 232 | 232 | 286 | 290 | 214 | 214 | 300 | 304 | 194 | 214 | 266 | 266 | 110 | 110 |
| 09rbl.420 | 224 | 226 | 282 | 284 | 212 | 218 | 270 | 290 | 170 | 204 | 278 | 292 | 110 | 112 |
| 09rbl.425 | 228 | 232 | 282 | 288 | 202 | 202 | 302 | 304 | 202 | 206 | 294 | 296 | 110 | 112 |
| 09rbl.434 | 224 | 232 | 282 | 290 | 212 | 216 | 284 | 292 | 168 | 210 | 276 | 282 | 110 | 110 |
| 09rbl.435 | 218 | 226 | 284 | 286 | 206 | 218 | 296 | 298 | 170 | 170 | 268 | 300 | 110 | 110 |
| 09rbl.440 | 224 | 226 | 282 | 290 | 214 | 230 | 274 | 274 | 198 | 198 | 290 | 298 | 110 | 110 |
| 09rbl.442 | 220 | 232 | 286 | 290 | 210 | 214 | 268 | 306 | 150 | 186 | 290 | 290 | 110 | 110 |
| 09rbl.447 | 222 | 228 | 286 | 286 | 214 | 214 | 264 | 292 | 192 | 208 | 264 | 282 | 110 | 110 |
| 09rbl.453 | 226 | 234 | 290 | 290 | 202 | 214 | 286 | 294 | 202 | 206 | 276 | 278 | 110 | 110 |
| 09rbl.455 | 214 | 244 | 284 | 286 | 204 | 220 | 278 | 292 | 196 | 196 | 276 | 292 | 110 | 110 |
| 09rbl.460 | 226 | 238 | 282 | 290 | 216 | 232 | 300 | 304 | 170 | 172 | 282 | 300 | 110 | 114 |
| 09rbl.462 | 212 | 222 | 290 | 290 | 214 | 214 | 274 | 290 | 168 | 212 | 292 | 302 | 110 | 110 |
| 09rbl.463 | 224 | 232 | 282 | 290 | 212 | 214 | 276 | 296 | 192 | 202 | 282 | 288 | 110 | 112 |
| 09rbl.466 | 214 | 222 | 282 | 282 | 202 | 214 | 304 | 304 | 168 | 202 | 286 | 300 | 110 | 110 |
| 09rbl.468 | 228 | 234 | 282 | 290 | 214 | 218 | 300 | 300 | 150 | 150 | 280 | 298 | 110 | 112 |
| 09rbl.476 | 214 | 222 | 284 | 290 | 216 | 218 | 256 | 302 | 172 | 172 | 284 | 294 | 110 | 112 |
| 09rbl.490 | 224 | 226 | 282 | 290 | 208 | 214 | 290 | 294 | 196 | 196 | 270 | 274 | 110 | 112 |
| 09rbl.494 | 222 | 230 | 282 | 286 | 204 | 216 | 272 | 304 | 170 | 184 | 282 | 294 | 110 | 110 |

|           |     |     |     |     |     |     |     |     |     |     |     |     |     |     |
|-----------|-----|-----|-----|-----|-----|-----|-----|-----|-----|-----|-----|-----|-----|-----|
| 09rbl.501 | 224 | 224 | 286 | 290 | 212 | 218 | 264 | 288 | 200 | 200 | 274 | 292 | 110 | 110 |
| 09rbl.503 | 214 | 222 | 290 | 290 | 210 | 218 | 288 | 294 | 170 | 176 | 286 | 286 | 110 | 110 |
| 09rbl.510 | 254 | 254 | 282 | 286 | 208 | 214 | 266 | 286 | 172 | 196 | 266 | 302 | 110 | 110 |
| 09rbl.511 | 224 | 226 | 286 | 290 | 214 | 222 | 258 | 308 | 168 | 170 | 276 | 298 | 110 | 114 |
| 09rbl.514 | 224 | 228 | 282 | 286 | 204 | 218 | 298 | 308 | 172 | 202 | 268 | 300 | 110 | 114 |
| 09rbl.516 | 222 | 226 | 282 | 290 | 208 | 210 | 274 | 288 | 176 | 196 | 292 | 298 | 110 | 112 |
| 09rbl.518 | 212 | 218 | 286 | 290 | 212 | 230 | 266 | 282 | 196 | 202 | 292 | 302 | 110 | 112 |
| 10rbl.001 | 214 | 232 | 282 | 290 | 218 | 218 | 252 | 260 | 174 | 208 | 272 | 288 | 110 | 112 |
| 10rbl.004 | 226 | 252 | 290 | 290 | 218 | 236 | 256 | 272 | 192 | 194 | 272 | 278 | 110 | 110 |
| 10rbl.006 | 226 | 228 | 288 | 292 | 218 | 218 | 220 | 292 | 188 | 192 | 278 | 290 | 110 | 112 |
| 10rbl.007 | 224 | 232 | 286 | 290 | 214 | 218 | 272 | 276 | 170 | 192 | 276 | 288 | 110 | 110 |
| 10rbl.008 | 222 | 232 | 282 | 288 | 218 | 236 | 256 | 294 | 204 | 206 | 272 | 278 | 110 | 112 |
| 10rbl.016 | 222 | 226 | 288 | 288 | 218 | 232 | 290 | 292 | 192 | 194 | 272 | 278 | 110 | 112 |
| 10rbl.017 | 226 | 226 | 286 | 286 | 214 | 218 | 272 | 288 | 170 | 206 | 278 | 288 | 110 | 112 |
| 10rbl.018 | 226 | 228 | 290 | 290 | 218 | 218 | 294 | 312 | 192 | 192 | 278 | 288 | 110 | 110 |
| 10rbl.019 | 218 | 230 | 282 | 286 | 212 | 216 | 292 | 302 | 174 | 208 | 272 | 284 | 110 | 110 |
| 10rbl.021 | 224 | 230 | 282 | 290 | 212 | 214 | 296 | 300 | 178 | 208 | 268 | 288 | 110 | 110 |
| 10rbl.028 | 214 | 224 | 282 | 282 | 208 | 212 | 220 | 294 | 178 | 178 | 270 | 280 | 110 | 110 |
| 10rbl.031 | 222 | 236 | 282 | 290 | 216 | 218 | 290 | 290 | 168 | 226 | 266 | 278 | 110 | 112 |
| 10rbl.035 | 244 | 252 | 292 | 292 | 220 | 232 | 274 | 308 | 170 | 200 | 288 | 302 | 110 | 110 |
| 10rbl.038 | 224 | 228 | 282 | 282 | 204 | 210 | 290 | 296 | 194 | 196 | 288 | 298 | 110 | 110 |
| 10rbl.049 | 214 | 222 | 282 | 282 | 214 | 218 | 264 | 274 | 170 | 172 | 278 | 290 | 110 | 110 |
| 10rbl.056 | 216 | 252 | 282 | 286 | 216 | 218 | 260 | 300 | 150 | 190 | 268 | 286 | 112 | 112 |
| 10rbl.058 | 226 | 232 | 282 | 290 | 210 | 216 | 268 | 286 | 170 | 222 | 288 | 288 | 110 | 110 |
| 10rbl.060 | 224 | 228 | 282 | 282 | 216 | 222 | 294 | 294 | 170 | 208 | 286 | 286 | 110 | 110 |
| 10rbl.064 | 222 | 228 | 286 | 290 | 214 | 218 | 256 | 290 | 190 | 190 | 270 | 298 | 110 | 112 |
| 10rbl.065 | 218 | 232 | 282 | 282 | 216 | 222 | 294 | 302 | 184 | 212 | 274 | 296 | 110 | 112 |
| 10rbl.066 | 214 | 232 | 282 | 292 | 214 | 222 | 294 | 308 | 170 | 210 | 284 | 306 | 110 | 110 |
| 10rbl.067 | 224 | 230 | 288 | 288 | 210 | 212 | 290 | 298 | 190 | 190 | 286 | 290 | 110 | 110 |
| 10rbl.081 | 230 | 242 | 284 | 290 | 212 | 230 | 272 | 272 | 168 | 216 | 286 | 290 | 110 | 112 |
| 10rbl.082 | 224 | 252 | 282 | 290 | 210 | 214 | 272 | 294 | 174 | 206 | 272 | 276 | 110 | 112 |
| 10rbl.083 | 220 | 228 | 282 | 290 | 216 | 222 | 290 | 304 | 172 | 172 | 268 | 298 | 110 | 112 |
| 10rbl.084 | 218 | 222 | 286 | 286 | 214 | 232 | 274 | 286 | 150 | 170 | 290 | 292 | 110 | 110 |
| 10rbl.088 | 224 | 228 | 284 | 290 | 214 | 214 | 264 | 298 | 150 | 196 | 282 | 282 | 110 | 110 |
| 10rbl.091 | 214 | 236 | 282 | 290 | 214 | 218 | 270 | 280 | 170 | 202 | 280 | 296 | 110 | 110 |
| 10rbl.095 | 226 | 226 | 282 | 286 | 214 | 218 | 282 | 312 | 168 | 202 | 286 | 294 | 110 | 110 |
| 10rbl.099 | 222 | 242 | 282 | 286 | 214 | 214 | 286 | 304 | 172 | 194 | 268 | 270 | 110 | 110 |

|           |     |     |     |     |     |     |     |     |     |     |     |     |     |     |
|-----------|-----|-----|-----|-----|-----|-----|-----|-----|-----|-----|-----|-----|-----|-----|
| 10rbl.112 | 222 | 258 | 282 | 284 | 214 | 222 | 280 | 290 | 170 | 178 | 276 | 276 | 110 | 112 |
| 10rbl.115 | 214 | 230 | 282 | 290 | 208 | 214 | 256 | 292 | 150 | 198 | 274 | 284 | 110 | 112 |
| 10rbl.117 | 224 | 246 | 282 | 286 | 214 | 216 | 264 | 294 | 170 | 200 | 272 | 300 | 110 | 112 |
| 10rbl.122 | 212 | 212 | 282 | 290 | 202 | 212 | 272 | 298 | 172 | 194 | 268 | 298 | 110 | 112 |
| 10rbl.131 | 232 | 252 | 282 | 286 | 214 | 218 | 270 | 274 | 170 | 170 | 266 | 298 | 110 | 110 |
| 10rbl.133 | 212 | 226 | 282 | 282 | 214 | 218 | 266 | 268 | 198 | 202 | 300 | 308 | 110 | 110 |
| 10rbl.139 | 226 | 252 | 290 | 290 | 216 | 216 | 292 | 308 | 192 | 202 | 286 | 294 | 110 | 110 |
| 10rbl.141 | 214 | 224 | 282 | 290 | 214 | 216 | 284 | 298 | 194 | 194 | 284 | 286 | 110 | 110 |
| 10rbl.144 | 214 | 228 | 284 | 284 | 208 | 216 | 274 | 294 | 166 | 194 | 282 | 282 | 110 | 110 |
| 10rbl.150 | 226 | 228 | 284 | 292 | 210 | 212 | 220 | 264 | 188 | 198 | 276 | 284 | 110 | 110 |
| 10rbl.151 | 226 | 232 | 286 | 290 | 208 | 214 | 290 | 302 | 168 | 196 | 292 | 292 | 110 | 112 |
| 10rbl.155 | 214 | 224 | 292 | 292 | 212 | 212 | 272 | 306 | 216 | 216 | 270 | 286 | 110 | 110 |
| 10rbl.156 | 226 | 252 | 286 | 286 | 212 | 214 | 282 | 298 | 170 | 194 | 282 | 296 | 110 | 110 |
| 10rbl.159 | 214 | 228 | 284 | 284 | 216 | 218 | 286 | 286 | 192 | 216 | 288 | 292 | 110 | 112 |
| 10rbl.161 | 212 | 222 | 282 | 286 | 218 | 220 | 302 | 302 | 174 | 194 | 260 | 288 | 110 | 110 |
| 10rbl.162 | 214 | 228 | 282 | 292 | 216 | 218 | 260 | 296 | 170 | 196 | 276 | 294 | 110 | 110 |
| 10rbl.166 | 218 | 220 | 282 | 286 | 212 | 216 | 284 | 288 | 174 | 224 | 278 | 288 | 110 | 112 |
| 10rbl.168 | 246 | 250 | 284 | 284 | 204 | 214 | 266 | 272 | 152 | 220 | 284 | 290 | 110 | 112 |
| 10rbl.171 | 216 | 218 | 282 | 288 | 214 | 222 | 256 | 296 | 168 | 208 | 288 | 296 | 110 | 110 |
| 10rbl.172 | 214 | 224 | 286 | 290 | 210 | 210 | 280 | 294 | 170 | 174 | 278 | 282 | 106 | 110 |
| 10rbl.179 | 214 | 224 | 290 | 290 | 208 | 222 | 250 | 292 | 198 | 212 | 262 | 298 | 110 | 110 |
| 10rbl.182 | 224 | 236 | 282 | 302 | 212 | 218 | 286 | 296 | 170 | 170 | 280 | 286 | 110 | 110 |
| 10rbl.192 | 228 | 248 | 282 | 302 | 208 | 210 | 272 | 294 | 178 | 178 | 272 | 280 | 110 | 110 |
| 10rbl.200 | 230 | 252 | 282 | 290 | 214 | 218 | 256 | 266 | 168 | 194 | 268 | 290 | 110 | 110 |
| 10rbl.203 | 218 | 222 | 286 | 286 | 204 | 208 | 296 | 306 | 158 | 198 | 286 | 290 | 110 | 110 |
| 10rbl.208 | 222 | 248 | 282 | 286 | 212 | 218 | 270 | 294 | 190 | 194 | 276 | 290 | 112 | 112 |
| 10rbl.214 | 214 | 214 | 292 | 302 | 208 | 214 | 298 | 308 | 178 | 222 | 284 | 296 | 110 | 110 |
| 10rbl.215 | 214 | 214 | 282 | 284 | 212 | 212 | 250 | 250 | 168 | 172 | 280 | 284 | 110 | 112 |
| 10rbl.216 | 224 | 230 | 286 | 286 | 212 | 214 | 266 | 298 | 170 | 170 | 280 | 286 | 110 | 110 |
| 10rbl.220 | 222 | 224 | 282 | 282 | 210 | 220 | 256 | 288 | 170 | 174 | 286 | 294 | 110 | 110 |
| 10rbl.221 | 214 | 228 | 282 | 286 | 216 | 236 | 264 | 286 | 174 | 174 | 290 | 300 | 110 | 110 |
| 10rbl.224 | 224 | 232 | 286 | 286 | 202 | 214 | 282 | 296 | 204 | 204 | 266 | 284 | 110 | 110 |
| 10rbl.225 | 222 | 226 | 286 | 292 | 214 | 214 | 300 | 300 | 170 | 170 | 282 | 282 | 110 | 110 |
| 10rbl.227 | 230 | 236 | 282 | 290 | 210 | 214 | 272 | 280 | 172 | 190 | 282 | 296 | 110 | 112 |
| 10rbl.232 | 214 | 222 | 282 | 282 | 212 | 214 | 286 | 308 | 166 | 166 | 276 | 288 | 110 | 112 |
| 10rbl.233 | 224 | 232 | 286 | 290 | 202 | 216 | 250 | 308 | 150 | 176 | 274 | 282 | 110 | 112 |
| 10rbl.238 | 226 | 228 | 286 | 290 | 212 | 216 | 290 | 292 | 172 | 176 | 282 | 288 | 110 | 110 |

|           |     |     |     |     |     |     |     |     |     |     |     |     |     |     |
|-----------|-----|-----|-----|-----|-----|-----|-----|-----|-----|-----|-----|-----|-----|-----|
| 10rbl.240 | 214 | 228 | 286 | 290 | 208 | 216 | 250 | 288 | 176 | 196 | 282 | 286 | 110 | 110 |
| 10rbl.241 | 224 | 226 | 282 | 292 | 210 | 220 | 270 | 308 | 172 | 190 | 276 | 288 | 110 | 110 |
| 10rbl.242 | 224 | 228 | 286 | 290 | 208 | 212 | 250 | 302 | 170 | 196 | 270 | 274 | 110 | 110 |
| 10rbl.244 | 222 | 224 | 282 | 282 | 214 | 216 | 252 | 272 | 172 | 196 | 272 | 274 | 110 | 110 |
| 10rbl.246 | 218 | 228 | 288 | 288 | 214 | 218 | 288 | 310 | 194 | 196 | 284 | 290 | 110 | 110 |
| 10rbl.253 | 214 | 218 | 290 | 290 | 218 | 218 | 266 | 298 | 170 | 170 | 294 | 298 | 110 | 110 |
| 10rbl.257 | 222 | 222 | 282 | 286 | 218 | 218 | 274 | 302 | 166 | 208 | 272 | 274 | 110 | 110 |
| 10rbl.258 | 224 | 224 | 290 | 290 | 214 | 214 | 276 | 302 | 150 | 150 | 284 | 292 | 110 | 110 |
| 10rbl.265 | 228 | 244 | 282 | 286 | 202 | 210 | 284 | 292 | 200 | 210 | 272 | 294 | 110 | 110 |
| 10rbl.267 | 224 | 226 | 290 | 290 | 212 | 218 | 282 | 310 | 180 | 180 | 264 | 288 | 110 | 110 |
| 10rbl.276 | 216 | 218 | 286 | 290 | 204 | 228 | 270 | 298 | 190 | 194 | 284 | 284 | 110 | 110 |
| 10rbl.278 | 218 | 220 | 282 | 290 | 216 | 220 | 286 | 286 | 190 | 216 | 288 | 292 | 110 | 112 |
| 10rbl.282 | 222 | 222 | 286 | 290 | 210 | 214 | 288 | 298 | 172 | 172 | 280 | 290 | 110 | 112 |
| 10rbl.283 | 222 | 246 | 282 | 286 | 212 | 214 | 272 | 286 | 172 | 172 | 272 | 300 | 110 | 110 |
| 10rbl.284 | 214 | 224 | 282 | 282 | 218 | 236 | 268 | 308 | 174 | 206 | 282 | 282 | 110 | 110 |
| 10rbl.288 | 220 | 222 | 282 | 282 | 210 | 220 | 264 | 290 | 210 | 216 | 278 | 288 | 112 | 112 |
| 10rbl.297 | 214 | 226 | 282 | 286 | 218 | 218 | 286 | 294 | 190 | 222 | 284 | 294 | 110 | 110 |
| 10rbl.311 | 224 | 228 | 292 | 292 | 216 | 230 | 298 | 298 | 150 | 170 | 284 | 300 | 110 | 110 |
| 10rbl.316 | 218 | 218 | 284 | 284 | 214 | 214 | 264 | 272 | 190 | 200 | 284 | 300 | 110 | 144 |
| 10rbl.321 | 218 | 224 | 290 | 290 | 214 | 230 | 272 | 296 | 168 | 170 | 290 | 300 | 110 | 110 |
| 10rbl.324 | 224 | 224 | 286 | 290 | 212 | 218 | 266 | 266 | 162 | 168 | 278 | 282 | 110 | 110 |
| 10rbl.325 | 224 | 228 | 286 | 290 | 214 | 218 | 280 | 300 | 166 | 172 | 272 | 278 | 110 | 110 |
| 10rbl.326 | 224 | 226 | 282 | 292 | 208 | 216 | 268 | 286 | 150 | 188 | 298 | 298 | 110 | 110 |
| 10rbl.327 | 214 | 226 | 282 | 290 | 214 | 222 | 268 | 282 | 174 | 208 | 286 | 294 | 110 | 110 |
| 10rbl.330 | 216 | 226 | 284 | 284 | 214 | 216 | 266 | 270 | 204 | 204 | 284 | 284 | 110 | 114 |
| 10rbl.339 | 224 | 232 | 290 | 290 | 214 | 218 | 300 | 300 | 192 | 214 | 272 | 296 | 110 | 110 |
| 10rbl.340 | 218 | 236 | 282 | 288 | 214 | 218 | 286 | 300 | 186 | 190 | 288 | 298 | 110 | 110 |
| 10rbl.348 | 212 | 244 | 286 | 292 | 218 | 230 | 304 | 304 | 170 | 170 | 284 | 284 | 110 | 112 |
| 10rbl.350 | 214 | 214 | 282 | 282 | 212 | 222 | 298 | 312 | 170 | 206 | 276 | 292 | 110 | 110 |
| 10rbl.352 | 212 | 224 | 282 | 286 | 214 | 230 | 284 | 310 | 150 | 174 | 286 | 286 | 110 | 110 |
| 10rbl.358 | 212 | 212 | 286 | 290 | 214 | 218 | 286 | 300 | 202 | 202 | 0   | 0   | 110 | 112 |
| 10rbl.360 | 226 | 226 | 290 | 290 | 210 | 218 | 214 | 270 | 170 | 178 | 298 | 300 | 110 | 110 |
| 10rbl.361 | 226 | 232 | 282 | 290 | 210 | 210 | 278 | 284 | 178 | 222 | 300 | 308 | 110 | 110 |
| 10rbl.363 | 212 | 224 | 284 | 284 | 202 | 210 | 250 | 286 | 170 | 190 | 276 | 290 | 110 | 110 |
| 10rbl.365 | 214 | 226 | 284 | 290 | 202 | 222 | 282 | 298 | 170 | 212 | 266 | 302 | 84  | 110 |
| 10rbl.366 | 214 | 224 | 284 | 284 | 214 | 218 | 272 | 294 | 200 | 202 | 272 | 304 | 110 | 110 |
| 10rbl.367 | 220 | 232 | 288 | 290 | 210 | 218 | 298 | 306 | 150 | 170 | 268 | 284 | 110 | 114 |



|           |     |     |     |     |     |     |     |     |     |     |     |     |     |     |
|-----------|-----|-----|-----|-----|-----|-----|-----|-----|-----|-----|-----|-----|-----|-----|
| 10rbl.376 | 214 | 222 | 286 | 290 | 210 | 214 | 268 | 278 | 194 | 200 | 272 | 288 | 110 | 110 |
| 10rbl.382 | 214 | 226 | 290 | 290 | 210 | 214 | 286 | 296 | 174 | 174 | 282 | 300 | 110 | 110 |
| 10rbl.387 | 214 | 224 | 282 | 288 | 204 | 230 | 272 | 276 | 178 | 200 | 274 | 284 | 110 | 114 |
| 10rbl.393 | 214 | 226 | 290 | 290 | 218 | 220 | 284 | 310 | 168 | 200 | 278 | 278 | 110 | 110 |
| 10rbl.398 | 214 | 242 | 292 | 292 | 214 | 232 | 252 | 284 | 178 | 204 | 266 | 288 | 110 | 110 |
| 10rbl.424 | 218 | 224 | 290 | 290 | 210 | 222 | 250 | 290 | 150 | 180 | 288 | 288 | 110 | 110 |
| 10rbl.425 | 222 | 222 | 290 | 290 | 214 | 214 | 268 | 272 | 0   | 0   | 262 | 274 | 110 | 114 |
| 10rbl.427 | 216 | 228 | 292 | 292 | 214 | 218 | 278 | 302 | 150 | 150 | 280 | 296 | 110 | 114 |
| 10rbl.438 | 214 | 226 | 286 | 290 | 214 | 216 | 266 | 292 | 194 | 194 | 282 | 282 | 110 | 110 |
| 10rbl.442 | 222 | 232 | 284 | 290 | 214 | 214 | 286 | 290 | 220 | 222 | 278 | 302 | 110 | 112 |
| 10rbl.444 | 224 | 244 | 288 | 290 | 214 | 216 | 300 | 304 | 172 | 172 | 262 | 286 | 110 | 110 |
| 10rbl.450 | 228 | 244 | 286 | 290 | 204 | 222 | 288 | 288 | 170 | 216 | 270 | 284 | 110 | 110 |
| 10rbl.453 | 222 | 226 | 284 | 288 | 212 | 234 | 290 | 290 | 150 | 206 | 274 | 284 | 110 | 110 |
| 10rbl.456 | 214 | 228 | 284 | 284 | 212 | 214 | 272 | 306 | 174 | 190 | 286 | 290 | 110 | 112 |
| 10rbl.477 | 216 | 224 | 284 | 284 | 210 | 212 | 268 | 284 | 200 | 210 | 280 | 280 | 110 | 110 |
| 10rbl.478 | 224 | 232 | 286 | 286 | 216 | 236 | 220 | 298 | 150 | 178 | 272 | 300 | 110 | 110 |
| 11rbl.002 | 214 | 226 | 286 | 286 | 210 | 218 | 286 | 290 | 174 | 192 | 290 | 292 | 110 | 110 |
| 11rbl.004 | 222 | 252 | 290 | 290 | 0   | 0   | 272 | 290 | 202 | 206 | 270 | 304 | 110 | 110 |
| 11rbl.011 | 248 | 252 | 282 | 288 | 210 | 214 | 286 | 286 | 182 | 192 | 276 | 288 | 110 | 110 |
| 11rbl.021 | 224 | 224 | 282 | 286 | 208 | 218 | 274 | 284 | 168 | 188 | 294 | 298 | 110 | 110 |
| 11rbl.022 | 214 | 224 | 282 | 284 | 210 | 214 | 288 | 292 | 192 | 198 | 286 | 290 | 110 | 110 |
| 11rbl.030 | 236 | 242 | 282 | 286 | 202 | 214 | 252 | 302 | 200 | 200 | 298 | 300 | 110 | 114 |
| 11rbl.033 | 224 | 250 | 282 | 290 | 214 | 216 | 274 | 296 | 190 | 202 | 276 | 296 | 110 | 110 |
| 11rbl.034 | 214 | 224 | 286 | 286 | 214 | 222 | 268 | 300 | 168 | 196 | 288 | 296 | 110 | 114 |
| 11rbl.035 | 222 | 222 | 290 | 290 | 214 | 214 | 270 | 270 | 170 | 170 | 286 | 292 | 110 | 110 |
| 11rbl.036 | 214 | 244 | 284 | 284 | 212 | 218 | 266 | 270 | 188 | 206 | 274 | 282 | 110 | 110 |
| 11rbl.040 | 222 | 222 | 284 | 290 | 212 | 220 | 286 | 292 | 188 | 202 | 270 | 276 | 110 | 110 |
| 11rbl.041 | 214 | 224 | 282 | 286 | 214 | 218 | 262 | 312 | 210 | 210 | 276 | 292 | 110 | 112 |
| 11rbl.045 | 214 | 214 | 282 | 290 | 214 | 218 | 262 | 298 | 200 | 222 | 272 | 286 | 110 | 110 |
| 11rbl.046 | 224 | 228 | 282 | 282 | 204 | 214 | 256 | 264 | 166 | 202 | 272 | 288 | 110 | 110 |
| 11rbl.049 | 222 | 256 | 286 | 290 | 214 | 236 | 290 | 304 | 184 | 210 | 286 | 290 | 110 | 110 |
| 11rbl.055 | 228 | 228 | 284 | 286 | 212 | 214 | 288 | 292 | 202 | 210 | 278 | 304 | 110 | 112 |
| 11rbl.060 | 222 | 224 | 282 | 290 | 218 | 236 | 254 | 256 | 196 | 216 | 290 | 300 | 110 | 110 |
| 11rbl.064 | 224 | 226 | 282 | 282 | 222 | 230 | 264 | 304 | 210 | 212 | 274 | 280 | 110 | 114 |
| 11rbl.067 | 214 | 222 | 290 | 290 | 208 | 216 | 292 | 298 | 192 | 198 | 276 | 294 | 110 | 110 |
| 11rbl.076 | 224 | 230 | 282 | 284 | 212 | 218 | 284 | 296 | 210 | 210 | 272 | 288 | 110 | 110 |
| 11rbl.077 | 222 | 260 | 284 | 286 | 214 | 218 | 254 | 256 | 174 | 208 | 272 | 286 | 110 | 110 |

|           |     |     |     |     |     |     |     |     |     |     |     |     |     |     |
|-----------|-----|-----|-----|-----|-----|-----|-----|-----|-----|-----|-----|-----|-----|-----|
| 11rbl.086 | 228 | 228 | 284 | 302 | 208 | 214 | 280 | 290 | 150 | 180 | 272 | 284 | 110 | 110 |
| 11rbl.087 | 226 | 226 | 282 | 286 | 212 | 218 | 284 | 298 | 170 | 210 | 278 | 288 | 110 | 110 |
| 11rbl.094 | 214 | 236 | 286 | 290 | 202 | 218 | 296 | 298 | 180 | 196 | 280 | 280 | 110 | 112 |
| 11rbl.101 | 226 | 226 | 286 | 290 | 214 | 218 | 272 | 280 | 170 | 170 | 286 | 286 | 110 | 112 |
| 11rbl.105 | 212 | 224 | 286 | 290 | 214 | 232 | 264 | 286 | 168 | 222 | 284 | 290 | 112 | 112 |
| 11rbl.115 | 212 | 226 | 282 | 284 | 202 | 210 | 282 | 286 | 174 | 184 | 264 | 298 | 110 | 110 |
| 11rbl.119 | 214 | 218 | 282 | 286 | 212 | 212 | 252 | 292 | 150 | 150 | 278 | 284 | 110 | 110 |
| 11rbl.138 | 218 | 260 | 282 | 290 | 212 | 218 | 278 | 304 | 170 | 174 | 272 | 296 | 110 | 112 |
| 11rbl.147 | 224 | 230 | 282 | 282 | 214 | 222 | 290 | 292 | 206 | 206 | 272 | 284 | 110 | 110 |
| 11rbl.151 | 214 | 232 | 286 | 292 | 212 | 212 | 254 | 294 | 176 | 208 | 276 | 290 | 110 | 110 |
| 11rbl.158 | 212 | 224 | 292 | 292 | 222 | 222 | 294 | 304 | 168 | 208 | 272 | 284 | 110 | 110 |
| 11rbl.159 | 214 | 230 | 286 | 290 | 204 | 230 | 272 | 288 | 154 | 170 | 290 | 302 | 110 | 112 |
| 11rbl.163 | 212 | 226 | 282 | 290 | 202 | 222 | 292 | 298 | 180 | 198 | 268 | 280 | 110 | 112 |
| 11rbl.164 | 226 | 236 | 282 | 282 | 208 | 218 | 272 | 290 | 154 | 154 | 284 | 286 | 110 | 110 |
| 11rbl.171 | 214 | 224 | 284 | 288 | 220 | 236 | 256 | 296 | 150 | 168 | 292 | 296 | 110 | 110 |
| 11rbl.176 | 226 | 232 | 282 | 288 | 216 | 222 | 260 | 304 | 170 | 196 | 270 | 298 | 110 | 110 |
| 11rbl.178 | 224 | 224 | 282 | 282 | 202 | 204 | 272 | 302 | 204 | 214 | 284 | 292 | 110 | 110 |
| 11rbl.182 | 214 | 224 | 282 | 284 | 208 | 222 | 264 | 290 | 168 | 200 | 280 | 286 | 110 | 110 |
| 11rbl.185 | 212 | 214 | 282 | 288 | 214 | 218 | 300 | 300 | 200 | 216 | 266 | 284 | 110 | 110 |
| 11rbl.187 | 242 | 246 | 284 | 286 | 212 | 218 | 272 | 282 | 178 | 196 | 286 | 296 | 110 | 110 |
| 11rbl.189 | 218 | 228 | 282 | 290 | 218 | 230 | 256 | 264 | 170 | 216 | 276 | 288 | 110 | 114 |
| 11rbl.194 | 220 | 232 | 282 | 302 | 214 | 220 | 286 | 302 | 174 | 180 | 270 | 306 | 110 | 112 |
| 11rbl.195 | 224 | 232 | 284 | 290 | 214 | 218 | 294 | 310 | 170 | 178 | 256 | 296 | 110 | 112 |
| 11rbl.211 | 224 | 252 | 282 | 290 | 212 | 222 | 284 | 288 | 150 | 150 | 276 | 286 | 110 | 110 |
| 11rbl.212 | 224 | 232 | 288 | 290 | 214 | 218 | 264 | 268 | 194 | 224 | 272 | 278 | 110 | 114 |
| 11rbl.213 | 224 | 226 | 284 | 290 | 208 | 212 | 282 | 282 | 192 | 192 | 280 | 290 | 110 | 110 |
| 11rbl.215 | 230 | 230 | 282 | 286 | 212 | 218 | 268 | 288 | 174 | 192 | 280 | 290 | 110 | 110 |
| 11rbl.216 | 218 | 222 | 282 | 282 | 202 | 212 | 288 | 290 | 150 | 214 | 280 | 298 | 110 | 110 |
| 11rbl.217 | 212 | 214 | 282 | 290 | 210 | 214 | 280 | 302 | 218 | 220 | 286 | 292 | 110 | 110 |
| 11rbl.223 | 222 | 222 | 282 | 286 | 204 | 214 | 260 | 282 | 180 | 204 | 290 | 294 | 110 | 110 |
| 11rbl.225 | 222 | 236 | 282 | 290 | 214 | 214 | 252 | 304 | 170 | 202 | 284 | 298 | 110 | 110 |
| 11rbl.230 | 224 | 230 | 282 | 282 | 210 | 220 | 272 | 292 | 174 | 202 | 268 | 290 | 110 | 112 |
| 11rbl.233 | 214 | 230 | 290 | 290 | 214 | 218 | 264 | 272 | 166 | 204 | 288 | 310 | 110 | 110 |
| 11rbl.238 | 222 | 228 | 282 | 290 | 210 | 214 | 256 | 286 | 194 | 194 | 286 | 296 | 110 | 112 |
| 11rbl.245 | 224 | 248 | 286 | 290 | 208 | 216 | 268 | 302 | 150 | 150 | 268 | 276 | 110 | 110 |
| 11rbl.247 | 222 | 250 | 282 | 284 | 208 | 216 | 260 | 288 | 178 | 208 | 298 | 304 | 110 | 112 |
| 11rbl.252 | 212 | 244 | 282 | 290 | 202 | 222 | 272 | 288 | 168 | 192 | 272 | 284 | 110 | 110 |

|           |     |     |     |     |     |     |     |     |     |     |     |     |     |     |
|-----------|-----|-----|-----|-----|-----|-----|-----|-----|-----|-----|-----|-----|-----|-----|
| 11rbl.261 | 224 | 224 | 280 | 282 | 218 | 230 | 256 | 282 | 166 | 200 | 280 | 280 | 110 | 112 |
| 11rbl.263 | 214 | 222 | 282 | 284 | 208 | 232 | 260 | 272 | 174 | 202 | 290 | 302 | 110 | 112 |
| 11rbl.265 | 214 | 250 | 284 | 284 | 204 | 216 | 280 | 280 | 200 | 214 | 280 | 296 | 110 | 112 |
| 11rbl.271 | 222 | 236 | 280 | 282 | 216 | 230 | 280 | 298 | 166 | 196 | 282 | 286 | 110 | 114 |
| 11rbl.282 | 222 | 228 | 280 | 282 | 212 | 214 | 250 | 286 | 180 | 198 | 286 | 290 | 110 | 110 |
| 11rbl.287 | 214 | 224 | 282 | 282 | 210 | 212 | 276 | 302 | 172 | 172 | 284 | 290 | 110 | 112 |
| 11rbl.290 | 224 | 224 | 292 | 292 | 226 | 232 | 254 | 298 | 170 | 202 | 280 | 294 | 110 | 112 |
| 11rbl.293 | 214 | 224 | 282 | 290 | 208 | 218 | 272 | 282 | 192 | 198 | 286 | 304 | 110 | 110 |
| 11rbl.299 | 214 | 228 | 290 | 292 | 218 | 218 | 268 | 298 | 192 | 198 | 292 | 296 | 110 | 110 |
| 11rbl.302 | 228 | 252 | 282 | 286 | 214 | 228 | 284 | 284 | 196 | 196 | 276 | 280 | 110 | 110 |
| 11rbl.303 | 222 | 226 | 282 | 292 | 204 | 208 | 272 | 274 | 150 | 180 | 272 | 290 | 110 | 112 |
| 11rbl.309 | 224 | 230 | 282 | 290 | 214 | 236 | 270 | 296 | 168 | 210 | 272 | 284 | 110 | 110 |
| 11rbl.310 | 212 | 220 | 282 | 286 | 204 | 218 | 294 | 296 | 190 | 202 | 268 | 294 | 110 | 110 |
| 11rbl.312 | 214 | 218 | 286 | 290 | 214 | 236 | 274 | 292 | 202 | 206 | 286 | 304 | 110 | 110 |
| 11rbl.313 | 214 | 232 | 286 | 290 | 218 | 230 | 286 | 292 | 168 | 198 | 288 | 290 | 110 | 110 |
| 11rbl.317 | 226 | 230 | 282 | 284 | 214 | 236 | 286 | 306 | 196 | 200 | 284 | 296 | 110 | 112 |
| 11rbl.318 | 226 | 248 | 282 | 290 | 214 | 214 | 266 | 300 | 192 | 196 | 280 | 298 | 110 | 110 |
| 11rbl.320 | 226 | 236 | 282 | 282 | 214 | 214 | 278 | 310 | 150 | 184 | 288 | 300 | 110 | 110 |
| 11rbl.321 | 212 | 232 | 282 | 290 | 208 | 222 | 258 | 304 | 166 | 192 | 272 | 276 | 110 | 110 |
| 11rbl.331 | 214 | 232 | 282 | 290 | 216 | 222 | 252 | 288 | 192 | 196 | 290 | 290 | 110 | 110 |
| 11rbl.338 | 222 | 222 | 282 | 292 | 210 | 218 | 290 | 298 | 204 | 214 | 284 | 296 | 110 | 112 |
| 11rbl.341 | 218 | 222 | 290 | 290 | 214 | 222 | 272 | 292 | 168 | 176 | 280 | 300 | 110 | 112 |
| 11rbl.345 | 214 | 222 | 284 | 286 | 202 | 214 | 288 | 288 | 196 | 222 | 288 | 294 | 110 | 110 |
| 11rbl.346 | 224 | 228 | 282 | 292 | 214 | 218 | 268 | 272 | 150 | 172 | 300 | 300 | 110 | 112 |
| 11rbl.352 | 214 | 216 | 284 | 286 | 210 | 214 | 256 | 298 | 168 | 178 | 300 | 300 | 110 | 110 |
| 11rbl.354 | 246 | 246 | 286 | 286 | 210 | 218 | 290 | 294 | 150 | 204 | 284 | 284 | 110 | 110 |
| 11rbl.356 | 212 | 232 | 280 | 282 | 214 | 218 | 288 | 308 | 188 | 188 | 270 | 272 | 110 | 110 |
| 11rbl.360 | 222 | 226 | 282 | 284 | 212 | 212 | 286 | 288 | 190 | 198 | 286 | 292 | 110 | 110 |
| 11rbl.361 | 212 | 226 | 290 | 290 | 214 | 218 | 282 | 286 | 170 | 170 | 268 | 304 | 110 | 110 |
| 11rbl.367 | 212 | 214 | 282 | 286 | 214 | 222 | 256 | 288 | 216 | 216 | 276 | 284 | 110 | 112 |
| 11rbl.368 | 218 | 222 | 284 | 284 | 212 | 212 | 284 | 286 | 150 | 202 | 280 | 280 | 110 | 112 |
| 11rbl.375 | 224 | 232 | 282 | 282 | 214 | 214 | 290 | 298 | 200 | 200 | 272 | 286 | 110 | 110 |
| 11rbl.376 | 214 | 224 | 286 | 286 | 214 | 214 | 298 | 304 | 150 | 214 | 268 | 288 | 110 | 112 |
| 11rbl.390 | 224 | 228 | 282 | 286 | 216 | 220 | 260 | 270 | 168 | 168 | 294 | 300 | 110 | 114 |
| 11rbl.400 | 212 | 224 | 282 | 282 | 214 | 218 | 252 | 270 | 150 | 224 | 276 | 278 | 110 | 112 |
| 11rbl.404 | 222 | 222 | 286 | 290 | 202 | 210 | 296 | 296 | 174 | 218 | 264 | 272 | 110 | 110 |
| 11rbl.406 | 212 | 222 | 282 | 290 | 202 | 218 | 274 | 304 | 166 | 192 | 276 | 284 | 110 | 112 |

|           |     |     |     |     |     |     |     |     |     |     |     |     |     |     |
|-----------|-----|-----|-----|-----|-----|-----|-----|-----|-----|-----|-----|-----|-----|-----|
| 11rbl.411 | 222 | 254 | 290 | 292 | 218 | 236 | 298 | 304 | 204 | 204 | 278 | 292 | 110 | 110 |
| 11rbl.415 | 216 | 224 | 282 | 286 | 216 | 216 | 286 | 286 | 174 | 202 | 268 | 286 | 110 | 110 |
| 11rbl.421 | 218 | 224 | 290 | 290 | 210 | 214 | 248 | 298 | 150 | 210 | 270 | 298 | 110 | 112 |
| 11rbl.422 | 212 | 226 | 288 | 288 | 210 | 214 | 298 | 308 | 150 | 186 | 266 | 286 | 112 | 114 |
| 11rbl.429 | 222 | 232 | 286 | 290 | 214 | 220 | 288 | 294 | 170 | 192 | 292 | 300 | 110 | 112 |
| 11rbl.436 | 224 | 224 | 282 | 290 | 218 | 218 | 254 | 298 | 170 | 170 | 290 | 290 | 110 | 132 |
| 11rbl.441 | 222 | 244 | 290 | 290 | 210 | 214 | 272 | 286 | 200 | 224 | 268 | 282 | 110 | 110 |
| 11rbl.442 | 218 | 248 | 282 | 290 | 208 | 212 | 272 | 288 | 188 | 188 | 270 | 284 | 110 | 110 |
| 11rbl.448 | 216 | 228 | 282 | 284 | 208 | 214 | 290 | 306 | 170 | 180 | 292 | 294 | 110 | 112 |
| 11rbl.451 | 224 | 252 | 280 | 290 | 210 | 218 | 248 | 280 | 168 | 196 | 268 | 282 | 110 | 110 |
| 11rbl.452 | 214 | 254 | 290 | 290 | 210 | 214 | 294 | 304 | 168 | 168 | 282 | 292 | 112 | 114 |
| 11rbl.454 | 212 | 214 | 282 | 290 | 216 | 218 | 282 | 292 | 170 | 202 | 272 | 290 | 110 | 110 |
| 11rbl.463 | 216 | 232 | 282 | 286 | 206 | 210 | 282 | 286 | 190 | 208 | 268 | 282 | 110 | 110 |
| 11rbl.466 | 218 | 224 | 286 | 286 | 210 | 214 | 284 | 304 | 154 | 170 | 294 | 294 | 110 | 110 |
| 11rbl.469 | 214 | 248 | 286 | 288 | 222 | 222 | 290 | 290 | 190 | 196 | 296 | 296 | 110 | 112 |
| 11rbl.482 | 226 | 236 | 282 | 290 | 214 | 218 | 284 | 286 | 196 | 196 | 268 | 282 | 110 | 112 |
| 11rbl.491 | 224 | 248 | 282 | 292 | 214 | 222 | 252 | 298 | 198 | 204 | 284 | 288 | 110 | 112 |
| 11rbl.501 | 222 | 230 | 282 | 286 | 218 | 218 | 286 | 300 | 204 | 204 | 280 | 290 | 110 | 112 |
| 11rbl.502 | 224 | 226 | 290 | 290 | 206 | 214 | 278 | 286 | 196 | 214 | 282 | 290 | 110 | 110 |
| 11rbl.507 | 226 | 244 | 282 | 284 | 204 | 212 | 252 | 300 | 192 | 210 | 286 | 292 | 110 | 110 |
| 11rbl.510 | 224 | 224 | 282 | 286 | 204 | 216 | 274 | 310 | 202 | 210 | 0   | 0   | 110 | 110 |
| 11rbl.516 | 214 | 224 | 286 | 290 | 214 | 222 | 280 | 286 | 172 | 172 | 282 | 282 | 110 | 114 |
| 11rbl.521 | 218 | 224 | 282 | 286 | 218 | 218 | 262 | 292 | 196 | 210 | 284 | 288 | 110 | 110 |
| 11rbl.522 | 212 | 216 | 282 | 286 | 212 | 222 | 256 | 298 | 168 | 206 | 270 | 294 | 110 | 112 |
| 11rbl.529 | 212 | 216 | 286 | 290 | 208 | 212 | 294 | 302 | 178 | 194 | 276 | 290 | 110 | 110 |

**Supplemental Table 5.** Estimates of allelic richness estimated from 15 microsatellite loci for razorback sucker from Lake Mohave, Arizona and Nevada, from the years 1997-2011.

| Locus | 1997  | 1998  | 1999  | 2000  | 2001  | 2002  | 2003  | 2004  | 2005  | 2006  | 2007  | 2008  | 2009  | 2010  | 2011  |
|-------|-------|-------|-------|-------|-------|-------|-------|-------|-------|-------|-------|-------|-------|-------|-------|
| Xte1  | 2.00  | 2.00  | 2.00  | 2.00  | 2.00  | 2.00  | 2.00  | 2.00  | 2.00  | 2.00  | 2.00  | 2.00  | 2.00  | 2.00  | 2.00  |
| Xte2  | 4.00  | 4.00  | 3.95  | 3.00  | 4.00  | 4.00  | 3.98  | 4.00  | 4.00  | 4.00  | 4.00  | 4.00  | 4.00  | 4.00  | 5.00  |
| Xte7  | 19.82 | 20.87 | 19.82 | 14.87 | 19.92 | 17.85 | 17.92 | 14.90 | 17.87 | 17.87 | 13.95 | 15.87 | 16.92 | 17.97 | 19.92 |
| Xte8  | 19.95 | 19.95 | 18.97 | 21.90 | 22.87 | 18.95 | 21.95 | 20.90 | 18.95 | 21.92 | 18.92 | 21.87 | 21.90 | 19.90 | 21.92 |
| Xte10 | 10.00 | 10.00 | 10.00 | 11.97 | 11.00 | 10.97 | 11.98 | 11.98 | 12.00 | 11.95 | 10.98 | 12.00 | 9.98  | 10.98 | 10.97 |
| Xte11 | 17.87 | 15.87 | 16.92 | 17.88 | 17.95 | 19.87 | 14.87 | 16.90 | 16.87 | 14.97 | 14.92 | 17.85 | 16.83 | 16.87 | 13.95 |
| Xte12 | 12.90 | 11.97 | 13.92 | 10.97 | 12.92 | 10.98 | 13.97 | 11.95 | 10.98 | 11.97 | 10.98 | 12.98 | 13.93 | 9.97  | 13.95 |
| Xte16 | 31.77 | 26.92 | 25.92 | 30.00 | 30.00 | 26.92 | 29.95 | 23.98 | 27.95 | 25.87 | 29.82 | 26.97 | 27.87 | 25.90 | 30.90 |
| Xte17 | 21.87 | 19.95 | 19.92 | 19.97 | 19.95 | 21.95 | 16.97 | 21.90 | 20.97 | 19.95 | 18.90 | 19.97 | 20.90 | 18.95 | 20.97 |
| Xte18 | 8.98  | 8.98  | 8.95  | 8.00  | 7.98  | 7.98  | 7.00  | 7.00  | 8.97  | 8.00  | 9.97  | 10.00 | 7.97  | 7.00  | 8.00  |
| Xte19 | 17.90 | 15.92 | 15.93 | 15.97 | 16.97 | 14.95 | 15.97 | 14.97 | 15.92 | 15.95 | 17.92 | 17.97 | 16.90 | 14.95 | 15.97 |
| Xte20 | 29.92 | 33.92 | 35.80 | 35.97 | 31.95 | 34.92 | 34.87 | 34.95 | 34.90 | 33.85 | 35.90 | 35.91 | 33.95 | 30.98 | 32.90 |
| Xte22 | 34.92 | 31.98 | 28.90 | 34.87 | 32.95 | 32.87 | 32.97 | 31.95 | 30.95 | 32.90 | 30.92 | 32.97 | 31.95 | 32.87 | 31.90 |
| Xte24 | 22.00 | 22.95 | 23.93 | 23.98 | 22.95 | 23.87 | 23.90 | 22.97 | 23.90 | 24.97 | 23.92 | 24.00 | 22.95 | 24.93 | 23.95 |
| Xte25 | 4.95  | 3.98  | 3.00  | 4.00  | 3.00  | 3.00  | 4.00  | 3.00  | 3.00  | 4.00  | 3.00  | 3.00  | 3.00  | 5.93  | 3.98  |

**Supplemental Table 6.** Estimates of gene diversity estimated from 15 microsatellite loci for razorback sucker from Lake Mohave, Arizona and Nevada, from the years 1997-2011.

| Locus | 1997  | 1998  | 1999  | 2000  | 2001  | 2002  | 2003  | 2004  | 2005  | 2006  | 2007  | 2008  | 2009  | 2010  | 2011  |
|-------|-------|-------|-------|-------|-------|-------|-------|-------|-------|-------|-------|-------|-------|-------|-------|
| Xte1  | 0.316 | 0.220 | 0.321 | 0.132 | 0.200 | 0.250 | 0.279 | 0.146 | 0.146 | 0.080 | 0.187 | 0.226 | 0.326 | 0.279 | 0.301 |
| Xte2  | 0.171 | 0.150 | 0.104 | 0.148 | 0.112 | 0.172 | 0.171 | 0.112 | 0.178 | 0.171 | 0.193 | 0.157 | 0.192 | 0.226 | 0.165 |
| Xte7  | 0.731 | 0.722 | 0.686 | 0.546 | 0.717 | 0.699 | 0.758 | 0.553 | 0.589 | 0.635 | 0.641 | 0.609 | 0.732 | 0.739 | 0.723 |
| Xte8  | 0.900 | 0.898 | 0.885 | 0.910 | 0.912 | 0.907 | 0.904 | 0.907 | 0.906 | 0.894 | 0.895 | 0.904 | 0.914 | 0.883 | 0.892 |
| Xte10 | 0.859 | 0.857 | 0.861 | 0.858 | 0.839 | 0.842 | 0.849 | 0.854 | 0.863 | 0.867 | 0.857 | 0.874 | 0.842 | 0.847 | 0.853 |
| Xte11 | 0.882 | 0.869 | 0.876 | 0.865 | 0.871 | 0.877 | 0.865 | 0.864 | 0.858 | 0.866 | 0.866 | 0.888 | 0.870 | 0.855 | 0.866 |
| Xte12 | 0.815 | 0.795 | 0.821 | 0.751 | 0.837 | 0.823 | 0.850 | 0.838 | 0.828 | 0.861 | 0.828 | 0.863 | 0.827 | 0.806 | 0.826 |
| Xte16 | 0.941 | 0.934 | 0.924 | 0.933 | 0.935 | 0.934 | 0.932 | 0.922 | 0.935 | 0.930 | 0.932 | 0.937 | 0.937 | 0.932 | 0.940 |
| Xte17 | 0.869 | 0.894 | 0.891 | 0.891 | 0.912 | 0.907 | 0.879 | 0.858 | 0.888 | 0.887 | 0.860 | 0.887 | 0.874 | 0.904 | 0.903 |
| Xte18 | 0.800 | 0.792 | 0.797 | 0.844 | 0.817 | 0.825 | 0.792 | 0.828 | 0.835 | 0.777 | 0.817 | 0.841 | 0.786 | 0.795 | 0.772 |
| Xte19 | 0.872 | 0.848 | 0.880 | 0.829 | 0.863 | 0.859 | 0.882 | 0.859 | 0.851 | 0.841 | 0.857 | 0.884 | 0.846 | 0.864 | 0.873 |
| Xte20 | 0.955 | 0.953 | 0.957 | 0.963 | 0.960 | 0.962 | 0.958 | 0.959 | 0.959 | 0.955 | 0.962 | 0.959 | 0.963 | 0.961 | 0.957 |
| Xte22 | 0.955 | 0.959 | 0.937 | 0.945 | 0.954 | 0.949 | 0.954 | 0.953 | 0.948 | 0.953 | 0.956 | 0.949 | 0.951 | 0.945 | 0.956 |
| Xte24 | 0.944 | 0.935 | 0.939 | 0.944 | 0.939 | 0.927 | 0.931 | 0.940 | 0.941 | 0.945 | 0.945 | 0.952 | 0.948 | 0.943 | 0.942 |
| Xte25 | 0.357 | 0.356 | 0.340 | 0.284 | 0.313 | 0.311 | 0.321 | 0.362 | 0.316 | 0.378 | 0.381 | 0.275 | 0.362 | 0.306 | 0.346 |

**Supplemental Table 7.** Mean  $F$ -statistics and their standard errors for razorback sucker from Lake Mohave, Arizona and Nevada, (obtained by jackknifing across populations) calculated for each locus, including minimum and maximum values. The total estimate was obtained by jackknifing across loci.

| Locus | $F$    |       | $\Theta$ |       | $f$    |       |
|-------|--------|-------|----------|-------|--------|-------|
|       | Mean   | SE    | Mean     | SE    | Mean   | SE    |
| Xte1  | 0.043  | 0.026 | 0.019    | 0.007 | 0.025  | 0.024 |
| Xte2  | -0.055 | 0.007 | 0.000    | 0.001 | -0.055 | 0.007 |
| Xte7  | 0.043  | 0.021 | 0.010    | 0.003 | 0.034  | 0.020 |
| Xte8  | 0.038  | 0.011 | 0.002    | 0.001 | 0.037  | 0.011 |
| Xte10 | 0.104  | 0.025 | 0.027    | 0.009 | 0.079  | 0.023 |
| Xte11 | 0.054  | 0.023 | 0.001    | 0.001 | 0.053  | 0.023 |
| Xte12 | 0.044  | 0.009 | 0.008    | 0.002 | 0.036  | 0.009 |
| Xte16 | 0.030  | 0.009 | 0.001    | 0.001 | 0.028  | 0.009 |
| Xte17 | 0.072  | 0.012 | 0.003    | 0.001 | 0.069  | 0.011 |
| Xte18 | 0.091  | 0.021 | 0.007    | 0.003 | 0.085  | 0.021 |
| Xte19 | 0.021  | 0.007 | 0.002    | 0.001 | 0.019  | 0.006 |
| Xte20 | 0.081  | 0.010 | 0.001    | 0.000 | 0.080  | 0.010 |
| Xte22 | 0.165  | 0.018 | 0.002    | 0.001 | 0.164  | 0.018 |
| Xte24 | 0.051  | 0.010 | 0.002    | 0.001 | 0.049  | 0.010 |
| Xte25 | 0.007  | 0.023 | 0.000    | 0.001 | 0.007  | 0.022 |
| Total | 0.063  | 0.011 | 0.005    | 0.002 | 0.058  | 0.011 |
